# Supplementary material for: Arabidopsis RCD1 coordinates chloroplast and mitochondrial functions through interaction with ANAC transcription factors
Source: eLife journal article supplement (doi:10.7554/elife.43284), 2019-02-15
Supplement: supp [file elife-43284-supp-v1.zip]

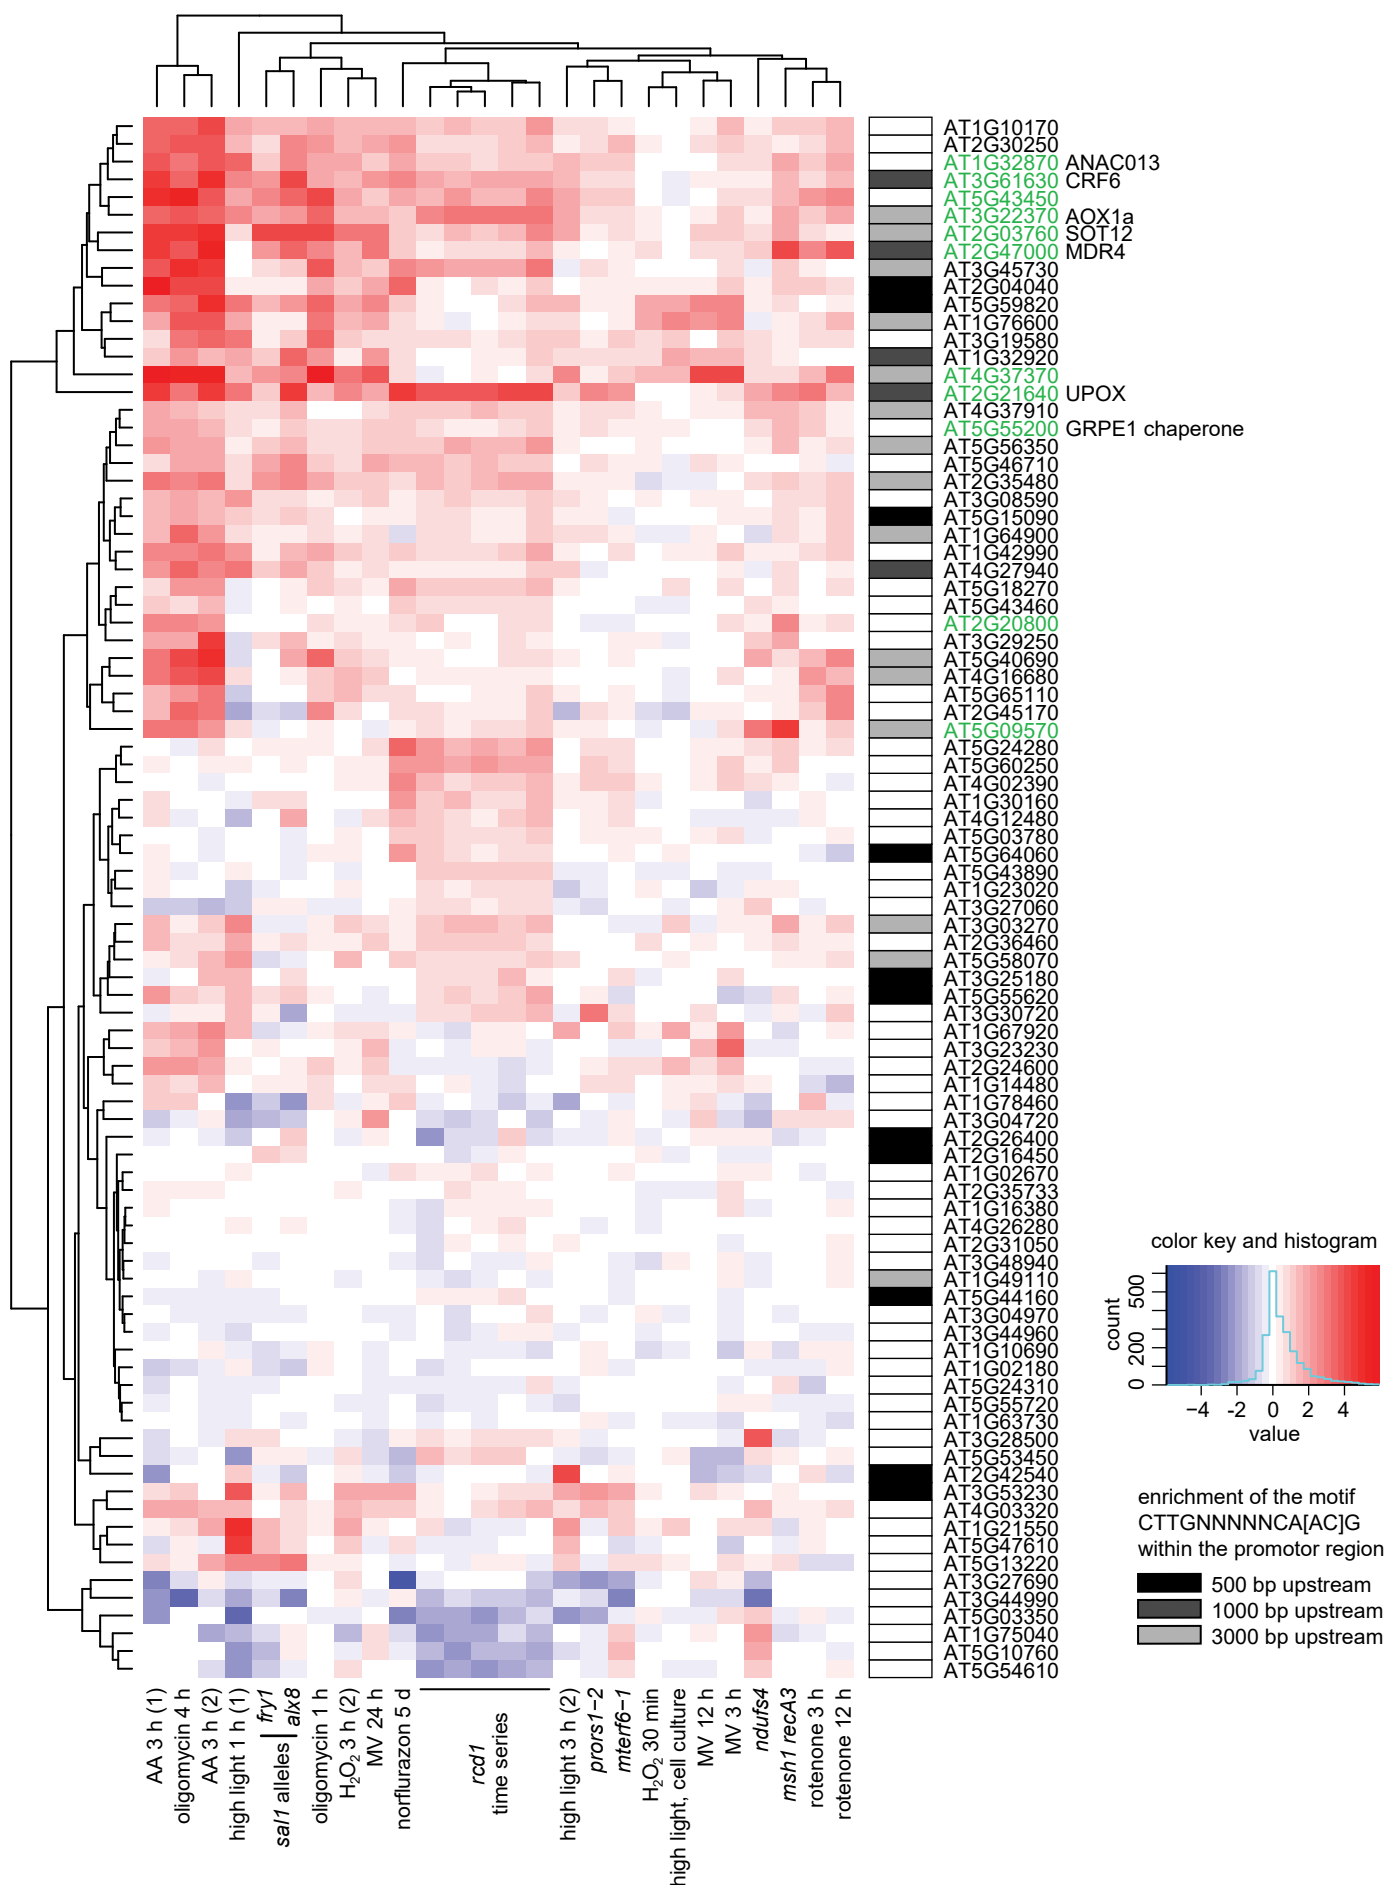

**Figure 6 – figure supplement 1. Clustering analysis of genes mis-regulated in *rad1* (with cutoff of  $\log FC < 0.5$ ) in published gene expression data sets acquired after perturbations of chloroplasts or mitochondria.**
