# Supplementary material for: Arabidopsis RCD1 coordinates chloroplast and mitochondrial functions through interaction with ANAC transcription factors
Source: eLife journal article supplement (doi:10.7554/elife.43284), 2019-02-15
Supplement: supp [file elife-43284-supp-v1.zip]

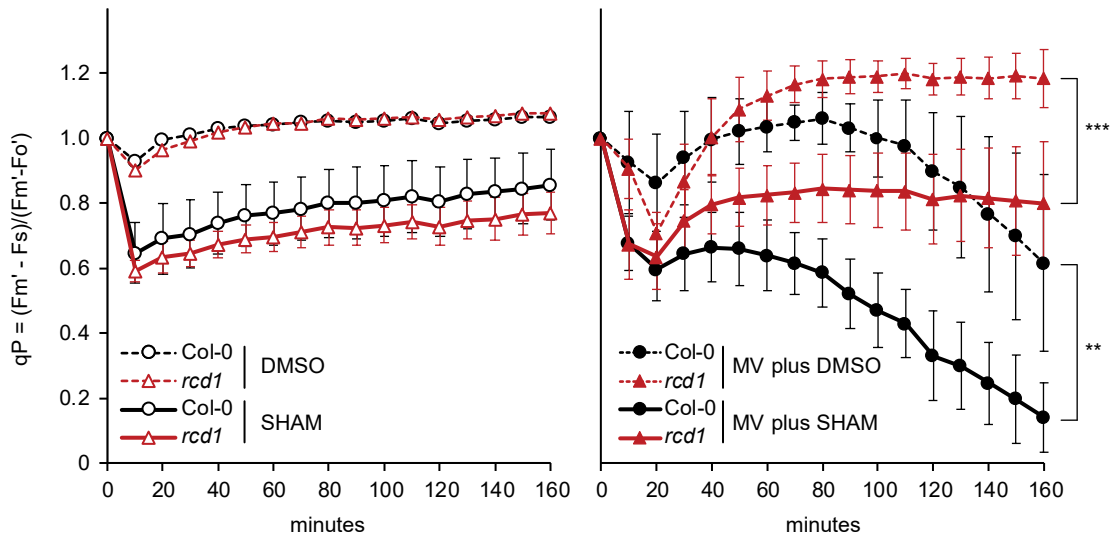

**Figure 5 – figure supplement 1. Alternations in chloroplast electron transfer induced by MV and SHAM.**
