# Supplementary material for: Arabidopsis RCD1 coordinates chloroplast and mitochondrial functions through interaction with ANAC transcription factors
Source: eLife journal article supplement (doi:10.7554/elife.43284), 2019-02-15
Supplement: supp [file elife-43284-supp-v1.zip]

**A**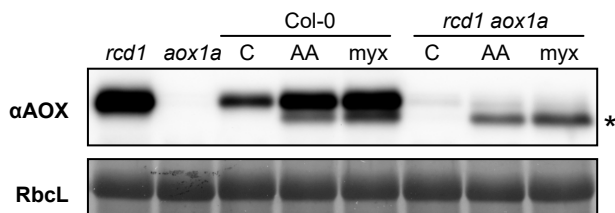**B**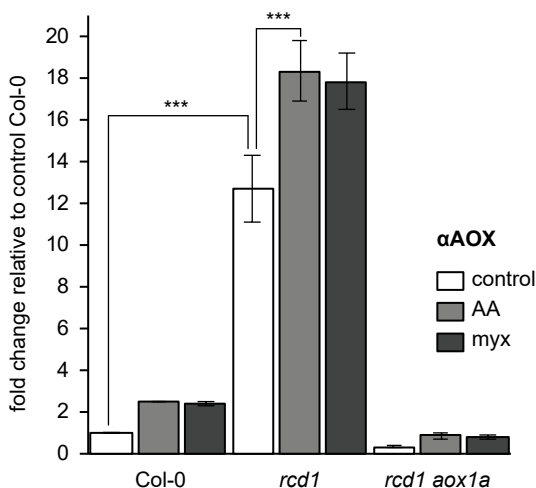

**Figure 4 – figure supplement 1. Effect of mitochondrial complex III inhibitors on expression of AOXs in Col-0 and *rcd1*.**
