# Supplementary material for: Arabidopsis RCD1 coordinates chloroplast and mitochondrial functions through interaction with ANAC transcription factors
Source: eLife journal article supplement (doi:10.7554/elife.43284), 2019-02-15
Supplement: supp [file elife-43284-supp-v1.zip]

Archive with 33 entries (33 files):
- elife_poa_e43284_Figure_7_figure_supplement_1.pdf
- elife_poa_e43284_Figure_2_source_data_1.xlsx
- elife_poa_e43284_Figure_3_source_data_1.xlsx
- elife_poa_e43284_Figure_1_figure_supplement_1.pdf
- elife_poa_e43284_Figure_3_source_data_2.xlsx
- elife_poa_e43284_Figure_6_figure_supplement_3.pdf
- elife_poa_e43284_Figure_4_figure_supplement_1.pdf
- elife_poa_e43284_Figure_7_figure_supplement_2.pdf
- elife_poa_e43284_Figure_7_source_data_4.xlsx
- elife_poa_e43284_Figure_4_figure_supplement_4.pdf
- elife_poa_e43284_Figure_4_figure_supplement_3.pdf
- elife_poa_e43284_Figure_1_source_data_1.xlsx
- elife_poa_e43284_Transparent_Reporting_File.docx
- elife_poa_e43284_Figure_1_figure_supplement_2.pdf
- elife_poa_e43284_Figure_5_figure_supplement_2.pdf
- elife_poa_e43284_Figure_5_figure_supplement_1.pdf
- elife_poa_e43284_Figure_6_figure_supplement_1.pdf
- elife_poa_e43284_Figure_6_source_data_1.xlsx
- elife_poa_e43284_Figure_4_figure_supplement_2.pdf
- elife_poa_e43284_Figure_1_figure_supplement_3.pdf
- elife_poa_e43284_Figure_7_source_data_2.xlsx
- elife_poa_e43284_Figure_5_source_data_1.xlsx
- elife_poa_e43284_Figure_1_figure_supplement_5.pdf
- elife_poa_e43284_Figure_7_source_data_1.xlsx
- elife_poa_e43284_Supplementary_File_1.xlsx
- elife_poa_e43284_Figure_7_figure_supplement_3.pdf
- elife_poa_e43284_Figure_1_figure_supplement_4.pdf
- elife_poa_e43284_Figure_8_figure_supplement_1.pdf
- elife_poa_e43284_Figure_4_source_data_1.xlsx
- elife_poa_e43284_Figure_7_source_data_3.docx
- elife_poa_e43284_Figure_6_figure_supplement_2.pdf
- elife_poa_e43284_Figure_8_source_data_1.xlsx
- elife_poa_e43284_Figure_2_figure_supplement_1.pdf
