# Supplementary material for: Arabidopsis RCD1 coordinates chloroplast and mitochondrial functions through interaction with ANAC transcription factors
Source: eLife journal article supplement (doi:10.7554/elife.43284), 2019-02-15
Supplement: supp [file elife-43284-supp-v1.zip]

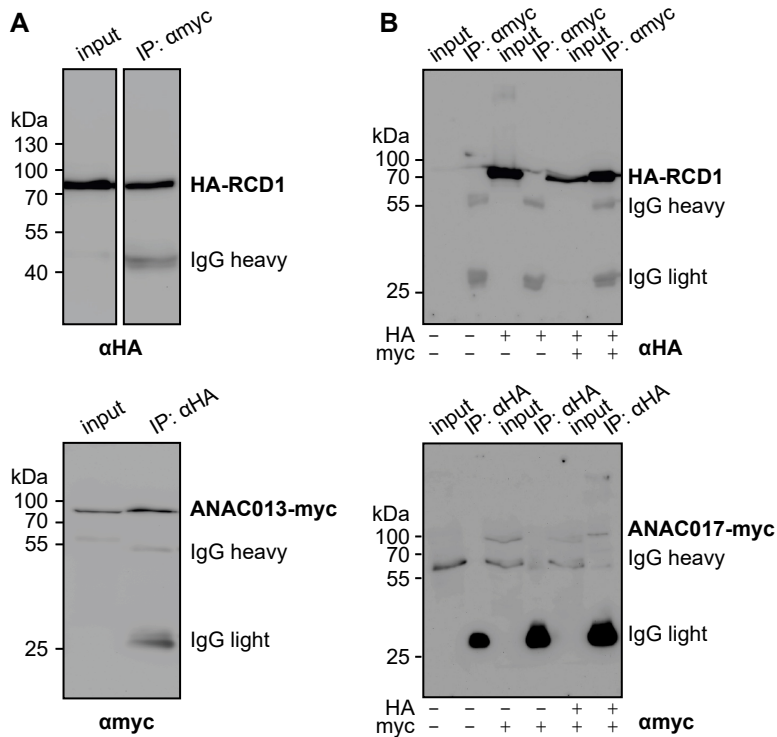

**Figure 7 – figure supplement 1. Biochemical interaction of RCD1 with ANAC013/ ANAC017 transcription factors in human embryonic kidney (HEK293) cells.**
