# Supplementary material for: Arabidopsis RCD1 coordinates chloroplast and mitochondrial functions through interaction with ANAC transcription factors
Source: eLife journal article supplement (doi:10.7554/elife.43284), 2019-02-15
Supplement: supp [file elife-43284-supp-v1.zip › elife_poa_e43284_Figure_1_figure_supplement_2.pdf]

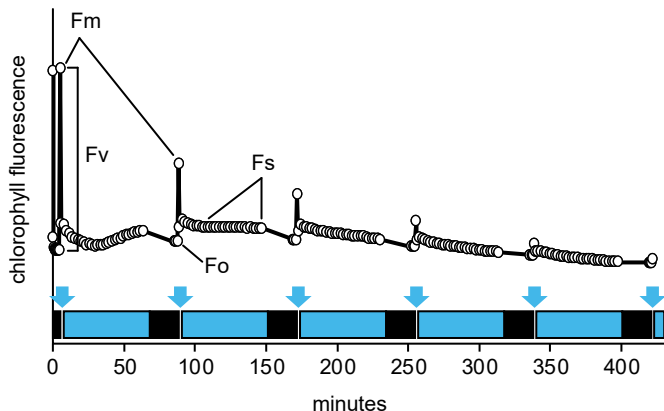

**Figure 1 – figure supplement 2. The Imaging PAM protocol developed to monitor kinetics of PSII inhibition by repetitive 1-hour light cycles.**
