# Supplementary material for: Arabidopsis RCD1 coordinates chloroplast and mitochondrial functions through interaction with ANAC transcription factors
Source: eLife journal article supplement (doi:10.7554/elife.43284), 2019-02-15
Supplement: supp [file elife-43284-supp-v1.zip › elife_poa_e43284_Figure_2_source_data_1.xlsx]

## Sheet: Fig. 2 - figure supplement 1C
Source data
Same dataset as in Fig. 1 figure supplement 1B
	ImageJ quantification of the αHA immunoblotting signal	Fv/Fm of leaf discs pre-treated with 0.25 μM MV after two 1-hour light periods
Col-0	0	0.155063
	0	0.35619
	116.621	0.166369
		0.194946
		0.226345
		0.247807
		0.163265
		0.52973
rcd1	0	0.719855
	30.0726	0.726246
	77.8519	0.713783
		0.702929
RCD1-HA (1.2)	1939.02	0.228374
	2375.11	0.288603
	2667.91	0.33045
		0.333333
RCD1-HA (2.1)	85.6689	0.294314
	164.411	0.444984
	136.775	0.642361
		0.274648
RCD1-HA (4.1)	53.7851	0.652419
	126.739	0.658586
	79.3088	0.662011
		0.65
RCD1-HA (4.3)	1735.3	0.262542
	2343.27	0.220036
	2322.1	0.11878
		0.143556
RCD1-HA (5.1)	934.886	0.277895
	1289.1	0.236538
	1167.46	0.446266
		0.233743
RCD1-HA (6.3)	2461.91	0.189338
	2681.79	0.121265
	2258.63	0.2103
		0.368493
RCD1-HA (7.2)	351.673	0.666921
	333.858	0.661831
	223.718	0.728086
		0.263451
RCD1-HAa (RIL)	1937.63	0.411985
	2364.5	0.238776
	2049.41	0.184339
		0.131429
RCD1Δ7Cys-HA (5.2)	7268.39	0.283394
	11237.9	0.258503
	9527.8	0.491228
		0.390291
RCD1Δ7Cys-HA (6.4)	9136.44	0.424144
	12077.3	0.360294
	10631.4	0.244713
		0.300557
RCD1Δ7Cys-HA (8.1)	10838	0.556
	12789.4	0.231707
	10327.7	0.425331
		0.475329
ImageJ quantification of the αHA immunoblotting signal									Fv/Fm of leaf discs pre-treated with 0.25 μM MV after two 1-hour light periods
Oneway ANOVA									Oneway ANOVA
	Sum of Squares	df	Mean Square	F	Sig.					Sum of Squares	df	Mean Square	F	Sig.
Between Groups	6.42107e+08	12	5.35089e+07	84.7419	1.09526e-17				Between Groups	1.44268	12	0.120223	8.95633	2.99084e-08
Within Groups	1.64173e+07	26	631434						Within Groups	0.577201	43	0.0134233
Total	6.58524e+08	38							Total	2.01988	55
Post Hoc Tests									Post Hoc Tests
Multiple Comparisons. Bonferroni									Multiple Comparisons. Bonferroni
		Mean Difference (I-J)	Std. Error	Sig.	95% Confidence Interval						Mean Difference (I-J)	Std. Error	Sig.	95% Confidence Interval
					Lower Bound	Upper Bound								Lower Bound	Upper Bound
Col-0	rcd1	3	648.811	1	-2513.52	2519.52			Col-0	rcd1	-.46088*	0.0709488	5.41375e-06	-0.722131	-0.199619
	RCD1-HA (1.2)	-2288.33	648.811	0.123537	-4804.85	228.188				RCD1-HA (1.2)	-0.040125	0.0709488	1	-0.301381	0.221131
	RCD1-HA (2.1)	-90	648.811	1	-2606.52	2426.52				RCD1-HA (2.1)	-0.159125	0.0709488	1	-0.420381	0.102131
	RCD1-HA (4.1)	-47.6667	648.811	1	-2564.19	2468.85				RCD1-HA (4.1)	-.40087*	0.0709488	9.18259e-05	-0.662131	-0.139619
	RCD1-HA (4.3)	-2094.33	648.811	0.262177	-4610.85	422.188				RCD1-HA (4.3)	0.068375	0.0709488	1	-0.192881	0.329631
	RCD1-HA (5.1)	-1091.33	648.811	1	-3607.85	1425.19				RCD1-HA (5.1)	-0.043875	0.0709488	1	-0.305131	0.217381
	RCD1-HA (6.3)	-2428.67	648.811	0.0709743	-4945.19	87.8548				RCD1-HA (6.3)	0.032875	0.0709488	1	-0.228381	0.294131
	RCD1-HA (7.2)	-264.333	648.811	1	-2780.85	2252.19				RCD1-HA (7.2)	-.32513*	0.0709488	0.00305878	-0.586381	-0.0638686
	RCD1-HAa (RIL)	-2078	648.811	0.279083	-4594.52	438.522				RCD1-HAa (RIL)	0.013375	0.0709488	1	-0.247881	0.274631
	RCD1Δ7Cys-HA (5.2)	-9305.66667*	648.811	5.7097e-12	-11822.2	-6789.15				RCD1Δ7Cys-HA (5.2)	-0.100875	0.0709488	1	-0.362131	0.160381
	RCD1Δ7Cys-HA (6.4)	-10575.66667*	648.811	2.82989e-13	-13092.2	-8059.15				RCD1Δ7Cys-HA (6.4)	-0.077625	0.0709488	1	-0.338881	0.183631
	RCD1Δ7Cys-HA (8.1)	-11279.33333*	648.811	6.07284e-14	-13795.9	-8762.81				RCD1Δ7Cys-HA (8.1)	-0.167125	0.0709488	1	-0.428381	0.0941314
rcd1	Col-0	-3	648.811	1	-2519.52	2513.52			rcd1	Col-0	.46088*	0.0709488	5.41375e-06	0.199619	0.722131
	RCD1-HA (1.2)	-2291.33	648.811	0.122092	-4807.85	225.188				RCD1-HA (1.2)	.42075*	0.0819246	0.00050547	0.119077	0.722423
	RCD1-HA (2.1)	-93	648.811	1	-2609.52	2423.52				RCD1-HA (2.1)	.30175*	0.0819246	0.0498602	7.70688e-05	0.603423
	RCD1-HA (4.1)	-50.6667	648.811	1	-2567.19	2465.85				RCD1-HA (4.1)	0.06	0.0819246	1	-0.241673	0.361673
	RCD1-HA (4.3)	-2097.33	648.811	0.259181	-4613.85	419.188				RCD1-HA (4.3)	.52925*	0.0819246	6.10104e-06	0.227577	0.830923
	RCD1-HA (5.1)	-1094.33	648.811	1	-3610.85	1422.19				RCD1-HA (5.1)	.41700*	0.0819246	0.000587598	0.115327	0.718673
	RCD1-HA (6.3)	-2431.67	648.811	0.0701331	-4948.19	84.8548				RCD1-HA (6.3)	.49375*	0.0819246	2.60645e-05	0.192077	0.795423
	RCD1-HA (7.2)	-267.333	648.811	1	-2783.85	2249.19				RCD1-HA (7.2)	0.13575	0.0819246	1	-0.165923	0.437423
	RCD1-HAa (RIL)	-2081	648.811	0.275902	-4597.52	435.522				RCD1-HAa (RIL)	.47425*	0.0819246	5.77999e-05	0.172577	0.775923
	RCD1Δ7Cys-HA (5.2)	-9308.66667*	648.811	5.66719e-12	-11825.2	-6792.15				RCD1Δ7Cys-HA (5.2)	.36000*	0.0819246	0.00557677	0.0583271	0.661673
	RCD1Δ7Cys-HA (6.4)	-10578.66667*	648.811	2.81088e-13	-13095.2	-8062.15				RCD1Δ7Cys-HA (6.4)	.38325*	0.0819246	0.00224916	0.0815771	0.684923
	RCD1Δ7Cys-HA (8.1)	-11282.33333*	648.811	6.03418e-14	-13798.9	-8765.81				RCD1Δ7Cys-HA (8.1)	0.29375	0.0819246	0.0665734	-0.00792293	0.595423
RCD1-HA (1.2)	Col-0	2288.33	648.811	0.123537	-228.188	4804.85			RCD1-HA (1.2)	Col-0	0.040125	0.0709488	1	-0.221131	0.301381
	rcd1	2291.33	648.811	0.122092	-225.188	4807.85				rcd1	-.42075*	0.0819246	0.00050547	-0.722423	-0.119077
	RCD1-HA (2.1)	2198.33	648.811	0.175537	-318.188	4714.85				RCD1-HA (2.1)	-0.119	0.0819246	1	-0.420673	0.182673
	RCD1-HA (4.1)	2240.67	648.811	0.148866	-275.855	4757.19				RCD1-HA (4.1)	-.36075*	0.0819246	0.00541715	-0.662423	-0.0590771
	RCD1-HA (4.3)	194	648.811	1	-2322.52	2710.52				RCD1-HA (4.3)	0.1085	0.0819246	1	-0.193173	0.410173
	RCD1-HA (5.1)	1197	648.811	1	-1319.52	3713.52				RCD1-HA (5.1)	-0.00375	0.0819246	1	-0.305423	0.297923
	RCD1-HA (6.3)	-140.333	648.811	1	-2656.85	2376.19				RCD1-HA (6.3)	0.073	0.0819246	1	-0.228673	0.374673
	RCD1-HA (7.2)	2024	648.811	0.342763	-492.522	4540.52				RCD1-HA (7.2)	-0.285	0.0819246	0.0909816	-0.586673	0.0166729
	RCD1-HAa (RIL)	210.333	648.811	1	-2306.19	2726.85				RCD1-HAa (RIL)	0.0535	0.0819246	1	-0.248173	0.355173
	RCD1Δ7Cys-HA (5.2)	-7017.33333*	648.811	3.15272e-09	-9533.85	-4500.81				RCD1Δ7Cys-HA (5.2)	-0.06075	0.0819246	1	-0.362423	0.240923
	RCD1Δ7Cys-HA (6.4)	-8287.33333*	648.811	8.09368e-11	-10803.9	-5770.81				RCD1Δ7Cys-HA (6.4)	-0.0375	0.0819246	1	-0.339173	0.264173
	RCD1Δ7Cys-HA (8.1)	-8991.00000*	648.811	1.26384e-11	-11507.5	-6474.48				RCD1Δ7Cys-HA (8.1)	-0.127	0.0819246	1	-0.428673	0.174673
RCD1-HA (2.1)	Col-0	90	648.811	1	-2426.52	2606.52			RCD1-HA (2.1)	Col-0	0.159125	0.0709488	1	-0.102131	0.420381
	rcd1	93	648.811	1	-2423.52	2609.52				rcd1	-.30175*	0.0819246	0.0498602	-0.603423	-7.70688e-05
	RCD1-HA (1.2)	-2198.33	648.811	0.175537	-4714.85	318.188				RCD1-HA (1.2)	0.119	0.0819246	1	-0.182673	0.420673
	RCD1-HA (4.1)	42.3333	648.811	1	-2474.19	2558.85				RCD1-HA (4.1)	-0.24175	0.0819246	0.398765	-0.543423	0.0599229
	RCD1-HA (4.3)	-2004.33	648.811	0.369247	-4520.85	512.188				RCD1-HA (4.3)	0.2275	0.0819246	0.631516	-0.0741729	0.529173
	RCD1-HA (5.1)	-1001.33	648.811	1	-3517.85	1515.19				RCD1-HA (5.1)	0.11525	0.0819246	1	-0.186423	0.416923
	RCD1-HA (6.3)	-2338.67	648.811	0.101352	-4855.19	177.855				RCD1-HA (6.3)	0.192	0.0819246	1	-0.109673	0.493673
	RCD1-HA (7.2)	-174.333	648.811	1	-2690.85	2342.19				RCD1-HA (7.2)	-0.166	0.0819246	1	-0.467673	0.135673
	RCD1-HAa (RIL)	-1988	648.811	0.392721	-4504.52	528.522				RCD1-HAa (RIL)	0.1725	0.0819246	1	-0.129173	0.474173
	RCD1Δ7Cys-HA (5.2)	-9215.66667*	648.811	7.15109e-12	-11732.2	-6699.15				RCD1Δ7Cys-HA (5.2)	0.05825	0.0819246	1	-0.243423	0.359923
	RCD1Δ7Cys-HA (6.4)	-10485.66667*	648.811	3.46667e-13	-13002.2	-7969.15				RCD1Δ7Cys-HA (6.4)	0.0815	0.0819246	1	-0.220173	0.383173
	RCD1Δ7Cys-HA (8.1)	-11189.33333*	648.811	7.36019e-14	-13705.9	-8672.81				RCD1Δ7Cys-HA (8.1)	-0.008	0.0819246	1	-0.309673	0.293673
RCD1-HA (4.1)	Col-0	47.6667	648.811	1	-2468.85	2564.19			RCD1-HA (4.1)	Col-0	.40087*	0.0709488	9.18259e-05	0.139619	0.662131
	rcd1	50.6667	648.811	1	-2465.85	2567.19				rcd1	-0.06	0.0819246	1	-0.361673	0.241673
	RCD1-HA (1.2)	-2240.67	648.811	0.148866	-4757.19	275.855				RCD1-HA (1.2)	.36075*	0.0819246	0.00541715	0.0590771	0.662423
	RCD1-HA (2.1)	-42.3333	648.811	1	-2558.85	2474.19				RCD1-HA (2.1)	0.24175	0.0819246	0.398765	-0.0599229	0.543423
	RCD1-HA (4.3)	-2046.67	648.811	0.314496	-4563.19	469.855				RCD1-HA (4.3)	.46925*	0.0819246	7.08707e-05	0.167577	0.770923
	RCD1-HA (5.1)	-1043.67	648.811	1	-3560.19	1472.85				RCD1-HA (5.1)	.35700*	0.0819246	0.00626253	0.0553271	0.658673
	RCD1-HA (6.3)	-2381	648.811	0.0857439	-4897.52	135.522				RCD1-HA (6.3)	.43375*	0.0819246	0.000299404	0.132077	0.735423
	RCD1-HA (7.2)	-216.667	648.811	1	-2733.19	2299.85				RCD1-HA (7.2)	0.07575	0.0819246	1	-0.225923	0.377423
	RCD1-HAa (RIL)	-2030.33	648.811	0.334629	-4546.85	486.188				RCD1-HAa (RIL)	.41425*	0.0819246	0.000656086	0.112577	0.715923
	RCD1Δ7Cys-HA (5.2)	-9258.00000*	648.811	6.43127e-12	-11774.5	-6741.48				RCD1Δ7Cys-HA (5.2)	0.3	0.0819246	0.0531297	-0.00167293	0.601673
	RCD1Δ7Cys-HA (6.4)	-10528.00000*	648.811	3.15047e-13	-13044.5	-8011.48				RCD1Δ7Cys-HA (6.4)	.32325*	0.0819246	0.0225791	0.0215771	0.624923
	RCD1Δ7Cys-HA (8.1)	-11231.66667*	648.811	6.7227e-14	-13748.2	-8715.15				RCD1Δ7Cys-HA (8.1)	0.23375	0.0819246	0.51712	-0.0679229	0.535423
RCD1-HA (4.3)	Col-0	2094.33	648.811	0.262177	-422.188	4610.85			RCD1-HA (4.3)	Col-0	-0.068375	0.0709488	1	-0.329631	0.192881
	rcd1	2097.33	648.811	0.259181	-419.188	4613.85				rcd1	-.52925*	0.0819246	6.10104e-06	-0.830923	-0.227577
	RCD1-HA (1.2)	-194	648.811	1	-2710.52	2322.52				RCD1-HA (1.2)	-0.1085	0.0819246	1	-0.410173	0.193173
	RCD1-HA (2.1)	2004.33	648.811	0.369247	-512.188	4520.85				RCD1-HA (2.1)	-0.2275	0.0819246	0.631516	-0.529173	0.0741729
	RCD1-HA (4.1)	2046.67	648.811	0.314496	-469.855	4563.19				RCD1-HA (4.1)	-.46925*	0.0819246	7.08707e-05	-0.770923	-0.167577
	RCD1-HA (5.1)	1003	648.811	1	-1513.52	3519.52				RCD1-HA (5.1)	-0.11225	0.0819246	1	-0.413923	0.189423
	RCD1-HA (6.3)	-334.333	648.811	1	-2850.85	2182.19				RCD1-HA (6.3)	-0.0355	0.0819246	1	-0.337173	0.266173
	RCD1-HA (7.2)	1830	648.811	0.706435	-686.522	4346.52				RCD1-HA (7.2)	-.39350*	0.0819246	0.00150018	-0.695173	-0.0918271
	RCD1-HAa (RIL)	16.3333	648.811	1	-2500.19	2532.85				RCD1-HAa (RIL)	-0.055	0.0819246	1	-0.356673	0.246673
	RCD1Δ7Cys-HA (5.2)	-7211.33333*	648.811	1.75221e-09	-9727.85	-4694.81				RCD1Δ7Cys-HA (5.2)	-0.16925	0.0819246	1	-0.470923	0.132423
	RCD1Δ7Cys-HA (6.4)	-8481.33333*	648.811	4.79539e-11	-10997.9	-5964.81				RCD1Δ7Cys-HA (6.4)	-0.146	0.0819246	1	-0.447673	0.155673
	RCD1Δ7Cys-HA (8.1)	-9185.00000*	648.811	7.72419e-12	-11701.5	-6668.48				RCD1Δ7Cys-HA (8.1)	-0.2355	0.0819246	0.48873	-0.537173	0.0661729
RCD1-HA (5.1)	Col-0	1091.33	648.811	1	-1425.19	3607.85			RCD1-HA (5.1)	Col-0	0.043875	0.0709488	1	-0.217381	0.305131
	rcd1	1094.33	648.811	1	-1422.19	3610.85				rcd1	-.41700*	0.0819246	0.000587598	-0.718673	-0.115327
	RCD1-HA (1.2)	-1197	648.811	1	-3713.52	1319.52				RCD1-HA (1.2)	0.00375	0.0819246	1	-0.297923	0.305423
	RCD1-HA (2.1)	1001.33	648.811	1	-1515.19	3517.85				RCD1-HA (2.1)	-0.11525	0.0819246	1	-0.416923	0.186423
	RCD1-HA (4.1)	1043.67	648.811	1	-1472.85	3560.19				RCD1-HA (4.1)	-.35700*	0.0819246	0.00626253	-0.658673	-0.0553271
	RCD1-HA (4.3)	-1003	648.811	1	-3519.52	1513.52				RCD1-HA (4.3)	0.11225	0.0819246	1	-0.189423	0.413923
	RCD1-HA (6.3)	-1337.33	648.811	1	-3853.85	1179.19				RCD1-HA (6.3)	0.07675	0.0819246	1	-0.224923	0.378423
	RCD1-HA (7.2)	827	648.811	1	-1689.52	3343.52				RCD1-HA (7.2)	-0.28125	0.0819246	0.103881	-0.582923	0.0204229
	RCD1-HAa (RIL)	-986.667	648.811	1	-3503.19	1529.85				RCD1-HAa (RIL)	0.05725	0.0819246	1	-0.244423	0.358923
	RCD1Δ7Cys-HA (5.2)	-8214.33333*	648.811	9.87875e-11	-10730.9	-5697.81				RCD1Δ7Cys-HA (5.2)	-0.057	0.0819246	1	-0.358673	0.244673
	RCD1Δ7Cys-HA (6.4)	-9484.33333*	648.811	3.6705e-12	-12000.9	-6967.81				RCD1Δ7Cys-HA (6.4)	-0.03375	0.0819246	1	-0.335423	0.267923
	RCD1Δ7Cys-HA (8.1)	-10188.00000*	648.811	6.85404e-13	-12704.5	-7671.48				RCD1Δ7Cys-HA (8.1)	-0.12325	0.0819246	1	-0.424923	0.178423
RCD1-HA (6.3)	Col-0	2428.67	648.811	0.0709743	-87.8548	4945.19			RCD1-HA (6.3)	Col-0	-0.032875	0.0709488	1	-0.294131	0.228381
	rcd1	2431.67	648.811	0.0701331	-84.8548	4948.19				rcd1	-.49375*	0.0819246	2.60645e-05	-0.795423	-0.192077
	RCD1-HA (1.2)	140.333	648.811	1	-2376.19	2656.85				RCD1-HA (1.2)	-0.073	0.0819246	1	-0.374673	0.228673
	RCD1-HA (2.1)	2338.67	648.811	0.101352	-177.855	4855.19				RCD1-HA (2.1)	-0.192	0.0819246	1	-0.493673	0.109673
	RCD1-HA (4.1)	2381	648.811	0.0857439	-135.522	4897.52				RCD1-HA (4.1)	-.43375*	0.0819246	0.000299404	-0.735423	-0.132077
	RCD1-HA (4.3)	334.333	648.811	1	-2182.19	2850.85				RCD1-HA (4.3)	0.0355	0.0819246	1	-0.266173	0.337173
	RCD1-HA (5.1)	1337.33	648.811	1	-1179.19	3853.85				RCD1-HA (5.1)	-0.07675	0.0819246	1	-0.378423	0.224923
	RCD1-HA (7.2)	2164.33	648.811	0.200257	-352.188	4680.85				RCD1-HA (7.2)	-.35800*	0.0819246	0.00602525	-0.659673	-0.0563271
	RCD1-HAa (RIL)	350.667	648.811	1	-2165.85	2867.19				RCD1-HAa (RIL)	-0.0195	0.0819246	1	-0.321173	0.282173
	RCD1Δ7Cys-HA (5.2)	-6877.00000*	648.811	4.85401e-09	-9393.52	-4360.48				RCD1Δ7Cys-HA (5.2)	-0.13375	0.0819246	1	-0.435423	0.167923
	RCD1Δ7Cys-HA (6.4)	-8147.00000*	648.811	1.18861e-10	-10663.5	-5630.48				RCD1Δ7Cys-HA (6.4)	-0.1105	0.0819246	1	-0.412173	0.191173
	RCD1Δ7Cys-HA (8.1)	-8850.66667*	648.811	1.81387e-11	-11367.2	-6334.15				RCD1Δ7Cys-HA (8.1)	-0.2	0.0819246	1	-0.501673	0.101673
RCD1-HA (7.2)	Col-0	264.333	648.811	1	-2252.19	2780.85			RCD1-HA (7.2)	Col-0	.32513*	0.0709488	0.00305878	0.0638686	0.586381
	rcd1	267.333	648.811	1	-2249.19	2783.85				rcd1	-0.13575	0.0819246	1	-0.437423	0.165923
	RCD1-HA (1.2)	-2024	648.811	0.342763	-4540.52	492.522				RCD1-HA (1.2)	0.285	0.0819246	0.0909816	-0.0166729	0.586673
	RCD1-HA (2.1)	174.333	648.811	1	-2342.19	2690.85				RCD1-HA (2.1)	0.166	0.0819246	1	-0.135673	0.467673
	RCD1-HA (4.1)	216.667	648.811	1	-2299.85	2733.19				RCD1-HA (4.1)	-0.07575	0.0819246	1	-0.377423	0.225923
	RCD1-HA (4.3)	-1830	648.811	0.706435	-4346.52	686.522				RCD1-HA (4.3)	.39350*	0.0819246	0.00150018	0.0918271	0.695173
	RCD1-HA (5.1)	-827	648.811	1	-3343.52	1689.52				RCD1-HA (5.1)	0.28125	0.0819246	0.103881	-0.0204229	0.582923
	RCD1-HA (6.3)	-2164.33	648.811	0.200257	-4680.85	352.188				RCD1-HA (6.3)	.35800*	0.0819246	0.00602525	0.0563271	0.659673
	RCD1-HAa (RIL)	-1813.67	648.811	0.749883	-4330.19	702.855				RCD1-HAa (RIL)	.33850*	0.0819246	0.0127166	0.0368271	0.640173
	RCD1Δ7Cys-HA (5.2)	-9041.33333*	648.811	1.1114e-11	-11557.9	-6524.81				RCD1Δ7Cys-HA (5.2)	0.22425	0.0819246	0.699877	-0.0774229	0.525923
	RCD1Δ7Cys-HA (6.4)	-10311.33333*	648.811	5.1575e-13	-12827.9	-7794.81				RCD1Δ7Cys-HA (6.4)	0.2475	0.0819246	0.329907	-0.0541729	0.549173
	RCD1Δ7Cys-HA (8.1)	-11015.00000*	648.811	1.07214e-13	-13531.5	-8498.48				RCD1Δ7Cys-HA (8.1)	0.158	0.0819246	1	-0.143673	0.459673
RCD1-HAa (RIL)	Col-0	2078	648.811	0.279083	-438.522	4594.52			RCD1-HAa (RIL)	Col-0	-0.013375	0.0709488	1	-0.274631	0.247881
	rcd1	2081	648.811	0.275902	-435.522	4597.52				rcd1	-.47425*	0.0819246	5.77999e-05	-0.775923	-0.172577
	RCD1-HA (1.2)	-210.333	648.811	1	-2726.85	2306.19				RCD1-HA (1.2)	-0.0535	0.0819246	1	-0.355173	0.248173
	RCD1-HA (2.1)	1988	648.811	0.392721	-528.522	4504.52				RCD1-HA (2.1)	-0.1725	0.0819246	1	-0.474173	0.129173
	RCD1-HA (4.1)	2030.33	648.811	0.334629	-486.188	4546.85				RCD1-HA (4.1)	-.41425*	0.0819246	0.000656086	-0.715923	-0.112577
	RCD1-HA (4.3)	-16.3333	648.811	1	-2532.85	2500.19				RCD1-HA (4.3)	0.055	0.0819246	1	-0.246673	0.356673
	RCD1-HA (5.1)	986.667	648.811	1	-1529.85	3503.19				RCD1-HA (5.1)	-0.05725	0.0819246	1	-0.358923	0.244423
	RCD1-HA (6.3)	-350.667	648.811	1	-2867.19	2165.85				RCD1-HA (6.3)	0.0195	0.0819246	1	-0.282173	0.321173
	RCD1-HA (7.2)	1813.67	648.811	0.749883	-702.855	4330.19				RCD1-HA (7.2)	-.33850*	0.0819246	0.0127166	-0.640173	-0.0368271
	RCD1Δ7Cys-HA (5.2)	-7227.66667*	648.811	1.66847e-09	-9744.19	-4711.15				RCD1Δ7Cys-HA (5.2)	-0.11425	0.0819246	1	-0.415923	0.187423
	RCD1Δ7Cys-HA (6.4)	-8497.66667*	648.811	4.59053e-11	-11014.2	-5981.15				RCD1Δ7Cys-HA (6.4)	-0.091	0.0819246	1	-0.392673	0.210673
	RCD1Δ7Cys-HA (8.1)	-9201.33333*	648.811	7.41327e-12	-11717.9	-6684.81				RCD1Δ7Cys-HA (8.1)	-0.1805	0.0819246	1	-0.482173	0.121173
RCD1Δ7Cys-HA (5.2)	Col-0	9305.66667*	648.811	5.7097e-12	6789.15	11822.2			RCD1Δ7Cys-HA (5.2)	Col-0	0.100875	0.0709488	1	-0.160381	0.362131
	rcd1	9308.66667*	648.811	5.66719e-12	6792.15	11825.2				rcd1	-.36000*	0.0819246	0.00557677	-0.661673	-0.0583271
	RCD1-HA (1.2)	7017.33333*	648.811	3.15272e-09	4500.81	9533.85				RCD1-HA (1.2)	0.06075	0.0819246	1	-0.240923	0.362423
	RCD1-HA (2.1)	9215.66667*	648.811	7.15109e-12	6699.15	11732.2				RCD1-HA (2.1)	-0.05825	0.0819246	1	-0.359923	0.243423
	RCD1-HA (4.1)	9258.00000*	648.811	6.43127e-12	6741.48	11774.5				RCD1-HA (4.1)	-0.3	0.0819246	0.0531297	-0.601673	0.00167293
	RCD1-HA (4.3)	7211.33333*	648.811	1.75221e-09	4694.81	9727.85				RCD1-HA (4.3)	0.16925	0.0819246	1	-0.132423	0.470923
	RCD1-HA (5.1)	8214.33333*	648.811	9.87875e-11	5697.81	10730.9				RCD1-HA (5.1)	0.057	0.0819246	1	-0.244673	0.358673
	RCD1-HA (6.3)	6877.00000*	648.811	4.85401e-09	4360.48	9393.52				RCD1-HA (6.3)	0.13375	0.0819246	1	-0.167923	0.435423
	RCD1-HA (7.2)	9041.33333*	648.811	1.1114e-11	6524.81	11557.9				RCD1-HA (7.2)	-0.22425	0.0819246	0.699877	-0.525923	0.0774229
	RCD1-HAa (RIL)	7227.66667*	648.811	1.66847e-09	4711.15	9744.19				RCD1-HAa (RIL)	0.11425	0.0819246	1	-0.187423	0.415923
	RCD1Δ7Cys-HA (6.4)	-1270	648.811	1	-3786.52	1246.52				RCD1Δ7Cys-HA (6.4)	0.02325	0.0819246	1	-0.278423	0.324923
	RCD1Δ7Cys-HA (8.1)	-1973.67	648.811	0.41449	-4490.19	542.855				RCD1Δ7Cys-HA (8.1)	-0.06625	0.0819246	1	-0.367923	0.235423
RCD1Δ7Cys-HA (6.4)	Col-0	10575.66667*	648.811	2.82989e-13	8059.15	13092.2			RCD1Δ7Cys-HA (6.4)	Col-0	0.077625	0.0709488	1	-0.183631	0.338881
	rcd1	10578.66667*	648.811	2.81088e-13	8062.15	13095.2				rcd1	-.38325*	0.0819246	0.00224916	-0.684923	-0.0815771
	RCD1-HA (1.2)	8287.33333*	648.811	8.09368e-11	5770.81	10803.9				RCD1-HA (1.2)	0.0375	0.0819246	1	-0.264173	0.339173
	RCD1-HA (2.1)	10485.66667*	648.811	3.46667e-13	7969.15	13002.2				RCD1-HA (2.1)	-0.0815	0.0819246	1	-0.383173	0.220173
	RCD1-HA (4.1)	10528.00000*	648.811	3.15047e-13	8011.48	13044.5				RCD1-HA (4.1)	-.32325*	0.0819246	0.0225791	-0.624923	-0.0215771
	RCD1-HA (4.3)	8481.33333*	648.811	4.79539e-11	5964.81	10997.9				RCD1-HA (4.3)	0.146	0.0819246	1	-0.155673	0.447673
	RCD1-HA (5.1)	9484.33333*	648.811	3.6705e-12	6967.81	12000.9				RCD1-HA (5.1)	0.03375	0.0819246	1	-0.267923	0.335423
	RCD1-HA (6.3)	8147.00000*	648.811	1.18861e-10	5630.48	10663.5				RCD1-HA (6.3)	0.1105	0.0819246	1	-0.191173	0.412173
	RCD1-HA (7.2)	10311.33333*	648.811	5.1575e-13	7794.81	12827.9				RCD1-HA (7.2)	-0.2475	0.0819246	0.329907	-0.549173	0.0541729
	RCD1-HAa (RIL)	8497.66667*	648.811	4.59053e-11	5981.15	11014.2				RCD1-HAa (RIL)	0.091	0.0819246	1	-0.210673	0.392673
	RCD1Δ7Cys-HA (5.2)	1270	648.811	1	-1246.52	3786.52				RCD1Δ7Cys-HA (5.2)	-0.02325	0.0819246	1	-0.324923	0.278423
	RCD1Δ7Cys-HA (8.1)	-703.667	648.811	1	-3220.19	1812.85				RCD1Δ7Cys-HA (8.1)	-0.0895	0.0819246	1	-0.391173	0.212173
RCD1Δ7Cys-HA (8.1)	Col-0	11279.33333*	648.811	6.07284e-14	8762.81	13795.9			RCD1Δ7Cys-HA (8.1)	Col-0	0.167125	0.0709488	1	-0.0941314	0.428381
	rcd1	11282.33333*	648.811	6.03418e-14	8765.81	13798.9				rcd1	-0.29375	0.0819246	0.0665734	-0.595423	0.00792293
	RCD1-HA (1.2)	8991.00000*	648.811	1.26384e-11	6474.48	11507.5				RCD1-HA (1.2)	0.127	0.0819246	1	-0.174673	0.428673
	RCD1-HA (2.1)	11189.33333*	648.811	7.36019e-14	8672.81	13705.9				RCD1-HA (2.1)	0.008	0.0819246	1	-0.293673	0.309673
	RCD1-HA (4.1)	11231.66667*	648.811	6.7227e-14	8715.15	13748.2				RCD1-HA (4.1)	-0.23375	0.0819246	0.51712	-0.535423	0.0679229
	RCD1-HA (4.3)	9185.00000*	648.811	7.72419e-12	6668.48	11701.5				RCD1-HA (4.3)	0.2355	0.0819246	0.48873	-0.0661729	0.537173
	RCD1-HA (5.1)	10188.00000*	648.811	6.85404e-13	7671.48	12704.5				RCD1-HA (5.1)	0.12325	0.0819246	1	-0.178423	0.424923
	RCD1-HA (6.3)	8850.66667*	648.811	1.81387e-11	6334.15	11367.2				RCD1-HA (6.3)	0.2	0.0819246	1	-0.101673	0.501673
	RCD1-HA (7.2)	11015.00000*	648.811	1.07214e-13	8498.48	13531.5				RCD1-HA (7.2)	-0.158	0.0819246	1	-0.459673	0.143673
	RCD1-HAa (RIL)	9201.33333*	648.811	7.41327e-12	6684.81	11717.9				RCD1-HAa (RIL)	0.1805	0.0819246	1	-0.121173	0.482173
	RCD1Δ7Cys-HA (5.2)	1973.67	648.811	0.41449	-542.855	4490.19				RCD1Δ7Cys-HA (5.2)	0.06625	0.0819246	1	-0.235423	0.367923
	RCD1Δ7Cys-HA (6.4)	703.667	648.811	1	-1812.85	3220.19				RCD1Δ7Cys-HA (6.4)	0.0895	0.0819246	1	-0.212173	0.391173
*. The mean difference is significant at the 0.05 level.									*. The mean difference is significant at the 0.05 level.

## Sheet: Fig. 2 - figure supplement 1D
Source data
Repeat 1		AOX1a	UPOX	ZAT12		PP2AA3	TIP41	YLS8
Control	Col-0	0.625739	0.637888	0.107013		0.948388	1.07138	0.984167
	rcd1	4.09509	44.748	0.495115		0.950494	1.07261	0.980862
	RCD1-HA (RIL)	0.412927	0.224809	0.125937		0.951109	1.13088	0.929719
	RCD1-HA (1.2)	0.391364	0.271155	0.128252		0.95568	1.08218	0.966913
	RCD1Δ7Cys-HA (5.2)	0.842926	0.688109	0.148604		1.09	0.784325	1.16971
	RCD1Δ7Cys-HA (6.4)	0.608546	0.337859	0.148226		1.01311	1.06793	0.924272
MV	Col-0	0.887658	0.803397	7.74398		0.959609	0.970013	1.07431
	rcd1	4.12319	45.8921	0.655074		0.927244	1.15225	0.935962
	RCD1-HA (RIL)	0.736519	0.413038	8.6294		1.04186	0.921137	1.042
	RCD1-HA (1.2)	1.29793	0.493628	10.8239		1.03783	0.895591	1.07588
	RCD1Δ7Cys-HA (5.2)	1.44788	0.79664	12.3012		1.15181	1.02221	0.849336
	RCD1Δ7Cys-HA (6.4)	0.929308	0.412799	9.10161		0.997313	0.900653	1.1133
Repeat 2		AOX1a	UPOX	ZAT12		PP2AA3	TIP41	YLS8
Control	Col-0	0.636428	0.376761	0.240866		1.04458	0.99804	0.959202
	rcd1	4.10547	35.6498	0.460755		0.994326	1.06868	0.941074
	RCD1-HA (RIL)	0.586258	0.301314	0.253942		0.965991	1.09994	0.941147
	RCD1-HA (1.2)	0.569953	0.319241	0.245782		0.996075	1.11695	0.898823
	RCD1Δ7Cys-HA (5.2)	1.10759	0.497968	0.23386		1.0448	1.03644	0.923472
	RCD1Δ7Cys-HA (6.4)	0.69115	0.278847	0.211287		1.03721	1.01352	0.95126
MV	Col-0	0.782854	0.411174	4.30828		0.914166	1.02724	1.06488
	rcd1	4.38266	35.7547	0.633769		1.05377	0.887098	1.06975
	RCD1-HA (RIL)	0.707239	0.37745	5.56348		1.01061	0.976056	1.01377
	RCD1-HA (1.2)	0.819794	0.439245	5.53638		0.975699	1.02599	0.998946
	RCD1Δ7Cys-HA (5.2)	0.902759	4.8745	5.66903		0.995416	0.800085	1.25562
	RCD1Δ7Cys-HA (6.4)	0.833196	0.469154	6.12808		0.976541	0.995005	1.02916
Average of two repeats (N = 2)		AOX1a	UPOX	ZAT12		PP2AA3	TIP41	YLS8
Control	Col-0	0.631084	0.507324	0.17394		0.996484	1.03471	0.971684
	rcd1	4.10028	40.1989	0.477935		0.97241	1.07065	0.960968
	RCD1-HA (RIL)	0.499592	0.263061	0.18994		0.95855	1.11541	0.935433
	RCD1-HA (1.2)	0.480659	0.295198	0.187017		0.975878	1.09957	0.932868
	RCD1Δ7Cys-HA (5.2)	0.975258	0.593038	0.191232		1.0674	0.910383	1.04659
	RCD1Δ7Cys-HA (6.4)	0.649848	0.308353	0.179756		1.02516	1.04073	0.937766
MV	Col-0	0.835256	0.607285	6.02613		0.936887	0.998628	1.06959
	rcd1	4.25293	40.8234	0.644422		0.990505	1.01968	1.00286
	RCD1-HA (RIL)	0.721879	0.395244	7.09644		1.02624	0.948597	1.02788
	RCD1-HA (1.2)	1.05886	0.466436	8.18013		1.00676	0.960789	1.03741
	RCD1Δ7Cys-HA (5.2)	1.17532	2.83557	8.98512		1.07361	0.911146	1.05248
	RCD1Δ7Cys-HA (6.4)	0.881252	0.440977	7.61485		0.986927	0.947829	1.07123
