# Supplementary material for: Arabidopsis RCD1 coordinates chloroplast and mitochondrial functions through interaction with ANAC transcription factors
Source: eLife journal article supplement (doi:10.7554/elife.43284), 2019-02-15
Supplement: supp [file elife-43284-supp-v1.zip › elife_poa_e43284_Figure_3_source_data_1.xlsx]

## Sheet: 14C glucose partitioning
	light												dark
	Col-0			rcd1			rcd1 aox1a			aox1a			Col-0			rcd1			rcd1 aox1a			aox1a
Variable	Average		SE	Average		SE	Average		SE	Average		SE	Average		SE	Average		SE	Average		SE	Average		SE
Total uptake (Bq/gFW)	1348.99	±	106.511	2689.53	±	362.675	2337.22	±	399.171	1583.14	±	104.637	1139.13	±	215.935	2031.4	±	282.299	2101.77	±	343.938	1336.97	±	90.2694
Total metabolised (Bq/gFW)	1049.99	±	52.3108	2298.91	±	327.844	1811.59	±	374.402	1306.22	±	97.3522	850.562	±	183.08	1684.68	±	246.676	1783.97	±	314.816	1059.47	±	95.0155
CO2 evolution (Bq)	2.06433	±	0.486292	4.70192	±	2.12964	2.42267	±	0.994321	2.31763	±	0.64203	3.85542	±	0.660562	6.13511	±	1.77598	9.61454	±	1.42468	6.06304	±	1.59238
Organic acids (Bq)	54.0833	±	6.81498	71.2833	±	10.6666	52.5167	±	11.7989	63.0167	±	2.35457	48.0556	±	12.4954	56.4333	±	4.11484	50.65	±	5.49143	33.85	±	7.21682
Amino acids (Bq)	33.35	±	8.80166	37.1	±	15.4003	20.2833	±	7.46629	41.7667	±	10.3398	39.1333	±	8.3097	59.2222	±	11.6148	61.5167	±	8.05915	50.4	±	19.9559
Sucrose (Bq)	124.375	±	10.0065	206.875	±	25.4977	192.5	±	28.6547	145.938	±	2.51946	88.125	±	17.8525	142.917	±	25.3373	158.125	±	13.0753	75.3125	±	22.1523
Glucose (Bq)	36.875	±	2.13478	38.75	±	2.22439	55.625	±	19.3548	35	±	4.11425	34.7917	±	3.07248	35.625	±	2.89801	35	±	1.35015	31.5625	±	1.79518
Starch (Bq)	115.816	±	16.2179	209.635	±	22.4563	158.351	±	30.6259	139.878	±	8.15686	76.7245	±	20.7436	209.19	±	61.3935	149.844	±	31.2578	98.1944	±	11.235
Protein (Bq)	6.99653	±	1.0897	9.0625	±	0.750889	9.61806	±	0.382995	6.78819	±	0.575017	6.89815	±	1.47423	15.3241	±	3.78384	10.5382	±	2.58121	7.74306	±	0.346643
Cell wall (Bq)	24.5312	±	3.53876	40.1736	±	2.98725	39.0625	±	10.1334	28.4722	±	2.59156	22.8125	±	4.37576	21.2731	±	3.89376	32.1528	±	9.28355	25.434	±	5.96807
Fructose (Bq)	5.625	±	5.78477	0	±	1.5625	4.6875	±	6.02458	0	±	27.2879	0	±	4.55293	10.8333	±	3.65861	1.5625	±	4.18874	11.875	±	4.96078
Specific activity of hexose phosphates (Bq/ nmol)	0.179156	±	0.0229956	0.232555	±	0.036146		±	0.0382061	0.200107	±	0.0092736	0.185228	±	0.0527846	0.190631	±	0.021193	0.168133	±	0.0234023	0.110101	±	0.0221894
Metablic flux [nmol hexose equivalents/(gFW*h)]
Starch metabolic flux	1309.74	±	255.994	2324.35	±	168.69	3748.45	±	1889.05	1400.04	±	128.733	991.576	±	308.367	2605.07	±	559.752	2135.98	±	573.132	2485.11	±	893.657
Sucrose metabolic flux	1491.41	±	361.231	2324.15	±	291.603	4421.49	±	2265.32	1470.97	±	146.053	1130.27	±	264.815	1841.79	±	289.745	2168.66	±	231.667	1516.01	±	477.507
Respiration metabolic flux	1083.29	±	193.581	1312.57	±	154.872	1475.39	±	262.078	1124.3	±	106.038	1145.88	±	81.3239	1786.41	±	302.366	1798.89	±	152.707	2579.55	±	1130.02
Cell wall metabolic flux	242.88	±	50.62	451.01	±	39.913	867.723	±	398.741	284.531	±	32.0272	293.513	±	70.8993	273.595	±	46.7098	413.935	±	74.1735	745.334	±	404.457
