# Supplementary material for: Arabidopsis RCD1 coordinates chloroplast and mitochondrial functions through interaction with ANAC transcription factors
Source: eLife journal article supplement (doi:10.7554/elife.43284), 2019-02-15
Supplement: supp [file elife-43284-supp-v1.zip › elife_poa_e43284_Figure_3_source_data_2.xlsx]

## Sheet: Fig. 3
Source data				Oneway ANOVA
respiration flux
light	Col-0	1656.07			Sum of Squares	df	Mean Square	F	Sig.
		979.643		Between Groups	105141	1	105141	0.85538	0.390716
		828.591		Within Groups	737507	6	122918
		868.838		Total	842648	7
	rcd1	1560.23
		907.275
		1549.18
		1233.59
dark	Col-0	1458.03			Sum of Squares	df	Mean Square	F	Sig.
		1149.24		Between Groups	1.23082e+06	1	1.23082e+06	6.27719	0.0311555
		1010.55		Within Groups	1.96078e+06	10	196078
		1146.79		Total	3.1916e+06	11
		1047.82
		1062.88
	rcd1	1731.36
		1860
		1463.98
		2918.87
		1584.66
		1159.57
sucrose flux
light	Col-0	2488			Sum of Squares	df	Mean Square	F	Sig.
		1384.56		Between Groups	1.38693e+06	1	1.38693e+06	3.21763	0.123008
		758.935		Within Groups	2.58624e+06	6	431041
		1334.14		Total	3.97317e+06	7
	rcd1	1916.69
		1819.44
		2477.27
		3083.22
dark	Col-0	2022.17			Sum of Squares	df	Mean Square	F	Sig.
		1367.6		Between Groups	1.41998e+06	1	1.41998e+06	7.52653	0.0253138
		1018.83		Within Groups	1.50931e+06	8	188664
		949.18		Total	2.92929e+06	9
		990.759
	rcd1	2231.79
		2361.35
		1866.58
		2293.23
		1363.86
starch flux
light	Col-0	2057.44			Sum of Squares	df	Mean Square	F	Sig.
		1225.72		Between Groups	2.05886e+06	1	2.05886e+06	10.9527	0.0162152
		973.339		Within Groups	1.12787e+06	6	187978
		982.467		Total	3.18673e+06	7
	rcd1	1999.67
		2326.16
		2182.53
		2789.04
dark	Col-0	2143.47			Sum of Squares	df	Mean Square	F	Sig.
		1089.85		Between Groups	8.0758e+06	1	8.0758e+06	14.0309	0.00565833
		771.006		Within Groups	4.6046e+06	8	575574
		856.167		Total	1.26804e+07	9
		766.447
	rcd1	1722.48
		2547.55
		3106.5
		3045.44
		4191.5
cell wall flux
light	Col-0	424.199			Sum of Squares	df	Mean Square	F	Sig.
		304.553		Between Groups	53006.7	1	53006.7	4.94833	0.0677783
		126.041		Within Groups	64272.2	6	10712
		298.052		Total	117279	7
	rcd1	439.149
		395.731
		401.917
		567.242
dark	Col-0	526.919			Sum of Squares	df	Mean Square	F	Sig.
		387.362		Between Groups	2618.93	1	2618.93	0.215643	0.654756
		241.704		Within Groups	97157.9	8	12144.7
		257.802		Total	99776.8	9
		221.352
	rcd1	398.67
		336.429
		238.619
		322.57
		177.02
