# Supplementary material for: Arabidopsis RCD1 coordinates chloroplast and mitochondrial functions through interaction with ANAC transcription factors
Source: eLife journal article supplement (doi:10.7554/elife.43284), 2019-02-15
Supplement: supp [file elife-43284-supp-v1.zip › elife_poa_e43284_Figure_4_source_data_1.xlsx]

## Sheet: Fig. 4C
Source data
	Initial	KCN	SHAM
Col-0	0.207085	0.0349327	0
	0.258009	0.0620853	0.00421801
	0.299948	0.0654974	0.0131937
	0.269412	0.0407647	-0.00664706
	0.238397	0.0525641	-0.00198718
	0.306182	0.0550455	0.00868182
	0.293115	0.0514231	0.000269231
rcd1	0.236042	0.137833	0.00458333
	0.24148	0.14976	0.0204
	0.317926	0.315372	0.0239894
	0.434712	0.353927	0.0272251
	0.385489	0.342772	0
	0.340061	0.254663	-0.0297546
	0.275495	0.218018	-0.00702703
	0.282922	0.190868	-0.00799087
	0.419326	0.373258	0.00926966
AOX-OE	0.184522	0.145174	0.0327391
	0.230696	0.217652	0.00895652
	0.192391	0.206348	0.0603478
rcd1 aox1a	0.279742	-0.00953608	-0.0203608
	0.217939	0.0125455	-0.00151515
	0.311377	0.0772065	-0.00311741
aox1a	0.22817	0.00267857	-0.0114732
	0.252343	0.0150857	-0.0170286
	0.260508	0.0140102	0.0015736
Oneway ANOVA								Oneway ANOVA								Oneway ANOVA
Untreated seedlings								KCN-treated seedlings								KCN, SHAM-treated seedlings
	Sum of Squares	df	Mean Square	F	Sig.				Sum of Squares	df	Mean Square	F	Sig.				Sum of Squares	df	Mean Square	F	Sig.
Between Groups	0.0416291	4	0.0104073	3.58432	0.0232589			Between Groups	0.278825	4	0.0697062	19.0652	1.33748e-06			Between Groups	0.00367851	4	0.000919629	3.95659	0.0159248
Within Groups	0.0580712	20	0.00290356					Within Groups	0.0731242	20	0.00365621					Within Groups	0.0046486	20	0.00023243
Total	0.0997003	24						Total	0.351949	24						Total	0.00832711	24
Post Hoc Tests								Post Hoc Tests								Post Hoc Tests
Multiple Comparisons. Bonferroni								Multiple Comparisons. Bonferroni								Multiple Comparisons. Bonferroni
		Mean Difference (I-J)	Std. Error	Sig.	95% Confidence Interval					Mean Difference (I-J)	Std. Error	Sig.	95% Confidence Interval					Mean Difference (I-J)	Std. Error	Sig.	95% Confidence Interval
					Lower Bound	Upper Bound							Lower Bound	Upper Bound							Lower Bound	Upper Bound
Col-0	rcd1	-0.0584895	0.0271553	0.436258	-0.144121	0.0271422		Col-0	rcd1	-.20785*	0.0304723	1.24729e-05	-0.30394	-0.111758		Col-0	rcd1	-0.00198902	0.00768309	1	-0.0262169	0.0222388
	AOX-OE	0.0649136	0.037184	0.962006	-0.0523424	0.18217			AOX-OE	-.13797*	0.0417259	0.0352362	-0.269544	-0.00638716			AOX-OE	-0.0314818	0.0105205	0.0719748	-0.0646572	0.0016935
	rcd1 aox1a	-0.00223624	0.037184	1	-0.119492	0.11502			rcd1 aox1a	0.0250203	0.0417259	1	-0.106558	0.156599			rcd1 aox1a	0.0108638	0.0105205	1	-0.0223116	0.0440391
	aox1a	0.0204431	0.037184	1	-0.0968128	0.137699			aox1a	0.0411675	0.0417259	1	-0.090411	0.172746			aox1a	0.0115087	0.0105205	1	-0.0216666	0.0446841
rcd1	Col-0	0.0584895	0.0271553	0.436258	-0.0271422	0.144121		rcd1	Col-0	.20785*	0.0304723	1.24729e-05	0.111758	0.30394		rcd1	Col-0	0.00198902	0.00768309	1	-0.0222388	0.0262169
	AOX-OE	.12340*	0.0359231	0.0261969	0.010123	0.236683			AOX-OE	0.0698832	0.0403111	0.983796	-0.0572337	0.197			AOX-OE	-0.0294928	0.0101638	0.0881927	-0.0615433	0.0025576
	rcd1 aox1a	0.0562532	0.0359231	1	-0.0570268	0.169533			rcd1 aox1a	.23287*	0.0403111	0.000118575	0.105752	0.359986			rcd1 aox1a	0.0128528	0.0101638	1	-0.0191976	0.0449032
	aox1a	0.0789326	0.0359231	0.399507	-0.0343474	0.192213			aox1a	.24902*	0.0403111	4.91733e-05	0.121899	0.376133			aox1a	0.0134977	0.0101638	1	-0.0185527	0.0455482
AOX-OE	Col-0	-0.0649136	0.037184	0.962006	-0.18217	0.0523424		AOX-OE	Col-0	.13797*	0.0417259	0.0352362	0.00638716	0.269544		AOX-OE	Col-0	0.0314818	0.0105205	0.0719748	-0.0016935	0.0646572
	rcd1	-.12340*	0.0359231	0.0261969	-0.236683	-0.010123			rcd1	-0.0698832	0.0403111	0.983796	-0.197	0.0572337			rcd1	0.0294928	0.0101638	0.0881927	-0.0025576	0.0615433
	rcd1 aox1a	-0.0671498	0.0439967	1	-0.205889	0.0715893			rcd1 aox1a	.16299*	0.0493708	0.0356601	0.00730022	0.318672			rcd1 aox1a	.04235*	0.012448	0.0282962	0.00309203	0.0815992
	aox1a	-0.0444705	0.0439967	1	-0.18321	0.0942686			aox1a	.17913*	0.0493708	0.0167443	0.0234474	0.334819			aox1a	.04299*	0.012448	0.0251061	0.00373696	0.0822441
rcd1 aox1a	Col-0	0.00223624	0.037184	1	-0.11502	0.119492		rcd1 aox1a	Col-0	-0.0250203	0.0417259	1	-0.156599	0.106558		rcd1 aox1a	Col-0	-0.0108638	0.0105205	1	-0.0440391	0.0223116
	rcd1	-0.0562532	0.0359231	1	-0.169533	0.0570268			rcd1	-.23287*	0.0403111	0.000118575	-0.359986	-0.105752			rcd1	-0.0128528	0.0101638	1	-0.0449032	0.0191976
	AOX-OE	0.0671498	0.0439967	1	-0.0715893	0.205889			AOX-OE	-.16299*	0.0493708	0.0356601	-0.318672	-0.00730022			AOX-OE	-.04235*	0.012448	0.0282962	-0.0815992	-0.00309203
	aox1a	0.0226794	0.0439967	1	-0.11606	0.161418			aox1a	0.0161471	0.0493708	1	-0.139539	0.171833			aox1a	0.000644932	0.012448	1	-0.0386087	0.0398985
aox1a	Col-0	-0.0204431	0.037184	1	-0.137699	0.0968128		aox1a	Col-0	-0.0411675	0.0417259	1	-0.172746	0.090411		aox1a	Col-0	-0.0115087	0.0105205	1	-0.0446841	0.0216666
	rcd1	-0.0789326	0.0359231	0.399507	-0.192213	0.0343474			rcd1	-.24902*	0.0403111	4.91733e-05	-0.376133	-0.121899			rcd1	-0.0134977	0.0101638	1	-0.0455482	0.0185527
	AOX-OE	0.0444705	0.0439967	1	-0.0942686	0.18321			AOX-OE	-.17913*	0.0493708	0.0167443	-0.334819	-0.0234474			AOX-OE	-.04299*	0.012448	0.0251061	-0.0822441	-0.00373696
	rcd1 aox1a	-0.0226794	0.0439967	1	-0.161418	0.11606			rcd1 aox1a	-0.0161471	0.0493708	1	-0.171833	0.139539			rcd1 aox1a	-0.000644932	0.012448	1	-0.0398985	0.0386087
*. The mean difference is significant at the 0.05 level.								*. The mean difference is significant at the 0.05 level.								*. The mean difference is significant at the 0.05 level.

## Sheet: Fig. 4D
Source data
	hours
	0 h	15 h
Col-0, MV	0.752823	-0.1
	0.753504	0.0558659
	0.760361	-0.0900474
	0.754121	-0.087963
	0.756497	0.233333
	0.734148	-0.092233
	0.753282	-0.0287356
	0.769359	0.111579
rcd1, MV	0.764706	0.785671
	0.759544	0.771829
	0.762254	0.775339
	0.758578	0.7408
	0.753714	0.727912
	0.750161	0.722039
Col-0, MV plus AA	0.728949	0.65528
	0.623494	0.578759
	0.709467	0.55383
	0.657383	0.489598
	0.709795	0.431985
Col-0, MV plus myx	0.691148	0.680739
	0.706578	0.465732
	0.704545	0.68813
	0.758259	0.434599
	0.726455	0.37415
	0.721756	0.269737
	0.706397	0.710197
	0.736244	0.177458
Univariate Analysis of Variance
Between-Subjects Factors
		Value Label	N
VAR00001	1.00	Col-0, MV	16
	2.00	rcd1, MV	12
	3.00	Col-0, MV-AmA	10
	4.00	Col-0, MV-Myx	16
VAR00002	1.00	0 hrs	27
	2.00	15 hrs	27
Tests of Between-Subjects Effects
Source	Type III Sum of Squares	df	Mean Square	F	Sig.
Corrected Model	3.603a	7	0.514781	54.1833	4.23654e-20
Intercept	17.8131	1	17.8131	1874.92	6.25087e-39
VAR00001	1.04649	3	0.34883	36.7162	2.88606e-12
VAR00002	1.05959	1	1.05959	111.527	6.97854e-14
VAR00001 * VAR00002	1.15208	3	0.384028	40.4209	6.0133e-13
Error	0.437033	46	0.00950072
Total	21.5965	54
Corrected Total	4.0405	53
a. R Squared = .892 (Adjusted R Squared = .875)
Post Hoc Tests
Multiple Comparisons. Bonferroni
		Mean Difference (I-J)	Std. Error	Sig.	95% Confidence Interval
					Lower Bound	Upper Bound
Col-0, MV	rcd1, MV	-.3796*	0.0372226	1.30563e-12	-0.482213	-0.276954
	Col-0, MV plus AA	-.2377*	0.0392921	1.45777e-06	-0.346085	-0.129415
	Col-0, MV plus myx	-.2212*	0.0344614	4.0632e-07	-0.316266	-0.126234
rcd1, MV	Col-0, MV	.3796*	0.0372226	1.30563e-12	0.276954	0.482213
	Col-0, MV plus AA	.1418*	0.0417349	0.00845029	0.026763	0.256904
	Col-0, MV plus myx	.1583*	0.0372226	0.000612375	0.0557041	0.260963
Col-0, MV plus AA	Col-0, MV	.2377*	0.0392921	1.45777e-06	0.129415	0.346085
	rcd1, MV	-.1418*	0.0417349	0.00845029	-0.256904	-0.026763
	Col-0, MV plus myx	0.0165	0.0392921	1	-0.0918351	0.124835
Col-0, MV plus myx	Col-0, MV	.2212*	0.0344614	4.0632e-07	0.126234	0.316266
	rcd1, MV	-.1583*	0.0372226	0.000612375	-0.260963	-0.0557041
	Col-0, MV plus AA	-0.0165	0.0392921	1	-0.124835	0.0918351
Based on observed means. The error term is Mean Square(Error) = .010.
*. The mean difference is significant at the 0.05 level.

## Sheet: Fig. 4E
Source data
	hour
	0	1	2	3	4	5	6	7	8	9
Col0, MV	0.768332	0.747855	0.722689	0.668657	0.531613	0.389291	0.288676	0.217839	0.153989	0.108
	0.760024	0.753541	0.72381	0.647691	0.506122	0.37172	0.272025	0.220736	0.161765	0.119192
	0.764866	0.758	0.715918	0.581797	0.414765	0.303797	0.23716	0.173693	0.12616	0.078
	0.763429	0.757288	0.73991	0.653486	0.502667	0.366071	0.268058	0.196864	0.140952	0.0916667
	0.749605	0.728378	0.682591	0.531469	0.390244	0.281333	0.196839	0.140351	0.0940767	0.0666667
	0.760361	0.736914	0.695578	0.546307	0.356633	0.256135	0.183673	0.127341	0.0888889	0.0433839
	0.770601	0.752803	0.721387	0.601098	0.414832	0.29597	0.208276	0.153274	0.11165	0.0702988
	0.762128	0.741254	0.697368	0.536866	0.364238	0.256374	0.182243	0.133791	0.0926276	0.0489796
rcd1, MV	0.772261	0.752591	0.750965	0.754237	0.748118	0.739224	0.723931	0.707055	0.692549	0.679681
	0.761566	0.748489	0.743647	0.750188	0.737652	0.722365	0.697674	0.67867	0.660342	0.639216
	0.766762	0.759045	0.756309	0.759913	0.759644	0.751534	0.743874	0.730364	0.723881	0.715008
	0.766296	0.744407	0.74698	0.753434	0.745505	0.737344	0.719474	0.700402	0.68325	0.664096
	0.763133	0.744485	0.739184	0.729045	0.707178	0.675135	0.635918	0.596088	0.56619	0.539106
	0.764847	0.761206	0.767319	0.7648	0.745822	0.729654	0.701	0.671548	0.646674	0.624577
	0.759095	0.748416	0.752919	0.739394	0.700535	0.65683	0.600186	0.551244	0.509886	0.479393
Col0, SHAM plus MV	0.7525	0.69527	0.613821	0.540073	0.456522	0.375423	0.306122	0.258023	0.198324	0.129283
	0.745865	0.670918	0.553145	0.430968	0.331334	0.25	0.198529	0.156436	0.120833	0.0762332
	0.760427	0.722374	0.644182	0.572797	0.507479	0.444575	0.368622	0.306122	0.260057	0.217791
	0.729441	0.650836	0.547692	0.465986	0.381378	0.315642	0.254186	0.200653	0.156415	0.112381
	0.74927	0.676558	0.599494	0.514706	0.403509	0.310263	0.24129	0.18117	0.127832	0.0642722
	0.761441	0.714098	0.66053	0.621514	0.572799	0.516284	0.447205	0.371237	0.295894	0.232349
	0.745121	0.695968	0.603941	0.514253	0.43389	0.363766	0.280702	0.219723	0.170956	0.12549
	0.711356	0.610592	0.501767	0.39852	0.304296	0.224161	0.18649	0.142857	0.0801457	0.0214592
rcd1, SHAM plus MV	0.733739	0.699755	0.661191	0.612903	0.564241	0.526112	0.487448	0.453735	0.404481	0.346106
	0.748606	0.691339	0.628159	0.549163	0.479469	0.417568	0.359765	0.304625	0.244681	0.174257
	0.741158	0.706003	0.671687	0.618842	0.565517	0.519084	0.491841	0.454318	0.421477	0.385164
	0.733988	0.693681	0.646662	0.591222	0.535961	0.489796	0.446387	0.399249	0.346667	0.282759
	0.726179	0.677827	0.640112	0.611872	0.570603	0.524025	0.487562	0.446831	0.418472	0.393758
	0.727794	0.680372	0.634961	0.57449	0.516802	0.468112	0.409348	0.365297	0.311582	0.252144
	0.73337	0.704372	0.669447	0.633245	0.598049	0.564482	0.525346	0.481572	0.44026	0.390541
	0.738019	0.709371	0.680439	0.640208	0.603633	0.561717	0.52451	0.469619	0.420824	0.371134
Oneway ANOVA
		Sum of Squares	df	Mean Square	F	Sig.
0 hrs	Between Groups	0.00441204	3	0.00147068	13.8892	1.14177e-05
	Within Groups	0.00285893	27	0.000105886
	Total	0.00727097	30
1 hr	Between Groups	0.0298887	3	0.0099629	23.7003	1.00209e-07
	Within Groups	0.01135	27	0.00042037
	Total	0.0412387	30
2 hrs	Between Groups	0.115244	3	0.0384147	41.6366	2.89807e-10
	Within Groups	0.0249107	27	0.000922619
	Total	0.140155	30
3 hrs	Between Groups	0.22246	3	0.0741534	30.7971	7.28312e-09
	Within Groups	0.0650107	27	0.0024078
	Total	0.287471	30
4 hrs	Between Groups	0.471907	3	0.157302	40.4953	3.93342e-10
	Within Groups	0.10488	27	0.00388446
	Total	0.576787	30
5 hrs	Between Groups	0.743156	3	0.247719	61.1272	3.66915e-12
	Within Groups	0.109418	27	0.00405251
	Total	0.852574	30
6 hrs	Between Groups	0.951364	3	0.317121	80.6064	1.36072e-13
	Within Groups	0.106223	27	0.00393419
	Total	1.05759	30
7 hrs	Between Groups	1.09599	3	0.36533	93.9148	2.11241e-14
	Within Groups	0.10503	27	0.00389001
	Total	1.20102	30
8 hrs	Between Groups	1.22333	3	0.407778	99.7735	1.00277e-14
	Within Groups	0.11035	27	0.00408704
	Total	1.33368	30
9 hrs	Between Groups	1.34634	3	0.448781	92.1977	2.64908e-14
	Within Groups	0.131425	27	0.00486759
	Total	1.47777	30
Post Hoc Tests
Multiple Comparisons. Bonferroni
Dependent Variable			Mean Difference (I-J)	Std. Error	Sig.	95% Confidence Interval
						Lower Bound	Upper Bound
0 hrs	Col0, MV	rcd1, MV	-0.00303571	0.00532563	1	-0.0181973	0.0121258
		Col0, SHAM plus MV	.01625*	0.00514505	0.0233002	0.00160256	0.0308974
		rcd1, SHAM plus MV	.02625*	0.00514505	0.000138942	0.0116026	0.0408974
	rcd1, MV	Col0, MV	0.00303571	0.00532563	1	-0.0121258	0.0181973
		Col0, SHAM plus MV	.01929*	0.00532563	0.00716521	0.00412417	0.0344473
		rcd1, SHAM plus MV	.02929*	0.00532563	4.79712e-05	0.0141242	0.0444473
	Col0, SHAM plus MV	Col0, MV	-.01625*	0.00514505	0.0233002	-0.0308974	-0.00160256
		rcd1, MV	-.01929*	0.00532563	0.00716521	-0.0344473	-0.00412417
		rcd1, SHAM plus MV	0.01	0.00514505	0.374597	-0.00464744	0.0246474
	rcd1, SHAM plus MV	Col0, MV	-.02625*	0.00514505	0.000138942	-0.0408974	-0.0116026
		rcd1, MV	-.02929*	0.00532563	4.79712e-05	-0.0444473	-0.0141242
		Col0, SHAM plus MV	-0.01	0.00514505	0.374597	-0.0246474	0.00464744
1 hr	Col0, MV	rcd1, MV	-0.0025	0.0106113	1	-0.0327092	0.0277092
		Col0, SHAM plus MV	.06750*	0.0102515	2.76424e-06	0.0383151	0.0966849
		rcd1, SHAM plus MV	.05250*	0.0102515	0.00013195	0.0233151	0.0816849
	rcd1, MV	Col0, MV	0.0025	0.0106113	1	-0.0277092	0.0327092
		Col0, SHAM plus MV	.07000*	0.0106113	2.67772e-06	0.0397908	0.100209
		rcd1, SHAM plus MV	.05500*	0.0106113	0.000111738	0.0247908	0.0852092
	Col0, SHAM plus MV	Col0, MV	-.06750*	0.0102515	2.76424e-06	-0.0966849	-0.0383151
		rcd1, MV	-.07000*	0.0106113	2.67772e-06	-0.100209	-0.0397908
		rcd1, SHAM plus MV	-0.015	0.0102515	0.929738	-0.0441849	0.0141849
	rcd1, SHAM plus MV	Col0, MV	-.05250*	0.0102515	0.00013195	-0.0816849	-0.0233151
		rcd1, MV	-.05500*	0.0106113	0.000111738	-0.0852092	-0.0247908
		Col0, SHAM plus MV	0.015	0.0102515	0.929738	-0.0141849	0.0441849
2 hrs	Col0, MV	rcd1, MV	-0.0389286	0.0157204	0.119009	-0.0836829	0.00582573
		Col0, SHAM plus MV	.12375*	0.0151873	5.65839e-08	0.0805132	0.166987
		rcd1, SHAM plus MV	.05875*	0.0151873	0.00375783	0.0155132	0.101987
	rcd1, MV	Col0, MV	0.0389286	0.0157204	0.119009	-0.00582573	0.0836829
		Col0, SHAM plus MV	.16268*	0.0157204	4.0665e-10	0.117924	0.207433
		rcd1, SHAM plus MV	.09768*	0.0157204	7.24628e-06	0.0529243	0.142433
	Col0, SHAM plus MV	Col0, MV	-.12375*	0.0151873	5.65839e-08	-0.166987	-0.0805132
		rcd1, MV	-.16268*	0.0157204	4.0665e-10	-0.207433	-0.117924
		rcd1, SHAM plus MV	-.06500*	0.0151873	0.00126182	-0.108237	-0.0217632
	rcd1, SHAM plus MV	Col0, MV	-.05875*	0.0151873	0.00375783	-0.101987	-0.0155132
		rcd1, MV	-.09768*	0.0157204	7.24628e-06	-0.142433	-0.0529243
		Col0, SHAM plus MV	.06500*	0.0151873	0.00126182	0.0217632	0.108237
3 hrs	Col0, MV	rcd1, MV	-.15232*	0.0253958	1.27645e-05	-0.224621	-0.0800221
		Col0, SHAM plus MV	.09000*	0.0245347	0.00634227	0.0201522	0.159848
		rcd1, SHAM plus MV	-0.00625	0.0245347	1	-0.0760978	0.0635978
	rcd1, MV	Col0, MV	.15232*	0.0253958	1.27645e-05	0.0800221	0.224621
		Col0, SHAM plus MV	.24232*	0.0253958	2.3077e-09	0.170022	0.314621
		rcd1, SHAM plus MV	.14607*	0.0253958	2.44741e-05	0.0737721	0.218371
	Col0, SHAM plus MV	Col0, MV	-.09000*	0.0245347	0.00634227	-0.159848	-0.0201522
		rcd1, MV	-.24232*	0.0253958	2.3077e-09	-0.314621	-0.170022
		rcd1, SHAM plus MV	-.09625*	0.0245347	0.00325409	-0.166098	-0.0264022
	rcd1, SHAM plus MV	Col0, MV	0.00625	0.0245347	1	-0.0635978	0.0760978
		rcd1, MV	-.14607*	0.0253958	2.44741e-05	-0.218371	-0.0737721
		Col0, SHAM plus MV	.09625*	0.0245347	0.00325409	0.0264022	0.166098
4 hrs	Col0, MV	rcd1, MV	-.30339*	0.0322565	3.11915e-09	-0.395224	-0.211562
		Col0, SHAM plus MV	0.01125	0.0311627	1	-0.0774671	0.0999671
		rcd1, SHAM plus MV	-.12125*	0.0311627	0.00354172	-0.209967	-0.0325329
	rcd1, MV	Col0, MV	.30339*	0.0322565	3.11915e-09	0.211562	0.395224
		Col0, SHAM plus MV	.31464*	0.0322565	1.44842e-09	0.222812	0.406474
		rcd1, SHAM plus MV	.18214*	0.0322565	3.2359e-05	0.090312	0.273974
	Col0, SHAM plus MV	Col0, MV	-0.01125	0.0311627	1	-0.0999671	0.0774671
		rcd1, MV	-.31464*	0.0322565	1.44842e-09	-0.406474	-0.222812
		rcd1, SHAM plus MV	-.13250*	0.0311627	0.00135975	-0.221217	-0.0437829
	rcd1, SHAM plus MV	Col0, MV	.12125*	0.0311627	0.00354172	0.0325329	0.209967
		rcd1, MV	-.18214*	0.0322565	3.2359e-05	-0.273974	-0.090312
		Col0, SHAM plus MV	.13250*	0.0311627	0.00135975	0.0437829	0.221217
5 hrs	Col0, MV	rcd1, MV	-.40089*	0.0329468	1.08283e-11	-0.494689	-0.307097
		Col0, SHAM plus MV	-0.03375	0.0318297	1	-0.124366	0.0568658
		rcd1, SHAM plus MV	-.19250*	0.0318297	1.11922e-05	-0.283116	-0.101884
	rcd1, MV	Col0, MV	.40089*	0.0329468	1.08283e-11	0.307097	0.494689
		Col0, SHAM plus MV	.36714*	0.0329468	7.94783e-11	0.273347	0.460939
		rcd1, SHAM plus MV	.20839*	0.0329468	5.41429e-06	0.114597	0.302189
	Col0, SHAM plus MV	Col0, MV	0.03375	0.0318297	1	-0.0568658	0.124366
		rcd1, MV	-.36714*	0.0329468	7.94783e-11	-0.460939	-0.273347
		rcd1, SHAM plus MV	-.15875*	0.0318297	0.000188985	-0.249366	-0.0681342
	rcd1, SHAM plus MV	Col0, MV	.19250*	0.0318297	1.11922e-05	0.101884	0.283116
		rcd1, MV	-.20839*	0.0329468	5.41429e-06	-0.302189	-0.114597
		Col0, SHAM plus MV	.15875*	0.0318297	0.000188985	0.0681342	0.249366
6 hrs	Col0, MV	rcd1, MV	-.45857*	0.0324623	3.27037e-13	-0.550988	-0.366155
		Col0, SHAM plus MV	-0.05625	0.0313616	0.504518	-0.145533	0.0330332
		rcd1, SHAM plus MV	-.23750*	0.0313616	2.28371e-07	-0.326783	-0.148217
	rcd1, MV	Col0, MV	.45857*	0.0324623	3.27037e-13	0.366155	0.550988
		Col0, SHAM plus MV	.40232*	0.0324623	7.09122e-12	0.309905	0.494738
		rcd1, SHAM plus MV	.22107*	0.0324623	1.54879e-06	0.128655	0.313488
	Col0, SHAM plus MV	Col0, MV	0.05625	0.0313616	0.504518	-0.0330332	0.145533
		rcd1, MV	-.40232*	0.0324623	7.09122e-12	-0.494738	-0.309905
		rcd1, SHAM plus MV	-.18125*	0.0313616	2.27474e-05	-0.270533	-0.0919668
	rcd1, SHAM plus MV	Col0, MV	.23750*	0.0313616	2.28371e-07	0.148217	0.326783
		rcd1, MV	-.22107*	0.0324623	1.54879e-06	-0.313488	-0.128655
		Col0, SHAM plus MV	.18125*	0.0313616	2.27474e-05	0.0919668	0.270533
7 hrs	Col0, MV	rcd1, MV	-.49286*	0.0322795	5.02264e-14	-0.584754	-0.400961
		Col0, SHAM plus MV	-0.06	0.031185	0.38973	-0.14878	0.0287805
		rcd1, SHAM plus MV	-.25125*	0.031185	7.04372e-08	-0.34003	-0.16247
	rcd1, MV	Col0, MV	.49286*	0.0322795	5.02264e-14	0.400961	0.584754
		Col0, SHAM plus MV	.43286*	0.0322795	1.12588e-12	0.340961	0.524754
		rcd1, SHAM plus MV	.24161*	0.0322795	2.8385e-07	0.149711	0.333504
	Col0, SHAM plus MV	Col0, MV	0.06	0.031185	0.38973	-0.0287805	0.14878
		rcd1, MV	-.43286*	0.0322795	1.12588e-12	-0.524754	-0.340961
		rcd1, SHAM plus MV	-.19125*	0.031185	8.95343e-06	-0.28003	-0.10247
	rcd1, SHAM plus MV	Col0, MV	.25125*	0.031185	7.04372e-08	0.16247	0.34003
		rcd1, MV	-.24161*	0.0322795	2.8385e-07	-0.333504	-0.149711
		Col0, SHAM plus MV	.19125*	0.031185	8.95343e-06	0.10247	0.28003
8 hrs	Col0, MV	rcd1, MV	-.52000*	0.0330869	2.48368e-14	-0.614195	-0.425805
		Col0, SHAM plus MV	-0.0575	0.031965	0.499392	-0.148501	0.033501
		rcd1, SHAM plus MV	-.25500*	0.031965	8.52333e-08	-0.346001	-0.163999
	rcd1, MV	Col0, MV	.52000*	0.0330869	2.48368e-14	0.425805	0.614195
		Col0, SHAM plus MV	.46250*	0.0330869	4.20428e-13	0.368305	0.556695
		rcd1, SHAM plus MV	.26500*	0.0330869	7.89627e-08	0.170805	0.359195
	Col0, SHAM plus MV	Col0, MV	0.0575	0.031965	0.499392	-0.033501	0.148501
		rcd1, MV	-.46250*	0.0330869	4.20428e-13	-0.556695	-0.368305
		rcd1, SHAM plus MV	-.19750*	0.031965	7.93877e-06	-0.288501	-0.106499
	rcd1, SHAM plus MV	Col0, MV	.25500*	0.031965	8.52333e-08	0.163999	0.346001
		rcd1, MV	-.26500*	0.0330869	7.89627e-08	-0.359195	-0.170805
		Col0, SHAM plus MV	.19750*	0.031965	7.93877e-06	0.106499	0.288501
9 hrs	Col0, MV	rcd1, MV	-.54125*	0.0361084	7.85295e-14	-0.644047	-0.438453
		Col0, SHAM plus MV	-0.04375	0.0348841	1	-0.143061	0.0555614
		rcd1, SHAM plus MV	-.24500*	0.0348841	9.00813e-07	-0.344311	-0.145689
	rcd1, MV	Col0, MV	.54125*	0.0361084	7.85295e-14	0.438453	0.644047
		Col0, SHAM plus MV	.49750*	0.0361084	5.92807e-13	0.394703	0.600297
		rcd1, SHAM plus MV	.29625*	0.0361084	4.9487e-08	0.193453	0.399047
	Col0, SHAM plus MV	Col0, MV	0.04375	0.0348841	1	-0.0555614	0.143061
		rcd1, MV	-.49750*	0.0361084	5.92807e-13	-0.600297	-0.394703
		rcd1, SHAM plus MV	-.20125*	0.0348841	2.33748e-05	-0.300561	-0.101939
	rcd1, SHAM plus MV	Col0, MV	.24500*	0.0348841	9.00813e-07	0.145689	0.344311
		rcd1, MV	-.29625*	0.0361084	4.9487e-08	-0.399047	-0.193453
		Col0, SHAM plus MV	.20125*	0.0348841	2.33748e-05	0.101939	0.300561
*. The mean difference is significant at the 0.05 level.

## Sheet: Fig. 4 - figure supplement 1B
Source data
Col-0, DMSO	1
	1
	1
Col-0, AA	2.53967
	2.52371
	2.52447
Col-0, myx	2.52227
	2.44479
	2.32398
rcd1, DMSO	14.362
	12.7706
	11.1429
rcd1, AA	19.6623
	18.6394
	16.8064
rcd1, myx	19.3716
	16.9538
	17.3117
rcd1 aox1a, DMSO	0.391233
	0.360339
	0.304073
rcd1 aox1a, AA	1.0458
	0.941818
	0.747941
rcd1 aox1a, myx	0.871547
	0.809371
	0.724391
Univariate Analysis of Variance
Between-Subjects Factors
		Value Label	N
VAR00001	1.00	Col-0	9
	2.00	rcd1	9
	3.00	rcd1 aox1a	9
VAR00002	1.00	DMSO	9
	2.00	AA	9
	3.00	myx	9
Tests of Between-Subjects Effects
Dependent Variable:	VAR00003
Source	Type III Sum of Squares	df	Mean Square	F	Sig.
Corrected Model	1420.108a	8	177.514	248.552	8.08215e-17
Intercept	1084.22	1	1084.22	1518.11	7.76671e-19
VAR00001	1357.24	2	678.622	950.196	5.63658e-19
VAR00002	36.2641	2	18.132	25.3882	5.76095e-06
VAR00001 * VAR00002	26.6009	4	6.65023	9.31155	0.00029242
Error	12.8554	18	0.714191
Total	2517.18	27
Corrected Total	1432.96	26
a. R Squared = .991 (Adjusted R Squared = .987)
Post Hoc Tests
Multiple Comparisons. Bonferroni
(I) VAR00001		Mean Difference (I-J)	Std. Error	Sig.	95% Confidence Interval
					Lower Bound	Upper Bound
Col-0	rcd1	-14.3491*	0.398383	9.42447e-18	-15.4005	-13.2977
	rcd1 aox1a	1.2980*	0.398383	0.0130952	0.246652	2.34943
rcd1	Col-0	14.3491*	0.398383	9.42447e-18	13.2977	15.4005
	rcd1 aox1a	15.6471*	0.398383	2.02004e-18	14.5957	16.6985
rcd1 aox1a	Col-0	-1.2980*	0.398383	0.0130952	-2.34943	-0.246652
	rcd1	-15.6471*	0.398383	2.02004e-18	-16.6985	-14.5957
Based on observed means. The error term is Mean Square(Error) = .714.
*. The mean difference is significant at the 0.05 level.
(I) VAR00002		Mean Difference (I-J)	Std. Error	Sig.	95% Confidence Interval
					Lower Bound	Upper Bound
DMSO	AA	-2.5667*	0.398383	1.38279e-05	-3.61811	-1.51532
	myx	-2.3336*	0.398383	4.53117e-05	-3.38498	-1.2822
AA	DMSO	2.5667*	0.398383	1.38279e-05	1.51532	3.61811
	myx	0.233121	0.398383	1	-0.81827	1.28451
myx	DMSO	2.3336*	0.398383	4.53117e-05	1.2822	3.38498
	AA	-0.233121	0.398383	1	-1.28451	0.81827
Based on observed means. The error term is Mean Square(Error) = .714.
*. The mean difference is significant at the 0.05 level.

## Sheet: Fig. 4 - figure supplement 3A
Source data
	hour
	0	15
pgr5, AA	0.754183	0.693659
	0.762126	0.735219
	0.760024	0.755823
	0.741935	0.677106
	0.759804	0.70872
	0.761658	0.728608
	0.762404	0.746825
	0.748718	0.656648
	0.762788	0.732866
	0.746089	0.686258
	0.758983	0.722892
	0.757393	0.747755
	0.755979	0.76555
	0.756018	0.74184
	0.751424	0.706596
gl1, AA	0.744457	0.747316
	0.75541	0.748768
	0.737515	0.729776
	0.737943	0.725021
	0.75591	0.746489
	0.7463	0.733433
	0.737192	0.739394
	0.735652	0.743775
	0.757451	0.753109
	0.724574	0.716205
	0.759305	0.753229
	0.753955	0.756579
	0.751193	0.737245
	0.75921	0.759336
	0.722371	0.715257
	0.757729	0.766722
pgr5, MV	0.757684	0.0484848
	0.739863	0.0139665
	0.768197	0.269297
	0.757917	0
	0.766573	0.0686869
	0.7745	0.0772277
	0.760201	0.0154321
	0.75576	-0.0457317
	0.763193	0.143382
	0.755611	0.347759
	0.765184	0.172232
	0.761566	0.0377834
	0.773154	0.0503778
	0.7795	0.0236967
	0.774225	0.0728155
gl1, MV	0.766646	0.100917
	0.772222	0.302285
	0.771595	-0.0129199
	0.771792	0.0728155
	0.776256	0.33612
	0.773142	0
	0.768091	0.0536193
	0.787353	-0.0425532
	0.775435	0
	0.772111	-0.044586
	0.772076	-0.0510204
	0.753785	-0.0392157
	0.780071	0.0147929
	0.777363	0.013089
	0.77683	0.0164474
pgr5, AA plus MV	0.724928	0.252144
	0.745035	0.392465
	0.731694	0.505338
	0.742574	0.724585
	0.756715	0.293497
	0.724003	0.489301
	0.746487	0.651905
	0.744457	0.405136
	0.738148	0.434599
	0.752975	0.712187
	0.765051	0.333333
	0.743777	0.574667
	0.755114	0.439469
	0.746579	0.554893
	0.742142	0.421585
gl1, AA plus MV	0.75591	0.487417
	0.74822	0.316212
	0.742286	0.47018
	0.749664	0.599138
	0.756579	0.388401
	0.734653	0.419003
	0.749068	0.319039
	0.729205	0.466555
	0.745005	0.526253
	0.760859	0.268446
	0.757729	0.394737
	0.743623	0.518127
	0.724138	0.538647
	0.744552	0.504532
	0.758658	0.431548
	0.752084	0.39644
Univariate Analysis of Variance
Between-Subjects Factors
		Value Label	N
VAR00001	1.00	pgr5, AmA	30
	2.00	gl1, AmA	32
	3.00	pgr5, MV	30
	4.00	gl1, MV	30
	5.00	pgr5, AmA+MV	30
	6.00	gl1, AmA+MV	32
VAR00002	1.00	0 hrs	92
	2.00	15 hrs	92
Tests of Between-Subjects Effects
Source	Type III Sum of Squares	df	Mean Square	F	Sig.
Corrected Model	11.886a	11	1.08055	235.253	1.83516e-97
Intercept	63.3699	1	63.3699	13796.6	3.61843e-166
VAR00001	3.21578	5	0.643157	140.025	1.02776e-58
VAR00002	5.17529	1	5.17529	1126.74	2.0255e-77
VAR00001 * VAR00002	3.61044	5	0.722087	157.21	3.28396e-62
Error	0.790022	172	0.00459315
Total	76.4889	184
Corrected Total	12.6761	183
a. R Squared = .938 (Adjusted R Squared = .934)
Post Hoc Tests
Multiple Comparisons. Bonferroni
		Mean Difference (I-J)	Std. Error	Sig.	95% Confidence Interval
					Lower Bound	Upper Bound
pgr5, AA	gl1, AA	-0.00579809	0.0172233	1	-0.0570676	0.0454714
	pgr5, MV	.3132*	0.0174989	5.81501e-40	0.261155	0.365335
	gl1, MV	.3277*	0.0174989	3.38278e-42	0.275621	0.379801
	pgr5, AA plus MV	.1267*	0.0174989	2.14033e-10	0.0746137	0.178793
	gl1, AA plus MV	.1445*	0.0172233	2.52963e-13	0.0932734	0.195812
gl1, AA	pgr5, AA	0.00579809	0.0172233	1	-0.0454714	0.0570676
	pgr5, MV	.3190*	0.0172233	1.1932e-41	0.267774	0.370313
	gl1, MV	.3335*	0.0172233	6.78911e-44	0.28224	0.384779
	pgr5, AA plus MV	.1325*	0.0172233	1.59756e-11	0.0812322	0.183771
	gl1, AA plus MV	.1503*	0.0169432	1.34565e-14	0.0999052	0.200777
pgr5, MV	pgr5, AA	-.3132*	0.0174989	5.81501e-40	-0.365335	-0.261155
	gl1, AA	-.3190*	0.0172233	1.1932e-41	-0.370313	-0.267774
	gl1, MV	0.0144659	0.0174989	1	-0.0376239	0.0665557
	pgr5, AA plus MV	-.1865*	0.0174989	1.62588e-19	-0.238631	-0.134452
	gl1, AA plus MV	-.1687*	0.0172233	4.18975e-17	-0.219972	-0.117433
gl1, MV	pgr5, AA	-.3277*	0.0174989	3.38278e-42	-0.379801	-0.275621
	gl1, AA	-.3335*	0.0172233	6.78911e-44	-0.384779	-0.28224
	pgr5, MV	-0.0144659	0.0174989	1	-0.0665557	0.0376239
	pgr5, AA plus MV	-.2010*	0.0174989	7.45225e-22	-0.253097	-0.148918
	gl1, AA plus MV	-.1832*	0.0172233	1.91506e-19	-0.234438	-0.131899
pgr5, AA plus MV	pgr5, AA	-.1267*	0.0174989	2.14033e-10	-0.178793	-0.0746137
	gl1, AA	-.1325*	0.0172233	1.59756e-11	-0.183771	-0.0812322
	pgr5, MV	.1865*	0.0174989	1.62588e-19	0.134452	0.238631
	gl1, MV	.2010*	0.0174989	7.45225e-22	0.148918	0.253097
	gl1, AA plus MV	0.0178393	0.0172233	1	-0.0334301	0.0691088
gl1, AA plus MV	pgr5, AA	-.1445*	0.0172233	2.52963e-13	-0.195812	-0.0932734
	gl1, AA	-.1503*	0.0169432	1.34565e-14	-0.200777	-0.0999052
	pgr5, MV	.1687*	0.0172233	4.18975e-17	0.117433	0.219972
	gl1, MV	.1832*	0.0172233	1.91506e-19	0.131899	0.234438
	pgr5, AA plus MV	-0.0178393	0.0172233	1	-0.0691088	0.0334301
Based on observed means. The error term is Mean Square(Error) = .005.
*. The mean difference is significant at the 0.05 level.

## Sheet: Fig. 4 - figure supplement 3B
Source data
	hour
	0	1	2	3	4	5	6	7	8	9
Col-0, DMSO	0.778561	0.788241	0.788451	0.787303	0.786143	0.787246	0.78766	0.787068	0.788083	0.780737
	0.783415	0.787822	0.792798	0.78964	0.788437	0.790281	0.792839	0.791506	0.794061	0.787565
	0.779164	0.79291	0.792892	0.7911	0.797281	0.797281	0.79902	0.792256	0.794153	0.797199
	0.78716	0.794942	0.796573	0.79057	0.795952	0.798246	0.798246	0.798246	0.80044	0.797691
	0.78	0.786639	0.783954	0.786015	0.788644	0.789054	0.79071	0.787473	0.78902	0.788451
	0.777114	0.786329	0.78488	0.784497	0.788248	0.788677	0.789266	0.785185	0.782709	0.782081
	0.783186	0.7915	0.792443	0.790977	0.794514	0.799012	0.799409	0.796543	0.796543	0.796944
	0.783954	0.790629	0.785018	0.789828	0.788663	0.786026	0.788973	0.78526	0.783194	0.780377
rcd1, DMSO	0.775671	0.780947	0.779443	0.782702	0.783165	0.784219	0.785173	0.785558	0.787246	0.782705
	0.785714	0.79886	0.797167	0.795429	0.800573	0.800573	0.801143	0.8	0.802305	0.801159
	0.779652	0.797199	0.797199	0.794778	0.797814	0.799639	0.799526	0.79656	0.800708	0.798354
	0.775435	0.792999	0.794241	0.791743	0.794778	0.794778	0.799034	0.7954	0.797814	0.7954
	0.78233	0.790977	0.788826	0.789773	0.792355	0.790297	0.794442	0.789613	0.790722	0.789198
	0.767519	0.777837	0.779289	0.777543	0.780757	0.781904	0.784607	0.783145	0.784804	0.783866
	0.764758	0.779598	0.780757	0.781332	0.781904	0.788241	0.783489	0.780437	0.785081	0.782473
	0.770399	0.783316	0.78539	0.78806	0.789109	0.78963	0.793036	0.792094	0.792094	0.789139
Col0, SHAM	0.759204	0.756911	0.746867	0.745057	0.742351	0.738148	0.731638	0.724638	0.717813	0.713604
	0.745178	0.726216	0.705238	0.699005	0.690579	0.690116	0.683287	0.681034	0.679208	0.667005
	0.733744	0.711186	0.697168	0.68813	0.682591	0.677769	0.666957	0.652095	0.644004	0.628571
	0.759007	0.740909	0.734442	0.724984	0.71505	0.697924	0.685045	0.677873	0.6784	0.669408
	0.762555	0.754601	0.741658	0.739519	0.732708	0.722803	0.718929	0.709868	0.698328	0.691639
	0.76337	0.757643	0.754467	0.754127	0.754375	0.751545	0.746164	0.737954	0.735135	0.730116
	0.753932	0.731104	0.712089	0.71134	0.708174	0.699194	0.691327	0.679329	0.672383	0.663312
	0.737253	0.730532	0.721387	0.721424	0.719831	0.71345	0.709285	0.701976	0.694513	0.696867
rcd1, SHAM	0.749193	0.739637	0.72545	0.718135	0.710387	0.708655	0.705138	0.700813	0.693929	0.684896
	0.749866	0.734448	0.717105	0.707055	0.702789	0.697368	0.695578	0.690893	0.690433	0.677632
	0.766015	0.753247	0.736571	0.730907	0.722637	0.714846	0.703984	0.688133	0.6828	0.668206
	0.755506	0.74026	0.733294	0.728856	0.728589	0.715776	0.699518	0.695061	0.686944	0.681436
	0.749864	0.746934	0.736733	0.736578	0.733676	0.727682	0.719474	0.71245	0.70903	0.697917
	0.750397	0.733115	0.718839	0.716114	0.706773	0.70148	0.692633	0.682137	0.675431	0.663534
	0.747259	0.734681	0.723317	0.723359	0.720981	0.723404	0.716114	0.711994	0.709502	0.702789
	0.728458	0.693351	0.671458	0.663012	0.660578	0.654118	0.652419	0.652789	0.646958	0.645161
Oneway ANOVA
		Sum of Squares	df	Mean Square	F	Sig.
0 hrs	Between Groups	0.00632179	3	0.00210726	27.4086	1.76336e-08
	Within Groups	0.00215273	28	7.68832e-05
	Total	0.00847452	31
1 hr	Between Groups	0.0219276	3	0.00730921	42.6759	1.42056e-10
	Within Groups	0.00479563	28	0.000171273
	Total	0.0267233	31
2 hrs	Between Groups	0.0341841	3	0.0113947	47.3123	4.33309e-11
	Within Groups	0.00674352	28	0.00024084
	Total	0.0409276	31
3 hrs	Between Groups	0.0382927	3	0.0127642	46.0536	5.92288e-11
	Within Groups	0.0077605	28	0.000277161
	Total	0.0460532	31
4 hrs	Between Groups	0.0464512	3	0.0154837	51.2617	1.69656e-11
	Within Groups	0.00845747	28	0.000302053
	Total	0.0549087	31
5 hrs	Between Groups	0.0554913	3	0.0184971	60.0143	2.59301e-12
	Within Groups	0.00862993	28	0.000308212
	Total	0.0641212	31
6 hrs	Between Groups	0.0675882	3	0.0225294	73.0105	2.36745e-13
	Within Groups	0.00864018	28	0.000308578
	Total	0.0762284	31
7 hrs	Between Groups	0.0748756	3	0.0249585	80.9608	6.54836e-14
	Within Groups	0.00863182	28	0.000308279
	Total	0.0835074	31
8 hrs	Between Groups	0.0855567	3	0.0285189	88.7076	2.07725e-14
	Within Groups	0.00900182	28	0.000321494
	Total	0.0945585	31
9 hrs	Between Groups	0.0959421	3	0.0319807	85.8018	3.16058e-14
	Within Groups	0.0104364	28	0.000372727
	Total	0.106378	31
Post Hoc Tests
Multiple Comparisons. Bonferroni
Dependent Variable			Mean Difference (I-J)	Std. Error	Sig.	95% Confidence Interval
						Lower Bound	Upper Bound
0 hrs	Col-0, DMSO	rcd1, DMSO	0.00638462	0.00438415	0.938604	-0.0060617	0.0188309
		Col0, SHAM	.02979*	0.00438415	1.33159e-06	0.0173426	0.0422353
		rcd1, SHAM	.03200*	0.00438415	3.61332e-07	0.0195533	0.0444459
	rcd1, DMSO	Col-0, DMSO	-0.00638462	0.00438415	0.938604	-0.0188309	0.0060617
		Col0, SHAM	.02340*	0.00438415	6.60194e-05	0.010958	0.0358507
		rcd1, SHAM	.02561*	0.00438415	1.67835e-05	0.0131686	0.0380613
	Col0, SHAM	Col-0, DMSO	-.02979*	0.00438415	1.33159e-06	-0.0422353	-0.0173426
		rcd1, DMSO	-.02340*	0.00438415	6.60194e-05	-0.0358507	-0.010958
		rcd1, SHAM	0.00221062	0.00438415	1	-0.0102357	0.0146569
	rcd1, SHAM	Col-0, DMSO	-.03200*	0.00438415	3.61332e-07	-0.0444459	-0.0195533
		rcd1, DMSO	-.02561*	0.00438415	1.67835e-05	-0.0380613	-0.0131686
		Col0, SHAM	-0.00221062	0.00438415	1	-0.0146569	0.0102357
1 hr	Col-0, DMSO	rcd1, DMSO	0.00215979	0.00654356	1	-0.0164169	0.0207365
		Col0, SHAM	.05124*	0.00654356	9.44425e-08	0.032662	0.0698155
		rcd1, SHAM	.05542*	0.00654356	1.97553e-08	0.036841	0.0739944
	rcd1, DMSO	Col-0, DMSO	-0.00215979	0.00654356	1	-0.0207365	0.0164169
		Col0, SHAM	.04908*	0.00654356	2.16402e-07	0.0305023	0.0676557
		rcd1, SHAM	.05326*	0.00654356	4.40535e-08	0.0346812	0.0718346
	Col0, SHAM	Col-0, DMSO	-.05124*	0.00654356	9.44425e-08	-0.0698155	-0.032662
		rcd1, DMSO	-.04908*	0.00654356	2.16402e-07	-0.0676557	-0.0305023
		rcd1, SHAM	0.00417894	0.00654356	1	-0.0143978	0.0227557
	rcd1, SHAM	Col-0, DMSO	-.05542*	0.00654356	1.97553e-08	-0.0739944	-0.036841
		rcd1, DMSO	-.05326*	0.00654356	4.40535e-08	-0.0718346	-0.0346812
		Col0, SHAM	-0.00417894	0.00654356	1	-0.0227557	0.0143978
2 hrs	Col-0, DMSO	rcd1, DMSO	0.00183723	0.00775951	1	-0.0201915	0.023866
		Col0, SHAM	.06296*	0.00775951	4.68214e-08	0.040933	0.0849905
		rcd1, SHAM	.06928*	0.00775951	6.62626e-09	0.0472517	0.0913091
	rcd1, DMSO	Col-0, DMSO	-0.00183723	0.00775951	1	-0.023866	0.0201915
		Col0, SHAM	.06112*	0.00775951	8.40281e-08	0.0390958	0.0831533
		rcd1, SHAM	.06744*	0.00775951	1.15949e-08	0.0454144	0.0894719
	Col0, SHAM	Col-0, DMSO	-.06296*	0.00775951	4.68214e-08	-0.0849905	-0.040933
		rcd1, DMSO	-.06112*	0.00775951	8.40281e-08	-0.0831533	-0.0390958
		rcd1, SHAM	0.00631863	0.00775951	1	-0.0157101	0.0283473
	rcd1, SHAM	Col-0, DMSO	-.06928*	0.00775951	6.62626e-09	-0.0913091	-0.0472517
		rcd1, DMSO	-.06744*	0.00775951	1.15949e-08	-0.0894719	-0.0454144
		Col0, SHAM	-0.00631863	0.00775951	1	-0.0283473	0.0157101
3 hrs	Col-0, DMSO	rcd1, DMSO	0.00107152	0.00832407	1	-0.02256	0.024703
		Col0, SHAM	.06579*	0.00832407	7.86613e-08	0.0421615	0.0894245
		rcd1, SHAM	.07324*	0.00832407	9.00014e-09	0.0496078	0.0968707
	rcd1, DMSO	Col-0, DMSO	-0.00107152	0.00832407	1	-0.024703	0.02256
		Col0, SHAM	.06472*	0.00832407	1.08384e-07	0.04109	0.088353
		rcd1, SHAM	.07217*	0.00832407	1.22158e-08	0.0485362	0.0957992
	Col0, SHAM	Col-0, DMSO	-.06579*	0.00832407	7.86613e-08	-0.0894245	-0.0421615
		rcd1, DMSO	-.06472*	0.00832407	1.08384e-07	-0.088353	-0.04109
		rcd1, SHAM	0.00744623	0.00832407	1	-0.0161852	0.0310777
	rcd1, SHAM	Col-0, DMSO	-.07324*	0.00832407	9.00014e-09	-0.0968707	-0.0496078
		rcd1, DMSO	-.07217*	0.00832407	1.22158e-08	-0.0957992	-0.0485362
		Col0, SHAM	-0.00744623	0.00832407	1	-0.0310777	0.0161852
4 hrs	Col-0, DMSO	rcd1, DMSO	0.000928202	0.00868983	1	-0.0237416	0.025598
		Col0, SHAM	.07278*	0.00868983	2.47886e-08	0.0481078	0.0974475
		rcd1, SHAM	.08018*	0.00868983	3.30459e-09	0.0555141	0.104854
	rcd1, DMSO	Col-0, DMSO	-0.000928202	0.00868983	1	-0.025598	0.0237416
		Col0, SHAM	.07185*	0.00868983	3.21264e-08	0.0471796	0.0965193
		rcd1, SHAM	.07926*	0.00868983	4.23168e-09	0.0545859	0.103926
	Col0, SHAM	Col-0, DMSO	-.07278*	0.00868983	2.47886e-08	-0.0974475	-0.0481078
		rcd1, DMSO	-.07185*	0.00868983	3.21264e-08	-0.0965193	-0.0471796
		rcd1, SHAM	0.0074063	0.00868983	1	-0.0172635	0.0320761
	rcd1, SHAM	Col-0, DMSO	-.08018*	0.00868983	3.30459e-09	-0.104854	-0.0555141
		rcd1, DMSO	-.07926*	0.00868983	4.23168e-09	-0.103926	-0.0545859
		Col0, SHAM	-0.0074063	0.00868983	1	-0.0320761	0.0172635
5 hrs	Col-0, DMSO	rcd1, DMSO	0.000817695	0.00877798	1	-0.0241024	0.0257378
		Col0, SHAM	.08061*	0.00877798	3.65992e-09	0.0556893	0.10553
		rcd1, SHAM	.08656*	0.00877798	7.85466e-10	0.0616416	0.111482
	rcd1, DMSO	Col-0, DMSO	-0.000817695	0.00877798	1	-0.0257378	0.0241024
		Col0, SHAM	.07979*	0.00877798	4.54287e-09	0.0548716	0.104712
		rcd1, SHAM	.08574*	0.00877798	9.66946e-10	0.0608239	0.110664
	Col0, SHAM	Col-0, DMSO	-.08061*	0.00877798	3.65992e-09	-0.10553	-0.0556893
		rcd1, DMSO	-.07979*	0.00877798	4.54287e-09	-0.104712	-0.0548716
		rcd1, SHAM	0.00595224	0.00877798	1	-0.0189679	0.0308723
	rcd1, SHAM	Col-0, DMSO	-.08656*	0.00877798	7.85466e-10	-0.111482	-0.0616416
		rcd1, DMSO	-.08574*	0.00877798	9.66946e-10	-0.110664	-0.0608239
		Col0, SHAM	-0.00595224	0.00877798	1	-0.0308723	0.0189679
6 hrs	Col-0, DMSO	rcd1, DMSO	0.000708963	0.00878319	1	-0.0242259	0.0256439
		Col0, SHAM	.08919*	0.00878319	4.11511e-10	0.0642513	0.114121
		rcd1, SHAM	.09516*	0.00878319	9.57117e-11	0.0702229	0.120093
	rcd1, DMSO	Col-0, DMSO	-0.000708963	0.00878319	1	-0.0256439	0.0242259
		Col0, SHAM	.08848*	0.00878319	4.91202e-10	0.0635423	0.113412
		rcd1, SHAM	.09445*	0.00878319	1.13465e-10	0.0695139	0.119384
	Col0, SHAM	Col-0, DMSO	-.08919*	0.00878319	4.11511e-10	-0.114121	-0.0642513
		rcd1, DMSO	-.08848*	0.00878319	4.91202e-10	-0.113412	-0.0635423
		rcd1, SHAM	0.00597162	0.00878319	1	-0.0189633	0.0309065
	rcd1, SHAM	Col-0, DMSO	-.09516*	0.00878319	9.57117e-11	-0.120093	-0.0702229
		rcd1, DMSO	-.09445*	0.00878319	1.13465e-10	-0.119384	-0.0695139
		Col0, SHAM	-0.00597162	0.00878319	1	-0.0309065	0.0189633
7 hrs	Col-0, DMSO	rcd1, DMSO	9.13741e-05	0.00877894	1	-0.0248314	0.0250142
		Col0, SHAM	.09485*	0.00877894	1.02002e-10	0.0699234	0.119769
		rcd1, SHAM	.09866*	0.00877894	4.13306e-11	0.0737356	0.123581
	rcd1, DMSO	Col-0, DMSO	-9.13741e-05	0.00877894	1	-0.0250142	0.0248314
		Col0, SHAM	.09475*	0.00877894	1.04264e-10	0.069832	0.119678
		rcd1, SHAM	.09857*	0.00877894	4.22241e-11	0.0736442	0.12349
	Col0, SHAM	Col-0, DMSO	-.09485*	0.00877894	1.02002e-10	-0.119769	-0.0699234
		rcd1, DMSO	-.09475*	0.00877894	1.04264e-10	-0.119678	-0.069832
		rcd1, SHAM	0.00381219	0.00877894	1	-0.0211106	0.028735
	rcd1, SHAM	Col-0, DMSO	-.09866*	0.00877894	4.13306e-11	-0.123581	-0.0737356
		rcd1, DMSO	-.09857*	0.00877894	4.22241e-11	-0.12349	-0.0736442
		Col0, SHAM	-0.00381219	0.00877894	1	-0.028735	0.0211106
8 hrs	Col-0, DMSO	rcd1, DMSO	-0.00157116	0.00896512	1	-0.0270225	0.0238802
		Col0, SHAM	.10105*	0.00896512	3.85707e-11	0.0756013	0.126504
		rcd1, SHAM	.10415*	0.00896512	1.91403e-11	0.0786959	0.129599
	rcd1, DMSO	Col-0, DMSO	0.00157116	0.00896512	1	-0.0238802	0.0270225
		Col0, SHAM	.10262*	0.00896512	2.69773e-11	0.0771724	0.128075
		rcd1, SHAM	.10572*	0.00896512	1.34819e-11	0.080267	0.13117
	Col0, SHAM	Col-0, DMSO	-.10105*	0.00896512	3.85707e-11	-0.126504	-0.0756013
		rcd1, DMSO	-.10262*	0.00896512	2.69773e-11	-0.128075	-0.0771724
		rcd1, SHAM	0.00309462	0.00896512	1	-0.0223568	0.028546
	rcd1, SHAM	Col-0, DMSO	-.10415*	0.00896512	1.91403e-11	-0.129599	-0.0786959
		rcd1, DMSO	-.10572*	0.00896512	1.34819e-11	-0.13117	-0.080267
		Col0, SHAM	-0.00309462	0.00896512	1	-0.028546	0.0223568
9 hrs	Col-0, DMSO	rcd1, DMSO	-0.00140614	0.00965308	1	-0.0288106	0.0259983
		Col0, SHAM	.10632*	0.00965308	6.57404e-11	0.0789109	0.13372
		rcd1, SHAM	.11118*	0.00965308	2.33639e-11	0.0837798	0.138589
	rcd1, DMSO	Col-0, DMSO	0.00140614	0.00965308	1	-0.0259983	0.0288106
		Col0, SHAM	.10772*	0.00965308	4.861e-11	0.080317	0.135126
		rcd1, SHAM	.11259*	0.00965308	1.74265e-11	0.0851859	0.139995
	Col0, SHAM	Col-0, DMSO	-.10632*	0.00965308	6.57404e-11	-0.13372	-0.0789109
		rcd1, DMSO	-.10772*	0.00965308	4.861e-11	-0.135126	-0.080317
		rcd1, SHAM	0.00486888	0.00965308	1	-0.0225356	0.0322733
	rcd1, SHAM	Col-0, DMSO	-.11118*	0.00965308	2.33639e-11	-0.138589	-0.0837798
		rcd1, DMSO	-.11259*	0.00965308	1.74265e-11	-0.139995	-0.0851859
		Col0, SHAM	-0.00486888	0.00965308	1	-0.0322733	0.0225356
*. The mean difference is significant at the 0.05 level.

## Sheet: Fig. 4 - figure supplement 3C
Source data
	hour
	0	1	2	3	4	5	6	7	8	9	10
Col-0, DMSO	0.779015	0.788486	0.784576	0.786402	0.781088	0.780198	0.779866	0.772851	0.778626	0.771348	0.768074
	0.775115	0.790016	0.785477	0.783072	0.782462	0.778857	0.778036	0.772076	0.773528	0.766996	0.767311
	0.771755	0.783145	0.781332	0.782241	0.779598	0.777363	0.774351	0.769486	0.771861	0.768091	0.765418
	0.784884	0.793722	0.790778	0.794842	0.79366	0.792475	0.788876	0.788707	0.786765	0.784253	0.782907
ptox, DMSO	0.741558	0.778392	0.775115	0.778109	0.777994	0.781085	0.783681	0.783681	0.783681	0.783681	0.783167
	0.749877	0.780071	0.77942	0.78136	0.779015	0.780071	0.780303	0.777712	0.78043	0.77724	0.775883
	0.743162	0.781449	0.778366	0.783266	0.781714	0.782336	0.781356	0.784789	0.785273	0.783678	0.78488
	0.73957	0.7706	0.771182	0.771429	0.773697	0.774815	0.775811	0.776908	0.778813	0.778269	0.776361
Col-0, SHAM	0.746969	0.748	0.738452	0.73258	0.730179	0.724003	0.722	0.714579	0.706751	0.696286	0.676669
	0.748183	0.739976	0.728856	0.722651	0.717377	0.707383	0.704997	0.700422	0.691751	0.679077	0.663102
	0.762494	0.760907	0.750598	0.745365	0.739735	0.741313	0.734653	0.73266	0.724497	0.711207	0.694362
	0.743719	0.730567	0.713748	0.70231	0.690007	0.687237	0.680897	0.671631	0.664357	0.648606	0.638821
ptox, SHAM	0.727482	0.700957	0.670716	0.661017	0.647989	0.637519	0.636012	0.6272	0.619323	0.616497	0.604167
	0.730752	0.718506	0.695493	0.686312	0.683667	0.68	0.675989	0.672293	0.668822	0.66543	0.659366
	0.703337	0.673879	0.633681	0.597712	0.572308	0.544276	0.521542	0.502387	0.47449	0.449376	0.420118
	0.726034	0.706897	0.68618	0.676074	0.674419	0.672578	0.6669	0.666425	0.66293	0.661753	0.656574
Col-0, MV	0.755569	0.742047	0.724792	0.658835	0.505338	0.361795	0.258224	0.185921	0.153398	0.1125	0.0964912
	0.770121	0.764633	0.743737	0.65371	0.485747	0.344595	0.248512	0.194079	0.156415	0.118738	0.0862745
	0.76818	0.759322	0.720056	0.580588	0.371981	0.255977	0.188563	0.138796	0.0983607	0.0588235	0.0291667
	0.766877	0.760065	0.722924	0.613539	0.460043	0.318182	0.227207	0.169304	0.132653	0.105546	0.0730337
ptox, MV	0.738432	0.72107	0.630354	0.408216	0.243759	0.150485	0.082397	0.0106157	-0.0119904	-0.0443787	-0.0896057
	0.745628	0.71721	0.611863	0.38484	0.245819	0.150476	0.0751073	0.0328638	-0.0107239	-0.0438871	-0.0716981
	0.729951	0.728268	0.65371	0.440576	0.281333	0.179604	0.100346	0.05	0	-0.0139665	-0.0493421
	0.739385	0.735741	0.694362	0.54068	0.353234	0.227397	0.141553	0.0754717	0.0291262	-0.0110865	-0.039267
Col-0, SHAM plus MV	0.746898	0.685515	0.606152	0.506184	0.39596	0.303269	0.239316	0.195122	0.152381	0.107195	0.0911901
	0.742478	0.683893	0.59919	0.483559	0.369786	0.267857	0.212291	0.156773	0.124402	0.090301	0.067474
	0.742376	0.682128	0.595376	0.477612	0.36014	0.25298	0.199708	0.153846	0.129353	0.102787	0.0716912
	0.747228	0.706579	0.631621	0.551693	0.471795	0.384793	0.314861	0.258108	0.216833	0.183036	0.152648
ptox, SHAM plus MV	0.716769	0.609375	0.476496	0.308219	0.200653	0.127341	0.0772277	0.0318471	0	-0.012285	-0.0516304
	0.705189	0.611298	0.497436	0.396135	0.291785	0.19211	0.151923	0.104034	0.043578	0.0137741	-0.0318471
	0.701673	0.571001	0.449438	0.331313	0.221198	0.149235	0.116505	0.0578231	0.0102041	-0.0114679	-0.036855
	0.70709	0.623646	0.541977	0.445274	0.356633	0.276083	0.214936	0.150515	0.112385	0.0730479	0.0141643
Oneway ANOVA
		Sum of Squares	df	Mean Square	F	Sig.
0 hrs	Between Groups	0.0138545	7	0.00197921	38.4885	1.55021e-11
	Within Groups	0.00123416	24	5.14234e-05
	Total	0.0150886	31
1 hr	Between Groups	0.0990975	7	0.0141568	81.9911	3.34659e-15
	Within Groups	0.0041439	24	0.000172663
	Total	0.103241	31
2 hrs	Between Groups	0.26936	7	0.03848	73.5422	1.15557e-14
	Within Groups	0.0125577	24	0.000523237
	Total	0.281918	31
3 hrs	Between Groups	0.686281	7	0.0980401	60.075	1.13556e-13
	Within Groups	0.0391671	24	0.00163196
	Total	0.725448	31
4 hrs	Between Groups	1.31021	7	0.187172	89.3736	1.24715e-15
	Within Groups	0.0502625	24	0.00209427
	Total	1.36047	31
5 hrs	Between Groups	1.9792	7	0.282743	143.701	5.10843e-18
	Within Groups	0.047222	24	0.00196758
	Total	2.02642	31
6 hrs	Between Groups	2.50782	7	0.35826	211.236	5.58522e-20
	Within Groups	0.0407044	24	0.00169602
	Total	2.54852	31
7 hrs	Between Groups	2.97944	7	0.425635	253.233	6.58399e-21
	Within Groups	0.0403394	24	0.00168081
	Total	3.01978	31
8 hrs	Between Groups	3.34526	7	0.477894	265.751	3.72335e-21
	Within Groups	0.0431586	24	0.00179828
	Total	3.38842	31
9 hrs	Between Groups	3.60111	7	0.514445	263.853	4.05248e-21
	Within Groups	0.0467938	24	0.00194974
	Total	3.64791	31
VAR00012	Between Groups	3.88838	7	0.555483	259.685	4.89124e-21
	Within Groups	0.0513375	24	0.00213906
	Total	3.93972	31
Post Hoc Tests
Multiple Comparisons. Bonferroni
Dependent Variable			Mean Difference (I-J)	Std. Error	Sig.	95% Confidence Interval
						Lower Bound	Upper Bound
0 hrs	Col-0, DMSO	ptox, DMSO	.03415*	0.00507067	1.6128e-05	0.0163389	0.0519616
		Col-0, SHAM	.02735*	0.00507067	0.000430605	0.00953978	0.0451625
		ptox, SHAM	.05579*	0.00507067	2.06299e-09	0.0379796	0.0736023
		Col-0, MV	0.0125054	0.00507067	0.593162	-0.00530591	0.0303168
		ptox, MV	.03934*	0.00507067	1.51223e-06	0.0215316	0.0571543
		Col-0, SHAM-MV	.03295*	0.00507067	2.84449e-05	0.0151354	0.0507581
		ptox, SHAM-MV	.07001*	0.00507067	1.82027e-11	0.0522007	0.0878234
	ptox, DMSO	Col-0, DMSO	-.03415*	0.00507067	1.6128e-05	-0.0519616	-0.0163389
		Col-0, SHAM	-0.00679915	0.00507067	1	-0.0246105	0.0110122
		ptox, SHAM	.02164*	0.00507067	0.00748417	0.0038293	0.039452
		Col-0, MV	-.02164*	0.00507067	0.00746847	-0.0394562	-0.00383349
		ptox, MV	0.0051927	0.00507067	1	-0.0126187	0.023004
		Col-0, SHAM-MV	-0.00120355	0.00507067	1	-0.0190149	0.0166078
		ptox, SHAM-MV	.03586*	0.00507067	7.28293e-06	0.0180504	0.0536732
	Col-0, SHAM	Col-0, DMSO	-.02735*	0.00507067	0.000430605	-0.0451625	-0.00953978
		ptox, DMSO	0.00679915	0.00507067	1	-0.0110122	0.0246105
		ptox, SHAM	.02844*	0.00507067	0.000251556	0.0106285	0.0462512
		Col-0, MV	-0.0148457	0.00507067	0.206164	-0.032657	0.00296566
		ptox, MV	0.0119918	0.00507067	0.740851	-0.00581951	0.0298032
		Col-0, SHAM-MV	0.0055956	0.00507067	1	-0.0122158	0.0234069
		ptox, SHAM-MV	.04266*	0.00507067	3.58202e-07	0.0248496	0.0604723
	ptox, SHAM	Col-0, DMSO	-.05579*	0.00507067	2.06299e-09	-0.0736023	-0.0379796
		ptox, DMSO	-.02164*	0.00507067	0.00748417	-0.039452	-0.0038293
		Col-0, SHAM	-.02844*	0.00507067	0.000251556	-0.0462512	-0.0106285
		Col-0, MV	-.04329*	0.00507067	2.7489e-07	-0.0610968	-0.0254741
		ptox, MV	-0.016448	0.00507067	0.0967148	-0.0342593	0.0013634
		Col-0, SHAM-MV	-.02284*	0.00507067	0.00409293	-0.0406556	-0.00503285
		ptox, SHAM-MV	0.0142211	0.00507067	0.275069	-0.0035902	0.0320325
	Col-0, MV	Col-0, DMSO	-0.0125054	0.00507067	0.593162	-0.0303168	0.00530591
		ptox, DMSO	.02164*	0.00507067	0.00746847	0.00383349	0.0394562
		Col-0, SHAM	0.0148457	0.00507067	0.206164	-0.00296566	0.032657
		ptox, SHAM	.04329*	0.00507067	2.7489e-07	0.0254741	0.0610968
		ptox, MV	.02684*	0.00507067	0.000555539	0.00902619	0.0446489
		Col-0, SHAM-MV	.02044*	0.00507067	0.0136318	0.00262994	0.0382526
		ptox, SHAM-MV	.05751*	0.00507067	1.11632e-09	0.0396953	0.075318
	ptox, MV	Col-0, DMSO	-.03934*	0.00507067	1.51223e-06	-0.0571543	-0.0215316
		ptox, DMSO	-0.0051927	0.00507067	1	-0.023004	0.0126187
		Col-0, SHAM	-0.0119918	0.00507067	0.740851	-0.0298032	0.00581951
		ptox, SHAM	0.016448	0.00507067	0.0967148	-0.0013634	0.0342593
		Col-0, MV	-.02684*	0.00507067	0.000555539	-0.0446489	-0.00902619
		Col-0, SHAM-MV	-0.00639625	0.00507067	1	-0.0242076	0.0114151
		ptox, SHAM-MV	.03067*	0.00507067	8.47241e-05	0.0128578	0.0484805
	Col-0, SHAM-MV	Col-0, DMSO	-.03295*	0.00507067	2.84449e-05	-0.0507581	-0.0151354
		ptox, DMSO	0.00120355	0.00507067	1	-0.0166078	0.0190149
		Col-0, SHAM	-0.0055956	0.00507067	1	-0.0234069	0.0122158
		ptox, SHAM	.02284*	0.00507067	0.00409293	0.00503285	0.0406556
		Col-0, MV	-.02044*	0.00507067	0.0136318	-0.0382526	-0.00262994
		ptox, MV	0.00639625	0.00507067	1	-0.0114151	0.0242076
		ptox, SHAM-MV	.03707*	0.00507067	4.20012e-06	0.019254	0.0548767
	ptox, SHAM-MV	Col-0, DMSO	-.07001*	0.00507067	1.82027e-11	-0.0878234	-0.0522007
		ptox, DMSO	-.03586*	0.00507067	7.28293e-06	-0.0536732	-0.0180504
		Col-0, SHAM	-.04266*	0.00507067	3.58202e-07	-0.0604723	-0.0248496
		ptox, SHAM	-0.0142211	0.00507067	0.275069	-0.0320325	0.0035902
		Col-0, MV	-.05751*	0.00507067	1.11632e-09	-0.075318	-0.0396953
		ptox, MV	-.03067*	0.00507067	8.47241e-05	-0.0484805	-0.0128578
		Col-0, SHAM-MV	-.03707*	0.00507067	4.20012e-06	-0.0548767	-0.019254
1 hr	Col-0, DMSO	ptox, DMSO	0.0112141	0.00929146	1	-0.0214232	0.0438515
		Col-0, SHAM	.04398*	0.00929146	0.00229055	0.0113423	0.0766171
		ptox, SHAM	.08878*	0.00929146	3.32119e-08	0.056145	0.12142
		Col-0, MV	0.0323253	0.00929146	0.0543312	-0.000312128	0.0649626
		ptox, MV	.06327*	0.00929146	1.35132e-05	0.0306323	0.0959071
		Col-0, SHAM-MV	.09931*	0.00929146	3.69021e-09	0.0666762	0.131951
		ptox, SHAM-MV	.18501*	0.00929146	5.54249e-15	0.152375	0.217649
	ptox, DMSO	Col-0, DMSO	-0.0112141	0.00929146	1	-0.0438515	0.0214232
		Col-0, SHAM	.03277*	0.00929146	0.0483204	0.0001282	0.065403
		ptox, SHAM	.07757*	0.00929146	4.12184e-07	0.0449309	0.110206
		Col-0, MV	0.0211111	0.00929146	0.905163	-0.0115263	0.0537485
		ptox, MV	.05206*	0.00929146	0.000255459	0.0194182	0.0846929
		Col-0, SHAM-MV	.08810*	0.00929146	3.85093e-08	0.0554621	0.120737
		ptox, SHAM-MV	.17380*	0.00929146	2.27758e-14	0.14116	0.206435
	Col-0, SHAM	Col-0, DMSO	-.04398*	0.00929146	0.00229055	-0.0766171	-0.0113423
		ptox, DMSO	-.03277*	0.00929146	0.0483204	-0.065403	-0.0001282
		ptox, SHAM	.04480*	0.00929146	0.00182884	0.0121653	0.0774401
		Col-0, MV	-0.0116545	0.00929146	1	-0.0442919	0.0209829
		ptox, MV	0.01929	0.00929146	1	-0.0133474	0.0519273
		Col-0, SHAM-MV	.05533*	0.00929146	0.000106488	0.0226965	0.0879712
		ptox, SHAM-MV	.14103*	0.00929146	2.34827e-12	0.108395	0.17367
	ptox, SHAM	Col-0, DMSO	-.08878*	0.00929146	3.32119e-08	-0.12142	-0.056145
		ptox, DMSO	-.07757*	0.00929146	4.12184e-07	-0.110206	-0.0449309
		Col-0, SHAM	-.04480*	0.00929146	0.00182884	-0.0774401	-0.0121653
		Col-0, MV	-.05646*	0.00929146	7.91184e-05	-0.0890946	-0.0238198
		ptox, MV	-0.0255127	0.00929146	0.31516	-0.0581501	0.00712465
		Col-0, SHAM-MV	0.0105312	0.00929146	1	-0.0221062	0.0431685
		ptox, SHAM-MV	.09623*	0.00929146	6.91027e-09	0.0635921	0.128867
	Col-0, MV	Col-0, DMSO	-0.0323253	0.00929146	0.0543312	-0.0649626	0.000312128
		ptox, DMSO	-0.0211111	0.00929146	0.905163	-0.0537485	0.0115263
		Col-0, SHAM	0.0116545	0.00929146	1	-0.0209829	0.0442919
		ptox, SHAM	.05646*	0.00929146	7.91184e-05	0.0238198	0.0890946
		ptox, MV	0.0309444	0.00929146	0.0782935	-0.00169295	0.0635818
		Col-0, SHAM-MV	.06699*	0.00929146	5.29267e-06	0.0343509	0.0996257
		ptox, SHAM-MV	.15269*	0.00929146	4.10279e-13	0.120049	0.185324
	ptox, MV	Col-0, DMSO	-.06327*	0.00929146	1.35132e-05	-0.0959071	-0.0306323
		ptox, DMSO	-.05206*	0.00929146	0.000255459	-0.0846929	-0.0194182
		Col-0, SHAM	-0.01929	0.00929146	1	-0.0519273	0.0133474
		ptox, SHAM	0.0255127	0.00929146	0.31516	-0.00712465	0.0581501
		Col-0, MV	-0.0309444	0.00929146	0.0782935	-0.0635818	0.00169295
		Col-0, SHAM-MV	.03604*	0.00929146	0.0200064	0.00340651	0.0686813
		ptox, SHAM-MV	.12174*	0.00929146	5.55408e-11	0.0891048	0.15438
	Col-0, SHAM-MV	Col-0, DMSO	-.09931*	0.00929146	3.69021e-09	-0.131951	-0.0666762
		ptox, DMSO	-.08810*	0.00929146	3.85093e-08	-0.120737	-0.0554621
		Col-0, SHAM	-.05533*	0.00929146	0.000106488	-0.0879712	-0.0226965
		ptox, SHAM	-0.0105312	0.00929146	1	-0.0431685	0.0221062
		Col-0, MV	-.06699*	0.00929146	5.29267e-06	-0.0996257	-0.0343509
		ptox, MV	-.03604*	0.00929146	0.0200064	-0.0686813	-0.00340651
		ptox, SHAM-MV	.08570*	0.00929146	6.51487e-08	0.0530609	0.118336
	ptox, SHAM-MV	Col-0, DMSO	-.18501*	0.00929146	5.54249e-15	-0.217649	-0.152375
		ptox, DMSO	-.17380*	0.00929146	2.27758e-14	-0.206435	-0.14116
		Col-0, SHAM	-.14103*	0.00929146	2.34827e-12	-0.17367	-0.108395
		ptox, SHAM	-.09623*	0.00929146	6.91027e-09	-0.128867	-0.0635921
		Col-0, MV	-.15269*	0.00929146	4.10279e-13	-0.185324	-0.120049
		ptox, MV	-.12174*	0.00929146	5.55408e-11	-0.15438	-0.0891048
		Col-0, SHAM-MV	-.08570*	0.00929146	6.51487e-08	-0.118336	-0.0530609
2 hrs	Col-0, DMSO	ptox, DMSO	0.00951998	0.0161746	1	-0.0472954	0.0663353
		Col-0, SHAM	0.0526273	0.0161746	0.0944035	-0.00418805	0.109443
		ptox, SHAM	.11402*	0.0161746	7.68273e-06	0.0572079	0.170839
		Col-0, MV	.05766*	0.0161746	0.043902	0.000848544	0.114479
		ptox, MV	.13797*	0.0161746	2.78746e-07	0.0811532	0.194784
		Col-0, SHAM-MV	.17746*	0.0161746	2.18541e-09	0.120641	0.234272
		ptox, SHAM-MV	.29420*	0.0161746	4.27066e-14	0.237389	0.351019
	ptox, DMSO	Col-0, DMSO	-0.00951998	0.0161746	1	-0.0663353	0.0472954
		Col-0, SHAM	0.0431073	0.0161746	0.37927	-0.013708	0.0999226
		ptox, SHAM	.10450*	0.0161746	3.10617e-05	0.047688	0.161319
		Col-0, MV	0.0481439	0.0161746	0.183723	-0.00867143	0.104959
		ptox, MV	.12845*	0.0161746	1.00633e-06	0.0716332	0.185264
		Col-0, SHAM-MV	.16794*	0.0161746	6.57666e-09	0.111121	0.224752
		ptox, SHAM-MV	.28468*	0.0161746	8.91966e-14	0.227869	0.341499
	Col-0, SHAM	Col-0, DMSO	-0.0526273	0.0161746	0.0944035	-0.109443	0.00418805
		ptox, DMSO	-0.0431073	0.0161746	0.37927	-0.0999226	0.013708
		ptox, SHAM	.06140*	0.0161746	0.0246747	0.00458065	0.118211
		Col-0, MV	0.00503659	0.0161746	1	-0.0517787	0.0618519
		ptox, MV	.08534*	0.0161746	0.000579051	0.0285259	0.142157
		Col-0, SHAM-MV	.12483*	0.0161746	1.6595e-06	0.0680136	0.181644
		ptox, SHAM-MV	.24158*	0.0161746	3.33861e-12	0.184761	0.298392
	ptox, SHAM	Col-0, DMSO	-.11402*	0.0161746	7.68273e-06	-0.170839	-0.0572079
		ptox, DMSO	-.10450*	0.0161746	3.10617e-05	-0.161319	-0.047688
		Col-0, SHAM	-.06140*	0.0161746	0.0246747	-0.118211	-0.00458065
		Col-0, MV	-0.0563594	0.0161746	0.0536105	-0.113175	0.000455945
		ptox, MV	0.0239453	0.0161746	1	-0.0328701	0.0807606
		Col-0, SHAM-MV	.06343*	0.0161746	0.0179747	0.00661759	0.120248
		ptox, SHAM-MV	.18018*	0.0161746	1.60618e-09	0.123366	0.236996
	Col-0, MV	Col-0, DMSO	-.05766*	0.0161746	0.043902	-0.114479	-0.000848544
		ptox, DMSO	-0.0481439	0.0161746	0.183723	-0.104959	0.00867143
		Col-0, SHAM	-0.00503659	0.0161746	1	-0.0618519	0.0517787
		ptox, SHAM	0.0563594	0.0161746	0.0536105	-0.000455945	0.113175
		ptox, MV	.08030*	0.0161746	0.00127238	0.0234893	0.13712
		Col-0, SHAM-MV	.11979*	0.0161746	3.36545e-06	0.062977	0.176608
		ptox, SHAM-MV	.23654*	0.0161746	5.27544e-12	0.179725	0.293356
	ptox, MV	Col-0, DMSO	-.13797*	0.0161746	2.78746e-07	-0.194784	-0.0811532
		ptox, DMSO	-.12845*	0.0161746	1.00633e-06	-0.185264	-0.0716332
		Col-0, SHAM	-.08534*	0.0161746	0.000579051	-0.142157	-0.0285259
		ptox, SHAM	-0.0239453	0.0161746	1	-0.0807606	0.0328701
		Col-0, MV	-.08030*	0.0161746	0.00127238	-0.13712	-0.0234893
		Col-0, SHAM-MV	0.0394877	0.0161746	0.626701	-0.0173277	0.096303
		ptox, SHAM-MV	.15624*	0.0161746	2.69675e-08	0.0994202	0.213051
	Col-0, SHAM-MV	Col-0, DMSO	-.17746*	0.0161746	2.18541e-09	-0.234272	-0.120641
		ptox, DMSO	-.16794*	0.0161746	6.57666e-09	-0.224752	-0.111121
		Col-0, SHAM	-.12483*	0.0161746	1.6595e-06	-0.181644	-0.0680136
		ptox, SHAM	-.06343*	0.0161746	0.0179747	-0.120248	-0.00661759
		Col-0, MV	-.11979*	0.0161746	3.36545e-06	-0.176608	-0.062977
		ptox, MV	-0.0394877	0.0161746	0.626701	-0.096303	0.0173277
		ptox, SHAM-MV	.11675*	0.0161746	5.19189e-06	0.0599326	0.173563
	ptox, SHAM-MV	Col-0, DMSO	-.29420*	0.0161746	4.27066e-14	-0.351019	-0.237389
		ptox, DMSO	-.28468*	0.0161746	8.91966e-14	-0.341499	-0.227869
		Col-0, SHAM	-.24158*	0.0161746	3.33861e-12	-0.298392	-0.184761
		ptox, SHAM	-.18018*	0.0161746	1.60618e-09	-0.236996	-0.123366
		Col-0, MV	-.23654*	0.0161746	5.27544e-12	-0.293356	-0.179725
		ptox, MV	-.15624*	0.0161746	2.69675e-08	-0.213051	-0.0994202
		Col-0, SHAM-MV	-.11675*	0.0161746	5.19189e-06	-0.173563	-0.0599326
3 hrs	Col-0, DMSO	ptox, DMSO	0.00809831	0.0285654	1	-0.092241	0.108438
		Col-0, SHAM	0.0609126	0.0285654	1	-0.0394267	0.161252
		ptox, SHAM	.13136*	0.0285654	0.00322703	0.031021	0.2317
		Col-0, MV	.15997*	0.0285654	0.000256952	0.0596319	0.260311
		ptox, MV	.34306*	0.0285654	3.44164e-10	0.242722	0.443401
		Col-0, SHAM-MV	.28188*	0.0285654	1.78375e-08	0.181538	0.382217
		ptox, SHAM-MV	.41640*	0.0285654	5.6559e-12	0.316065	0.516743
	ptox, DMSO	Col-0, DMSO	-0.00809831	0.0285654	1	-0.108438	0.092241
		Col-0, SHAM	0.0528143	0.0285654	1	-0.047525	0.153154
		ptox, SHAM	.12326*	0.0285654	0.00663704	0.0229227	0.223601
		Col-0, MV	.15187*	0.0285654	0.000522989	0.0515336	0.252212
		ptox, MV	.33496*	0.0285654	5.63486e-10	0.234624	0.435302
		Col-0, SHAM-MV	.27378*	0.0285654	3.13326e-08	0.17344	0.374118
		ptox, SHAM-MV	.40831*	0.0285654	8.64711e-12	0.307966	0.508645
	Col-0, SHAM	Col-0, DMSO	-0.0609126	0.0285654	1	-0.161252	0.0394267
		ptox, DMSO	-0.0528143	0.0285654	1	-0.153154	0.047525
		ptox, SHAM	0.0704477	0.0285654	0.593209	-0.0298916	0.170787
		Col-0, MV	0.0990587	0.0285654	0.0558606	-0.00128071	0.199398
		ptox, MV	.28215*	0.0285654	1.75069e-08	0.181809	0.382488
		Col-0, SHAM-MV	.22096*	0.0285654	1.59429e-06	0.120625	0.321304
		ptox, SHAM-MV	.35549*	0.0285654	1.64126e-10	0.255152	0.455831
	ptox, SHAM	Col-0, DMSO	-.13136*	0.0285654	0.00322703	-0.2317	-0.031021
		ptox, DMSO	-.12326*	0.0285654	0.00663704	-0.223601	-0.0229227
		Col-0, SHAM	-0.0704477	0.0285654	0.593209	-0.170787	0.0298916
		Col-0, MV	0.0286109	0.0285654	1	-0.0717284	0.12895
		ptox, MV	.21170*	0.0285654	3.32776e-06	0.111362	0.31204
		Col-0, SHAM-MV	.15052*	0.0285654	0.000589403	0.0501776	0.250856
		ptox, SHAM-MV	.28504*	0.0285654	1.43503e-08	0.184704	0.385383
	Col-0, MV	Col-0, DMSO	-.15997*	0.0285654	0.000256952	-0.260311	-0.0596319
		ptox, DMSO	-.15187*	0.0285654	0.000522989	-0.252212	-0.0515336
		Col-0, SHAM	-0.0990587	0.0285654	0.0558606	-0.199398	0.00128071
		ptox, SHAM	-0.0286109	0.0285654	1	-0.12895	0.0717284
		ptox, MV	.18309*	0.0285654	3.51638e-05	0.0827507	0.283429
		Col-0, SHAM-MV	.12191*	0.0285654	0.00748781	0.0215667	0.222245
		ptox, SHAM-MV	.25643*	0.0285654	1.08397e-07	0.156093	0.356772
	ptox, MV	Col-0, DMSO	-.34306*	0.0285654	3.44164e-10	-0.443401	-0.242722
		ptox, DMSO	-.33496*	0.0285654	5.63486e-10	-0.435302	-0.234624
		Col-0, SHAM	-.28215*	0.0285654	1.75069e-08	-0.382488	-0.181809
		ptox, SHAM	-.21170*	0.0285654	3.32776e-06	-0.31204	-0.111362
		Col-0, MV	-.18309*	0.0285654	3.51638e-05	-0.283429	-0.0827507
		Col-0, SHAM-MV	-0.061184	0.0285654	1	-0.161523	0.0391554
		ptox, SHAM-MV	0.0733425	0.0285654	0.473128	-0.0269968	0.173682
	Col-0, SHAM-MV	Col-0, DMSO	-.28188*	0.0285654	1.78375e-08	-0.382217	-0.181538
		ptox, DMSO	-.27378*	0.0285654	3.13326e-08	-0.374118	-0.17344
		Col-0, SHAM	-.22096*	0.0285654	1.59429e-06	-0.321304	-0.120625
		ptox, SHAM	-.15052*	0.0285654	0.000589403	-0.250856	-0.0501776
		Col-0, MV	-.12191*	0.0285654	0.00748781	-0.222245	-0.0215667
		ptox, MV	0.061184	0.0285654	1	-0.0391554	0.161523
		ptox, SHAM-MV	.13453*	0.0285654	0.00243421	0.0341872	0.234866
	ptox, SHAM-MV	Col-0, DMSO	-.41640*	0.0285654	5.6559e-12	-0.516743	-0.316065
		ptox, DMSO	-.40831*	0.0285654	8.64711e-12	-0.508645	-0.307966
		Col-0, SHAM	-.35549*	0.0285654	1.64126e-10	-0.455831	-0.255152
		ptox, SHAM	-.28504*	0.0285654	1.43503e-08	-0.385383	-0.184704
		Col-0, MV	-.25643*	0.0285654	1.08397e-07	-0.356772	-0.156093
		ptox, MV	-0.0733425	0.0285654	0.473128	-0.173682	0.0269968
		Col-0, SHAM-MV	-.13453*	0.0285654	0.00243421	-0.234866	-0.0341872
4 hrs	Col-0, DMSO	ptox, DMSO	0.00609686	0.0323595	1	-0.10757	0.119763
		Col-0, SHAM	0.0648777	0.0323595	1	-0.0487888	0.178544
		ptox, SHAM	.13961*	0.0323595	0.00665121	0.0259402	0.253273
		Col-0, MV	.32842*	0.0323595	1.0297e-08	0.214758	0.442091
		ptox, MV	.50317*	0.0323595	1.38565e-12	0.389499	0.616832
		Col-0, SHAM-MV	.38478*	0.0323595	4.22725e-10	0.271116	0.498449
		ptox, SHAM-MV	.51663*	0.0323595	7.75632e-13	0.402968	0.630301
	ptox, DMSO	Col-0, DMSO	-0.00609686	0.0323595	1	-0.119763	0.10757
		Col-0, SHAM	0.0587808	0.0323595	1	-0.0548857	0.172447
		ptox, SHAM	.13351*	0.0323595	0.0107298	0.0198433	0.247176
		Col-0, MV	.32233*	0.0323595	1.48583e-08	0.208662	0.435995
		ptox, MV	.49707*	0.0323595	1.80952e-12	0.383402	0.610735
		Col-0, SHAM-MV	.37869*	0.0323595	5.87456e-10	0.265019	0.492352
		ptox, SHAM-MV	.51054*	0.0323595	1.00702e-12	0.396872	0.624205
	Col-0, SHAM	Col-0, DMSO	-0.0648777	0.0323595	1	-0.178544	0.0487888
		ptox, DMSO	-0.0587808	0.0323595	1	-0.172447	0.0548857
		ptox, SHAM	0.074729	0.0323595	0.835623	-0.0389375	0.188395
		Col-0, MV	.26355*	0.0323595	6.42957e-07	0.149881	0.377214
		ptox, MV	.43829*	0.0323595	2.74532e-11	0.324621	0.551954
		Col-0, SHAM-MV	.31990*	0.0323595	1.7211e-08	0.206238	0.433571
		ptox, SHAM-MV	.45176*	0.0323595	1.43642e-11	0.338091	0.565424
	ptox, SHAM	Col-0, DMSO	-.13961*	0.0323595	0.00665121	-0.253273	-0.0259402
		ptox, DMSO	-.13351*	0.0323595	0.0107298	-0.247176	-0.0198433
		Col-0, SHAM	-0.074729	0.0323595	0.835623	-0.188395	0.0389375
		Col-0, MV	.18882*	0.0323595	0.000143329	0.0751517	0.302485
		ptox, MV	.36356*	0.0323595	1.3513e-09	0.249892	0.477226
		Col-0, SHAM-MV	.24518*	0.0323595	2.28185e-06	0.131509	0.358842
		ptox, SHAM-MV	.37703*	0.0323595	6.42837e-10	0.263362	0.490695
	Col-0, MV	Col-0, DMSO	-.32842*	0.0323595	1.0297e-08	-0.442091	-0.214758
		ptox, DMSO	-.32233*	0.0323595	1.48583e-08	-0.435995	-0.208662
		Col-0, SHAM	-.26355*	0.0323595	6.42957e-07	-0.377214	-0.149881
		ptox, SHAM	-.18882*	0.0323595	0.000143329	-0.302485	-0.0751517
		ptox, MV	.17474*	0.0323595	0.000424159	0.0610743	0.288407
		Col-0, SHAM-MV	0.0563572	0.0323595	1	-0.0573093	0.170024
		ptox, SHAM-MV	.18821*	0.0323595	0.000150157	0.0745435	0.301877
	ptox, MV	Col-0, DMSO	-.50317*	0.0323595	1.38565e-12	-0.616832	-0.389499
		ptox, DMSO	-.49707*	0.0323595	1.80952e-12	-0.610735	-0.383402
		Col-0, SHAM	-.43829*	0.0323595	2.74532e-11	-0.551954	-0.324621
		ptox, SHAM	-.36356*	0.0323595	1.3513e-09	-0.477226	-0.249892
		Col-0, MV	-.17474*	0.0323595	0.000424159	-0.288407	-0.0610743
		Col-0, SHAM-MV	-.11838*	0.0323595	0.0348033	-0.23205	-0.00471708
		ptox, SHAM-MV	0.0134692	0.0323595	1	-0.100197	0.127136
	Col-0, SHAM-MV	Col-0, DMSO	-.38478*	0.0323595	4.22725e-10	-0.498449	-0.271116
		ptox, DMSO	-.37869*	0.0323595	5.87456e-10	-0.492352	-0.265019
		Col-0, SHAM	-.31990*	0.0323595	1.7211e-08	-0.433571	-0.206238
		ptox, SHAM	-.24518*	0.0323595	2.28185e-06	-0.358842	-0.131509
		Col-0, MV	-0.0563572	0.0323595	1	-0.170024	0.0573093
		ptox, MV	.11838*	0.0323595	0.0348033	0.00471708	0.23205
		ptox, SHAM-MV	.13185*	0.0323595	0.0122157	0.0181863	0.245519
	ptox, SHAM-MV	Col-0, DMSO	-.51663*	0.0323595	7.75632e-13	-0.630301	-0.402968
		ptox, DMSO	-.51054*	0.0323595	1.00702e-12	-0.624205	-0.396872
		Col-0, SHAM	-.45176*	0.0323595	1.43642e-11	-0.565424	-0.338091
		ptox, SHAM	-.37703*	0.0323595	6.42837e-10	-0.490695	-0.263362
		Col-0, MV	-.18821*	0.0323595	0.000150157	-0.301877	-0.0745435
		ptox, MV	-0.0134692	0.0323595	1	-0.127136	0.100197
		Col-0, SHAM-MV	-.13185*	0.0323595	0.0122157	-0.245519	-0.0181863
5 hrs	Col-0, DMSO	ptox, DMSO	0.00264649	0.0313655	1	-0.107528	0.112821
		Col-0, SHAM	0.0672394	0.0313655	1	-0.0429355	0.177414
		ptox, SHAM	.14863*	0.0313655	0.00225991	0.0384548	0.258805
		Col-0, MV	.46209*	0.0313655	4.49625e-12	0.351911	0.572261
		ptox, MV	.60523*	0.0313655	1.12893e-14	0.495057	0.715407
		Col-0, SHAM-MV	.48000*	0.0313655	1.96397e-12	0.369823	0.590173
		ptox, SHAM-MV	.59603*	0.0313655	1.59556e-14	0.485856	0.706206
	ptox, DMSO	Col-0, DMSO	-0.00264649	0.0313655	1	-0.112821	0.107528
		Col-0, SHAM	0.0645929	0.0313655	1	-0.045582	0.174768
		ptox, SHAM	.14598*	0.0313655	0.0028008	0.0358083	0.256158
		Col-0, MV	.45944*	0.0313655	5.09278e-12	0.349265	0.569615
		ptox, MV	.60259*	0.0313655	1.24645e-14	0.492411	0.712761
		Col-0, SHAM-MV	.47735*	0.0313655	2.21607e-12	0.367177	0.587527
		ptox, SHAM-MV	.59338*	0.0313655	1.76403e-14	0.48321	0.703559
	Col-0, SHAM	Col-0, DMSO	-0.0672394	0.0313655	1	-0.177414	0.0429355
		ptox, DMSO	-0.0645929	0.0313655	1	-0.174768	0.045582
		ptox, SHAM	0.0813903	0.0313655	0.444817	-0.0287846	0.191565
		Col-0, MV	.39485*	0.0313655	1.29052e-10	0.284672	0.505022
		ptox, MV	.53799*	0.0313655	1.58561e-13	0.427818	0.648168
		Col-0, SHAM-MV	.41276*	0.0313655	5.0656e-11	0.302584	0.522934
		ptox, SHAM-MV	.52879*	0.0313655	2.32677e-13	0.418617	0.638967
	ptox, SHAM	Col-0, DMSO	-.14863*	0.0313655	0.00225991	-0.258805	-0.0384548
		ptox, DMSO	-.14598*	0.0313655	0.0028008	-0.256158	-0.0358083
		Col-0, SHAM	-0.0813903	0.0313655	0.444817	-0.191565	0.0287846
		Col-0, MV	.31346*	0.0313655	1.39345e-08	0.203281	0.423631
		ptox, MV	.45660*	0.0313655	5.82416e-12	0.346428	0.566778
		Col-0, SHAM-MV	.33137*	0.0313655	4.65704e-09	0.221194	0.441544
		ptox, SHAM-MV	.44740*	0.0313655	9.04226e-12	0.337226	0.557576
	Col-0, MV	Col-0, DMSO	-.46209*	0.0313655	4.49625e-12	-0.572261	-0.351911
		ptox, DMSO	-.45944*	0.0313655	5.09278e-12	-0.569615	-0.349265
		Col-0, SHAM	-.39485*	0.0313655	1.29052e-10	-0.505022	-0.284672
		ptox, SHAM	-.31346*	0.0313655	1.39345e-08	-0.423631	-0.203281
		ptox, MV	.14315*	0.0313655	0.00352547	0.0329714	0.253321
		Col-0, SHAM-MV	0.0179123	0.0313655	1	-0.0922627	0.128087
		ptox, SHAM-MV	.13394*	0.0313655	0.00743391	0.02377	0.24412
	ptox, MV	Col-0, DMSO	-.60523*	0.0313655	1.12893e-14	-0.715407	-0.495057
		ptox, DMSO	-.60259*	0.0313655	1.24645e-14	-0.712761	-0.492411
		Col-0, SHAM	-.53799*	0.0313655	1.58561e-13	-0.648168	-0.427818
		ptox, SHAM	-.45660*	0.0313655	5.82416e-12	-0.566778	-0.346428
		Col-0, MV	-.14315*	0.0313655	0.00352547	-0.253321	-0.0329714
		Col-0, SHAM-MV	-.12523*	0.0313655	0.0150266	-0.235409	-0.0150591
		ptox, SHAM-MV	-0.0092014	0.0313655	1	-0.119376	0.100974
	Col-0, SHAM-MV	Col-0, DMSO	-.48000*	0.0313655	1.96397e-12	-0.590173	-0.369823
		ptox, DMSO	-.47735*	0.0313655	2.21607e-12	-0.587527	-0.367177
		Col-0, SHAM	-.41276*	0.0313655	5.0656e-11	-0.522934	-0.302584
		ptox, SHAM	-.33137*	0.0313655	4.65704e-09	-0.441544	-0.221194
		Col-0, MV	-0.0179123	0.0313655	1	-0.128087	0.0922627
		ptox, MV	.12523*	0.0313655	0.0150266	0.0150591	0.235409
		ptox, SHAM-MV	.11603*	0.0313655	0.0314174	0.00585769	0.226208
	ptox, SHAM-MV	Col-0, DMSO	-.59603*	0.0313655	1.59556e-14	-0.706206	-0.485856
		ptox, DMSO	-.59338*	0.0313655	1.76403e-14	-0.703559	-0.48321
		Col-0, SHAM	-.52879*	0.0313655	2.32677e-13	-0.638967	-0.418617
		ptox, SHAM	-.44740*	0.0313655	9.04226e-12	-0.557576	-0.337226
		Col-0, MV	-.13394*	0.0313655	0.00743391	-0.24412	-0.02377
		ptox, MV	0.0092014	0.0313655	1	-0.100974	0.119376
		Col-0, SHAM-MV	-.11603*	0.0313655	0.0314174	-0.226208	-0.00585769
6 hrs	Col-0, DMSO	ptox, DMSO	-5.835e-06	0.0291206	1	-0.102295	0.102284
		Col-0, SHAM	0.0696452	0.0291206	0.698986	-0.0326444	0.171935
		ptox, SHAM	.15517*	0.0291206	0.000507576	0.0528814	0.257461
		Col-0, MV	.54966*	0.0291206	1.85746e-14	0.447366	0.651945
		ptox, MV	.68043*	0.0291206	1.43021e-16	0.578142	0.782721
		Col-0, SHAM-MV	.53874*	0.0291206	2.91812e-14	0.436448	0.641027
		ptox, SHAM-MV	.64013*	0.0291206	5.81286e-16	0.537844	0.742424
	ptox, DMSO	Col-0, DMSO	5.835e-06	0.0291206	1	-0.102284	0.102295
		Col-0, SHAM	0.069651	0.0291206	0.69868	-0.0326386	0.171941
		ptox, SHAM	.15518*	0.0291206	0.00050732	0.0528873	0.257467
		Col-0, MV	.54966*	0.0291206	1.85701e-14	0.447372	0.651951
		ptox, MV	.68044*	0.0291206	1.42993e-16	0.578148	0.782727
		Col-0, SHAM-MV	.53874*	0.0291206	2.91741e-14	0.436454	0.641033
		ptox, SHAM-MV	.64014*	0.0291206	5.81164e-16	0.53785	0.742429
	Col-0, SHAM	Col-0, DMSO	-0.0696452	0.0291206	0.698986	-0.171935	0.0326444
		ptox, DMSO	-0.069651	0.0291206	0.69868	-0.171941	0.0326386
		ptox, SHAM	0.0855259	0.0291206	0.201739	-0.0167638	0.187815
		Col-0, MV	.48001*	0.0291206	3.83336e-13	0.377721	0.5823
		ptox, MV	.61079*	0.0291206	1.6993e-15	0.508496	0.713076
		Col-0, SHAM-MV	.46909*	0.0291206	6.37193e-13	0.366803	0.571382
		ptox, SHAM-MV	.57049*	0.0291206	8.01489e-15	0.468199	0.672778
	ptox, SHAM	Col-0, DMSO	-.15517*	0.0291206	0.000507576	-0.257461	-0.0528814
		ptox, DMSO	-.15518*	0.0291206	0.00050732	-0.257467	-0.0528873
		Col-0, SHAM	-0.0855259	0.0291206	0.201739	-0.187815	0.0167638
		Col-0, MV	.39448*	0.0291206	2.73569e-11	0.292195	0.496774
		ptox, MV	.52526*	0.0291206	5.15386e-14	0.422971	0.62755
		Col-0, SHAM-MV	.38357*	0.0291206	4.96869e-11	0.281277	0.485856
		ptox, SHAM-MV	.48496*	0.0291206	3.05398e-13	0.382673	0.587253
	Col-0, MV	Col-0, DMSO	-.54966*	0.0291206	1.85746e-14	-0.651945	-0.447366
		ptox, DMSO	-.54966*	0.0291206	1.85701e-14	-0.651951	-0.447372
		Col-0, SHAM	-.48001*	0.0291206	3.83336e-13	-0.5823	-0.377721
		ptox, SHAM	-.39448*	0.0291206	2.73569e-11	-0.496774	-0.292195
		ptox, MV	.13078*	0.0291206	0.00424497	0.028486	0.233065
		Col-0, SHAM-MV	-0.0109179	0.0291206	1	-0.113208	0.0913717
		ptox, SHAM-MV	0.0904783	0.0291206	0.134564	-0.0118113	0.192768
	ptox, MV	Col-0, DMSO	-.68043*	0.0291206	1.43021e-16	-0.782721	-0.578142
		ptox, DMSO	-.68044*	0.0291206	1.42993e-16	-0.782727	-0.578148
		Col-0, SHAM	-.61079*	0.0291206	1.6993e-15	-0.713076	-0.508496
		ptox, SHAM	-.52526*	0.0291206	5.15386e-14	-0.62755	-0.422971
		Col-0, MV	-.13078*	0.0291206	0.00424497	-0.233065	-0.028486
		Col-0, SHAM-MV	-.14169*	0.0291206	0.00163619	-0.243983	-0.0394038
		ptox, SHAM-MV	-0.0402973	0.0291206	1	-0.142587	0.0619924
	Col-0, SHAM-MV	Col-0, DMSO	-.53874*	0.0291206	2.91812e-14	-0.641027	-0.436448
		ptox, DMSO	-.53874*	0.0291206	2.91741e-14	-0.641033	-0.436454
		Col-0, SHAM	-.46909*	0.0291206	6.37193e-13	-0.571382	-0.366803
		ptox, SHAM	-.38357*	0.0291206	4.96869e-11	-0.485856	-0.281277
		Col-0, MV	0.0109179	0.0291206	1	-0.0913717	0.113208
		ptox, MV	.14169*	0.0291206	0.00163619	0.0394038	0.243983
		ptox, SHAM-MV	0.101396	0.0291206	0.0539416	-0.000893434	0.203686
	ptox, SHAM-MV	Col-0, DMSO	-.64013*	0.0291206	5.81286e-16	-0.742424	-0.537844
		ptox, DMSO	-.64014*	0.0291206	5.81164e-16	-0.742429	-0.53785
		Col-0, SHAM	-.57049*	0.0291206	8.01489e-15	-0.672778	-0.468199
		ptox, SHAM	-.48496*	0.0291206	3.05398e-13	-0.587253	-0.382673
		Col-0, MV	-0.0904783	0.0291206	0.134564	-0.192768	0.0118113
		ptox, MV	0.0402973	0.0291206	1	-0.0619924	0.142587
		Col-0, SHAM-MV	-0.101396	0.0291206	0.0539416	-0.203686	0.000893434
7 hrs	Col-0, DMSO	ptox, DMSO	-0.00499248	0.0289897	1	-0.106822	0.0968374
		Col-0, SHAM	0.0709572	0.0289897	0.618005	-0.0308727	0.172787
		ptox, SHAM	.15870*	0.0289897	0.000351855	0.0568741	0.260534
		Col-0, MV	.60376*	0.0289897	1.99664e-15	0.501925	0.705585
		ptox, MV	.73354*	0.0289897	2.27113e-17	0.631712	0.835372
		Col-0, SHAM-MV	.58482*	0.0289897	4.12293e-15	0.482988	0.686648
		ptox, SHAM-MV	.68973*	0.0289897	9.43061e-17	0.587895	0.791555
	ptox, DMSO	Col-0, DMSO	0.00499248	0.0289897	1	-0.0968374	0.106822
		Col-0, SHAM	0.0759497	0.0289897	0.42037	-0.0258802	0.17778
		ptox, SHAM	.16370*	0.0289897	0.000228802	0.0618665	0.265526
		Col-0, MV	.60875*	0.0289897	1.65486e-15	0.506918	0.710578
		ptox, MV	.73853*	0.0289897	1.94081e-17	0.636705	0.840365
		Col-0, SHAM-MV	.58981*	0.0289897	3.39868e-15	0.48798	0.69164
		ptox, SHAM-MV	.69472*	0.0289897	7.98519e-17	0.592888	0.796547
	Col-0, SHAM	Col-0, DMSO	-0.0709572	0.0289897	0.618005	-0.172787	0.0308727
		ptox, DMSO	-0.0759497	0.0289897	0.42037	-0.17778	0.0258802
		ptox, SHAM	0.0877467	0.0289897	0.163018	-0.0140831	0.189577
		Col-0, MV	.53280*	0.0289897	3.38341e-14	0.430968	0.634628
		ptox, MV	.66259*	0.0289897	2.37658e-16	0.560755	0.764415
		Col-0, SHAM-MV	.51386*	0.0289897	7.61509e-14	0.412031	0.61569
		ptox, SHAM-MV	.61877*	0.0289897	1.14e-15	0.516938	0.720598
	ptox, SHAM	Col-0, DMSO	-.15870*	0.0289897	0.000351855	-0.260534	-0.0568741
		ptox, DMSO	-.16370*	0.0289897	0.000228802	-0.265526	-0.0618665
		Col-0, SHAM	-0.0877467	0.0289897	0.163018	-0.189577	0.0140831
		Col-0, MV	.44505*	0.0289897	1.83235e-12	0.343221	0.546881
		ptox, MV	.57484*	0.0289897	6.09306e-15	0.473008	0.676668
		Col-0, SHAM-MV	.42611*	0.0289897	4.72411e-12	0.324284	0.527944
		ptox, SHAM-MV	.53102*	0.0289897	3.64708e-14	0.429191	0.632851
	Col-0, MV	Col-0, DMSO	-.60376*	0.0289897	1.99664e-15	-0.705585	-0.501925
		ptox, DMSO	-.60875*	0.0289897	1.65486e-15	-0.710578	-0.506918
		Col-0, SHAM	-.53280*	0.0289897	3.38341e-14	-0.634628	-0.430968
		ptox, SHAM	-.44505*	0.0289897	1.83235e-12	-0.546881	-0.343221
		ptox, MV	.12979*	0.0289897	0.00439692	0.0279572	0.231617
		Col-0, SHAM-MV	-0.0189375	0.0289897	1	-0.120767	0.0828923
		ptox, SHAM-MV	0.0859699	0.0289897	0.188562	-0.01586	0.1878
	ptox, MV	Col-0, DMSO	-.73354*	0.0289897	2.27113e-17	-0.835372	-0.631712
		ptox, DMSO	-.73853*	0.0289897	1.94081e-17	-0.840365	-0.636705
		Col-0, SHAM	-.66259*	0.0289897	2.37658e-16	-0.764415	-0.560755
		ptox, SHAM	-.57484*	0.0289897	6.09306e-15	-0.676668	-0.473008
		Col-0, MV	-.12979*	0.0289897	0.00439692	-0.231617	-0.0279572
		Col-0, SHAM-MV	-.14872*	0.0289897	0.000837023	-0.250554	-0.0468947
		ptox, SHAM-MV	-0.0438171	0.0289897	1	-0.145647	0.0580128
	Col-0, SHAM-MV	Col-0, DMSO	-.58482*	0.0289897	4.12293e-15	-0.686648	-0.482988
		ptox, DMSO	-.58981*	0.0289897	3.39868e-15	-0.69164	-0.48798
		Col-0, SHAM	-.51386*	0.0289897	7.61509e-14	-0.61569	-0.412031
		ptox, SHAM	-.42611*	0.0289897	4.72411e-12	-0.527944	-0.324284
		Col-0, MV	0.0189375	0.0289897	1	-0.0828923	0.120767
		ptox, MV	.14872*	0.0289897	0.000837023	0.0468947	0.250554
		ptox, SHAM-MV	.10491*	0.0289897	0.0384147	0.00307757	0.206737
	ptox, SHAM-MV	Col-0, DMSO	-.68973*	0.0289897	9.43061e-17	-0.791555	-0.587895
		ptox, DMSO	-.69472*	0.0289897	7.98519e-17	-0.796547	-0.592888
		Col-0, SHAM	-.61877*	0.0289897	1.14e-15	-0.720598	-0.516938
		ptox, SHAM	-.53102*	0.0289897	3.64708e-14	-0.632851	-0.429191
		Col-0, MV	-0.0859699	0.0289897	0.188562	-0.1878	0.01586
		ptox, MV	0.0438171	0.0289897	1	-0.0580128	0.145647
		Col-0, SHAM-MV	-.10491*	0.0289897	0.0384147	-0.206737	-0.00307757
8 hrs	Col-0, DMSO	ptox, DMSO	-0.00435433	0.0299856	1	-0.109682	0.100974
		Col-0, SHAM	0.0808558	0.0299856	0.353021	-0.0244724	0.186184
		ptox, SHAM	.17130*	0.0299856	0.000194065	0.0659756	0.276632
		Col-0, MV	.64249*	0.0299856	1.04423e-15	0.53716	0.747816
		ptox, MV	.77609*	0.0299856	1.34465e-17	0.670764	0.88142
		Col-0, SHAM-MV	.62195*	0.0299856	2.19129e-15	0.516624	0.727281
		ptox, SHAM-MV	.73615*	0.0299856	4.57096e-17	0.630825	0.841481
	ptox, DMSO	Col-0, DMSO	0.00435433	0.0299856	1	-0.100974	0.109682
		Col-0, SHAM	0.0852101	0.0299856	0.252292	-0.0201181	0.190538
		ptox, SHAM	.17566*	0.0299856	0.000135384	0.0703299	0.280986
		Col-0, MV	.64684*	0.0299856	8.94821e-16	0.541514	0.752171
		ptox, MV	.78045*	0.0299856	1.18092e-17	0.675118	0.885774
		Col-0, SHAM-MV	.62631*	0.0299856	1.86919e-15	0.520979	0.731635
		ptox, SHAM-MV	.74051*	0.0299856	3.9883e-17	0.635179	0.845835
	Col-0, SHAM	Col-0, DMSO	-0.0808558	0.0299856	0.353021	-0.186184	0.0244724
		ptox, DMSO	-0.0852101	0.0299856	0.252292	-0.190538	0.0201181
		ptox, SHAM	0.090448	0.0299856	0.167124	-0.0148802	0.195776
		Col-0, MV	.56163*	0.0299856	2.21023e-14	0.456304	0.666961
		ptox, MV	.69524*	0.0299856	1.70948e-16	0.589908	0.800564
		Col-0, SHAM-MV	.54110*	0.0299856	5.10424e-14	0.435769	0.646425
		ptox, SHAM-MV	.65530*	0.0299856	6.64795e-16	0.549969	0.760625
	ptox, SHAM	Col-0, DMSO	-.17130*	0.0299856	0.000194065	-0.276632	-0.0659756
		ptox, DMSO	-.17566*	0.0299856	0.000135384	-0.280986	-0.0703299
		Col-0, SHAM	-0.090448	0.0299856	0.167124	-0.195776	0.0148802
		Col-0, MV	.47118*	0.0299856	1.10016e-12	0.365856	0.576513
		ptox, MV	.60479*	0.0299856	4.14166e-15	0.49946	0.710116
		Col-0, SHAM-MV	.45065*	0.0299856	2.91541e-12	0.345321	0.555977
		ptox, SHAM-MV	.56485*	0.0299856	1.94337e-14	0.459521	0.670177
	Col-0, MV	Col-0, DMSO	-.64249*	0.0299856	1.04423e-15	-0.747816	-0.53716
		ptox, DMSO	-.64684*	0.0299856	8.94821e-16	-0.752171	-0.541514
		Col-0, SHAM	-.56163*	0.0299856	2.21023e-14	-0.666961	-0.456304
		ptox, SHAM	-.47118*	0.0299856	1.10016e-12	-0.576513	-0.365856
		ptox, MV	.13360*	0.0299856	0.00464311	0.0282755	0.238932
		Col-0, SHAM-MV	-0.0205357	0.0299856	1	-0.125864	0.0847925
		ptox, SHAM-MV	0.0936648	0.0299856	0.129291	-0.0116634	0.198993
	ptox, MV	Col-0, DMSO	-.77609*	0.0299856	1.34465e-17	-0.88142	-0.670764
		ptox, DMSO	-.78045*	0.0299856	1.18092e-17	-0.885774	-0.675118
		Col-0, SHAM	-.69524*	0.0299856	1.70948e-16	-0.800564	-0.589908
		ptox, SHAM	-.60479*	0.0299856	4.14166e-15	-0.710116	-0.49946
		Col-0, MV	-.13360*	0.0299856	0.00464311	-0.238932	-0.0282755
		Col-0, SHAM-MV	-.15414*	0.0299856	0.000815748	-0.259467	-0.0488111
		ptox, SHAM-MV	-0.0399389	0.0299856	1	-0.145267	0.0653893
	Col-0, SHAM-MV	Col-0, DMSO	-.62195*	0.0299856	2.19129e-15	-0.727281	-0.516624
		ptox, DMSO	-.62631*	0.0299856	1.86919e-15	-0.731635	-0.520979
		Col-0, SHAM	-.54110*	0.0299856	5.10424e-14	-0.646425	-0.435769
		ptox, SHAM	-.45065*	0.0299856	2.91541e-12	-0.555977	-0.345321
		Col-0, MV	0.0205357	0.0299856	1	-0.0847925	0.125864
		ptox, MV	.15414*	0.0299856	0.000815748	0.0488111	0.259467
		ptox, SHAM-MV	.11420*	0.0299856	0.0239013	0.00887228	0.219529
	ptox, SHAM-MV	Col-0, DMSO	-.73615*	0.0299856	4.57096e-17	-0.841481	-0.630825
		ptox, DMSO	-.74051*	0.0299856	3.9883e-17	-0.845835	-0.635179
		Col-0, SHAM	-.65530*	0.0299856	6.64795e-16	-0.760625	-0.549969
		ptox, SHAM	-.56485*	0.0299856	1.94337e-14	-0.670177	-0.459521
		Col-0, MV	-0.0936648	0.0299856	0.129291	-0.198993	0.0116634
		ptox, MV	0.0399389	0.0299856	1	-0.0653893	0.145267
		Col-0, SHAM-MV	-.11420*	0.0299856	0.0239013	-0.219529	-0.00887228
9 hrs	Col-0, DMSO	ptox, DMSO	-0.00804501	0.0312229	1	-0.117719	0.101629
		Col-0, SHAM	0.0888784	0.0312229	0.249434	-0.0207958	0.198553
		ptox, SHAM	.17441*	0.0312229	0.000266277	0.0647338	0.284082
		Col-0, MV	.67377*	0.0312229	8.87636e-16	0.564096	0.783444
		ptox, MV	.80100*	0.0312229	1.65071e-17	0.691328	0.910676
		Col-0, SHAM-MV	.65184*	0.0312229	1.88939e-15	0.542168	0.761516
		ptox, SHAM-MV	.75690*	0.0312229	6.12047e-17	0.647231	0.866579
	ptox, DMSO	Col-0, DMSO	0.00804501	0.0312229	1	-0.101629	0.117719
		Col-0, SHAM	0.0969234	0.0312229	0.135465	-0.0127508	0.206598
		ptox, SHAM	.18245*	0.0312229	0.000140332	0.0727788	0.292127
		Col-0, MV	.68182*	0.0312229	6.76525e-16	0.572141	0.791489
		ptox, MV	.80905*	0.0312229	1.30917e-17	0.699373	0.918721
		Col-0, SHAM-MV	.65989*	0.0312229	1.42827e-15	0.550213	0.769561
		ptox, SHAM-MV	.76495*	0.0312229	4.79403e-17	0.655276	0.874624
	Col-0, SHAM	Col-0, DMSO	-0.0888784	0.0312229	0.249434	-0.198553	0.0207958
		ptox, DMSO	-0.0969234	0.0312229	0.135465	-0.206598	0.0127508
		ptox, SHAM	0.0855297	0.0312229	0.31992	-0.0241446	0.195204
		Col-0, MV	.58489*	0.0312229	2.203e-14	0.475218	0.694566
		ptox, MV	.71212*	0.0312229	2.49463e-16	0.602449	0.821798
		Col-0, SHAM-MV	.56296*	0.0312229	5.19851e-14	0.45329	0.672638
		ptox, SHAM-MV	.66803*	0.0312229	1.07952e-15	0.558352	0.777701
	ptox, SHAM	Col-0, DMSO	-.17441*	0.0312229	0.000266277	-0.284082	-0.0647338
		ptox, DMSO	-.18245*	0.0312229	0.000140332	-0.292127	-0.0727788
		Col-0, SHAM	-0.0855297	0.0312229	0.31992	-0.195204	0.0241446
		Col-0, MV	.49936*	0.0312229	7.46327e-13	0.389688	0.609036
		ptox, MV	.62659*	0.0312229	4.64107e-15	0.516919	0.736268
		Col-0, SHAM-MV	.47743*	0.0312229	1.99867e-12	0.36776	0.587108
		ptox, SHAM-MV	.58250*	0.0312229	2.41624e-14	0.472822	0.692171
	Col-0, MV	Col-0, DMSO	-.67377*	0.0312229	8.87636e-16	-0.783444	-0.564096
		ptox, DMSO	-.68182*	0.0312229	6.76525e-16	-0.791489	-0.572141
		Col-0, SHAM	-.58489*	0.0312229	2.203e-14	-0.694566	-0.475218
		ptox, SHAM	-.49936*	0.0312229	7.46327e-13	-0.609036	-0.389688
		ptox, MV	.12723*	0.0312229	0.012206	0.0175573	0.236906
		Col-0, SHAM-MV	-0.021928	0.0312229	1	-0.131602	0.0877463
		ptox, SHAM-MV	0.0831346	0.0312229	0.381442	-0.0265396	0.192809
	ptox, MV	Col-0, DMSO	-.80100*	0.0312229	1.65071e-17	-0.910676	-0.691328
		ptox, DMSO	-.80905*	0.0312229	1.30917e-17	-0.918721	-0.699373
		Col-0, SHAM	-.71212*	0.0312229	2.49463e-16	-0.821798	-0.602449
		ptox, SHAM	-.62659*	0.0312229	4.64107e-15	-0.736268	-0.516919
		Col-0, MV	-.12723*	0.0312229	0.012206	-0.236906	-0.0175573
		Col-0, SHAM-MV	-.14916*	0.0312229	0.00204868	-0.258834	-0.0394853
		ptox, SHAM-MV	-0.044097	0.0312229	1	-0.153771	0.0655773
	Col-0, SHAM-MV	Col-0, DMSO	-.65184*	0.0312229	1.88939e-15	-0.761516	-0.542168
		ptox, DMSO	-.65989*	0.0312229	1.42827e-15	-0.769561	-0.550213
		Col-0, SHAM	-.56296*	0.0312229	5.19851e-14	-0.672638	-0.45329
		ptox, SHAM	-.47743*	0.0312229	1.99867e-12	-0.587108	-0.36776
		Col-0, MV	0.021928	0.0312229	1	-0.0877463	0.131602
		ptox, MV	.14916*	0.0312229	0.00204868	0.0394853	0.258834
		ptox, SHAM-MV	0.105063	0.0312229	0.0719496	-0.00461165	0.214737
	ptox, SHAM-MV	Col-0, DMSO	-.75690*	0.0312229	6.12047e-17	-0.866579	-0.647231
		ptox, DMSO	-.76495*	0.0312229	4.79403e-17	-0.874624	-0.655276
		Col-0, SHAM	-.66803*	0.0312229	1.07952e-15	-0.777701	-0.558352
		ptox, SHAM	-.58250*	0.0312229	2.41624e-14	-0.692171	-0.472822
		Col-0, MV	-0.0831346	0.0312229	0.381442	-0.192809	0.0265396
		ptox, MV	0.044097	0.0312229	1	-0.0655773	0.153771
		Col-0, SHAM-MV	-0.105063	0.0312229	0.0719496	-0.214737	0.00461165
VAR00012	Col-0, DMSO	ptox, DMSO	-0.00914519	0.0327037	1	-0.124021	0.10573
		Col-0, SHAM	0.102689	0.0327037	0.124307	-0.0121863	0.217565
		ptox, SHAM	.18587*	0.0327037	0.000208766	0.0709959	0.300747
		Col-0, MV	.69969*	0.0327037	1.0803e-15	0.58481	0.814562
		ptox, MV	.83341*	0.0327037	1.92711e-17	0.71853	0.948282
		Col-0, SHAM-MV	.67518*	0.0327037	2.43656e-15	0.560301	0.790052
		ptox, SHAM-MV	.79747*	0.0327037	5.34428e-17	0.682594	0.912345
	ptox, DMSO	Col-0, DMSO	0.00914519	0.0327037	1	-0.10573	0.124021
		Col-0, SHAM	0.111834	0.0327037	0.0629012	-0.00304115	0.22671
		ptox, SHAM	.19502*	0.0327037	0.000104462	0.0801411	0.309892
		Col-0, MV	.70883*	0.0327037	8.02781e-16	0.593956	0.823707
		ptox, MV	.84255*	0.0327037	1.49628e-17	0.727675	0.957427
		Col-0, SHAM-MV	.68432*	0.0327037	1.79326e-15	0.569446	0.799198
		ptox, SHAM-MV	.80661*	0.0327037	4.10607e-17	0.691739	0.921491
	Col-0, SHAM	Col-0, DMSO	-0.102689	0.0327037	0.124307	-0.217565	0.0121863
		ptox, DMSO	-0.111834	0.0327037	0.0629012	-0.22671	0.00304115
		ptox, SHAM	0.0831823	0.0327037	0.499344	-0.0316934	0.198058
		Col-0, MV	.59700*	0.0327037	3.93969e-14	0.482121	0.711872
		ptox, MV	.73072*	0.0327037	3.99986e-16	0.615841	0.845592
		Col-0, SHAM-MV	.57249*	0.0327037	1.00703e-13	0.457612	0.687363
		ptox, SHAM-MV	.69478*	0.0327037	1.26865e-15	0.579905	0.809656
	ptox, SHAM	Col-0, DMSO	-.18587*	0.0327037	0.000208766	-0.300747	-0.0709959
		ptox, DMSO	-.19502*	0.0327037	0.000104462	-0.309892	-0.0801411
		Col-0, SHAM	-0.0831823	0.0327037	0.499344	-0.198058	0.0316934
		Col-0, MV	.51381*	0.0327037	1.10394e-12	0.398939	0.62869
		ptox, MV	.64753*	0.0327037	6.29867e-15	0.532659	0.76241
		Col-0, SHAM-MV	.48931*	0.0327037	3.2135e-12	0.37443	0.604181
		ptox, SHAM-MV	.61160*	0.0327037	2.28831e-14	0.496722	0.726474
	Col-0, MV	Col-0, DMSO	-.69969*	0.0327037	1.0803e-15	-0.814562	-0.58481
		ptox, DMSO	-.70883*	0.0327037	8.02781e-16	-0.823707	-0.593956
		Col-0, SHAM	-.59700*	0.0327037	3.93969e-14	-0.711872	-0.482121
		ptox, SHAM	-.51381*	0.0327037	1.10394e-12	-0.62869	-0.398939
		ptox, MV	.13372*	0.0327037	0.0117843	0.0188441	0.248595
		Col-0, SHAM-MV	-0.0245093	0.0327037	1	-0.139385	0.0903664
		ptox, SHAM-MV	0.0977836	0.0327037	0.177942	-0.017092	0.212659
	ptox, MV	Col-0, DMSO	-.83341*	0.0327037	1.92711e-17	-0.948282	-0.71853
		ptox, DMSO	-.84255*	0.0327037	1.49628e-17	-0.957427	-0.727675
		Col-0, SHAM	-.73072*	0.0327037	3.99986e-16	-0.845592	-0.615841
		ptox, SHAM	-.64753*	0.0327037	6.29867e-15	-0.76241	-0.532659
		Col-0, MV	-.13372*	0.0327037	0.0117843	-0.248595	-0.0188441
		Col-0, SHAM-MV	-.15823*	0.0327037	0.00175447	-0.273105	-0.0433534
		ptox, SHAM-MV	-0.0359362	0.0327037	1	-0.150812	0.0789395
	Col-0, SHAM-MV	Col-0, DMSO	-.67518*	0.0327037	2.43656e-15	-0.790052	-0.560301
		ptox, DMSO	-.68432*	0.0327037	1.79326e-15	-0.799198	-0.569446
		Col-0, SHAM	-.57249*	0.0327037	1.00703e-13	-0.687363	-0.457612
		ptox, SHAM	-.48931*	0.0327037	3.2135e-12	-0.604181	-0.37443
		Col-0, MV	0.0245093	0.0327037	1	-0.0903664	0.139385
		ptox, MV	.15823*	0.0327037	0.00175447	0.0433534	0.273105
		ptox, SHAM-MV	.12229*	0.0327037	0.0284222	0.00741725	0.237169
	ptox, SHAM-MV	Col-0, DMSO	-.79747*	0.0327037	5.34428e-17	-0.912345	-0.682594
		ptox, DMSO	-.80661*	0.0327037	4.10607e-17	-0.921491	-0.691739
		Col-0, SHAM	-.69478*	0.0327037	1.26865e-15	-0.809656	-0.579905
		ptox, SHAM	-.61160*	0.0327037	2.28831e-14	-0.726474	-0.496722
		Col-0, MV	-0.0977836	0.0327037	0.177942	-0.212659	0.017092
		ptox, MV	0.0359362	0.0327037	1	-0.0789395	0.150812
		Col-0, SHAM-MV	-.12229*	0.0327037	0.0284222	-0.237169	-0.00741725
*. The mean difference is significant at the 0.05 level.

## Sheet: Fig. 4 - figure supplement 4B
Source data
	hour
	0	1	2	3	4	5	6	7	8	9	10
Col-0	0.713802	0.619253	0.447525	0.281095	0.155172	0.109718	0.0510204	0	-0.0222222	-0.052356	-0.0538922
Col-0	0.699518	0.64564	0.520531	0.334928	0.203971	0.126733	0.0544218	0.0134048	-0.0282132	-0.0703704	-0.0851064
Col-0	0.705243	0.462306	0.275342	0.176012	0.0916955	0.0576923	0.0109649	-0.026178	-0.044586	-0.109434	-0.12766
Col-0	0.729462	0.480795	0.242531	0.120833	0.0592417	0	-0.0509091	-0.0888889	-0.0765306	-0.0813953	-0.0986842
Col-0	0.672476	0.615467	0.493017	0.307823	0.188462	0.122105	0.0770975	0.0251889	0	-0.0352113	-0.0416667
Col-0	0.742373	0.548039	0.308725	0.193038	0.118738	0.0438596	-0.0129199	-0.045045	-0.0704225	-0.104167	-0.113744
Col-0	0.667922	0.629592	0.513548	0.363924	0.217069	0.130612	0.0643016	0.0125945	-0.0145773	-0.0352113	-0.0851064
rcd1	0.735333	0.714573	0.712343	0.71536	0.722838	0.727891	0.727165	0.733004	0.730867	0.72053	0.726531
rcd1	0.757624	0.751155	0.752369	0.753389	0.762594	0.761697	0.76334	0.769468	0.768995	0.766445	0.764531
rcd1	0.759107	0.749305	0.730636	0.732394	0.745818	0.764646	0.7706	0.775622	0.7795	0.775811	0.779354
rcd1	0.753086	0.747646	0.74923	0.748455	0.754429	0.758956	0.759685	0.758848	0.7586	0.759205	0.756069
rcd1	0.753871	0.741017	0.726066	0.720467	0.735526	0.751564	0.761697	0.76408	0.765113	0.766583	0.77043
rcd1	0.75952	0.761658	0.763951	0.767903	0.765456	0.773847	0.779099	0.776669	0.780637	0.774894	0.77942
rcd1	0.746891	0.73098	0.728253	0.729921	0.74184	0.751105	0.755427	0.753592	0.762973	0.761807	0.758923
rcd1	0.746578	0.744476	0.740866	0.740353	0.749734	0.76188	0.763104	0.764916	0.765514	0.766416	0.770075
AOX-OE	0.702027	0.67718	0.652	0.555263	0.380866	0.225263	0.134571	0.0620155	0.0143678	0.015674	-0.0352113
AOX-OE	0.687142	0.657428	0.59949	0.491366	0.356863	0.230942	0.141487	0.0878553	0.0558659	-0.0161812	-0.0333333
AOX-OE	0.686005	0.681124	0.651528	0.569414	0.445531	0.334928	0.228374	0.153989	0.105882	0.0804124	0.0224215
AOX-OE	0.724304	0.710166	0.689501	0.612011	0.540445	0.452514	0.342903	0.234991	0.152574	0.0854369	0.0591837
AOX-OE	0.664785	0.625725	0.54732	0.431724	0.311582	0.202268	0.120833	0.0657895	0.0324826	0	-0.0295858
AOX-OE	0.695009	0.675559	0.599379	0.430595	0.254325	0.150476	0.0916667	0.0211268	-0.013587	-0.0485437	-0.08
aox1a	0.74813	0.670741	0.457237	0.29597	0.202568	0.140351	0.0773286	0.028866	0	-0.03003	-0.0872727
aox1a	0.746969	0.692078	0.550978	0.340136	0.205457	0.125683	0.0701031	0.02457	-0.015015	-0.0518519	-0.0851064
aox1a	0.738376	0.732806	0.707338	0.607311	0.462709	0.344768	0.244898	0.184158	0.122105	0.0657596	0.036855
aox1a	0.74368	0.722709	0.689236	0.57971	0.444109	0.338954	0.235622	0.157576	0.10515	0.0788863	0.013089
aox1a	0.671789	0.653912	0.575053	0.391724	0.232595	0.143599	0.0857143	0.0291667	0.0112108	-0.0385675	-0.0519031
aox1a	0.726175	0.680633	0.516	0.319398	0.188571	0.132632	0.0770975	0.0485437	0	-0.0501672	-0.0612245
aox1a	0.683209	0.656997	0.60995	0.497368	0.346709	0.233743	0.146067	0.0871287	0.0530786	0.0116009	-0.0241287
aox1a	0.686303	0.676847	0.659306	0.581935	0.428816	0.304	0.203947	0.13981	0.110831	0.0543478	-0.015015
Oneway ANOVA
		Sum of Squares	df	Mean Square	F	Sig.
0 hrs	Between Groups	0.0139393	3	0.00464642	8.1855	0.000578355
	Within Groups	0.014191	25	0.00056764
	Total	0.0281303	28
1 hr	Between Groups	0.11196	3	0.0373199	20.761	5.74489e-07
	Within Groups	0.04494	25	0.0017976
	Total	0.1569	28
2 hrs	Between Groups	0.433913	3	0.144638	23.2852	2.05961e-07
	Within Groups	0.155289	25	0.00621157
	Total	0.589202	28
3 hrs	Between Groups	0.898566	3	0.299522	37.8157	1.91453e-09
	Within Groups	0.198014	25	0.00792057
	Total	1.09658	28
4 hrs	Between Groups	1.46989	3	0.489963	70.4896	2.47346e-12
	Within Groups	0.173771	25	0.00695085
	Total	1.64366	28
5 hrs	Between Groups	1.9912	3	0.663733	116.627	7.9495e-15
	Within Groups	0.142277	25	0.00569107
	Total	2.13348	28
6 hrs	Between Groups	2.49966	3	0.833219	211.814	6.79467e-18
	Within Groups	0.0983433	25	0.00393373
	Total	2.598	28
7 hrs	Between Groups	2.92957	3	0.976522	345.788	1.79742e-20
	Within Groups	0.0706012	25	0.00282405
	Total	3.00017	28
8 hrs	Between Groups	3.22038	3	1.07346	557.23	5.18607e-23
	Within Groups	0.0481605	25	0.00192642
	Total	3.26854	28
9 hrs	Between Groups	3.53092	3	1.17697	682.497	4.25848e-24
	Within Groups	0.0431128	25	0.00172451
	Total	3.57403	28
10 hrs	Between Groups	3.81595	3	1.27198	935.661	8.60873e-26
	Within Groups	0.0339863	25	0.00135945
	Total	3.84994	28
Post Hoc Tests
Multiple Comparisons. Bonferroni
Dependent Variable			Mean Difference (I-J)	Std. Error	Sig.	95% Confidence Interval
						Lower Bound	Upper Bound
0 hrs	Col-0	rcd1	-.04710*	0.0123307	0.00471405	-0.0824281	-0.0117759
		AOX-OE	0.0111874	0.0132551	1	-0.026787	0.0491618
		aox1a	-0.0136795	0.0123307	1	-0.0490056	0.0216466
	rcd1	Col-0	.04710*	0.0123307	0.00471405	0.0117759	0.0824281
		AOX-OE	.05829*	0.0128671	0.000755769	0.0214267	0.0951521
		aox1a	0.0334225	0.0119126	0.0574918	-0.000705729	0.0675508
	AOX-OE	Col-0	-0.0111874	0.0132551	1	-0.0491618	0.026787
		rcd1	-.05829*	0.0128671	0.000755769	-0.0951521	-0.0214267
		aox1a	-0.0248669	0.0128671	0.388146	-0.0617296	0.0119958
	aox1a	Col-0	0.0136795	0.0123307	1	-0.0216466	0.0490056
		rcd1	-0.0334225	0.0119126	0.0574918	-0.0675508	0.000705729
		AOX-OE	0.0248669	0.0128671	0.388146	-0.0119958	0.0617296
1 hr	Col-0	rcd1	-.17102*	0.0219431	2.26273e-07	-0.233881	-0.108152
		AOX-OE	-.09961*	0.0235881	0.00167363	-0.16719	-0.0320353
		aox1a	-.11426*	0.0219431	0.000131037	-0.17712	-0.0513913
	rcd1	Col-0	.17102*	0.0219431	2.26273e-07	0.108152	0.233881
		AOX-OE	.07140*	0.0228976	0.0272102	0.00580512	0.137003
		aox1a	0.0567609	0.0211991	0.0774712	-0.00397195	0.117494
	AOX-OE	Col-0	.09961*	0.0235881	0.00167363	0.0320353	0.16719
		rcd1	-.07140*	0.0228976	0.0272102	-0.137003	-0.00580512
		aox1a	-0.0146432	0.0228976	1	-0.0802422	0.0509558
	aox1a	Col-0	.11426*	0.0219431	0.000131037	0.0513913	0.17712
		rcd1	-0.0567609	0.0211991	0.0774712	-0.117494	0.00397195
		AOX-OE	0.0146432	0.0228976	1	-0.0509558	0.0802422
2 hrs	Col-0	rcd1	-.33779*	0.0407899	7.46664e-08	-0.454648	-0.220932
		AOX-OE	-.22303*	0.0438478	0.00017884	-0.348648	-0.0974098
		aox1a	-.19546*	0.0407899	0.000383305	-0.312321	-0.0786047
	rcd1	Col-0	.33779*	0.0407899	7.46664e-08	0.220932	0.454648
		AOX-OE	0.114761	0.0425642	0.0742006	-0.00718039	0.236703
		aox1a	.14233*	0.0394068	0.00799642	0.0294309	0.255223
	AOX-OE	Col-0	.22303*	0.0438478	0.00017884	0.0974098	0.348648
		rcd1	-0.114761	0.0425642	0.0742006	-0.236703	0.00718039
		aox1a	0.0275657	0.0425642	1	-0.0943758	0.149507
	aox1a	Col-0	.19546*	0.0407899	0.000383305	0.0786047	0.312321
		rcd1	-.14233*	0.0394068	0.00799642	-0.255223	-0.0294309
		AOX-OE	-0.0275657	0.0425642	1	-0.149507	0.0943758
3 hrs	Col-0	rcd1	-.48458*	0.0460606	6.84265e-10	-0.616538	-0.352621
		AOX-OE	-.26111*	0.0495137	0.000110367	-0.402963	-0.119261
		aox1a	-.19774*	0.0460606	0.00139622	-0.329702	-0.0657851
	rcd1	Col-0	.48458*	0.0460606	6.84265e-10	0.352621	0.616538
		AOX-OE	.22347*	0.0480642	0.000554762	0.0857695	0.361166
		aox1a	.28684*	0.0444988	5.68516e-06	0.159352	0.41432
	AOX-OE	Col-0	.26111*	0.0495137	0.000110367	0.119261	0.402963
		rcd1	-.22347*	0.0480642	0.000554762	-0.361166	-0.0857695
		aox1a	0.0633681	0.0480642	1	-0.0743304	0.201067
	aox1a	Col-0	.19774*	0.0460606	0.00139622	0.0657851	0.329702
		rcd1	-.28684*	0.0444988	5.68516e-06	-0.41432	-0.159352
		AOX-OE	-0.0633681	0.0480642	1	-0.201067	0.0743304
4 hrs	Col-0	rcd1	-.59952*	0.043149	1.75218e-12	-0.723132	-0.475898
		AOX-OE	-.23384*	0.0463838	0.00020093	-0.366722	-0.100954
		aox1a	-.16618*	0.043149	0.00435135	-0.289795	-0.0425608
	rcd1	Col-0	.59952*	0.043149	1.75218e-12	0.475898	0.723132
		AOX-OE	.36568*	0.0450259	1.06994e-07	0.236683	0.494671
		aox1a	.43334*	0.0416859	8.74737e-10	0.313912	0.552763
	AOX-OE	Col-0	.23384*	0.0463838	0.00020093	0.100954	0.366722
		rcd1	-.36568*	0.0450259	1.06994e-07	-0.494671	-0.236683
		aox1a	0.0676602	0.0450259	0.872671	-0.0613338	0.196654
	aox1a	Col-0	.16618*	0.043149	0.00435135	0.0425608	0.289795
		rcd1	-.43334*	0.0416859	8.74737e-10	-0.552763	-0.313912
		AOX-OE	-0.0676602	0.0450259	0.872671	-0.196654	0.0613338
5 hrs	Col-0	rcd1	-.67206*	0.0390435	1.3522e-14	-0.783915	-0.560205
		AOX-OE	-.18168*	0.0419705	0.00127352	-0.301917	-0.061436
		aox1a	-.13608*	0.0390435	0.010991	-0.247933	-0.0242226
	rcd1	Col-0	.67206*	0.0390435	1.3522e-14	0.560205	0.783915
		AOX-OE	.49038*	0.0407418	4.03906e-11	0.373662	0.607104
		aox1a	.53598*	0.0377196	1.06204e-12	0.42792	0.644044
	AOX-OE	Col-0	.18168*	0.0419705	0.00127352	0.061436	0.301917
		rcd1	-.49038*	0.0407418	4.03906e-11	-0.607104	-0.373662
		aox1a	0.045599	0.0407418	1	-0.0711217	0.16232
	aox1a	Col-0	.13608*	0.0390435	0.010991	0.0242226	0.247933
		rcd1	-.53598*	0.0377196	1.06204e-12	-0.644044	-0.42792
		AOX-OE	-0.045599	0.0407418	1	-0.16232	0.0711217
6 hrs	Col-0	rcd1	-.73230*	0.0324604	2.32759e-17	-0.825299	-0.639308
		AOX-OE	-.14893*	0.0348939	0.0014898	-0.248895	-0.048961
		aox1a	-.11489*	0.0324604	0.00959821	-0.207882	-0.0218908
	rcd1	Col-0	.73230*	0.0324604	2.32759e-17	0.639308	0.825299
		AOX-OE	.58338*	0.0338724	1.33479e-14	0.486335	0.680416
		aox1a	.61742*	0.0313597	5.87639e-16	0.527575	0.707259
	AOX-OE	Col-0	.14893*	0.0348939	0.0014898	0.048961	0.248895
		rcd1	-.58338*	0.0338724	1.33479e-14	-0.680416	-0.486335
		aox1a	0.0340418	0.0338724	1	-0.0629987	0.131082
	aox1a	Col-0	.11489*	0.0324604	0.00959821	0.0218908	0.207882
		rcd1	-.61742*	0.0313597	5.87639e-16	-0.707259	-0.527575
		AOX-OE	-0.0340418	0.0338724	1	-0.131082	0.0629987
7 hrs	Col-0	rcd1	-.77759*	0.0275035	1.01394e-19	-0.85638	-0.698791
		AOX-OE	-.11986*	0.0295653	0.00258805	-0.204556	-0.0351537
		aox1a	-.10304*	0.0275035	0.00568501	-0.181832	-0.0242437
	rcd1	Col-0	.77759*	0.0275035	1.01394e-19	0.698791	0.85638
		AOX-OE	.65773*	0.0286998	1.59849e-17	0.575509	0.739952
		aox1a	.67455*	0.0265709	1.37059e-18	0.598425	0.75067
	AOX-OE	Col-0	.11986*	0.0295653	0.00258805	0.0351537	0.204556
		rcd1	-.65773*	0.0286998	1.59849e-17	-0.739952	-0.575509
		aox1a	0.0168171	0.0286998	1	-0.0654047	0.0990389
	aox1a	Col-0	.10304*	0.0275035	0.00568501	0.0242437	0.181832
		rcd1	-.67455*	0.0265709	1.37059e-18	-0.75067	-0.598425
		AOX-OE	-0.0168171	0.0286998	1	-0.0990389	0.0654047
8 hrs	Col-0	rcd1	-.80068*	0.0227158	4.66281e-22	-0.865753	-0.735597
		AOX-OE	-.09458*	0.0244187	0.00411292	-0.164538	-0.0246243
		aox1a	-.08507*	0.0227158	0.00570483	-0.150148	-0.0199923
	rcd1	Col-0	.80068*	0.0227158	4.66281e-22	0.735597	0.865753
		AOX-OE	.70609*	0.0237039	2.84896e-20	0.638185	0.774003
		aox1a	.71560*	0.0219455	3.13578e-21	0.652734	0.778476
	AOX-OE	Col-0	.09458*	0.0244187	0.00411292	0.0246243	0.164538
		rcd1	-.70609*	0.0237039	2.84896e-20	-0.774003	-0.638185
		aox1a	0.00951075	0.0237039	1	-0.0583981	0.0774196
	aox1a	Col-0	.08507*	0.0227158	0.00570483	0.0199923	0.150148
		rcd1	-.71560*	0.0219455	3.13578e-21	-0.778476	-0.652734
		AOX-OE	-0.00951075	0.0237039	1	-0.0774196	0.0583981
9 hrs	Col-0	rcd1	-.83120*	0.0214924	4.7741e-23	-0.89277	-0.769623
		AOX-OE	-.08920*	0.0231036	0.00424515	-0.155391	-0.0230121
		aox1a	-.07473*	0.0214924	0.0112172	-0.136305	-0.013159
	rcd1	Col-0	.83120*	0.0214924	4.7741e-23	0.769623	0.89277
		AOX-OE	.74200*	0.0224273	2.19965e-21	0.677744	0.806247
		aox1a	.75646*	0.0207636	2.07178e-22	0.696979	0.81595
	AOX-OE	Col-0	.08920*	0.0231036	0.00424515	0.0230121	0.155391
		rcd1	-.74200*	0.0224273	2.19965e-21	-0.806247	-0.677744
		aox1a	0.0144691	0.0224273	1	-0.0497824	0.0787207
	aox1a	Col-0	.07473*	0.0214924	0.0112172	0.013159	0.136305
		rcd1	-.75646*	0.0207636	2.07178e-22	-0.81595	-0.696979
		AOX-OE	-0.0144691	0.0224273	1	-0.0787207	0.0497824
10 hrs	Col-0	rcd1	-.84972*	0.0190824	1.47738e-24	-0.904387	-0.795049
		AOX-OE	-.07046*	0.020513	0.0124615	-0.129231	-0.0116965
		aox1a	-0.0522131	0.0190824	0.0676253	-0.106882	0.00245589
	rcd1	Col-0	.84972*	0.0190824	1.47738e-24	0.795049	0.904387
		AOX-OE	.77925*	0.0199125	3.56886e-23	0.722207	0.836301
		aox1a	.79751*	0.0184354	3.01726e-24	0.74469	0.85032
	AOX-OE	Col-0	.07046*	0.020513	0.0124615	0.0116965	0.129231
		rcd1	-.77925*	0.0199125	3.56886e-23	-0.836301	-0.722207
		aox1a	0.0182508	0.0199125	1	-0.0387962	0.0752977
	aox1a	Col-0	0.0522131	0.0190824	0.0676253	-0.00245589	0.106882
		rcd1	-.79751*	0.0184354	3.01726e-24	-0.85032	-0.74469
		AOX-OE	-0.0182508	0.0199125	1	-0.0752977	0.0387962
*. The mean difference is significant at the 0.05 level.

## Sheet: Fig. 4 - figure supplement 4C
Source data
	hour
	0	1	2	3	4	5	6	7	8	9	10	11	12	13	14	15
Col-0	0.767824	0.397073	0.232791	0.145833	0.074199	0.0285714	0	-0.0424929	-0.0789474	-0.0537634	-0.0588235	-0.0851064	-0.111111	-0.0859729	-0.0633484	-0.0648148
Col-0	0.76865	0.421152	0.197733	0.122781	0.0641447	0.0270758	0.019802	-0.0110865	-0.0503778	-0.0609756	-0.0657895	-0.0896057	-0.111538	-0.0816327	-0.108696	-0.108597
Col-0	0.770812	0.432487	0.224161	0.152648	0.0949033	0.0576923	0.0291667	-0.0117371	-0.0107239	-0.0432099	-0.0334448	-0.0509091	-0.0588235	-0.106383	-0.0888889	-0.0859729
Col-0	0.774964	0.406015	0.222222	0.1398	0.079288	0.035461	0.0196078	-0.021327	-0.0679887	-0.0595611	-0.0510204	-0.0518519	-0.0941176	-0.102041	-0.0833333	-0.0851064
Col-0	0.762881	0.388119	0.179221	0.0891239	0.0489039	0.0185529	0	-0.0109649	-0.021327	-0.0397878	-0.058309	-0.083612	-0.0896057	-0.0941176	-0.0833333	-0.0888889
Col-0	0.777778	0.413462	0.22619	0.147627	0.0888889	0.0538117	0.0336323	0.00938967	-0.0244565	-0.0304878	-0.0501672	-0.0703704	-0.06	-0.108696	-0.0888889	-0.087963
Col-0	0.780773	0.449953	0.234432	0.13881	0.0917722	0.058319	0.0445269	0.010101	-0.0110865	-0.0255102	-0.0437318	-0.0776699	-0.0716846	-0.0784314	-0.0625	-0.0652174
Col-0	0.787894	0.454981	0.230867	0.146927	0.0986622	0.0619308	0.0392157	0.0318471	0.00938967	-0.013089	-0.0457317	-0.0510204	-0.0358423	-0.0576923	-0.0612245	-0.0652174
Col-0	0.766736	0.4	0.205229	0.126332	0.0833333	0.0355805	0.0206186	-0.0117371	-0.013089	-0.0287356	-0.0605096	-0.0692042	-0.0923077	-0.0816327	-0.0851064	-0.0666667
Col-0	0.783638	0.384525	0.188563	0.115523	0.0897959	0.0554324	0.036855	0.0137741	-0.015674	-0.017301	-0.0192308	-0.0434783	-0.0648148	-0.0995025	-0.0765306	-0.0806452
Col-0	0.774432	0.387022	0.191904	0.130053	0.078	0.0642722	0.0224215	-0.0275482	-0.0328947	-0.0528302	-0.0638298	-0.0648148	-0.0746269	-0.078534	-0.0806452	-0.0852273
Col-0	0.779598	0.419634	0.242274	0.164464	0.106136	0.0543071	0.0443459	0	-0.0277778	-0.0519031	-0.0145455	-0.0392157	-0.0638298	-0.0666667	-0.0222222	-0.0648148
Col-0	0.773521	0.419156	0.180822	0.10675	0.0780142	0.038835	0.0189474	0.0224215	0	-0.0129199	-0.0143678	-0.0358423	-0.06	-0.0638298	-0.0666667	-0.0416667
Col-0	0.794728	0.469094	0.259096	0.185714	0.135569	0.0954693	0.0808824	0.0328947	0.0125945	0	-0.015015	-0.0323625	-0.0346021	-0.0327273	-0.0192308	-0.0196078
Col-0	0.774628	0.408885	0.204057	0.129888	0.0847724	0.0522648	0.0192308	0.0206186	-0.0116009	-0.0129199	-0.058309	-0.0438871	-0.0668896	-0.0690909	-0.0528302	-0.08
Col-0	0.798281	0.462713	0.248821	0.175172	0.120556	0.114428	0.0801457	0.0484848	0.0229358	0.0251889	0	-0.0152439	-0.0485437	-0.0519031	-0.0358423	-0.0377358
rcd1	0.763646	0.723931	0.716617	0.731974	0.740015	0.736377	0.73516	0.727778	0.720892	0.720137	0.710247	0.701275	0.695489	0.694849	0.687562	0.683077
rcd1	0.760996	0.729013	0.711692	0.716134	0.726339	0.728012	0.742794	0.74277	0.738824	0.736546	0.73551	0.731343	0.727816	0.727431	0.727032	0.725821
rcd1	0.764463	0.724003	0.716114	0.710757	0.708434	0.697752	0.686515	0.66636	0.653772	0.642	0.627692	0.621564	0.606291	0.593049	0.594104	0.581797
rcd1	0.768004	0.74355	0.752483	0.746677	0.733278	0.712094	0.696325	0.674948	0.646341	0.623821	0.600751	0.570861	0.545076	0.528736	0.504464	0.48554
rcd1	0.759723	0.711373	0.702079	0.683305	0.658205	0.61608	0.588735	0.559908	0.533578	0.507097	0.487248	0.477115	0.452276	0.446677	0.436893	0.433673
rcd1	0.767224	0.741348	0.730602	0.740165	0.753472	0.748399	0.756318	0.757914	0.759207	0.757046	0.754902	0.753695	0.751244	0.756219	0.751244	0.756219
rcd1	0.762914	0.727032	0.710938	0.715939	0.72344	0.728741	0.739635	0.742685	0.744834	0.744739	0.743948	0.739089	0.745042	0.746169	0.742612	0.748549
rcd1	0.772099	0.737083	0.715743	0.715553	0.720656	0.722559	0.732237	0.731757	0.727019	0.726888	0.720981	0.717105	0.716617	0.712349	0.71309	0.71089
rcd1	0.752106	0.710247	0.699222	0.695733	0.691134	0.664564	0.664859	0.653534	0.638821	0.631378	0.626316	0.613605	0.607595	0.596237	0.596182	0.602699
rcd1	0.774725	0.747683	0.73	0.722803	0.733668	0.735	0.754572	0.752145	0.75	0.751244	0.744898	0.748954	0.741117	0.739854	0.739639	0.738248
rcd1	0.764706	0.72546	0.709285	0.7056	0.719939	0.72546	0.73716	0.73493	0.734661	0.731452	0.727273	0.725021	0.721572	0.716837	0.716837	0.721088
rcd1	0.777664	0.744713	0.7287	0.723338	0.730328	0.738935	0.747384	0.743745	0.740654	0.731746	0.735484	0.727273	0.725753	0.716837	0.713425	0.714037
rcd1	0.762536	0.715918	0.695968	0.693929	0.704377	0.711837	0.734661	0.733333	0.731029	0.728608	0.724844	0.718579	0.716946	0.718985	0.717036	0.719145
rcd1	0.781904	0.749614	0.749269	0.752967	0.756303	0.745817	0.739635	0.728608	0.723614	0.707635	0.697786	0.682587	0.672821	0.661088	0.653846	0.645788
rcd1	0.763317	0.725	0.704027	0.704067	0.716	0.721424	0.723901	0.717839	0.716067	0.716114	0.707525	0.70315	0.699194	0.699592	0.706798	0.703151
rcd1	0.768922	0.735526	0.719948	0.723317	0.735543	0.738816	0.743623	0.740313	0.741935	0.739224	0.733676	0.733433	0.728582	0.729294	0.730023	0.725078
rcd1 aox1a	0.759544	0.708943	0.690116	0.679139	0.665366	0.652	0.653535	0.640201	0.643781	0.640594	0.633831	0.630151	0.622564	0.617066	0.610994	0.604726
rcd1 aox1a	0.769009	0.717033	0.68813	0.68	0.664096	0.649374	0.638042	0.625118	0.610153	0.608277	0.586275	0.584236	0.571144	0.565306	0.556712	0.544872
rcd1 aox1a	0.77421	0.717073	0.695652	0.677632	0.652	0.628812	0.62419	0.607456	0.607456	0.606291	0.610097	0.619554	0.610097	0.606291	0.604144	0.599779
rcd1 aox1a	0.767232	0.71417	0.694946	0.688494	0.67795	0.665327	0.658462	0.648283	0.637421	0.633547	0.628205	0.627983	0.614191	0.601375	0.592028	0.588235
rcd1 aox1a	0.779941	0.735075	0.710712	0.690374	0.678317	0.66306	0.666667	0.680117	0.704997	0.713599	0.710618	0.709245	0.702568	0.707615	0.702956	0.699927
rcd1 aox1a	0.764892	0.713396	0.69965	0.690759	0.684061	0.670244	0.663682	0.656853	0.644928	0.635494	0.610805	0.58992	0.563464	0.538937	0.516046	0.497333
rcd1 aox1a	0.778245	0.727335	0.706561	0.6864	0.674494	0.662415	0.670813	0.677632	0.698024	0.70315	0.699194	0.69199	0.689713	0.683305	0.677758	0.672306
rcd1 aox1a	0.78439	0.745307	0.720656	0.698812	0.682048	0.669447	0.670362	0.674058	0.681614	0.674561	0.670055	0.6624	0.659592	0.655518	0.653912	0.655527
rcd1 aox1a	0.775313	0.723589	0.699767	0.68325	0.669877	0.656783	0.648897	0.658318	0.661047	0.67338	0.677758	0.674912	0.672383	0.662011	0.653956	0.645854
rcd1 aox1a	0.788871	0.748968	0.732453	0.721119	0.714026	0.696	0.697786	0.704568	0.73224	0.740165	0.737782	0.734032	0.725338	0.725123	0.723762	0.719598
rcd1 aox1a	0.773763	0.72449	0.70583	0.684312	0.666323	0.640389	0.634868	0.644231	0.665306	0.667	0.669388	0.660455	0.661088	0.651987	0.646674	0.640798
rcd1 aox1a	0.791687	0.741012	0.7176	0.700089	0.686456	0.668279	0.668627	0.662069	0.657	0.655446	0.655446	0.65561	0.665063	0.666667	0.673022	0.663443
rcd1 aox1a	0.77094	0.715323	0.684743	0.671526	0.667005	0.651905	0.644585	0.644585	0.646444	0.64308	0.641607	0.647	0.657143	0.665366	0.663682	0.655102
rcd1 aox1a	0.790314	0.747384	0.726657	0.712585	0.701101	0.683287	0.683746	0.694568	0.712585	0.716508	0.711522	0.700809	0.698096	0.699909	0.699443	0.693171
rcd1 aox1a	0.766152	0.707055	0.677873	0.655382	0.638021	0.61927	0.62194	0.637578	0.661263	0.658239	0.652291	0.652095	0.648976	0.649436	0.655598	0.650626
rcd1 aox1a	0.782209	0.729013	0.709502	0.697752	0.682137	0.66787	0.660203	0.653989	0.651076	0.650278	0.647334	0.650854	0.633625	0.628856	0.62132	0.613872
Univariate Analysis of Variance
Between-Subjects Factors
		Value Label	N
VAR00001	1.00	Col-0	32
	2.00	rcd1	32
	3.00	rcd1 aox1a	32
VAR00002	1.00	0 hrs	48
	2.00	15 hrs	48
Tests of Between-Subjects Effects
Source	Type III Sum of Squares	df	Mean Square	F	Sig.
Corrected Model	8.723a	5	1.74469	791.66	9.40445e-73
Intercept	33.6429	1	33.6429	15265.6	3.04635e-102
VAR00001	2.73464	2	1.36732	620.427	2.26487e-53
VAR00002	3.15628	1	3.15628	1432.17	4.64082e-57
VAR00001 * VAR00002	2.83254	2	1.41627	642.637	5.16891e-54
Error	0.198346	90	0.00220384
Total	42.5647	96
Corrected Total	8.92181	95
a. R Squared = .978 (Adjusted R Squared = .977)
Post Hoc Tests
Multiple Comparisons. Bonferroni
(I) VAR00001		Mean Difference (I-J)	Std. Error	Sig.	95% Confidence Interval
					Lower Bound	Upper Bound
Col-0	rcd1	-.3641*	0.0117363	2.30564e-49	-0.392717	-0.335455
	rcd1 aox1a	-.3517*	0.0117363	4.0022e-48	-0.380284	-0.323021
rcd1	Col-0	.3641*	0.0117363	2.30564e-49	0.335455	0.392717
	rcd1 aox1a	0.0124334	0.0117363	0.876758	-0.0161978	0.0410646
rcd1 aox1a	Col-0	.3517*	0.0117363	4.0022e-48	0.323021	0.380284
	rcd1	-0.0124334	0.0117363	0.876758	-0.0410646	0.0161978
Based on observed means. The error term is Mean Square(Error) = .002.
*. The mean difference is significant at the 0.05 level.
