# Supplementary material for: Arabidopsis RCD1 coordinates chloroplast and mitochondrial functions through interaction with ANAC transcription factors
Source: eLife journal article supplement (doi:10.7554/elife.43284), 2019-02-15
Supplement: supp [file elife-43284-supp-v1.zip › elife_poa_e43284_Figure_5_source_data_1.xlsx]

## Sheet: Fig. 5B
Compound	Corrected p-value (line)	Corrected p-value (treatment)	Corrected p-value (line-treatment)	p-value (line)	p-value (treatment)	p-value (line-treatment)	SSRatio (line)	SSRatio (line-treatment)	SSRatio (treatment)
Malic acid (3TMS)	1.01735e-07	2.90179e-23	9.6478e-13	3.44619e-08	8.59355e-24	2.83759e-13	2.78898	7.79245	31.8273
For Malate p<0.001 between lines, treatments and LxT interaction
For Fumarate p<0.001 between treatments and LxT interaction, no significance between the lines

## Sheet: Fig. 5C
Source data			Oneway ANOVA
Initial activity (nmol/g FW/min)				Sum of Squares	df	Mean Square	F	Sig.
Col-0	83.831		Between Groups	7385.53	1	7385.53	32.24	0.00474788
	51.2263		Within Groups	916.32	4	229.08
	75.6378		Total	8301.85	5
rcd1	126.151
	151.789
	143.262
Total activity (nmol/g FW/min)				Sum of Squares	df	Mean Square	F	Sig.
Col-0	1578.72		Between Groups	154288	1	154288	26.5859	0.00671587
	1556.77		Within Groups	23213.5	4	5803.38
	1501.44		Total	177501	5
rcd1	1910.08
	1751.83
	1937.16
Activation state				Sum of Squares	df	Mean Square	F	Sig.
Col-0	0.0531006		Between Groups	0.00138017	1	0.00138017	12.0714	0.0254815
	0.0329054		Within Groups	0.000457333	4	0.000114333
	0.0503769		Total	0.0018375	5
rcd1	0.0660447
	0.0866461
	0.0739545

## Sheet: Fig. 5 - figure supplement 1
Source data			Oneway ANOVA
	qP at 160 min			Sum of Squares	df	Mean Square	F	Sig.
Col-0, MV plus DMSO	0.501532		Between Groups	0.838969	1	0.838969	18.6825	0.000828304
	0.19408		Within Groups	0.583785	13	0.0449066
	0.830418		Total	1.42275	14
	1.0372
	0.468302
	0.566374
	0.849785
	0.467227
Col-0, MV plus SHAM	0.102424
	0.30453
	0.0189232
	0.034773
	0.220514
	0.211006
	0.0900311			Sum of Squares	df	Mean Square	F	Sig.
rcd1, MV plus DMSO	1.20491		Between Groups	0.59156	1	0.59156	26.9184	0.000137498
	1.20821		Within Groups	0.307665	14	0.0219761
	1.20515		Total	0.899225	15
	0.995892
	1.26983
	1.11355
	1.22045
	1.25017
rcd1, MV plus SHAM	0.960138
	0.758548
	0.751801
	0.428398
	1.01623
	0.833772
	0.955909
	0.686845

## Sheet: Fig. 5 - figure supplement 2
Source data					Oneway ANOVA
		Col-0	rcd1			Sum of Squares	df	Mean Square	F	Sig.
Malate	plastid	18	0		Between Groups	36.125	1	36.125	0.436336	0.533421
		0	11		Within Groups	496.75	6	82.7917
		12	0		Total	532.875	7
		18	20
	cytosol	26	0		Between Groups	21.125	1	21.125	0.0697674	0.800514
		0	0		Within Groups	1816.75	6	302.792
		0	39		Total	1837.88	7
		26	0
	vacuole /apoplast	56	100		Between Groups	112.5	1	112.5	0.289327	0.610008
		100	89		Within Groups	2333	6	388.833
		88	61		Total	2445.5	7
		56	80
