# Supplementary material for: Arabidopsis RCD1 coordinates chloroplast and mitochondrial functions through interaction with ANAC transcription factors
Source: eLife journal article supplement (doi:10.7554/elife.43284), 2019-02-15
Supplement: supp [file elife-43284-supp-v1.zip › elife_poa_e43284_Figure_6_source_data_1.xlsx]

## Sheet: Fig. 6 - figure supplement 2
Source data
		AT3G22370 (AOX1a)			AT2G21640 (UPOX)			AT1G32870 (ANAC013)			At5G24640 (OER2)				AT1G32230 (RCD1) exon 4
		repeat			repeat			repeat			repeat				repeat
Genotype	Treatment	1	2	3	1	2	3	1	2	3	1	2	3		1	2	3
Col-0	control	1	1	1	1	1	1	1	1	1	1	1	1		1	1	1
rcd1-4	control	6.03709	6.11341	10.5277	24.5537	23.8957	48.2956	2.60474	1.83561	1.97413	1.85185	3.58946	5.51267		0.0187383	0.0185183	0.00780226
rcd1-1	control	1.75708	6.0296	9.74455	27.6652	15.0023	48.9055	5.4143	2.15729	1.77722	1.80151	3.44873	4.64593		1.43193	2.64914	1.93285
anac017	control	0.642035	0.563903	0.72641	0.93051	0.775657	1.70796	0.825497	0.93212	0.862262	0.756719	1.09649	0.457931		0.906667	1.42272	0.945872
rcd1-1 anac017	control	1.07764	0.98833	1.76685	4.68964	5.78879	8.86602	1.19349	1.02336	0.7686	0.0326569	1.24268	0.504573		1.07316	1.38388	1.03833
WT RCD1-HA low (#2.1)	control	1.81811	1.07203	1.55561	0.767394	1.09047	0.875062	1.16987	1.0699	0.866801	0.795615	1.29817	0.795693		2.32373	2.38439	1.25371
WT RCD1-HA low (#4.1)	control	3.61469	3.76699	5.95468	10.7494	10.0872	19.5417	1.58246	1.5196	1.50554	1.4056	3.00545	3.15542		1.73458	3.47674	2.15134
WT RCD1-HA high (#1.2)	control	0.940409	0.669497	1.09759	0.372075	0.4721	0.493948	0.905867	0.962708	0.944089	0.7348	1.28916	0.740324		8.18902	10.3738	8.64269
WT RCD1-HA high (#RIL)	control	0.792702	0.711082	0.911708	0.37858	0.524666	0.474859	0.87958	1.10018	0.969745	0.679276	1.34452	0.787547		7.97067	10.1094	7.53681
RCD1-dCys-HA (#5.2)	control	1.7388	0.991114	1.43695	0.48016	0.800069	0.731091	0.952564	1.06519	0.880455	0.71305	1.17977	0.47704		5.71982	6.71648	4.41398
RCD1-dCys-HA (#6.4)	control	1.17108	1.01426	0.963615	0.431214	0.382001	0.456647	0.715608	0.949825	0.742382	0.556571	1.2964	0.416657		5.83511	6.97585	5.41307
Col-0	antimycin A 50 μM, 3 hours	16.5801	19.5887	23.4632	38.5469	43.2113	42.3209	2.762	4.0184	2.76524	5.59763	20.2539	20.1065		3.56385	4.97144	2.52362
rcd1-4	antimycin A 50 μM, 3 hours	12.7896	11.2167	17.3969	34.7974	55.7786	74.2376	2.34993	2.77151	2.35078	4.2355	10.155	15.0612		0.0076567	0.0179231	0.00931198
rcd1-1	antimycin A 50 μM, 3 hours	12.2035	13.0127	16.9789	39.8342	56.2337	74.0717	2.46155	2.75376	1.98976	4.40393	10.1513	14.3958		3.74134	4.91899	3.02435
anac017	antimycin A 50 μM, 3 hours	3.25015	3.69562	4.76633	0.898838	0.869032	1.3384	0.70239	1.53749	1.33931	0.224751	0.758814	0.434662		0.827859	1.14599	0.81173
rcd1-1 anac017	antimycin A 50 μM, 3 hours	3.91503	3.06353	4.79726	3.79338	6.84419	0.77664	0.922856	0.000486765	1.43111	0.264861	0.705238	0.695158		1.63104	1.9288	1.38048
WT RCD1-HA low (#2.1)	antimycin A 50 μM, 3 hours	19.5485	17.4266	28.6797	31.925	42.2937	54.3959	2.85854	3.19896	2.32695	7.20492	17.0063	24.9539		5.86348	5.34348	4.68366
WT RCD1-HA low (#4.1)	antimycin A 50 μM, 3 hours	14.9559	15.5697	19.2867	34.8726	63.0253	64.3037	2.45624	3.24216	2.40999	6.08078	15.3808	18.2768		3.1541	5.05477	2.36421
WT RCD1-HA high (#1.2)	antimycin A 50 μM, 3 hours	26.803	14.987	25.044	8.95679	18.9381	15.4469	2.90618	2.89919	2.82468	4.38385	5.73822	9.69401		18.218	21.464	13.5467
WT RCD1-HA high (#RIL)	antimycin A 50 μM, 3 hours	21.3787	14.2421	19.2569	8.06382	18.4429	10.7853	2.54034	2.65387	1.82214	3.71997	5.02688	7.10317		16.9713	18.8666	10.1387
RCD1-dCys-HA (#5.2)	antimycin A 50 μM, 3 hours	21.3107	16.1969	24.1337	13.4793	26.2342	25.3443	2.43952	2.72676	2.05814	5.11363	7.7285	14.6674		15.533	14.5809	10.5708
RCD1-dCys-HA (#6.4)	antimycin A 50 μM, 3 hours	23.6561	17.0362	26.6422	7.21842	10.1934	9.68209	1.62382	2.27642	2.40965	5.22832	9.56335	14.4056		10.1999	12.6625	7.47583
Oneway ANOVA								Oneway ANOVA
	Sum of Squares	df	Mean Square	F	Sig.				Sum of Squares	df	Mean Square	F	Sig.
Between Groups	7621.95	7	1088.85	9.60715	0.000103597			Between Groups	331.022	7	47.2888	1.37116	0.282665
Within Groups	1813.4	16	113.337					Within Groups	551.811	16	34.4882
Total	9435.34	23						Total	882.833	23
Post Hoc Tests								Post Hoc Tests
Dependent Variable: AT2G21640 (UPOX), antimycin A								Dependent Variable: At5G24640 (OER2), antimycin A
Bonferroni								Tukey HSD
		Mean Difference (I-J)	Std. Error	Sig.	95% Confidence Interval					Mean Difference (I-J)	Std. Error	Sig.	95% Confidence Interval
					Lower Bound	Upper Bound							Lower Bound	Upper Bound
Col-0	rcd1-4	-13.58	8.69243	1	-46.0881	18.9281		Col-0	rcd1-4	5.5	4.79501	0.935797	-11.101	22.101
	WT RCD1-HA low (#2.1)	-1.51	8.69243	1	-34.0181	30.9981			WT RCD1-HA low (#2.1)	-1.06667	4.79501	0.999998	-17.6677	15.5344
	WT RCD1-HA low (#4.1)	-12.7067	8.69243	1	-45.2148	19.8015			WT RCD1-HA low (#4.1)	2.07333	4.79501	0.999804	-14.5277	18.6744
	WT RCD1-HA high (#1.2)	26.91	8.69243	0.194339	-5.59814	59.4181			WT RCD1-HA high (#1.2)	8.71667	4.79501	0.618153	-7.88438	25.3177
	WT RCD1-HA high (#RIL)	28.93	8.69243	0.119244	-3.57814	61.4381			WT RCD1-HA high (#RIL)	10.0367	4.79501	0.457821	-6.56438	26.6377
	RCD1-dCys-HA (#5.2)	19.6767	8.69243	1	-12.8315	52.1848			RCD1-dCys-HA (#5.2)	6.15	4.79501	0.892643	-10.451	22.751
	RCD1-dCys-HA (#6.4)	32.33	8.69243	0.052211	-0.178143	64.8381			RCD1-dCys-HA (#6.4)	5.58667	4.79501	0.930818	-11.0144	22.1877
rcd1-4	Col-0	13.58	8.69243	1	-18.9281	46.0881		rcd1-4	Col-0	-5.5	4.79501	0.935797	-22.101	11.101
	WT RCD1-HA low (#2.1)	12.07	8.69243	1	-20.4381	44.5781			WT RCD1-HA low (#2.1)	-6.56667	4.79501	0.858057	-23.1677	10.0344
	WT RCD1-HA low (#4.1)	0.873333	8.69243	1	-31.6348	33.3815			WT RCD1-HA low (#4.1)	-3.42667	4.79501	0.995206	-20.0277	13.1744
	WT RCD1-HA high (#1.2)	40.49000*	8.69243	0.00734931	7.98186	72.9981			WT RCD1-HA high (#1.2)	3.21667	4.79501	0.996736	-13.3844	19.8177
	WT RCD1-HA high (#RIL)	42.51000*	8.69243	0.00457328	10.0019	75.0181			WT RCD1-HA high (#RIL)	4.53667	4.79501	0.976026	-12.0644	21.1377
	RCD1-dCys-HA (#5.2)	33.25667*	8.69243	0.041692	0.748524	65.7648			RCD1-dCys-HA (#5.2)	0.65	4.79501	1	-15.951	17.251
	RCD1-dCys-HA (#6.4)	45.91000*	8.69243	0.0020861	13.4019	78.4181			RCD1-dCys-HA (#6.4)	0.0866667	4.79501	1	-16.5144	16.6877
WT RCD1-HA low (#2.1)	Col-0	1.51	8.69243	1	-30.9981	34.0181		WT RCD1-HA low (#2.1)	Col-0	1.06667	4.79501	0.999998	-15.5344	17.6677
	rcd1-4	-12.07	8.69243	1	-44.5781	20.4381			rcd1-4	6.56667	4.79501	0.858057	-10.0344	23.1677
	WT RCD1-HA low (#4.1)	-11.1967	8.69243	1	-43.7048	21.3115			WT RCD1-HA low (#4.1)	3.14	4.79501	0.997186	-13.461	19.741
	WT RCD1-HA high (#1.2)	28.42	8.69243	0.134931	-4.08814	60.9281			WT RCD1-HA high (#1.2)	9.78333	4.79501	0.487555	-6.81771	26.3844
	WT RCD1-HA high (#RIL)	30.44	8.69243	0.0826472	-2.06814	62.9481			WT RCD1-HA high (#RIL)	11.1033	4.79501	0.34267	-5.49771	27.7044
	RCD1-dCys-HA (#5.2)	21.1867	8.69243	0.751583	-11.3215	53.6948			RCD1-dCys-HA (#5.2)	7.21667	4.79501	0.794427	-9.38438	23.8177
	RCD1-dCys-HA (#6.4)	33.84000*	8.69243	0.0361921	1.33186	66.3481			RCD1-dCys-HA (#6.4)	6.65333	4.79501	0.850221	-9.94771	23.2544
WT RCD1-HA low (#4.1)	Col-0	12.7067	8.69243	1	-19.8015	45.2148		WT RCD1-HA low (#4.1)	Col-0	-2.07333	4.79501	0.999804	-18.6744	14.5277
	rcd1-4	-0.873333	8.69243	1	-33.3815	31.6348			rcd1-4	3.42667	4.79501	0.995206	-13.1744	20.0277
	WT RCD1-HA low (#2.1)	11.1967	8.69243	1	-21.3115	43.7048			WT RCD1-HA low (#2.1)	-3.14	4.79501	0.997186	-19.741	13.461
	WT RCD1-HA high (#1.2)	39.61667*	8.69243	0.00903736	7.10852	72.1248			WT RCD1-HA high (#1.2)	6.64333	4.79501	0.851136	-9.95771	23.2444
	WT RCD1-HA high (#RIL)	41.63667*	8.69243	0.00561048	9.12852	74.1448			WT RCD1-HA high (#RIL)	7.96333	4.79501	0.710078	-8.63771	24.5644
	RCD1-dCys-HA (#5.2)	32.3833	8.69243	0.051539	-0.124809	64.8915			RCD1-dCys-HA (#5.2)	4.07667	4.79501	0.986741	-12.5244	20.6777
	RCD1-dCys-HA (#6.4)	45.03667*	8.69243	0.00254772	12.5285	77.5448			RCD1-dCys-HA (#6.4)	3.51333	4.79501	0.99443	-13.0877	20.1144
WT RCD1-HA high (#1.2)	Col-0	-26.91	8.69243	0.194339	-59.4181	5.59814		WT RCD1-HA high (#1.2)	Col-0	-8.71667	4.79501	0.618153	-25.3177	7.88438
	rcd1-4	-40.49000*	8.69243	0.00734931	-72.9981	-7.98186			rcd1-4	-3.21667	4.79501	0.996736	-19.8177	13.3844
	WT RCD1-HA low (#2.1)	-28.42	8.69243	0.134931	-60.9281	4.08814			WT RCD1-HA low (#2.1)	-9.78333	4.79501	0.487555	-26.3844	6.81771
	WT RCD1-HA low (#4.1)	-39.61667*	8.69243	0.00903736	-72.1248	-7.10852			WT RCD1-HA low (#4.1)	-6.64333	4.79501	0.851136	-23.2444	9.95771
	WT RCD1-HA high (#RIL)	2.02	8.69243	1	-30.4881	34.5281			WT RCD1-HA high (#RIL)	1.32	4.79501	0.999991	-15.281	17.921
	RCD1-dCys-HA (#5.2)	-7.23333	8.69243	1	-39.7415	25.2748			RCD1-dCys-HA (#5.2)	-2.56667	4.79501	0.999211	-19.1677	14.0344
	RCD1-dCys-HA (#6.4)	5.42	8.69243	1	-27.0881	37.9281			RCD1-dCys-HA (#6.4)	-3.13	4.79501	0.997241	-19.731	13.471
WT RCD1-HA high (#RIL)	Col-0	-28.93	8.69243	0.119244	-61.4381	3.57814		WT RCD1-HA high (#RIL)	Col-0	-10.0367	4.79501	0.457821	-26.6377	6.56438
	rcd1-4	-42.51000*	8.69243	0.00457328	-75.0181	-10.0019			rcd1-4	-4.53667	4.79501	0.976026	-21.1377	12.0644
	WT RCD1-HA low (#2.1)	-30.44	8.69243	0.0826472	-62.9481	2.06814			WT RCD1-HA low (#2.1)	-11.1033	4.79501	0.34267	-27.7044	5.49771
	WT RCD1-HA low (#4.1)	-41.63667*	8.69243	0.00561048	-74.1448	-9.12852			WT RCD1-HA low (#4.1)	-7.96333	4.79501	0.710078	-24.5644	8.63771
	WT RCD1-HA high (#1.2)	-2.02	8.69243	1	-34.5281	30.4881			WT RCD1-HA high (#1.2)	-1.32	4.79501	0.999991	-17.921	15.281
	RCD1-dCys-HA (#5.2)	-9.25333	8.69243	1	-41.7615	23.2548			RCD1-dCys-HA (#5.2)	-3.88667	4.79501	0.989912	-20.4877	12.7144
	RCD1-dCys-HA (#6.4)	3.4	8.69243	1	-29.1081	35.9081			RCD1-dCys-HA (#6.4)	-4.45	4.79501	0.978409	-21.051	12.151
RCD1-dCys-HA (#5.2)	Col-0	-19.6767	8.69243	1	-52.1848	12.8315		RCD1-dCys-HA (#5.2)	Col-0	-6.15	4.79501	0.892643	-22.751	10.451
	rcd1-4	-33.25667*	8.69243	0.041692	-65.7648	-0.748524			rcd1-4	-0.65	4.79501	1	-17.251	15.951
	WT RCD1-HA low (#2.1)	-21.1867	8.69243	0.751583	-53.6948	11.3215			WT RCD1-HA low (#2.1)	-7.21667	4.79501	0.794427	-23.8177	9.38438
	WT RCD1-HA low (#4.1)	-32.3833	8.69243	0.051539	-64.8915	0.124809			WT RCD1-HA low (#4.1)	-4.07667	4.79501	0.986741	-20.6777	12.5244
	WT RCD1-HA high (#1.2)	7.23333	8.69243	1	-25.2748	39.7415			WT RCD1-HA high (#1.2)	2.56667	4.79501	0.999211	-14.0344	19.1677
	WT RCD1-HA high (#RIL)	9.25333	8.69243	1	-23.2548	41.7615			WT RCD1-HA high (#RIL)	3.88667	4.79501	0.989912	-12.7144	20.4877
	RCD1-dCys-HA (#6.4)	12.6533	8.69243	1	-19.8548	45.1615			RCD1-dCys-HA (#6.4)	-0.563333	4.79501	1	-17.1644	16.0377
RCD1-dCys-HA (#6.4)	Col-0	-32.33	8.69243	0.052211	-64.8381	0.178143		RCD1-dCys-HA (#6.4)	Col-0	-5.58667	4.79501	0.930818	-22.1877	11.0144
	rcd1-4	-45.91000*	8.69243	0.0020861	-78.4181	-13.4019			rcd1-4	-0.0866667	4.79501	1	-16.6877	16.5144
	WT RCD1-HA low (#2.1)	-33.84000*	8.69243	0.0361921	-66.3481	-1.33186			WT RCD1-HA low (#2.1)	-6.65333	4.79501	0.850221	-23.2544	9.94771
	WT RCD1-HA low (#4.1)	-45.03667*	8.69243	0.00254772	-77.5448	-12.5285			WT RCD1-HA low (#4.1)	-3.51333	4.79501	0.99443	-20.1144	13.0877
	WT RCD1-HA high (#1.2)	-5.42	8.69243	1	-37.9281	27.0881			WT RCD1-HA high (#1.2)	3.13	4.79501	0.997241	-13.471	19.731
	WT RCD1-HA high (#RIL)	-3.4	8.69243	1	-35.9081	29.1081			WT RCD1-HA high (#RIL)	4.45	4.79501	0.978409	-12.151	21.051
	RCD1-dCys-HA (#5.2)	-12.6533	8.69243	1	-45.1615	19.8548			RCD1-dCys-HA (#5.2)	0.563333	4.79501	1	-16.0377	17.1644
*. The mean difference is significant at the 0.05 level.

## Sheet: Fig. 6 - figure supplement 3
Source data
	hours
	0	6	15
Col-0, MV 0.25 μM	0.46408	0.031348	-0.0955414
	0.475329	0.0740741	-0.0442478
	0.461353	0.0497512	-0.0828729
	0.526902	0.0430839	-0.0248756
sal1, MV 0.25 μM	0.623646	0.24898	-0.0633484
	0.626721	0.408163	0.0159236
	0.63881	0.580905	0.467974
	0.625118	0.493045	0.265356
rcd1, MV 20 μM	0.653912	0.184035	-0.0617284
	0.662348	0.182213	-0.0838323
	0.665632	0.0141643	-0.11811
	0.658586	0.0323625	-0.0485437
rcd1 sal1, MV 20 μM	0.652968	0.533578	0.377358
	0.649374	0.616359	0.540785
	0.640976	0.421348	0.249292
	0.63285	0.577206	0.467105
Oneway ANOVA
Col-0 and sal1 at 6 hours
	Sum of Squares	df	Mean Square	F	Sig.
Between Groups	0.293761	1	0.293761	28.9089	0.00170097
Within Groups	0.0609697	6	0.0101616
Total	0.354731	7
Oneway ANOVA
rcd1 and rcd1 sal1 at 15 hours
	Sum of Squares	df	Mean Square	F	Sig.
Between Groups	0.473851	1	0.473851	56.6991	0.000284286
Within Groups	0.0501438	6	0.00835729
Total	0.523995	7
