# Supplementary material for: Arabidopsis RCD1 coordinates chloroplast and mitochondrial functions through interaction with ANAC transcription factors
Source: eLife journal article supplement (doi:10.7554/elife.43284), 2019-02-15
Supplement: supp [file elife-43284-supp-v1.zip › elife_poa_e43284_Figure_7_figure_supplement_3.pdf]

**A**

205 LWGKGLNQSELDNDIEELMSQVRDQSGPTLQQNGVSGLNSHVDTYNLENLEEDMYLEINDLMEPEPEPTSVEVMENNWNEDGSGLLNDDDFVGA 299  
 205 LWGKGLNQSELDNDIEELMSQVRDQSGPTLQQNGVSGLNSHVDTYNLENLEED 258  
 235 LQQNGVSGLNSHVDTYNLENLEEDMYLEINDLMEPEPEPTSVEVMENNWN 284  
 251 NLENLEEDMYLEINDLMEPEPEPTSVEVMENNWNEDGSGLLNDDDFVGA 299

**B**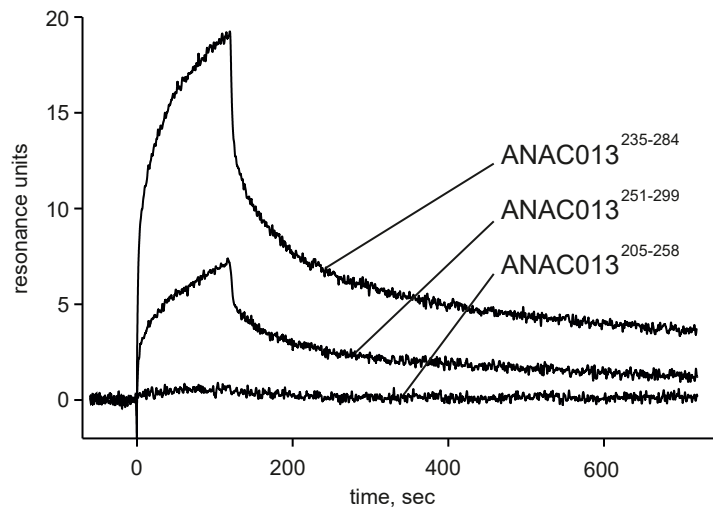**C**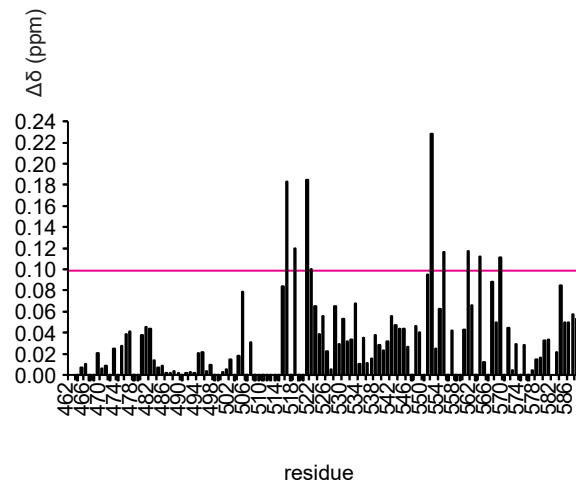

**Figure 7 – figure supplement 3. Analysis of interaction of the ANAC013-derived peptides with the RST domain of RCD1.**
