# Supplementary material for: Arabidopsis RCD1 coordinates chloroplast and mitochondrial functions through interaction with ANAC transcription factors
Source: eLife journal article supplement (doi:10.7554/elife.43284), 2019-02-15
Supplement: supp [file elife-43284-supp-v1.zip › elife_poa_e43284_Figure_7_source_data_1.xlsx]

## Sheet: Perseus analysis, ANAC013
Peptides	Unique peptides	Sequence coverage [%]	Unique sequence coverage [%]	Mol. weight [kDa]	Q-value	Score	Intensity	MS/MS Count	LFQ intensity WT_rep1	LFQ intensity WT_rep2	LFQ intensity WT_rep3	Average col-0	LFQ intensity ANAC13_rep1	LFQ intensity ANAC13_rep2	LFQ intensity ANAC13_rep3	Average ANAC13	RATIO ANAC13 vs Col-0	p-value	Protein IDs	Majority protein IDs	Fasta headers	Peptide IDs	id
31	29	52.3	49.4	59.321	0	323.31	1889000000	140	12	12	12	12	27.7762	27.0799	28.0556	27.6373	50966.4	7.09282e-07	AT1G32870.1;AT1G32870.2	AT1G32870.1;AT1G32870.2	Symbols: ANAC13, ANAC013, NAC13 | NAC domain protein 13 | chr1:11911745-11913692 FORWARD LENGTH=528;Symbols: ANAC13, NAC13 | NAC domain protein 13 | chr1:11911745-11913692 FORWARD LENGTH=522	234;256;297;312;313;497;498;500;514;526;527;689;999;1011;1209;1210;1362;1405;1483;1526;1534;1725;1726;1849;1850;1851;1940;1941;1942;1982;1983	71
25	25	87.9	87.9	36.921	0	323.31	1121700000	126	12	12	12	12	26.2322	26.4088	26.664	26.435	22149.3	3.40876e-08	CON__PSB_N_GS_green;CON__PSB_N_GS_yellow;CON__PSB_C_GS_green;CON__PSB_N_GFP;CON__PSB_C_GFP;CON__PSB_C_GS_yellow;CON__P42212;CON__Q9U6Y5;CON__PSB_C_SBP-HA;CON__PSB_C_SBP-Stag;CON__PSB_N_GS_TEV;CON__PSB_N_GS_rhino;CON__PSB_C_GS_TEV;CON__PSB_C_GS_rhino;CON__PSB_C_UBA-GS_rhino;CON__PSB_C_CSFH	CON__PSB_N_GS_green;CON__PSB_N_GS_yellow;CON__PSB_C_GS_green;CON__PSB_N_GFP;CON__PSB_C_GFP;CON__PSB_C_GS_yellow;CON__P42212;CON__Q9U6Y5	GFP	53;54;174;275;360;506;507;528;568;569;605;627;646;795;1087;1088;1089;1364;1365;1587;1756;1797;1798;2066;2183	460
37	37	66.4	66.4	65.696	0	323.31	383440000	118	12	12	12	12	24.6804	25.9683	25.2561	25.3016	10096.6	3.67113e-06	AT1G32230.1;AT1G32230.2;AT1G32230.3	AT1G32230.1;AT1G32230.2;AT1G32230.3	Symbols: RCD1, CEO, CEO1, ATP8, AtRCD1 | WWE protein-protein interaction domain protein family | chr1:11613427-11615894 FORWARD LENGTH=589;Symbols: RCD1, CEO, CEO1, ATP8, AtRCD1 | WWE protein-protein interaction domain protein family | chr1:11613427-1161	21;158;233;241;294;304;305;478;479;532;566;602;1001;1006;1055;1078;1193;1204;1230;1246;1247;1288;1442;1538;1578;1653;1661;1696;1728;1858;1908;1986;1996;2122;2139;2142;2200	70
39	16	59	23.4	71.147	0	228.38	127400000	96	12	12	12	12	23.3101	23.042	23.3174	23.2232	2390.59	2.54902e-08	AT3G09440.2;AT3G09440.1	AT3G09440.2;AT3G09440.1	Symbols: | Heat shock protein 70 (Hsp 70) family protein | chr3:2903434-2905632 REVERSE LENGTH=649;Symbols: | Heat shock protein 70 (Hsp 70) family protein | chr3:2903434-2905632 REVERSE LENGTH=649	168;169;189;238;249;303;399;428;451;503;573;574;603;865;866;929;1227;1278;1302;1336;1337;1338;1339;1348;1352;1373;1412;1413;1419;1423;1542;1631;1640;1811;1832;1890;1945;2056;2057	215
3	3	35.4	35.4	13.206	0	17.169	38256000	9	12	12	12	12	20.949	21.6201	22.0031	21.5241	736.256	6.52185e-06	AT1G30380.1	AT1G30380.1	Symbols: PSAK | photosystem I subunit K | chr1:10722325-10723013 FORWARD LENGTH=130	318;520;521	65
9	9	58.2	58.2	15.479	0	113.44	58608000	49	12	12	12	12	21.3774	21.5637	21.4136	21.4516	700.187	7.95777e-09	ATCG00770.1	ATCG00770.1	Symbols: RPS8 | ribosomal protein S8 | chrC:80068-80472 REVERSE LENGTH=134	329;374;375;445;664;800;848;857;877	434
20	20	25.3	25.3	103.45	0	131.66	32609000	53	12	12	12	12	20.7674	21.1014	21.3721	21.0803	541.302	8.23359e-07	AT5G50920.1;AT3G48870.2;AT3G48870.1;AT5G51070.1;AT2G25140.1	AT5G50920.1;AT3G48870.2;AT3G48870.1	Symbols: CLPC, ATHSP93-V, HSP93-V, DCA1, CLPC1 | CLPC homologue 1 | chr5:20715710-20719800 REVERSE LENGTH=929;Symbols: HSP93-III | Clp ATPase | chr3:18122363-18125915 REVERSE LENGTH=921;Symbols: ATCLPC, ATHSP93-III, HSP93-III | Clp ATPase | chr3:1812236	56;83;86;396;542;722;771;785;816;1031;1062;1103;1319;1403;1529;1685;1762;2013;2093;2114	393
47	16	67.7	29.6	71.357	0	323.31	268580000	114	17.1177	12	16.4645	15.1941	24.1975	24.1632	24.4095	24.2567	534.733	0.00489921	AT5G02500.1;AT5G02500.2	AT5G02500.1;AT5G02500.2	Symbols: HSC70-1, HSP70-1, AT-HSC70-1, HSC70 | heat shock cognate protein 70-1 | chr5:554055-556334 REVERSE LENGTH=651;Symbols: HSC70-1, HSP70-1, AT-HSC70-1, HSC70 | heat shock cognate protein 70-1 | chr5:554055-556334 REVERSE LENGTH=521	170;171;189;238;249;303;368;400;428;451;504;505;561;604;823;842;843;865;866;901;902;929;987;988;1227;1279;1302;1336;1337;1338;1339;1340;1341;1348;1352;1373;1414;1415;1541;1641;1737;1811;1833;1890;1945;2054;2055	330
8	8	41.1	41.1	31.727	0	67.669	19158000	25	12	12	12	12	20.1143	20.4531	20.667	20.4115	340.489	8.01705e-07	AT1G71500.1	AT1G71500.1	Symbols: | Rieske (2Fe-2S) domain-containing protein | chr1:26936084-26937331 FORWARD LENGTH=287	164;317;733;1253;1301;1355;1438;1691	116
4	4	26.2	26.2	24.173	0	32.263	23185000	23	12	12	12	12	20.4116	20.1195	20.5336	20.3549	327.393	2.80142e-07	AT1G31330.1	AT1G31330.1	Symbols: PSAF | photosystem I subunit F | chr1:11215011-11215939 REVERSE LENGTH=221	371;1269;1751;2162	67
9	9	57.7	57.7	22.017	0	92.223	29442000	42	12	12	12	12	20.2041	20.2567	20.5633	20.3414	324.339	1.94761e-07	AT1G33140.1;AT1G33120.1;AT4G10450.1	AT1G33140.1;AT1G33120.1	Symbols: PGY2 | Ribosomal protein L6 family | chr1:12023360-12024502 FORWARD LENGTH=194;Symbols: | Ribosomal protein L6 family | chr1:12010986-12012223 FORWARD LENGTH=194	534;585;790;820;1014;1592;1763;1978;1998	72
6	3	29.2	17.5	29.132	0	45.576	14634000	14	12	12	12	12	20.0479	20.2829	20.3944	20.2417	302.694	1.41152e-07	AT2G45960.2;AT2G45960.1;AT2G45960.3;AT4G00430.2	AT2G45960.2;AT2G45960.1;AT2G45960.3	Symbols: PIP1B, TMP-A, ATHH2, PIP1;2 | plasma membrane intrinsic protein 1B | chr2:18910450-18911579 FORWARD LENGTH=274;Symbols: PIP1B, TMP-A, ATHH2, PIP1;2 | plasma membrane intrinsic protein 1B | chr2:18910450-18911703 FORWARD LENGTH=286;Symbols: PIP1	225;1282;1500;1531;1665;1964	192
8	7	27.3	24.2	50.08	0	85.885	11605000	26	12	12	12	12	20.0864	19.8666	20.2364	20.0631	267.452	1.88675e-07	AT3G25860.1	AT3G25860.1	Symbols: LTA2, PLE2 | 2-oxoacid dehydrogenases acyltransferase family protein | chr3:9460632-9462585 FORWARD LENGTH=480	10;203;404;927;950;1387;1424;1974	240
15	15	17.8	17.8	112.12	0	114.32	12094000	27	12	12	12	12	20.0952	19.9245	20.1612	20.0603	266.925	3.51051e-08	AT1G06950.1	AT1G06950.1	Symbols: ATTIC110, TIC110 | translocon at the inner envelope membrane of chloroplasts 110 | chr1:2130303-2135563 REVERSE LENGTH=1016	68;250;263;346;438;1047;1200;1213;1232;1257;1535;1577;1636;1662;2008	15
24	5	68.9	17.8	50.733	0	323.31	17664000	24	12	12	12	12	19.5584	19.8017	20.2475	19.8692	233.806	2.58236e-06	AT5G62700.1;AT5G62690.1	AT5G62700.1;AT5G62690.1	Symbols: TUB3 | tubulin beta chain 3 | chr5:25184501-25186426 FORWARD LENGTH=450;Symbols: TUB2 | tubulin beta chain 2 | chr5:25181560-25183501 FORWARD LENGTH=450	214;349;408;472;552;587;644;645;893;908;994;1052;1112;1254;1313;1390;1422;1573;1634;1681;1736;2061;2178;2193	404
6	4	19.3	13.7	42.795	0	42.115	16180000	17	12	12	12	12	19.4035	19.8834	20.1442	19.8104	224.467	3.55209e-06	AT3G17390.1;AT4G01850.2;AT4G01850.1;AT1G02500.2;AT1G02500.1	AT3G17390.1;AT4G01850.2;AT4G01850.1;AT1G02500.2;AT1G02500.1	Symbols: MTO3, SAMS3, MAT4 | S-adenosylmethionine synthetase family protein | chr3:5952484-5953665 REVERSE LENGTH=393;Symbols: SAM-2, MAT2, SAM2, AtSAM2 | S-adenosylmethionine synthetase 2 | chr4:796298-797479 REVERSE LENGTH=393;Symbols: SAM-2, MAT2, SA	582;1619;1649;1799;1846;2029	233
2	2	13.9	13.9	29.742	0	50.777	9755900	14	12	12	12	12	19.6116	19.8455	19.6341	19.6971	207.516	5.26521e-08	AT4G35100.2;AT4G35100.1	AT4G35100.2;AT4G35100.1	Symbols: PIP3 | plasma membrane intrinsic protein 3 | chr4:16708672-16709958 FORWARD LENGTH=280;Symbols: PIP3, PIP3A, PIP2;7, SIMIP | plasma membrane intrinsic protein 3 | chr4:16708672-16709958 FORWARD LENGTH=280	122;1864	322
14	14	20.1	20.1	80.999	0	100.93	15680000	45	12	12	12	12	19.6901	19.5537	19.7535	19.6658	203.059	2.09716e-08	AT5G26742.1;AT5G26742.2;AT5G26742.3	AT5G26742.1;AT5G26742.2;AT5G26742.3	Symbols: emb1138 | DEAD box RNA helicase (RH3) | chr5:9285540-9288871 REVERSE LENGTH=747;Symbols: emb1138 | DEAD box RNA helicase (RH3) | chr5:9285540-9288871 REVERSE LENGTH=748;Symbols: emb1138 | DEAD box RNA helicase (RH3) | chr5:9285540-9288618 REVER	387;545;577;730;742;757;834;862;1071;1268;1674;1746;1803;1816	371
11	4	39.8	19.1	41.876	0	147.84	14577000	20	12	12	12	12	19.1757	19.762	20.03	19.6559	201.674	7.02036e-06	AT3G18780.2;AT1G49240.1;AT3G18780.1	AT3G18780.2;AT1G49240.1;AT3G18780.1	Symbols: ACT2, DER1, LSR2, ENL2 | actin 2 | chr3:6475535-6476832 FORWARD LENGTH=377;Symbols: ACT8 | actin 8 | chr1:18216539-18217947 FORWARD LENGTH=377;Symbols: ACT2, DER1, LSR2, ENL2 | actin 2 | chr3:6475535-6476728 FORWARD LENGTH=371	57;72;255;299;412;765;783;811;951;1440;1882	87
4	4	37.3	37.3	16.257	0	31.638	13598000	20	12	12	12	12	19.3518	19.5044	19.6791	19.5118	182.5	1.5042e-07	AT2G36160.1;AT3G52580.1;AT3G11510.1	AT2G36160.1;AT3G52580.1;AT3G11510.1	Symbols: | Ribosomal protein S11 family protein | chr2:15169925-15171159 FORWARD LENGTH=150;Symbols: | Ribosomal protein S11 family protein | chr3:19503324-19504701 FORWARD LENGTH=150;Symbols: | Ribosomal protein S11 family protein | chr3:3623757-362	41;824;1855;1938	170
6	6	43.1	43.1	16.544	0	37.049	13664000	18	12	12	12	12	19.0345	19.6063	19.7533	19.4647	176.644	4.43816e-06	AT5G18380.2;AT5G18380.1;AT5G18380.3;AT2G09990.1;AT3G04230.1	AT5G18380.2;AT5G18380.1;AT5G18380.3;AT2G09990.1;AT3G04230.1	Symbols: | Ribosomal protein S5 domain 2-like superfamily protein | chr5:6090128-6090693 REVERSE LENGTH=144;Symbols: | Ribosomal protein S5 domain 2-like superfamily protein | chr5:6090253-6090693 REVERSE LENGTH=146;Symbols: | Ribosomal protein S5 do	137;490;831;1172;1826;2032	356
27	3	78.7	15.1	36.913	0	323.31	9150800	9	12	12	12	12	19.6378	19.1557	19.5618	19.4517	175.064	9.73555e-07	AT1G13440.1;AT1G13440.2	AT1G13440.1;AT1G13440.2	Symbols: GAPC-2, GAPC2 | glyceraldehyde-3-phosphate dehydrogenase C2 | chr1:4608465-4610494 REVERSE LENGTH=338;Symbols: GAPC-2, GAPC2 | glyceraldehyde-3-phosphate dehydrogenase C2 | chr1:4608465-4610494 REVERSE LENGTH=310	20;23;24;74;75;252;259;265;519;652;851;1019;1020;1244;1245;1264;1401;1402;1595;1825;1989;2047;2096;2097;2110;2112;2150	33
26	2	79.3	11.2	36.914	0	14.864	9874200	11	12	12	12	12	20.2965	19.107	18.8968	19.4334	172.853	6.92782e-05	AT3G04120.1	AT3G04120.1	Symbols: GAPC, GAPC-1, GAPC1 | glyceraldehyde-3-phosphate dehydrogenase C subunit 1 | chr3:1081077-1083131 FORWARD LENGTH=338	20;23;24;74;75;96;252;265;519;652;851;1019;1020;1244;1245;1264;1400;1595;1825;1989;2047;2096;2097;2110;2112;2150	198
7	7	18.4	18.4	54.358	0	53.982	9067600	11	12	12	12	12	19.4248	19.05	19.8039	19.4263	172	4.39994e-06	AT3G46780.1	AT3G46780.1	Symbols: PTAC16 | plastid transcriptionally active 16 | chr3:17228766-17231021 FORWARD LENGTH=510	31;1215;1669;1702;1874;1921;2117	250
3	3	11.9	11.9	32.645	0	33.029	14068000	12	12	12	12	12	19.0923	19.5999	19.5833	19.4251	171.866	1.51144e-06	AT2G33800.1	AT2G33800.1	Symbols: | Ribosomal protein S5 family protein | chr2:14300925-14302352 REVERSE LENGTH=303	195;939;1489	166
16	16	28.2	28.2	93.89	0	143.75	31271000	62	12	16.4451	12	13.4817	20.7539	20.5666	20.9543	20.7583	155.049	0.00806157	AT1G56070.1;AT3G12915.1;AT3G12915.2	AT1G56070.1	Symbols: LOS1 | Ribosomal protein S5/Elongation factor G/III/V family protein | chr1:20968245-20971077 REVERSE LENGTH=843	227;295;352;384;522;570;620;626;889;1146;1267;1271;1351;1393;1731;2188	98
9	9	20.1	20.1	62.071	0	77.5	14949000	27	12	12	12	12	18.963	19.3345	19.3463	19.2146	148.528	5.54612e-07	AT2G28000.1	AT2G28000.1	Symbols: CPN60A, CH-CPN60A, SLP | chaperonin-60alpha | chr2:11926603-11929184 FORWARD LENGTH=586	15;87;748;761;1095;1436;1844;1962;2113	157
11	4	38.2	17.2	30.878	0	95.195	8912500	9	12	12	12	12	18.7459	19.5294	19.3494	19.2082	147.874	6.95329e-06	AT2G41840.1;AT3G57490.1	AT2G41840.1;AT3G57490.1	Symbols: | Ribosomal protein S5 family protein | chr2:17460016-17461398 REVERSE LENGTH=285;Symbols: | Ribosomal protein S5 family protein | chr3:21279824-21280887 REVERSE LENGTH=276	136;192;597;852;1016;1239;1256;1482;1697;1906;2025	185
8	8	20	20	52.113	0	54.941	6015100	14	12	12	12	12	19.1173	18.7846	19.563	19.155	142.516	5.88223e-06	AT5G67630.1;AT3G49830.1	AT5G67630.1	Symbols: | P-loop containing nucleoside triphosphate hydrolases superfamily protein | chr5:26967535-26969306 REVERSE LENGTH=469	11;97;218;239;680;1693;1866;2105	413
6	5	15.1	11.8	48.306	0	32.679	6081900	9	12	12	12	12	19.4565	18.246	19.5634	19.0886	136.11	7.39223e-05	AT1G34430.1	AT1G34430.1	Symbols: EMB3003 | 2-oxoacid dehydrogenases acyltransferase family protein | chr1:12588027-12590084 REVERSE LENGTH=465	190;205;404;934;1394;1409	74
4	4	12.2	12.2	46.097	0	25.143	7559400	19	12	12	12	12	19.031	19.0597	19.0864	19.059	133.345	1.57572e-10	AT5G45930.1;AT4G18480.1	AT5G45930.1;AT4G18480.1	Symbols: CHLI2, CHL I2, CHLI-2 | magnesium chelatase i2 | chr5:18628095-18629565 FORWARD LENGTH=418;Symbols: CHLI1, CH42, CH-42, CHL11, CHLI-1 | P-loop containing nucleoside triphosphate hydrolases superfamily protein | chr4:10201897-10203361 REVERSE LEN	61;530;850;1056	297
18	13	15.1	11.4	166.51	0	131.7	10971000	32	12	12	12	12	18.9244	19.1664	19.0607	19.0505	132.559	5.84481e-08	AT5G20490.2;AT5G20490.1;AT5G20470.1;AT1G54560.1;AT1G08730.1;AT3G58160.1;AT1G04160.1;AT5G43900.1;AT4G28710.1;AT2G31900.1;AT5G43900.2;AT5G43900.3;AT1G04600.1;AT2G33240.1	AT5G20490.2;AT5G20490.1	Symbols: XIK, ATXIK, XI-17 | Myosin family protein with Dil domain | chr5:6927064-6936079 REVERSE LENGTH=1465;Symbols: XIK, ATXIK, XI-17 | Myosin family protein with Dil domain | chr5:6927064-6936825 REVERSE LENGTH=1545	22;55;410;594;954;1003;1195;1197;1231;1240;1418;1466;1501;1533;1635;1801;1894;2030	360
9	9	27.9	27.9	40.911	0	79.183	30696000	40	12	12	17.2445	13.7482	20.8421	20.7653	20.7335	20.7803	130.881	0.0158398	AT4G04640.1	AT4G04640.1	Symbols: ATPC1 | ATPase, F1 complex, gamma subunit protein | chr4:2350761-2351882 REVERSE LENGTH=373	132;606;674;681;682;1323;1679;1916;2172	284
6	6	61.4	61.4	14.499	0	73.992	8393800	30	12	12	12	12	19.1326	18.9167	18.9318	18.9937	127.442	5.8771e-08	ATCG00470.1	ATCG00470.1	Symbols: ATPE | ATP synthase epsilon chain | chrC:52265-52663 REVERSE LENGTH=132	855;949;1041;1417;1513;1828	425
5	5	26.8	26.8	23.036	0	30.182	10145000	16	12	12	12	12	18.7687	18.9928	19.1799	18.9804	126.277	5.03831e-07	AT5G15200.1;AT5G15200.2;AT5G39850.1	AT5G15200.1;AT5G15200.2;AT5G39850.1	Symbols: | Ribosomal protein S4 | chr5:4935124-4936334 REVERSE LENGTH=198;Symbols: | Ribosomal protein S4 | chr5:4935602-4936334 REVERSE LENGTH=156;Symbols: | Ribosomal protein S4 | chr5:15950053-15951171 FORWARD LENGTH=197	292;784;829;1261;1493	353
2	2	6.2	6.2	38.936	0	24.045	5397500	8	12	12	12	12	18.9683	18.1113	19.3683	18.816	112.673	5.15202e-05	ATCG00020.1	ATCG00020.1	Symbols: PSBA | photosystem II reaction center protein A | chrC:383-1444 REVERSE LENGTH=353	147;1990	414
8	8	18.1	18.1	64.137	0	47.699	4043400	14	12	12	12	12	19.0941	18.5855	18.6817	18.7871	110.439	1.66912e-06	AT2G35510.1	AT2G35510.1	Symbols: SRO1 | similar to RCD one 1 | chr2:14916898-14919198 REVERSE LENGTH=568	477;776;985;1694;1831;1997;2140;2141	168
6	6	18.4	18.4	51.837	0	44.874	6473500	17	12	12	12	12	18.9009	18.6593	18.7739	18.778	109.748	6.72747e-08	AT1G74470.1	AT1G74470.1	Symbols: | Pyridine nucleotide-disulphide oxidoreductase family protein | chr1:27991248-27992845 FORWARD LENGTH=467	229;1053;1618;1925;1939;2006	119
5	5	11.1	11.1	44.559	0	29.612	5710500	7	12	12	12	12	18.3055	18.787	19.1687	18.7537	107.911	1.11185e-05	AT1G43170.9;AT1G43170.8;AT1G43170.7;AT1G43170.6;AT1G43170.5;AT1G43170.3;AT1G43170.2;AT1G43170.1;AT1G43170.4;AT1G61580.1	AT1G43170.9;AT1G43170.8;AT1G43170.7;AT1G43170.6;AT1G43170.5;AT1G43170.3;AT1G43170.2;AT1G43170.1;AT1G43170.4;AT1G61580.1	Symbols: RP1 | ribosomal protein 1 | chr1:16266992-16268631 FORWARD LENGTH=389;Symbols: RP1 | ribosomal protein 1 | chr1:16266992-16268631 FORWARD LENGTH=389;Symbols: RP1 | ribosomal protein 1 | chr1:16266992-16268631 FORWARD LENGTH=389;Symbols: RP1 |	571;760;779;1931;2001	79
2	2	14.4	14.4	13.406	0	11.84	5502900	4	12	12	12	12	18.394	18.6905	19.0741	18.7195	105.384	4.39587e-06	AT3G04400.2;AT3G04400.1;AT2G33370.1;AT1G04480.1	AT3G04400.2;AT3G04400.1;AT2G33370.1;AT1G04480.1	Symbols: emb2171 | Ribosomal protein L14p/L23e family protein | chr3:1167611-1168308 FORWARD LENGTH=125;Symbols: emb2171 | Ribosomal protein L14p/L23e family protein | chr3:1167339-1168308 FORWARD LENGTH=140;Symbols: | Ribosomal protein L14p/L23e famil	719;1386	10
20	6	58.1	24	42.489	0	274.74	33496000	31	12	18.2248	12	14.0749	20.9616	20.1684	21.2361	20.7887	104.966	0.0329687	AT3G26650.1	AT3G26650.1	Symbols: GAPA, GAPA-1 | glyceraldehyde 3-phosphate dehydrogenase A subunit | chr3:9795226-9796848 FORWARD LENGTH=396	1;206;320;601;651;665;736;869;964;1010;1138;1173;1404;1784;1911;1976;2045;2046;2094;2149	241
5	5	33.9	33.9	23.746	0	51.821	31003000	28	16.4477	16.1915	12	14.8797	21.5536	21.4538	21.7229	21.5768	103.753	0.00974775	AT1G61520.2;AT1G61520.3;AT1G61520.1	AT1G61520.2;AT1G61520.3;AT1G61520.1	Symbols: LHCA3 | photosystem I light harvesting complex gene 3 | chr1:22700493-22701149 FORWARD LENGTH=218;Symbols: LHCA3 | photosystem I light harvesting complex gene 3 | chr1:22700152-22701149 FORWARD LENGTH=273;Symbols: LHCA3 | photosystem I light ha	492;670;1186;1528;2129	103
12	4	18.4	6	76.996	0	93.894	3674900	8	12	12	12	12	18.4783	18.7053	18.7914	18.6583	101.009	2.31768e-07	AT5G49910.1	AT5G49910.1	Symbols: CPHSC70-2EAT SHOCK PROTEIN 70-2, HSC70-7, cpHsc70-2 | chloroplast heat shock protein 70-2 | chr5:20303470-20306295 FORWARD LENGTH=718	213;541;786;809;868;896;961;1061;1218;1472;1889;2103	391
3	3	16.6	16.6	19.682	0	17.621	5780900	4	12	12	12	12	18.7068	18.5645	18.6446	18.6386	99.6382	8.88748e-09	AT3G27850.1;AT3G27830.1	AT3G27850.1;AT3G27830.1	Symbols: RPL12-C | ribosomal protein L12-C | chr3:10324905-10325468 FORWARD LENGTH=187;Symbols: RPL12-A, RPL12 | ribosomal protein L12-A | chr3:10318576-10319151 FORWARD LENGTH=191	433;856;884	243
2	2	6.2	6.2	39.547	0	18.242	5037700	5	12	12	12	12	18.2769	18.392	19.225	18.6313	99.1317	2.43687e-05	ATCG00270.1	ATCG00270.1	Symbols: PSBD | photosystem II reaction center protein D | chrC:32711-33772 FORWARD LENGTH=353	5;1371	422
6	6	19.9	19.9	47.173	0	35.836	4426900	10	12	12	12	12	18.1351	18.7308	18.911	18.5923	96.4888	9.52008e-06	AT1G01090.1	AT1G01090.1	Symbols: PDH-E1 ALPHA | pyruvate dehydrogenase E1 alpha | chr1:47705-49166 REVERSE LENGTH=428	216;395;614;1181;1598;1701	0
20	3	57.2	8.2	50.342	0	74.581	6284200	13	12	12	12	12	18.5931	18.413	18.7328	18.5796	95.6461	2.34763e-07	AT1G20010.1	AT1G20010.1	Symbols: TUB5 | tubulin beta-5 chain | chr1:6938033-6940481 REVERSE LENGTH=449	349;409;552;586;642;643;894;908;994;1052;1112;1236;1313;1390;1422;1573;1633;2061;2177;2190	45
4	4	38.8	38.8	11.409	0	27.45	6495800	14	12	12	12	12	18.1262	19.0746	18.4549	18.5519	93.8234	1.9231e-05	AT5G59970.1;AT5G59690.1;AT3G53730.1;AT3G46320.1;AT3G45930.1;AT2G28740.1;AT1G07820.2;AT1G07820.1;AT1G07660.1;AT1G07660.2	AT5G59970.1;AT5G59690.1;AT3G53730.1;AT3G46320.1;AT3G45930.1;AT2G28740.1;AT1G07820.2;AT1G07820.1;AT1G07660.1;AT1G07660.2	Symbols: | Histone superfamily protein | chr5:24146352-24146663 REVERSE LENGTH=103;Symbols: | Histone superfamily protein | chr5:24051649-24051960 FORWARD LENGTH=103;Symbols: | Histone superfamily protein | chr3:19912659-19912970 REVERSE LENGTH=103;	254;302;833;915	17
5	5	35.4	35.4	14.804	0	37.665	20147000	26	12	17.1822	12	13.7274	19.9533	20.6023	20.2706	20.2754	93.5718	0.0196293	AT5G59850.1;AT1G07770.2;AT1G07770.1;AT3G46040.1;AT2G39590.1	AT5G59850.1;AT1G07770.2;AT1G07770.1;AT3G46040.1	Symbols: | Ribosomal protein S8 family protein | chr5:24112499-24113084 REVERSE LENGTH=130;Symbols: RPS15A | ribosomal protein S15A | chr1:2408413-2409065 REVERSE LENGTH=130;Symbols: RPS15A | ribosomal protein S15A | chr1:2408413-2409065 REVERSE LENGTH	402;538;782;925;947	18
5	5	14.2	14.2	50.323	0	32.663	3553600	10	12	12	12	12	18.6617	18.2942	18.6213	18.5258	92.1406	6.05055e-07	AT5G22330.1	AT5G22330.1	Symbols: ATTIP49A, RIN1 | P-loop containing nucleoside triphosphate hydrolases superfamily protein | chr5:7391026-7394071 REVERSE LENGTH=458	117;127;345;1644;1868	361
3	3	17.4	17.4	19.775	0	20.529	5603800	12	12	12	12	12	17.823	18.583	18.9449	18.4503	87.4443	4.06942e-05	AT5G45775.1;AT5G45775.2;AT4G18730.1;AT3G58700.1;AT2G42740.1	AT5G45775.1;AT5G45775.2;AT4G18730.1;AT3G58700.1;AT2G42740.1	Symbols: | Ribosomal L5P family protein | chr5:18565281-18566377 REVERSE LENGTH=172;Symbols: | Ribosomal L5P family protein | chr5:18565281-18566496 REVERSE LENGTH=182;Symbols: RPL16B | ribosomal protein L16B | chr4:10302238-10303206 FORWARD LENGTH=18	806;2014;2155	187
30	6	45.3	12.7	71.386	0	68.528	4868500	15	12	12	12	12	18.3566	18.4184	18.4641	18.413	85.2135	3.33547e-09	AT5G02490.1;AT1G56410.1	AT5G02490.1;AT1G56410.1	Symbols: | Heat shock protein 70 (Hsp 70) family protein | chr5:550296-552565 REVERSE LENGTH=653;Symbols: ERD2, HSP70T-1 | heat shock protein 70 (Hsp 70) family protein | chr1:21117147-21119241 FORWARD LENGTH=617	189;238;248;303;398;429;450;559;842;843;865;866;929;1336;1337;1338;1339;1348;1352;1373;1414;1415;1423;1473;1640;1811;1890;1945;2054;2055	329
2	2	10.9	10.9	27.522	0	12.66	3644600	7	12	12	12	12	18.3685	18.3487	18.3854	18.3675	82.5696	4.6385e-11	AT1G15820.1	AT1G15820.1	Symbols: LHCB6, CP24 | light harvesting complex photosystem II subunit 6 | chr1:5446685-5447676 REVERSE LENGTH=258	510;1758	40
7	7	14.3	14.3	66.758	0	43.118	8160100	15	12	12	12	12	18.2836	18.1908	18.4976	18.324	80.1156	2.55208e-07	AT2G39800.2;AT2G39800.3;AT2G39800.4;AT2G39800.1;AT3G55610.1;AT3G55610.2	AT2G39800.2;AT2G39800.3;AT2G39800.4;AT2G39800.1;AT3G55610.1;AT3G55610.2	Symbols: P5CS1, ATP5CS | delta1-pyrroline-5-carboxylate synthase 1 | chr2:16598516-16601976 REVERSE LENGTH=614;Symbols: P5CS1 | delta1-pyrroline-5-carboxylate synthase 1 | chr2:16598516-16602939 REVERSE LENGTH=714;Symbols: P5CS1 | delta1-pyrroline-5-car	27;363;709;923;1118;1630;1995	182
13	13	53.7	53.7	25.188	0	128.57	58048000	68	12	16.0969	16.8913	14.9961	22.131	20.7176	21.0508	21.2998	78.9961	0.0160777	ATCG00800.1	ATCG00800.1	Symbols: | structural constituent of ribosome | chrC:82826-83482 REVERSE LENGTH=218	88;386;656;822;919;921;1026;1153;1174;1567;1808;2042;2189	435
4	4	11	11	54.971	0	23.896	5141800	8	12	12	12	12	17.9887	18.2233	18.5437	18.2519	76.21	2.61744e-06	ATMG01190.1;AT2G07698.1	ATMG01190.1;AT2G07698.1	Symbols: ATP1 | ATP synthase subunit 1 | chrM:302166-303689 REVERSE LENGTH=507;Symbols: | ATPase, F1 complex, alpha subunit protein | chr2:3361474-3364028 FORWARD LENGTH=777	209;467;1884;2092	137
2	2	17.9	17.9	15.143	0	16.177	3732100	23	12	12	12	12	18.2775	18.3131	18.1169	18.2358	75.3653	5.25857e-08	AT1G08380.1	AT1G08380.1	Symbols: PSAO | photosystem I subunit O | chr1:2641004-2641739 REVERSE LENGTH=140	293;1537	22
5	4	8.6	7.4	62.586	0	31.388	2652700	6	12	12	12	12	18.1851	18.2632	18.2137	18.2207	74.5768	1.08591e-09	AT1G34190.1	AT1G34190.1	Symbols: ANAC017, NAC017 | NAC domain containing protein 17 | chr1:12451729-12453914 FORWARD LENGTH=557	42;236;558;1527;2036	73
18	4	49	7.8	46.704	0	217.81	5370600	8	12	12	12	12	17.9252	18.1994	18.488	18.2042	73.7308	2.8091e-06	AT3G13920.1;AT3G13920.3;AT3G13920.4;AT3G13920.2;AT1G72730.1	AT3G13920.1;AT3G13920.3;AT3G13920.4;AT3G13920.2;AT1G72730.1	Symbols: EIF4A1, RH4, TIF4A1 | eukaryotic translation initiation factor 4A1 | chr3:4592635-4594128 REVERSE LENGTH=412;Symbols: EIF4A1, RH4, TIF4A1 | eukaryotic translation initiation factor 4A1 | chr3:4592635-4594094 REVERSE LENGTH=402;Symbols: EIF4A1 |	78;119;276;422;591;661;675;738;880;981;1012;1085;1292;1307;1536;1711;1975;2018	229
27	5	37.5	9.1	71.101	0	42.062	7278800	11	12	12	12	12	18.2984	17.8655	18.3237	18.1625	71.6327	2.02614e-06	AT3G12580.1;AT1G16030.1	AT3G12580.1	Symbols: HSP70, ATHSP70 | heat shock protein 70 | chr3:3991487-3993689 REVERSE LENGTH=650	170;171;189;238;303;397;504;505;817;865;866;929;1228;1336;1337;1338;1348;1352;1373;1476;1640;1723;1811;1890;1945;2054;2055	223
6	6	13.4	13.4	60.146	0	37.703	2648900	7	12	12	12	12	17.2206	18.7853	18.4401	18.1487	70.9472	0.000204777	AT3G04210.1;AT3G44480.1;AT2G14080.1;AT3G44670.2;AT3G44670.1;AT3G25510.1	AT3G04210.1	Symbols: | Disease resistance protein (TIR-NBS class) | chr3:1106243-1108005 REVERSE LENGTH=531	864;1021;1113;1298;1310;1912	199
5	5	11.8	11.8	45.11	0	30.936	4649500	9	12	12	12	12	18.0233	17.9113	18.0951	18.0099	64.4406	3.76265e-08	AT5G30510.1	AT5G30510.1	Symbols: RPS1, ARRPS1 | ribosomal protein S1 | chr5:11619262-11621223 REVERSE LENGTH=416	0;580;631;813;1491	375
12	4	42.9	15.8	49.537	0	133.66	5159100	14	12	12	12	12	18.519	17.7582	17.7492	18.0088	64.3918	1.92612e-05	AT4G14960.2;AT1G50010.1;AT1G04820.1;AT4G14960.1;AT1G64740.1	AT4G14960.2;AT1G50010.1;AT1G04820.1;AT4G14960.1	Symbols: TUA6 | Tubulin/FtsZ family protein | chr4:8548769-8550319 REVERSE LENGTH=450;Symbols: TUA2 | tubulin alpha-2 chain | chr1:18517737-18519729 FORWARD LENGTH=450;Symbols: TUA4, TOR2 | tubulin alpha-4 chain | chr1:1356421-1358266 REVERSE LENGTH=450	62;211;235;338;361;414;992;1238;1263;1488;1805;1897	11
2	2	5.2	5.2	37.674	0	11.672	3902500	5	12	12	12	12	17.4603	18.1113	18.2893	17.9536	61.9754	1.90224e-05	AT3G44110.2;AT5G22060.1;AT3G44110.1	AT3G44110.2;AT5G22060.1;AT3G44110.1	Symbols: ATJ3, ATJ | DNAJ homologue 3 | chr3:15869179-15871059 REVERSE LENGTH=343;Symbols: ATJ2, J2 | DNAJ homologue 2 | chr5:7303798-7305668 REVERSE LENGTH=419;Symbols: ATJ3, ATJ | DNAJ homologue 3 | chr3:15869115-15871059 REVERSE LENGTH=420	1543;2015	246
24	24	41.6	41.6	84.356	0	288.67	66355000	93	17.0201	16.5901	15.312	16.3074	22.185	21.9191	22.549	22.2177	60.1433	0.000408711	AT5G17920.2;AT5G17920.1;AT3G03780.3;AT3G03780.2;AT3G03780.1;AT5G20980.2;AT5G20980.1	AT5G17920.2;AT5G17920.1;AT3G03780.3;AT3G03780.2;AT3G03780.1	Symbols: ATCIMS | Cobalamin-independent synthase family protein | chr5:5935771-5939195 FORWARD LENGTH=765;Symbols: ATCIMS, ATMETS, ATMS1 | Cobalamin-independent synthase family protein | chr5:5935771-5939195 FORWARD LENGTH=765;Symbols: ATMS2, MS2 | meth	9;94;95;107;121;179;242;491;628;694;697;755;774;998;1017;1027;1176;1304;1608;1749;2106;2123;2158;2173	355
3	3	13.3	13.3	31.981	0	21.642	5333300	10	12	12	12	12	17.8714	18.0248	17.7174	17.8712	58.534	3.1267e-07	AT1G72370.2;AT1G72370.1;AT3G04770.2;AT3G04770.1	AT1G72370.2;AT1G72370.1;AT3G04770.2;AT3G04770.1	Symbols: P40, AP40, RP40, RPSAA | 40s ribosomal protein SA | chr1:27243148-27244842 REVERSE LENGTH=294;Symbols: P40, AP40, RP40, RPSAA | 40s ribosomal protein SA | chr1:27243148-27244842 REVERSE LENGTH=298;Symbols: RPSAb | 40s ribosomal protein SA B | c	493;803;1155	118
22	3	59.7	11.4	50.747	0	62.679	4457700	7	12	12	12	12	17.4671	17.8586	18.2837	17.8698	58.4765	1.54608e-05	AT2G29550.1	AT2G29550.1	Symbols: TUB7 | tubulin beta-7 chain | chr2:12644258-12645932 REVERSE LENGTH=449	215;349;409;472;552;644;645;908;994;1052;1112;1235;1314;1385;1390;1422;1573;1736;2037;2061;2178;2195	162
5	3	24.1	18.8	22.196	0	30.225	2416900	6	12	12	12	12	17.3806	18.0963	17.905	17.794	55.4829	1.10522e-05	AT3G02560.2;AT3G02560.1	AT3G02560.2;AT3G02560.1	Symbols: | Ribosomal protein S7e family protein | chr3:542341-543168 FORWARD LENGTH=191;Symbols: | Ribosomal protein S7e family protein | chr3:542341-543168 FORWARD LENGTH=191	222;284;334;739;960	195
2	2	10.7	10.7	20.967	0	12.026	3054900	5	12	12	12	12	16.8683	18.2882	18.1963	17.7843	55.1108	0.000227713	AT5G27850.1;AT3G05590.1	AT5G27850.1;AT3G05590.1	Symbols: | Ribosomal protein L18e/L15 superfamily protein | chr5:9873169-9874297 FORWARD LENGTH=187;Symbols: RPL18 | ribosomal protein L18 | chr3:1621511-1622775 FORWARD LENGTH=187	153;647	203
10	2	35	5.6	41.735	0	23.79	3508000	6	12	12	12	12	17.5484	17.4957	18.3041	17.7827	55.0526	2.46144e-05	AT5G09810.1;AT3G53750.1;AT2G37620.2;AT2G37620.1;AT2G42100.1	AT5G09810.1;AT3G53750.1;AT2G37620.2;AT2G37620.1	Symbols: ACT7 | actin 7 | chr5:3052809-3054220 FORWARD LENGTH=377;Symbols: ACT3 | actin 3 | chr3:19915924-19917371 FORWARD LENGTH=377;Symbols: ACT1, AAc1 | actin 1 | chr2:15779761-15781241 FORWARD LENGTH=377;Symbols: ACT1, AAc1 | actin 1 | chr2:1577976	72;255;298;412;765;802;951;1440;1607;1883	340
2	2	9.5	9.5	24.917	0	24.49	3477000	7	12	12	12	12	17.6621	17.7279	17.9321	17.774	54.722	2.35177e-07	AT1G14320.1;AT1G66580.1;AT1G26910.1	AT1G14320.1;AT1G66580.1;AT1G26910.1	Symbols: SAC52, RPL10, RPL10A | Ribosomal protein L16p/L10e family protein | chr1:4888270-4889408 FORWARD LENGTH=220;Symbols: SAG24, RPL10C | senescence associated gene 24 | chr1:24839208-24840439 FORWARD LENGTH=221;Symbols: RPL10B | Ribosomal protein L	1583;1910	35
7	7	8.5	8.5	106.08	0	49.38	3850300	15	12	12	12	12	17.3332	17.9582	17.6779	17.6564	50.4367	6.21264e-06	AT4G31490.1;AT4G31480.2;AT4G31480.1	AT4G31490.1;AT4G31480.2;AT4G31480.1	Symbols: | Coatomer, beta subunit | chr4:15269460-15272693 FORWARD LENGTH=948;Symbols: | Coatomer, beta subunit | chr4:15264145-15267384 FORWARD LENGTH=948;Symbols: | Coatomer, beta subunit | chr4:15264145-15267384 FORWARD LENGTH=948	135;193;351;1140;1345;1927;2026	316
8	5	22.6	14.4	56.931	0	84.174	3970800	10	12	12	12	12	17.6806	17.5363	17.542	17.5863	48.0446	3.04792e-08	AT4G35090.1;AT4G35090.2;AT1G20630.1	AT4G35090.1;AT4G35090.2	Symbols: CAT2 | catalase 2 | chr4:16700937-16703215 REVERSE LENGTH=492;Symbols: CAT2 | catalase 2 | chr4:16701105-16703215 REVERSE LENGTH=474	382;611;703;1091;1110;1177;1671;2126	321
3	3	10.7	10.7	42.405	0	19.882	2504700	6	12	12	12	12	17.2553	17.9751	17.3427	17.5244	46.026	1.6839e-05	AT3G47520.1	AT3G47520.1	Symbols: MDH | malate dehydrogenase | chr3:17513657-17514868 FORWARD LENGTH=403	260;905;1926	252
4	4	20.8	20.8	28.007	0	31.135	7016600	15	12	16.8611	12	13.6204	19.1203	18.8972	19.4155	19.1443	46.0134	0.0274143	AT1G44575.1;AT1G44575.2	AT1G44575.1;AT1G44575.2	Symbols: NPQ4, PSBS | Chlorophyll A-B binding family protein | chr1:16871768-16873194 FORWARD LENGTH=265;Symbols: NPQ4, PSBS | Chlorophyll A-B binding family protein | chr1:16871768-16872548 FORWARD LENGTH=205	145;446;578;1918	81
2	2	6.7	6.7	44.015	0	12.636	2268700	6	12	12	12	12	17.4648	16.6493	18.3121	17.4754	44.4907	0.000336999	AT2G34590.1;AT1G30120.1	AT2G34590.1;AT1G30120.1	Symbols: | Transketolase family protein | chr2:14568956-14570844 REVERSE LENGTH=406;Symbols: PDH-E1 BETA | pyruvate dehydrogenase E1 beta | chr1:10584350-10586477 REVERSE LENGTH=406	759;1604	64
3	3	5.2	5.2	80.063	0	18.526	3329300	5	12	12	12	12	17.5549	17.3055	17.4228	17.4277	43.0435	1.8575e-07	AT5G56030.1;AT5G56010.1;AT5G56000.1;AT5G56030.2;AT5G52640.1	AT5G56030.1;AT5G56010.1;AT5G56000.1;AT5G56030.2	Symbols: HSP81-2, ERD8, HSP90.2, AtHsp90.2 | heat shock protein 81-2 | chr5:22686923-22689433 FORWARD LENGTH=699;Symbols: HSP81-3, Hsp81.3, AtHsp90-3, AtHsp90.3 | heat shock protein 81-3 | chr5:22681410-22683911 FORWARD LENGTH=699;Symbols: Hsp81.4, AtHs	660;1104;1985	396
3	3	21.4	21.4	22.533	0	25.088	7331500	15	12	12	16.2799	13.4266	19.1393	18.3581	19.017	18.8381	42.5617	0.0201296	AT4G03280.2;AT4G03280.1	AT4G03280.2;AT4G03280.1	Symbols: PETC, PGR1 | photosynthetic electron transfer C | chr4:1440462-1441717 FORWARD LENGTH=210;Symbols: PETC, PGR1 | photosynthetic electron transfer C | chr4:1440314-1441717 FORWARD LENGTH=229	251;702;2016	283
2	2	11.6	11.6	20.607	0	15.619	2646800	11	12	12	12	12	17.5837	17.0958	17.4617	17.3804	41.6548	3.29113e-06	AT3G62290.3;AT3G62290.2;AT3G62290.1;AT2G47170.1;AT1G70490.3;AT1G70490.2;AT1G70490.1;AT1G23490.1;AT1G10630.1;AT5G14670.1	AT3G62290.3;AT3G62290.2;AT3G62290.1;AT2G47170.1;AT1G70490.3;AT1G70490.2;AT1G70490.1;AT1G23490.1;AT1G10630.1;AT5G14670.1	Symbols: ARFA1E | ADP-ribosylation factor A1E | chr3:23052287-23053545 FORWARD LENGTH=181;Symbols: ARFA1E | ADP-ribosylation factor A1E | chr3:23052287-23053545 FORWARD LENGTH=181;Symbols: ATARFA1E, ARFA1E | ADP-ribosylation factor A1E | chr3:23052287-2	253;879	27
12	12	31.8	31.8	49.502	0	99.22	108070000	66	17.5039	16.9837	17.468	17.3185	22.3171	22.7123	23.0248	22.6847	41.2461	3.49536e-05	AT5G60390.3;AT5G60390.1;AT1G07940.2;AT1G07940.1;AT1G07930.1;AT1G07920.1;AT1G07930.2;AT5G60390.2	AT5G60390.3;AT5G60390.1;AT1G07940.2;AT1G07940.1;AT1G07930.1;AT1G07920.1;AT1G07930.2;AT5G60390.2	Symbols: | GTP binding Elongation factor Tu family protein | chr5:24289226-24290675 FORWARD LENGTH=449;Symbols: | GTP binding Elongation factor Tu family protein | chr5:24289226-24290675 FORWARD LENGTH=449;Symbols: | GTP binding Elongation factor Tu	176;389;849;1183;1331;1514;1547;1733;1735;1950;2146;2198	20
5	5	13.1	13.1	55.609	0	30.799	3381000	9	12	12	12	12	17.1582	17.1463	17.5197	17.2747	38.7122	1.74093e-06	ATCG00500.1	ATCG00500.1	Symbols: ACCD | acetyl-CoA carboxylase carboxyl transferase subunit beta | chrC:57075-58541 FORWARD LENGTH=488	547;749;830;1359;1748	428
2	2	16.3	16.3	21.071	0	26.602	11039000	6	12	12	19.2946	14.4315	19.3319	20.3042	19.473	19.703	38.6256	0.0978407	AT5G62200.1	AT5G62200.1	Symbols: | Embryo-specific protein 3, (ATS3) | chr5:24984463-24985674 REVERSE LENGTH=190	309;1632	402
7	7	31.1	31.1	30.156	0	53.446	7513700	28	12	17.0886	12	13.6962	19.0912	18.6953	18.9737	18.9201	37.3724	0.0372044	AT4G10340.1	AT4G10340.1	Symbols: LHCB5 | light harvesting complex of photosystem II 5 | chr4:6408200-6409496 FORWARD LENGTH=280	219;306;791;792;835;1787;2119	286
6	6	20.1	20.1	38.137	0	49.689	5247400	11	12	12	12	12	16.933	17.3304	17.248	17.1705	36.0138	1.80024e-06	ATCG00740.1	ATCG00740.1	Symbols: RPOA | RNA polymerase subunit alpha | chrC:77901-78890 REVERSE LENGTH=329	126;712;825;876;1326;1350	431
3	3	10.3	10.3	58.906	0	24.89	1574800	5	12	12	12	12	17.7787	16.1947	17.0559	17.0098	32.2176	0.000396255	AT4G16143.2;AT4G16143.1;AT3G06720.2;AT3G06720.1	AT4G16143.2;AT4G16143.1	Symbols: IMPA-2 | importin alpha isoform 2 | chr4:9134450-9137134 REVERSE LENGTH=535;Symbols: IMPA-2 | importin alpha isoform 2 | chr4:9134450-9137134 REVERSE LENGTH=535	870;1258;2109	291
2	2	5.8	5.8	42.619	0	55.885	2818400	10	12	12	12	12	16.9917	17.0543	16.6354	16.8938	29.7289	3.01653e-06	AT1G09340.1	AT1G09340.1	Symbols: CRB, CSP41B, HIP1.3 | chloroplast RNA binding | chr1:3015473-3018035 FORWARD LENGTH=378	289;529	23
3	3	8.5	8.5	56.036	0	16.917	1463900	3	12	12	12	12	17.1242	16.482	16.934	16.8468	28.7752	1.41586e-05	ATCG00680.1	ATCG00680.1	Symbols: PSBB | photosystem II reaction center protein B | chrC:72371-73897 FORWARD LENGTH=508	79;162;1480	430
3	3	8.5	8.5	48.031	0	19.574	4401500	5	12	12	12	12	18.7412	12	19.5399	16.7604	27.1025	0.117359	AT4G39960.1;AT2G22360.1	AT4G39960.1	Symbols: | Molecular chaperone Hsp40/DnaJ family protein | chr4:18534194-18536320 FORWARD LENGTH=447	637;1309;2058	327
2	2	1.6	1.6	80.819	0	11.958	1280700	6	12	12	12	12	16.9466	16.0375	17.0774	16.6872	25.7625	0.000137658	AT1G15690.1	AT1G15690.1	Symbols: AVP1, ATAVP3, AVP-3, AtVHP1;1 | Inorganic H pyrophosphatase family protein | chr1:5399115-5402185 FORWARD LENGTH=770	1025;2166	38
3	3	23.9	23.9	21.057	0	19.511	6909400	5	12	12	12	12	18.964	18.9591	12	16.6411	24.9514	0.116117	ATCG00130.1	ATCG00130.1	Symbols: ATPF | ATPase, F0 complex, subunit B/B, bacterial/chloroplast | chrC:11529-12798 REVERSE LENGTH=184	373;1175;1958	417
4	4	33.3	33.3	15.023	0	81.986	7685900	14	12	12	12	12	18.9018	18.9703	12	16.624	24.6585	0.116126	ATCG00750.1	ATCG00750.1	Symbols: RPS11 | ribosomal protein S11 | chrC:78960-79376 REVERSE LENGTH=138	221;737;1627;1994	432
10	10	37.3	37.3	26.904	0	76.299	33971000	41	12	17.3523	18.6791	16.0105	20.2619	21.3675	20.1904	20.6066	24.1866	0.0913049	ATCG00160.1	ATCG00160.1	Symbols: RPS2 | ribosomal protein S2 | chrC:15013-15723 REVERSE LENGTH=236	80;544;649;978;1086;1259;1779;2130;2131;2197	418
18	4	52.9	14.3	37.667	0	38.561	16085000	19	12	16.5428	17.6596	15.4008	20.0772	19.9401	19.9362	19.9845	23.9782	0.0571315	AT1G12900.4;AT1G12900.3;AT1G12900.1;AT1G12900.2	AT1G12900.4;AT1G12900.3;AT1G12900.1;AT1G12900.2	Symbols: GAPA-2 | glyceraldehyde 3-phosphate dehydrogenase A subunit 2 | chr1:4392634-4393850 REVERSE LENGTH=350;Symbols: GAPA-2 | glyceraldehyde 3-phosphate dehydrogenase A subunit 2 | chr1:4392634-4393850 REVERSE LENGTH=350;Symbols: GAPA-2 | glycerald	1;206;321;651;665;736;965;1010;1138;1173;1784;1911;1976;2017;2045;2046;2094;2148	31
2	2	8.4	8.4	21.307	0	11.203	1187600	3	12	12	12	12	16.3466	16.3602	16.7808	16.4959	22.563	6.02105e-06	AT2G34480.1;AT1G29965.1;AT1G29970.2;AT3G14600.1	AT2G34480.1;AT1G29965.1;AT1G29970.2;AT3G14600.1	Symbols: | Ribosomal protein L18ae/LX family protein | chr2:14532916-14534161 REVERSE LENGTH=178;Symbols: | Ribosomal protein L18ae/LX family protein | chr1:10498458-10499373 REVERSE LENGTH=178;Symbols: RPL18AA | 60S ribosomal protein L18A-1 | chr1:10	551;1358	63
18	18	42.2	42.2	55.328	0	323.31	230780000	119	19.0155	19.2924	19.0506	19.1195	23.6156	23.5076	23.5998	23.5743	21.9296	1.15222e-06	ATCG00120.1	ATCG00120.1	Symbols: ATPA | ATP synthase subunit alpha | chrC:9938-11461 REVERSE LENGTH=507	34;187;357;379;447;452;480;540;815;972;1116;1133;1562;1747;1834;1835;1845;1988	416
4	4	4.3	4.3	136.47	0	24.167	1692500	10	12	12	12	12	16.5254	16.2298	16.5392	16.4315	21.5778	1.60765e-06	AT2G21390.1;AT1G62020.1	AT2G21390.1;AT1G62020.1	Symbols: | Coatomer, alpha subunit | chr2:9152428-9156577 FORWARD LENGTH=1218;Symbols: | Coatomer, alpha subunit | chr1:22919814-22923728 FORWARD LENGTH=1216	705;1219;1262;1557	149
2	2	4.1	4.1	68.878	0	11.215	750600	2	12	12	12	12	16.2365	16.7918	16.2608	16.4297	21.5515	1.66093e-05	AT4G27500.1	AT4G27500.1	Symbols: PPI1 | proton pump interactor 1 | chr4:13743614-13745900 FORWARD LENGTH=612	200;1602	309
21	15	50.6	38.7	47.659	0	195.54	95399000	70	19.1043	18.3864	16.6938	18.0615	22.3264	22.3927	22.3943	22.3711	19.8302	0.00381591	AT1G42970.1	AT1G42970.1	Symbols: GAPB | glyceraldehyde-3-phosphate dehydrogenase B subunit | chr1:16127552-16129584 FORWARD LENGTH=447	1;220;322;592;665;690;691;736;935;966;1138;1173;1847;1911;1984;2002;2043;2044;2091;2095;2147	78
3	3	15.2	15.2	31.05	0	53.148	3259200	7	12	12	12	12	12	17.7377	18.9809	16.2396	18.89	0.119903	AT2G39010.1	AT2G39010.1	Symbols: PIP2E, PIP2;6 | plasma membrane intrinsic protein 2E | chr2:16291564-16293746 FORWARD LENGTH=289	1610;1810;1959	180
16	3	25.5	6	104.22	0	105.82	2656400	3	12	12	12	12	18.3393	18.2992	12	16.2128	18.5432	0.116121	AT2G18960.1	AT2G18960.1	Symbols: AHA1, PMA, OST2, HA1 | H(+)-ATPase 1 | chr2:8221858-8227268 FORWARD LENGTH=949	12;129;476;598;744;798;953;984;1097;1141;1203;1237;1300;1628;1765;1948	142
2	2	23.8	23.8	17.058	0	14.149	844960	10	12	12	12	12	15.6575	16.3315	16.5347	16.1746	18.058	9.50307e-05	AT1G04270.2;AT5G09510.1;AT1G04270.1;AT5G09510.2;AT5G43640.1;AT5G09500.1	AT1G04270.2;AT5G09510.1;AT1G04270.1;AT5G09510.2;AT5G43640.1;AT5G09500.1	Symbols: RPS15 | cytosolic ribosomal protein S15 | chr1:1141852-1142960 REVERSE LENGTH=151;Symbols: | Ribosomal protein S19 family protein | chr5:2955698-2956554 REVERSE LENGTH=152;Symbols: RPS15 | cytosolic ribosomal protein S15 | chr1:1141852-1142960	741;1388	8
2	2	13.9	13.9	29.092	0	12.998	3493600	5	12	12	12	12	18.0867	18.3149	12	16.1339	17.5559	0.116251	AT3G11630.1;AT5G06290.1	AT3G11630.1;AT5G06290.1	Symbols: | Thioredoxin superfamily protein | chr3:3672189-3673937 FORWARD LENGTH=266;Symbols: 2-Cys Prx B, 2CPB | 2-cysteine peroxiredoxin B | chr5:1919380-1921211 FORWARD LENGTH=273	678;1611	219
12	4	21.3	8.9	76.507	0	24.492	2560900	4	12	12	12	12	18.3591	18.0106	12	16.1232	17.427	0.116432	AT4G24280.1	AT4G24280.1	Symbols: cpHsc70-1 | chloroplast heat shock protein 70-1 | chr4:12590094-12593437 FORWARD LENGTH=718	102;213;541;786;809;867;897;961;1005;1218;1472;1889	303
3	3	4.8	4.8	87.316	0	18.795	915840	4	12	12	12	12	15.8457	15.438	16.9273	16.0703	16.7993	0.000788515	AT1G79930.2;AT1G79930.1;AT1G79920.2;AT1G79920.1	AT1G79930.2;AT1G79930.1;AT1G79920.2;AT1G79920.1	Symbols: HSP91 | heat shock protein 91 | chr1:30063924-30067067 REVERSE LENGTH=789;Symbols: HSP91 | heat shock protein 91 | chr1:30063781-30067067 REVERSE LENGTH=831;Symbols: | Heat shock protein 70 (Hsp 70) family protein | chr1:30058935-30062224 REVE	66;1539;1966	128
3	3	8.4	8.4	79.838	0	30.966	3457800	5	12	12	12	12	17.8349	18.3071	12	16.0473	16.5336	0.116718	AT3G60750.2;AT3G60750.1;AT2G45290.1	AT3G60750.2;AT3G60750.1	Symbols: | Transketolase | chr3:22454004-22456824 FORWARD LENGTH=740;Symbols: | Transketolase | chr3:22454004-22456824 FORWARD LENGTH=741	131;1384;1854	267
3	3	21.7	21.7	22.921	0	36.082	1887500	8	12	12	14.8846	12.9615	16.6492	17.6028	16.7016	16.9845	16.2571	0.0163633	AT3G11940.2;AT3G11940.1;AT2G37270.2;AT2G37270.1	AT3G11940.2;AT3G11940.1;AT2G37270.2;AT2G37270.1	Symbols: ATRPS5A, AML1, RPS5A | ribosomal protein 5A | chr3:3778175-3779354 REVERSE LENGTH=207;Symbols: ATRPS5A, AML1, RPS5A | ribosomal protein 5A | chr3:3778175-3779354 REVERSE LENGTH=207;Symbols: ATRPS5B, RPS5B | ribosomal protein 5B | chr2:15647883-	188;772;1795	221
2	2	2.7	2.7	102.04	0	11.658	1201400	4	12	12	12	12	16.001	15.7837	15.8746	15.8864	14.7887	4.13611e-07	AT3G45140.1	AT3G45140.1	Symbols: LOX2, ATLOX2 | lipoxygenase 2 | chr3:16525437-16529233 FORWARD LENGTH=896	669;1675	249
5	5	9.3	9.3	65.029	0	30.698	4653200	11	12	12	12	12	17.5403	18.1077	12	15.8827	14.7502	0.11706	AT5G65010.1;AT5G65010.2;AT5G10240.2;AT5G10240.1	AT5G65010.1;AT5G65010.2	Symbols: ASN2 | asparagine synthetase 2 | chr5:25969224-25972278 FORWARD LENGTH=578;Symbols: ASN2 | asparagine synthetase 2 | chr5:25969224-25972278 FORWARD LENGTH=579	123;285;468;1121;2038	408
22	22	71.1	71.1	49.1	0	323.31	130610000	112	18.3404	19.3005	19.4093	19.0168	22.9308	22.8186	22.9211	22.8901	14.6557	0.000344521	AT2G39730.2;AT2G39730.3;AT2G39730.1	AT2G39730.2;AT2G39730.3;AT2G39730.1	Symbols: RCA | rubisco activase | chr2:16571046-16573345 REVERSE LENGTH=446;Symbols: RCA | rubisco activase | chr2:16571174-16573345 REVERSE LENGTH=441;Symbols: RCA | rubisco activase | chr2:16570951-16573345 REVERSE LENGTH=474	175;385;579;672;695;732;872;975;1166;1167;1265;1277;1293;1294;1360;1530;1572;1614;1774;2040;2041;2053	181
2	2	7.4	7.4	27.707	0	12.399	2779500	6	12	12	12	12	12	17.7934	17.7185	15.8373	14.2938	0.116133	AT5G07090.2;AT2G17360.1;AT5G58420.1;AT5G07090.1;AT2G17360.2	AT5G07090.2;AT2G17360.1;AT5G58420.1;AT5G07090.1;AT2G17360.2	Symbols: | Ribosomal protein S4 (RPS4A) family protein | chr5:2202783-2203805 FORWARD LENGTH=244;Symbols: | Ribosomal protein S4 (RPS4A) family protein | chr2:7546598-7548138 FORWARD LENGTH=261;Symbols: | Ribosomal protein S4 (RPS4A) family protein |	359;1248	140
2	2	3.2	3.2	67.089	0	11.851	1922300	4	12	12	12	12	12	17.3777	18.0713	15.8163	14.0874	0.117574	AT4G16155.1;AT3G16950.1;AT3G16950.2	AT4G16155.1;AT3G16950.1;AT3G16950.2	Symbols: | dihydrolipoyl dehydrogenases | chr4:9153570-9157322 REVERSE LENGTH=630;Symbols: LPD1, ptlpd1 | lipoamide dehydrogenase 1 | chr3:5786761-5790383 REVERSE LENGTH=570;Symbols: LPD1, ptlpd1 | lipoamide dehydrogenase 1 | chr3:5786508-5790383 REVER	106;124	292
2	2	9.2	9.2	29.803	0	15.075	2740200	8	12	12	12	12	17.8165	17.5583	12	15.7916	13.8479	0.116321	AT4G34670.1;AT3G04840.1	AT4G34670.1;AT3G04840.1	Symbols: | Ribosomal protein S3Ae | chr4:16548724-16550222 FORWARD LENGTH=262;Symbols: | Ribosomal protein S3Ae | chr3:1329751-1331418 FORWARD LENGTH=262	201;1772	200
2	2	6.2	6.2	53.82	0	11.508	1741800	2	12	12	12	12	12	16.972	17.9196	15.6305	12.3849	0.119119	AT1G80030.3;AT1G80030.2;AT1G80030.1	AT1G80030.3;AT1G80030.2;AT1G80030.1	Symbols: | Molecular chaperone Hsp40/DnaJ family protein | chr1:30105398-30108873 REVERSE LENGTH=500;Symbols: | Molecular chaperone Hsp40/DnaJ family protein | chr1:30105398-30108873 REVERSE LENGTH=500;Symbols: | Molecular chaperone Hsp40/DnaJ family	103;139	129
16	16	34.5	34.5	63.808	0	141.26	23200000	36	16.6296	16.3379	16.5369	16.5015	20.1517	20.3039	19.9223	20.1259	12.3333	1.33575e-05	AT1G55490.2;AT1G55490.1;AT3G13470.1;AT5G56500.2;AT5G56500.1	AT1G55490.2;AT1G55490.1;AT3G13470.1;AT5G56500.2;AT5G56500.1	Symbols: CPN60B, LEN1 | chaperonin 60 beta | chr1:20715717-20718673 REVERSE LENGTH=600;Symbols: CPN60B, LEN1 | chaperonin 60 beta | chr1:20715717-20718673 REVERSE LENGTH=600;Symbols: | TCP-1/cpn60 chaperonin family protein | chr3:4389685-4392624 FORWAR	228;300;466;474;523;764;941;982;1008;1030;1211;1328;1344;1582;1963;2088	95
3	2	23.3	16.4	15.548	0	43.669	4090400	8	12	12	12	12	18.8929	15.9358	12	15.6096	12.2065	0.14489	AT2G21660.2;AT2G21660.1	AT2G21660.2;AT2G21660.1	Symbols: ATGRP7, CCR2 | cold, circadian rhythm, and rna binding 2 | chr2:9265477-9266316 REVERSE LENGTH=159;Symbols: ATGRP7, CCR2, GR-RBP7, GRP7 | cold, circadian rhythm, and rna binding 2 | chr2:9265477-9266316 REVERSE LENGTH=176	118;612;1648	150
2	2	4.3	4.3	57.4	0	12.182	2587000	5	12	12	12	12	17.2979	17.4592	12	15.5857	12.0062	0.116206	AT4G37930.1;AT5G26780.1;AT5G26780.3;AT5G26780.2	AT4G37930.1;AT5G26780.1;AT5G26780.3;AT5G26780.2	Symbols: SHM1, STM, SHMT1 | serine transhydroxymethyltransferase 1 | chr4:17831891-17834742 REVERSE LENGTH=517;Symbols: SHM2 | serine hydroxymethyltransferase 2 | chr5:9418299-9421725 FORWARD LENGTH=517;Symbols: SHM2 | serine hydroxymethyltransferase 2	1126;2007	325
2	2	6.9	6.9	35.467	0	11.794	1349700	5	12	12	12	12	17.358	16.6738	12	15.3439	10.1538	0.117963	AT4G22890.4;AT4G22890.5;AT4G22890.3;AT4G22890.2;AT4G22890.1	AT4G22890.4;AT4G22890.5;AT4G22890.3;AT4G22890.2;AT4G22890.1	Symbols: PGR5-LIKE A | PGR5-LIKE A | chr4:12007157-12009175 FORWARD LENGTH=321;Symbols: PGR5-LIKE A | PGR5-LIKE A | chr4:12007157-12009175 FORWARD LENGTH=322;Symbols: PGR5-LIKE A | PGR5-LIKE A | chr4:12007157-12009175 FORWARD LENGTH=324;Symbols: PGR5-L	818;1125	301
3	3	5.4	5.4	64.046	0	17.5	2874700	8	12	12	12	12	12	17.0022	16.9959	15.3327	10.0749	0.116117	AT1G72150.1;AT1G22530.1	AT1G72150.1	Symbols: PATL1 | PATELLIN 1 | chr1:27148558-27150652 FORWARD LENGTH=573	1581;1715;2165	117
1	1	2.4	2.4	77.532	0.0026882	6.13	21080000	3	12	12	12	12	12	12	21.8438	15.2813	9.72217	0.373901	AT4G26450.1	AT4G26450.1	Symbols: | unknown protein;Has 614 Blast hits to 492 proteins in 137 species: Archae - 0;Bacteria - 94;Metazoa - 255;Fungi - 76;Plants - 69;Viruses - 0;Other Eukaryotes - 120 (source: NCBI BLink). | chr4:13362556-13364920 FORWARD LENGTH=708	1790	305
3	3	17.4	17.4	28.171	0	20.268	1266200	8	12	12	12	12	16.6654	17.1748	12	15.28	9.71388	0.117181	AT2G01250.1;AT2G44120.1;AT2G44120.2;AT2G01250.2;AT3G13580.3;AT3G13580.2;AT3G13580.1	AT2G01250.1;AT2G44120.1;AT2G44120.2	Symbols: | Ribosomal protein L30/L7 family protein | chr2:132943-134264 REVERSE LENGTH=242;Symbols: | Ribosomal protein L30/L7 family protein | chr2:18249227-18250402 REVERSE LENGTH=242;Symbols: | Ribosomal protein L30/L7 family protein | chr2:182492	353;778;2116	132
17	17	47.8	47.8	50.111	0	210.94	45661000	65	17.8	18.0352	17.9934	17.9428	21.0515	21.2788	21.1222	21.1508	9.24075	5.35976e-06	AT3G12780.1;AT1G56190.2;AT1G56190.1	AT3G12780.1;AT1G56190.2;AT1G56190.1	Symbols: PGK1 | phosphoglycerate kinase 1 | chr3:4061127-4063140 REVERSE LENGTH=481;Symbols: | Phosphoglycerate kinase family protein | chr1:21028622-21030454 FORWARD LENGTH=405;Symbols: | Phosphoglycerate kinase family protein | chr1:21028403-2103045	13;39;424;486;539;563;590;858;942;993;1032;1043;1217;1556;1785;1973;2024	224
3	3	28.7	28.7	12.06	0	19.553	3141200	9	12	15.7359	15.8624	14.5328	17.6582	18.0048	17.4086	17.6905	8.92433	0.0689787	ATCG00650.1	ATCG00650.1	Symbols: RPS18 | ribosomal protein S18 | chrC:67917-68222 FORWARD LENGTH=101	881;1392;1553	429
6	3	19.2	10.9	55.967	0	20.147	2859300	6	12	12	12	12	16.744	12	16.5242	15.0894	8.51139	0.11634	AT1G20620.5;AT1G20620.1;AT1G20620.2;AT1G20620.4	AT1G20620.5;AT1G20620.1;AT1G20620.2;AT1G20620.4	Symbols: CAT3, SEN2, ATCAT3 | catalase 3 | chr1:7143142-7146193 FORWARD LENGTH=485;Symbols: CAT3, SEN2, ATCAT3 | catalase 3 | chr1:7143142-7146193 FORWARD LENGTH=492;Symbols: CAT3, SEN2, ATCAT3 | catalase 3 | chr1:7143142-7145807 FORWARD LENGTH=427;Sym	383;611;710;1092;1110;1177	48
1	1	3.6	3.6	49.624	0.0096852	5.8598	5481600	1	12	12	12	12	12	21.1639	12	15.0546	8.3088	0.373901	AT2G22930.1	AT2G22930.1	Symbols: | UDP-Glycosyltransferase superfamily protein | chr2:9759766-9761094 FORWARD LENGTH=442	1593	152
10	4	55.9	21.9	29.504	0	85.708	11882000	15	12	18.7719	18.6526	16.4748	19.4814	19.3852	19.4663	19.4443	7.83261	0.255211	AT3G01500.1;AT3G01500.3;AT3G01500.2	AT3G01500.1;AT3G01500.3;AT3G01500.2	Symbols: CA1, ATBCA1, SABP3, ATSABP3 | carbonic anhydrase 1 | chr3:194853-196716 REVERSE LENGTH=270;Symbols: CA1 | carbonic anhydrase 1 | chr3:195173-197873 REVERSE LENGTH=336;Symbols: CA1 | carbonic anhydrase 1 | chr3:194853-197873 REVERSE LENGTH=347	60;356;415;686;1369;1929;1947;1992;2161;2182	194
28	27	78.5	76.3	53.933	0	323.31	93189000	123	19.2992	20.1296	19.7354	19.7214	22.6721	22.5782	22.4783	22.5762	7.23417	0.000316351	ATCG00480.1	ATCG00480.1	Symbols: ATPB, PB | ATP synthase subunit beta | chrC:52660-54156 REVERSE LENGTH=498	81;198;207;208;330;339;381;455;583;662;692;814;836;853;937;979;1225;1316;1317;1564;1588;1848;1899;1917;1972;2098;2099;2168	426
10	2	34.9	7.1	40.306	0	64.847	1043800	4	12	12	12	12	12	16.1644	16.0076	14.724	6.60702	0.116263	AT3G14415.3;AT3G14415.1;AT3G14415.2	AT3G14415.3;AT3G14415.1;AT3G14415.2	Symbols: | Aldolase-type TIM barrel family protein | chr3:4818667-4820748 FORWARD LENGTH=367;Symbols: | Aldolase-type TIM barrel family protein | chr3:4818667-4820748 FORWARD LENGTH=367;Symbols: | Aldolase-type TIM barrel family protein | chr3:481866	19;85;279;513;575;751;1274;1283;1357;2048	230
12	12	36.7	36.7	47.41	0	107.94	22222000	50	16.4362	17.4405	16.8129	16.8965	19.4372	19.6424	19.6426	19.5741	6.39756	0.0008802	AT5G35630.3;AT5G35630.2;AT5G35630.1;AT1G66200.1;AT1G66200.3	AT5G35630.3;AT5G35630.2;AT5G35630.1	Symbols: GS2, GLN2, ATGSL1 | glutamine synthetase 2 | chr5:13831220-13833239 FORWARD LENGTH=430;Symbols: GS2, GLN2, ATGSL1 | glutamine synthetase 2 | chr5:13831220-13833239 FORWARD LENGTH=430;Symbols: GS2, GLN2, ATGSL1 | glutamine synthetase 2 | chr5:13	6;7;98;280;632;788;1018;1687;1796;1951;2062;2133	376
3	3	9.4	9.4	37.382	0	19.686	984250	5	12	12	12	12	15.82	15.755	12	14.525	5.75563	0.116146	AT1G76010.1	AT1G76010.1	Symbols: | Alba DNA/RNA-binding protein | chr1:28528505-28530488 REVERSE LENGTH=350	44;1441;1902	121
23	11	49.7	29.6	51.267	0	226	16189000	24	12	21.3744	12	15.1248	17.6548	17.4468	17.7413	17.6143	5.61576	0.470408	CON__P08779;CON__Q9Z2K1;CON__Q3ZAW8	CON__P08779		111;156;182;247;310;469;475;720;860;924;1029;1044;1046;1083;1142;1569;1606;1776;1777;1813;1872;2003;2080	453
5	5	35.3	35.3	17.671	0	154.76	91500000	26	19.4852	19.3047	21.0554	19.9484	21.559	22.1876	23.5147	22.4205	5.54821	0.0366879	AT1G23410.1;AT3G62250.1;AT2G47110.2;AT2G47110.1;AT3G52590.1;AT2G36170.1;AT4G05050.4;AT2G35635.1;AT1G31340.1;AT4G05050.3;AT4G05050.2;AT4G05050.1;AT4G02890.2;AT4G02890.1;AT1G55060.1;AT4G05320.5;AT4G02890.4;AT4G02890.3;AT5G03240.3;AT5G03240.2;AT5G03240.1;AT1G65350.1;AT5G37640.1;AT4G05320.6;AT4G05320.3;AT4G05320.1;AT5G20620.1;AT4G05320.4;AT4G05320.2;AT3G09790.1;CON__P62979	AT1G23410.1;AT3G62250.1;AT2G47110.2;AT2G47110.1;AT3G52590.1;AT2G36170.1;AT4G05050.4;AT2G35635.1;AT1G31340.1;AT4G05050.3;AT4G05050.2;AT4G05050.1;AT4G02890.2;AT4G02890.1;AT1G55060.1;AT4G05320.5;AT4G02890.4;AT4G02890.3;AT5G03240.3;AT5G03240.2;AT5G03240.1;AT1G65350.1;AT5G37640.1;AT4G05320.6;AT4G05320.3;AT4G05320.1;AT5G20620.1;AT4G05320.4;AT4G05320.2;AT3G09790.1	Symbols: | Ribosomal protein S27a / Ubiquitin family protein | chr1:8314940-8315410 FORWARD LENGTH=156;Symbols: UBQ5 | ubiquitin 5 | chr3:23037138-23037611 FORWARD LENGTH=157;Symbols: UBQ6 | ubiquitin 6 | chr2:19344701-19345174 FORWARD LENGTH=157;Symb	462;903;1051;1807;1815	53
3	3	10.7	10.7	45.502	0	20.682	1617000	9	12	12	12	12	15.368	12	15.3581	14.242	4.73063	0.116117	ATCG01110.1	ATCG01110.1	Symbols: NDHH | NAD(P)H dehydrogenase subunit H | chrC:122011-123192 REVERSE LENGTH=393	93;372;911	439
1	1	3.5	3.5	34.973	0.0074627	5.9178	4746200	1	12	12	12	12	12	12	18.6749	14.225	4.67497	0.373901	AT4G00650.1	AT4G00650.1	Symbols: FRI, FLA | FRIGIDA-like protein | chr4:269026-270363 FORWARD LENGTH=314	266	279
1	1	13	13	7.2563	0	7.5349	3278400	3	12	12	12	12	12	12	18.5909	14.197	4.58519	0.373901	AT3G63160.1	AT3G63160.1	Symbols: | FUNCTIONS IN: molecular_function unknown;INVOLVED IN: biological_process unknown;LOCATED IN: chloroplast outer membrane, thylakoid, chloroplast thylakoid membrane, chloroplast, chloroplast envelope;EXPRESSED IN: 21 plant structures;EXPRESS	1623	273
3	1	5.6	2.4	104.12	0	13.106	920750	1	12	12	12	12	12	18.5902	12	14.1967	4.58442	0.373901	AT1G80660.2;AT1G80660.1	AT1G80660.2;AT1G80660.1	Symbols: HA9 | H(+)-ATPase 9 | chr1:30316227-30319948 REVERSE LENGTH=945;Symbols: AHA9, HA9 | H(+)-ATPase 9 | chr1:30316227-30319948 REVERSE LENGTH=954	1139;1300;1478	131
2	2	7.1	7.1	35.723	0	12.088	2869600	4	12	12	12	12	12	12	18.4191	14.1397	4.40674	0.373901	AT3G55360.1	AT3G55360.1	Symbols: CER10, ECR, ATTSC13, TSC13 | 3-oxo-5-alpha-steroid 4-dehydrogenase family protein | chr3:20521186-20522856 REVERSE LENGTH=310	307;1250	262
5	2	21	9.8	30.688	0	26.233	6658500	2	12	12	12	12	18.3682	12	12	14.1227	4.35514	0.373901	AT3G61430.2;AT3G61430.1;AT1G01620.1;AT4G00430.1;AT1G01620.2;AT3G54820.1;AT4G23400.1	AT3G61430.2;AT3G61430.1;AT1G01620.1;AT4G00430.1	Symbols: PIP1A, ATPIP1, PIP1, PIP1;1 | plasma membrane intrinsic protein 1A | chr3:22733657-22735113 FORWARD LENGTH=286;Symbols: PIP1A, ATPIP1, PIP1, PIP1;1 | plasma membrane intrinsic protein 1A | chr3:22733657-22735113 FORWARD LENGTH=286;Symbols: PIP1	1282;1500;1532;1666;1964	268
2	2	13.4	13.4	24.872	0	11.056	2795100	2	12	12	12	12	12	12	18.1175	14.0392	4.11004	0.373901	AT4G27700.1	AT4G27700.1	Symbols: | Rhodanese/Cell cycle control phosphatase superfamily protein | chr4:13826541-13827673 REVERSE LENGTH=224	73;444	310
8	8	16.6	16.6	72.196	0	63.528	5585900	14	12	12	12	12	12	12	17.9899	13.9966	3.99065	0.373901	AT3G13460.2;AT3G13460.4;AT3G13460.1;AT3G13460.3;AT5G61020.2;AT5G61020.1	AT3G13460.2;AT3G13460.4;AT3G13460.1;AT3G13460.3	Symbols: ECT2 | evolutionarily conserved C-terminal region 2 | chr3:4385274-4388220 REVERSE LENGTH=664;Symbols: ECT2 | evolutionarily conserved C-terminal region 2 | chr3:4385274-4388220 REVERSE LENGTH=666;Symbols: ECT2 | evolutionarily conserved C-term	177;457;699;787;1028;1770;1771;1830	226
9	2	29.9	8.8	30.771	0	12.21	2520300	5	12	12	12	12	17.9205	12	12	13.9735	3.9272	0.373901	AT1G59359.1;AT1G58983.1;AT1G58684.1;AT1G58380.1	AT1G59359.1;AT1G58983.1;AT1G58684.1;AT1G58380.1	Symbols: | Ribosomal protein S5 family protein | chr1:21842537-21843733 REVERSE LENGTH=284;Symbols: | Ribosomal protein S5 family protein | chr1:21806279-21807475 REVERSE LENGTH=284;Symbols: | Ribosomal protein S5 family protein | chr1:21770021-21771	192;597;852;1016;1084;1239;1698;1906;2025	99
2	2	17.9	17.9	15.505	0	11.877	2177100	2	12	12	12	12	12	17.7364	12	13.9121	3.76367	0.373901	AT4G27090.1;AT2G20450.1	AT4G27090.1;AT2G20450.1	Symbols: | Ribosomal protein L14 | chr4:13594104-13595187 REVERSE LENGTH=134;Symbols: | Ribosomal protein L14 | chr2:8813923-8815071 FORWARD LENGTH=134	1266;1915	307
1	1	3.4	3.4	31.139	0.0050761	5.9593	1651600	3	12	12	12	12	12	12	17.7081	13.9027	3.73915	0.373901	AT5G01530.1	AT5G01530.1	Symbols: LHCB4.1 | light harvesting complex photosystem II | chr5:209084-210243 FORWARD LENGTH=290	1378	328
1	1	4.7	4.7	21.545	0	7.2686	2344000	6	12	12	12	12	12	12	17.6627	13.8876	3.70009	0.373901	AT3G25520.2;AT5G39740.2;AT5G39740.1;AT3G25520.1	AT3G25520.2;AT5G39740.2;AT5G39740.1;AT3G25520.1	Symbols: ATL5 | ribosomal protein L5 | chr3:9269573-9270434 REVERSE LENGTH=190;Symbols: RPL5B | ribosomal protein L5 B | chr5:15903484-15905185 FORWARD LENGTH=301;Symbols: OLI7, RPL5B | ribosomal protein L5 B | chr5:15903365-15905185 FORWARD LENGTH=301;	125	239
1	1	6.6	6.6	20.735	0	11.126	1715900	3	12	12	12	12	12	12	17.5938	13.8646	3.64169	0.373901	AT1G74730.1	AT1G74730.1	Symbols: | Protein of unknown function (DUF1118) | chr1:28078995-28079831 FORWARD LENGTH=198	50	120
1	1	3.4	3.4	28.72	0	6.3473	1781500	1	12	12	12	12	12	12	17.5415	13.8472	3.59791	0.373901	AT2G36460.2;AT3G52930.1;AT2G36460.1	AT2G36460.2;AT3G52930.1;AT2G36460.1	Symbols: | Aldolase superfamily protein | chr2:15296929-15297732 REVERSE LENGTH=267;Symbols: | Aldolase superfamily protein | chr3:19627383-19628874 REVERSE LENGTH=358;Symbols: | Aldolase superfamily protein | chr2:15296929-15298387 REVERSE LENGTH=35	1382	172
1	1	5	5	17.085	0	11.716	2426600	6	12	12	12	12	12	12	17.5374	13.8458	3.59451	0.373901	AT1G55670.1	AT1G55670.1	Symbols: PSAG | photosystem I subunit G | chr1:20802874-20803356 REVERSE LENGTH=160	581	96
2	2	5.2	5.2	59.72	0	11.604	1142200	3	12	12	12	12	12	17.5091	12	13.8364	3.57112	0.373901	AT3G09260.1;AT1G66270.2;AT1G66280.1;AT1G66270.1	AT3G09260.1;AT1G66270.2;AT1G66280.1;AT1G66270.1	Symbols: PYK10, PSR3.1, BGLU23, LEB | Glycosyl hydrolase superfamily protein | chr3:2840657-2843730 REVERSE LENGTH=524;Symbols: BGLU21 | Glycosyl hydrolase superfamily protein | chr1:24700110-24702995 REVERSE LENGTH=522;Symbols: BGLU22 | Glycosyl hydrol	754;1383	214
9	3	52.5	17	28.344	0	34.544	2110900	5	12	12	12	12	12	12	17.4219	13.8073	3.49989	0.373901	AT5G14740.2;AT5G14740.1;AT5G14740.5;AT5G14740.4;AT5G14740.3	AT5G14740.2;AT5G14740.1;AT5G14740.5;AT5G14740.4;AT5G14740.3	Symbols: CA2, CA18, BETA CA2 | carbonic anhydrase 2 | chr5:4760536-4762382 FORWARD LENGTH=259;Symbols: CA2, CA18, BETA CA2 | carbonic anhydrase 2 | chr5:4758257-4762382 FORWARD LENGTH=331;Symbols: CA2, CA18, BETA CA2 | carbonic anhydrase 2 | chr5:475825	356;415;686;698;926;1369;1947;1999;2182	352
1	1	7.3	7.3	13.764	0	6.8262	2524500	4	12	12	12	12	12	17.4192	12	13.8064	3.4977	0.373901	ATCG01230.1;ATCG00905.1;ATCG00065.1	ATCG01230.1;ATCG00905.1;ATCG00065.1	Symbols: RPS12B, RPS12 | ribosomal protein S12B | chrC:139856-140650 FORWARD LENGTH=123;Symbols: RPS12C, RPS12 | ribosomal protein S12C | chrC:97999-98793 REVERSE LENGTH=123;Symbols: RPS12A, RPS12 | ribosomal protein S12A | chrC:69611-69724 REVERSE LENG	735	415
3	3	5.2	5.2	66.025	0	18.208	3421500	5	12	12	12	12	12	17.3592	12	13.7864	3.44954	0.373901	AT3G58510.3;AT3G58510.2;AT3G58510.1;AT2G42520.1;AT3G58570.1;AT5G63120.1;AT5G63120.2;AT3G01540.1;AT3G01540.4;AT3G01540.3;AT3G01540.2;AT5G14610.2;AT5G14610.1;AT3G06480.1	AT3G58510.3;AT3G58510.2;AT3G58510.1;AT2G42520.1;AT3G58570.1	Symbols: | DEA(D/H)-box RNA helicase family protein | chr3:21640608-21643464 FORWARD LENGTH=612;Symbols: | DEA(D/H)-box RNA helicase family protein | chr3:21640608-21643464 FORWARD LENGTH=612;Symbols: | DEA(D/H)-box RNA helicase family protein | chr3	533;1306;1857	186
4	4	10.9	10.9	44.103	0	28.075	3206100	8	12	12	12	12	17.2049	12	12	13.735	3.32869	0.373901	AT5G23120.1	AT5G23120.1	Symbols: HCF136 | photosystem II stability/assembly factor, chloroplast (HCF136) | chr5:7778154-7780463 FORWARD LENGTH=403	36;615;625;734	366
1	1	0.6	0.6	126.08	0.0094563	5.8323	1918200	1	12	12	12	12	12	12	17.1469	13.7156	3.2844	0.373901	AT5G22450.1	AT5G22450.1	Symbols: | unknown protein;LOCATED IN: chloroplast;EXPRESSED IN: 22 plant structures;EXPRESSED DURING: 13 growth stages;BEST Arabidopsis thaliana protein match is: unknown protein (TAIR:AT2G19390.1);Has 30201 Blast hits to 17322 proteins in 780 spec	1120	362
1	1	5	5	23.917	0	11.027	868800	4	12	12	12	12	17.0964	12	12	13.6988	3.24631	0.373901	AT4G32260.1	AT4G32260.1	Symbols: | ATPase, F0 complex, subunit B/B, bacterial/chloroplast | chr4:15573859-15574586 REVERSE LENGTH=219	423	317
1	1	4.8	4.8	16.586	0.0093023	5.8066	739840	2	12	12	12	12	12	12	16.9996	13.6665	3.17454	0.373901	AT1G65820.1;AT1G65820.2;AT1G65820.3	AT1G65820.1;AT1G65820.2;AT1G65820.3	Symbols: | microsomal glutathione s-transferase, putative | chr1:24485213-24486682 FORWARD LENGTH=146;Symbols: | microsomal glutathione s-transferase, putative | chr1:24485213-24486682 FORWARD LENGTH=162;Symbols: | microsomal glutathione s-transferas	1094	107
2	2	11.5	11.5	25.668	0	11.629	1387400	2	12	12	12	12	12	12	16.9753	13.6584	3.15676	0.373901	AT4G09650.1	AT4G09650.1	Symbols: ATPD | ATP synthase delta-subunit gene | chr4:6100799-6101503 FORWARD LENGTH=234	891;1241	285
1	1	6.1	6.1	15.035	0	6.7049	1636700	6	12	12	12	12	12	12	16.9684	13.6561	3.15169	0.373901	AT4G15000.2;AT4G15000.1;AT3G22230.1;AT2G32220.1	AT4G15000.2;AT4G15000.1;AT3G22230.1;AT2G32220.1	Symbols: | Ribosomal L27e protein family | chr4:8571896-8572387 FORWARD LENGTH=131;Symbols: | Ribosomal L27e protein family | chr4:8571896-8572303 FORWARD LENGTH=135;Symbols: | Ribosomal L27e protein family | chr3:7844136-7844543 REVERSE LENGTH=135;	212	164
2	2	3	3	76.984	0	10.986	961040	1	12	12	12	12	12	12	16.9258	13.6419	3.12083	0.373901	AT5G18190.1;AT3G03940.1	AT5G18190.1;AT3G03940.1	Symbols: | Protein kinase family protein | chr5:6010215-6013724 REVERSE LENGTH=691;Symbols: | Protein kinase family protein | chr3:1014412-1018244 REVERSE LENGTH=701	839;2059	197
2	2	12.5	12.5	29.363	0	12.178	1088400	6	12	12	12	12	12	16.9078	12	13.6359	3.10791	0.373901	AT2G43030.1	AT2G43030.1	Symbols: | Ribosomal protein L3 family protein | chr2:17894898-17895713 FORWARD LENGTH=271	1251;1260	188
19	2	51.2	6	50.585	0	13.079	2417600	2	12	12	12	12	12	12	16.8405	13.6135	3.0599	0.373901	AT5G12250.1	AT5G12250.1	Symbols: TUB6 | beta-6 tubulin | chr5:3961317-3962971 REVERSE LENGTH=449	349;409;552;588;642;643;908;994;1052;1112;1254;1313;1390;1422;1573;2037;2061;2178;2196	345
1	1	9	9	17.843	0	7.5003	1319300	5	12	12	12	12	12	12	16.7354	13.5785	2.98654	0.373901	AT5G60670.1;AT3G53430.1;AT2G37190.1	AT5G60670.1;AT3G53430.1;AT2G37190.1	Symbols: | Ribosomal protein L11 family protein | chr5:24381066-24381566 REVERSE LENGTH=166;Symbols: | Ribosomal protein L11 family protein | chr3:19809895-19810395 REVERSE LENGTH=166;Symbols: | Ribosomal protein L11 family protein | chr2:15619559-15	2078	175
1	1	3.6	3.6	39.64	0	6.4225	1841400	3	12	12	12	12	12	12	16.6568	13.5523	2.93275	0.373901	AT5G11420.1;AT5G25460.1	AT5G11420.1;AT5G25460.1	Symbols: | Protein of unknown function, DUF642 | chr5:3644655-3646991 FORWARD LENGTH=366;Symbols: | Protein of unknown function, DUF642 | chr5:8863430-8865394 FORWARD LENGTH=369	2194	343
2	2	23.2	23.2	17.541	0	13.677	1743600	4	12	12	12	12	12	12	16.6303	13.5434	2.91485	0.373901	AT3G54890.3;AT3G54890.2;AT3G54890.4;AT3G54890.1	AT3G54890.3;AT3G54890.2;AT3G54890.4;AT3G54890.1	Symbols: LHCA1 | photosystem I light harvesting complex gene 1 | chr3:20339961-20340922 REVERSE LENGTH=164;Symbols: LHCA1 | photosystem I light harvesting complex gene 1 | chr3:20339706-20340922 REVERSE LENGTH=207;Symbols: LHCA1 | photosystem I light ha	1446;2169	260
2	2	5.8	5.8	44.463	0	11.739	1060100	3	12	12	12	12	16.5973	12	12	13.5324	2.89273	0.373901	AT1G32060.1	AT1G32060.1	Symbols: PRK | phosphoribulokinase | chr1:11532668-11534406 FORWARD LENGTH=395	589;907	69
2	2	3.5	3.5	66.885	0	11.35	820200	2	12	12	12	12	12	12	16.5219	13.5073	2.84279	0.373901	AT5G60790.1	AT5G60790.1	Symbols: ATGCN1, GCN1 | ABC transporter family protein | chr5:24453760-24455767 REVERSE LENGTH=595	1060;1979	401
3	3	16.1	16.1	29.864	0	18.59	1685500	4	12	12	12	12	12	12	16.5138	13.5046	2.83748	0.373901	ATCG01310.1;ATCG00830.1	ATCG01310.1;ATCG00830.1	Symbols: RPL2.2 | ribosomal protein L2 | chrC:152806-154312 FORWARD LENGTH=274;Symbols: RPL2.1 | ribosomal protein L2 | chrC:84337-85843 REVERSE LENGTH=274	596;756;945	437
1	1	2.1	2.1	73.266	0.0026954	6.1351	739820	2	12	12	12	12	12	12	16.4755	13.4918	2.81246	0.373901	AT4G21150.2;AT4G21150.3;AT4G21150.1	AT4G21150.2;AT4G21150.3;AT4G21150.1	Symbols: HAP6 | ribophorin II (RPN2) family protein | chr4:11278649-11283599 FORWARD LENGTH=678;Symbols: HAP6 | ribophorin II (RPN2) family protein | chr4:11278646-11283599 FORWARD LENGTH=691;Symbols: HAP6 | ribophorin II (RPN2) family protein | chr4:11	202	300
1	1	5	5	37.926	0.0027624	6.2093	1065500	2	12	12	12	12	12	12	16.3856	13.4619	2.75466	0.373901	AT3G63410.1	AT3G63410.1	Symbols: APG1, VTE3, IEP37, E37 | S-adenosyl-L-methionine-dependent methyltransferases superfamily protein | chr3:23415816-23417002 REVERSE LENGTH=338	2102	275
2	2	3.1	3.1	70.032	0	12.423	1433700	3	12	12	12	12	12	16.3442	12	13.4481	2.72844	0.373901	AT5G66420.1;AT5G66420.2	AT5G66420.1;AT5G66420.2	Symbols: | CONTAINS InterPro DOMAIN/s: Uncharacterised conserved protein UCP033271 (InterPro:IPR008322), TIM-barrel signal transduction protein, predicted (InterPro:IPR009215);Has 30201 Blast hits to 17322 proteins in 780 species: Archae - 12;Bacteria	1769;2049	409
2	2	5.6	5.6	47.215	0	11.251	341620	2	12	12	12	12	16.2744	12	12	13.4248	2.68479	0.373901	AT5G36230.1;AT1G65220.1	AT5G36230.1;AT1G65220.1	Symbols: | ARM repeat superfamily protein | chr5:14273519-14276773 FORWARD LENGTH=411;Symbols: | ARM repeat superfamily protein | chr1:24226204-24228799 FORWARD LENGTH=411	1035;1411	377
2	2	6.9	6.9	28.343	0	12.23	1297600	3	12	12	12	12	12	16.2613	12	13.4204	2.67666	0.373901	AT4G01310.1	AT4G01310.1	Symbols: | Ribosomal L5P family protein | chr4:544166-545480 REVERSE LENGTH=262	1122;1136	280
2	2	7.3	7.3	34.244	0	12.254	1017100	3	12	12	12	12	12	16.1966	12	13.3989	2.63693	0.373901	AT5G07220.1	AT5G07220.1	Symbols: ATBAG3, BAG3 | BCL-2-associated athanogene 3 | chr5:2265545-2266720 REVERSE LENGTH=303	8;1059	336
1	1	1.5	1.5	76.45	0.0028011	6.2447	518240	1	12	12	12	12	12	12	16.1944	13.3981	2.63562	0.373901	AT1G51500.1;AT3G21090.1	AT1G51500.1;AT3G21090.1	Symbols: CER5, D3, ABCG12, WBC12, ATWBC12 | ABC-2 type transporter family protein | chr1:19097967-19100972 REVERSE LENGTH=687;Symbols: | ABC-2 type transporter family protein | chr3:7391497-7394933 REVERSE LENGTH=691	1730	89
5	1	25.7	10.9	28.054	0	35.329	745040	1	12	12	12	12	12	12	16.1413	13.3804	2.60346	0.373901	AT2G34420.1;AT2G34430.1;AT2G05100.1;AT2G05070.1;AT3G27690.1	AT2G34420.1;AT2G34430.1	Symbols: LHB1B2, LHCB1.5 | photosystem II light harvesting complex gene B1B2 | chr2:14522716-14523513 REVERSE LENGTH=265;Symbols: LHB1B1, LHCB1.4 | light-harvesting chlorophyll-protein complex II subunit B1 | chr2:14524818-14525618 FORWARD LENGTH=266	430;704;706;1416;2120	167
1	1	10	10	10.439	0.0026178	6.0841	1062600	1	12	12	12	12	12	12	16.0942	13.3647	2.57531	0.373901	AT4G30010.1	AT4G30010.1	Symbols: | unknown protein;FUNCTIONS IN: molecular_function unknown;INVOLVED IN: biological_process unknown;LOCATED IN: mitochondrion, plastid;EXPRESSED IN: 26 plant structures;EXPRESSED DURING: 15 growth stages;Has 39 Blast hits to 39 proteins in	2077	314
2	2	12.4	12.4	23.24	0	21.836	1089000	6	12	12	12	12	12	16.0844	12	13.3615	2.56948	0.373901	ATCG00380.1	ATCG00380.1	Symbols: RPS4 | chloroplast ribosomal protein S4 | chrC:45223-45828 REVERSE LENGTH=201	727;1107	423
9	1	38.4	3.2	27.519	0	127.38	845300	1	12	12	12	12	16.0334	12	12	13.3445	2.53934	0.373901	AT2G31610.1;AT5G35530.1	AT2G31610.1;AT5G35530.1	Symbols: | Ribosomal protein S3 family protein | chr2:13450384-13451669 FORWARD LENGTH=250;Symbols: | Ribosomal protein S3 family protein | chr5:13710355-13712192 REVERSE LENGTH=248	28;419;439;482;531;673;974;1152;1869	163
2	2	15.5	15.5	27.733	0	11.995	604520	7	12	12	12	12	12	12	15.9847	13.3282	2.51094	0.373901	AT3G47470.1	AT3G47470.1	Symbols: LHCA4, CAB4 | light-harvesting chlorophyll-protein complex I subunit A4 | chr3:17493622-17494773 REVERSE LENGTH=251	609;2121	251
1	1	1	1	88.595	0.0051546	6.0002	149290	3	12	12	12	12	12	15.9655	12	13.3218	2.49984	0.373901	AT1G69730.1	AT1G69730.1	Symbols: | Wall-associated kinase family protein | chr1:26228703-26231339 REVERSE LENGTH=792	1090	113
2	2	4.8	4.8	57.448	0	11.025	521060	2	12	12	12	12	12	12	15.9575	13.3192	2.4952	0.373901	AT4G13770.1	AT4G13770.1	Symbols: CYP83A1, REF2 | cytochrome P450, family 83, subfamily A, polypeptide 1 | chr4:7990682-7992282 REVERSE LENGTH=502	828;1865	288
1	1	24.2	24.2	13.487	0.002849	6.3015	671300	2	12	12	12	12	12	12	15.9379	13.3126	2.48396	0.373901	AT2G47400.1	AT2G47400.1	Symbols: CP12-1, CP12 | CP12 domain-containing protein 1 | chr2:19446889-19447263 FORWARD LENGTH=124	463	193
5	3	17.7	14	43.359	0	31.775	922670	7	12	12	12	12	15.878	12	12	13.2927	2.44979	0.373901	AT4G27440.2;AT4G27440.1	AT4G27440.2;AT4G27440.1	Symbols: PORB | protochlorophyllide oxidoreductase B | chr4:13725648-13727107 FORWARD LENGTH=401;Symbols: PORB | protochlorophyllide oxidoreductase B | chr4:13725648-13727107 FORWARD LENGTH=401	146;525;768;1157;1563	308
2	1	7.5	4.2	49.409	0.005	5.9356	725390	3	12	12	12	12	12	12	15.7953	13.2651	2.40346	0.373901	AT4G02930.1	AT4G02930.1	Symbols: | GTP binding Elongation factor Tu family protein | chr4:1295751-1298354 REVERSE LENGTH=454	804;2005	282
1	1	2.9	2.9	29.213	0.0050251	5.9459	584040	2	12	12	12	12	15.7717	12	12	13.2572	2.39038	0.373901	AT5G52470.2;AT5G52470.1;AT4G25630.1	AT5G52470.2;AT5G52470.1;AT4G25630.1	Symbols: FIB1, FBR1, ATFIB1, ATFBR1, SKIP7 | fibrillarin 1 | chr5:21294290-21296409 FORWARD LENGTH=273;Symbols: FIB1, FBR1, ATFIB1, ATFBR1, SKIP7 | fibrillarin 1 | chr5:21294290-21296509 FORWARD LENGTH=308;Symbols: FIB2, ATFIB2 | fibrillarin 2 | chr4:13	769	304
13	1	21.4	2.7	73.628	0	96.993	503020	3	12	12	12	12	12	12	15.745	13.2483	2.37565	0.373901	AT5G28540.1;AT1G09080.2;AT1G09080.1	AT5G28540.1	Symbols: BIP1 | heat shock protein 70 (Hsp 70) family protein | chr5:10540665-10543274 REVERSE LENGTH=669	172;273;347;717;865;866;930;1233;1349;1363;1699;1943;1961	374
4	4	27.7	27.7	20.982	0	28.292	3902600	11	18.7882	17.7085	12	16.1656	17.5925	17.4038	17.2128	17.403	2.35783	0.588859	AT3G03920.1;AT5G18180.1	AT3G03920.1	Symbols: | H/ACA ribonucleoprotein complex, subunit Gar1/Naf1 protein | chr3:1009123-1010379 REVERSE LENGTH=202	899;1311;1867;1930	196
1	1	3.6	3.6	25.518	0.0026738	6.1221	1005000	2	12	12	12	12	15.6869	12	12	13.229	2.344	0.373901	AT4G17560.1;AT5G47190.1	AT4G17560.1;AT5G47190.1	Symbols: | Ribosomal protein L19 family protein | chr4:9780343-9781752 FORWARD LENGTH=225;Symbols: | Ribosomal protein L19 family protein | chr5:19164432-19166064 REVERSE LENGTH=229	1788	295
1	1	3.5	3.5	28.472	0.0027397	6.188	635700	2	12	12	12	12	12	12	15.6795	13.2265	2.34001	0.373901	AT3G60600.1	AT3G60600.1	Symbols: VAP27-1, VAP, (AT)VAP, VAP27 | vesicle associated protein | chr3:22400537-22402408 FORWARD LENGTH=256	1505	266
40	3	29.4	2.5	193.24	0	17.816	1045500	1	12	12	12	12	12	12	15.6749	13.225	2.33752	0.373901	AT3G11130.1;REV__AT1G69270.1	AT3G11130.1	Symbols: | Clathrin, heavy chain | chr3:3482575-3491667 REVERSE LENGTH=1705	3;64;82;165;210;308;380;456;471;515;549;550;554;556;599;666;685;700;701;713;805;827;973;1101;1180;1194;1381;1457;1490;1545;1558;1613;1692;1767;1892;1919;2039;2086;2132;2167	218
13	1	21.4	2.7	73.56	0	8.7685	427870	3	12	12	12	12	12	12	15.6576	13.2192	2.32816	0.373901	AT5G42020.1;AT5G42020.2	AT5G42020.1;AT5G42020.2	Symbols: BIP, BIP2 | Heat shock protein 70 (Hsp 70) family protein | chr5:16807697-16810480 REVERSE LENGTH=668;Symbols: BIP | Heat shock protein 70 (Hsp 70) family protein | chr5:16807697-16810480 REVERSE LENGTH=613	172;273;347;717;865;866;930;1233;1349;1363;1699;1944;1961	382
2	2	26.4	26.4	17.14	0	28.307	1138300	2	12	12	12	12	12	12	15.6497	13.2166	2.32393	0.373901	AT1G26630.1;AT1G26630.2	AT1G26630.1;AT1G26630.2	Symbols: FBR12, ATELF5A-2, ELF5A-2 | Eukaryotic translation initiation factor 5A-1 (eIF-5A 1) protein | chr1:9205968-9207098 FORWARD LENGTH=159;Symbols: FBR12, ATELF5A-2, ELF5A-2 | Eukaryotic translation initiation factor 5A-1 (eIF-5A 1) protein | chr1:9	1102;1594	55
2	2	5.3	5.3	53.78	0	12.474	724020	3	12	12	12	12	12	12	15.6456	13.2152	2.32175	0.373901	AT3G54090.1	AT3G54090.1	Symbols: FLN1 | fructokinase-like 1 | chr3:20028145-20029835 FORWARD LENGTH=471	151;1165	259
2	2	8.6	8.6	24.503	0	11.369	548910	5	12	12	12	12	12	12	15.3858	13.1286	2.18646	0.373901	AT3G62530.1	AT3G62530.1	Symbols: | ARM repeat superfamily protein | chr3:23132219-23133121 FORWARD LENGTH=221	595;1038	272
1	1	0.8	0.8	132.44	0.0025907	6.0531	114540	1	12	12	12	12	12	15.356	12	13.1187	2.17148	0.373901	AT1G70070.1	AT1G70070.1	Symbols: EMB25, PDE317, ISE2 | DEAD/DEAH box helicase, putative | chr1:26390016-26394148 REVERSE LENGTH=1171	1612	114
1	1	3	3	46.55	0.002611	6.0786	291330	2	12	12	12	12	12	12	15.2744	13.0915	2.13089	0.373901	AT4G00090.1	AT4G00090.1	Symbols: | Transducin/WD40 repeat-like superfamily protein | chr4:34234-36594 FORWARD LENGTH=430	770	277
2	1	10.6	6.7	28.491	0	26.968	615480	2	12	12	12	12	12	12	15.2557	13.0852	2.12171	0.373901	AT5G38480.2;AT5G38480.1;AT1G78300.1;AT3G02520.1;AT4G09000.1;AT1G35160.1;AT5G16050.1;AT1G35160.2;AT4G09000.2;AT5G65430.2;AT5G65430.1;AT1G22300.3;AT1G34760.2;AT1G22300.2;AT1G22300.1;AT1G34760.1;AT5G65430.3;AT2G42590.2;AT2G42590.1;AT1G26480.1;AT2G42590.3	AT5G38480.2;AT5G38480.1;AT1G78300.1;AT3G02520.1;AT4G09000.1;AT1G35160.1;AT5G16050.1;AT1G35160.2;AT4G09000.2;AT5G65430.2;AT5G65430.1;AT1G22300.3;AT1G34760.2;AT1G22300.2;AT1G22300.1;AT1G34760.1;AT5G65430.3;AT2G42590.2;AT2G42590.1;AT1G26480.1;AT2G42590.3	Symbols: GRF3, RCI1 | general regulatory factor 3 | chr5:15410277-15411285 FORWARD LENGTH=254;Symbols: GRF3, RCI1 | general regulatory factor 3 | chr5:15410277-15411285 FORWARD LENGTH=255;Symbols: GRF2, 14-3-3OMEGA, GF14 OMEGA | general regulatory facto	323;1033	75
1	1	12	12	10.576	0.0026596	6.0941	1225200	1	12	12	12	12	12	12	15.2268	13.0756	2.10761	0.373901	ATCG00820.1	ATCG00820.1	Symbols: RPS19 | ribosomal protein S19 | chrC:84005-84283 REVERSE LENGTH=92	1100	436
1	1	6.4	6.4	26.008	0.0096618	5.8576	473970	1	12	12	12	12	12	12	15.2094	13.0698	2.09915	0.373901	AT1G74060.1;AT1G74050.1;AT1G18540.1	AT1G74060.1;AT1G74050.1;AT1G18540.1	Symbols: | Ribosomal protein L6 family protein | chr1:27850033-27851299 REVERSE LENGTH=233;Symbols: | Ribosomal protein L6 family protein | chr1:27847256-27848680 REVERSE LENGTH=233;Symbols: | Ribosomal protein L6 family protein | chr1:6377448-637854	180	44
1	1	1.5	1.5	97.953	0	6.9693	490180	6	12	12	12	12	12	12	15.0515	13.0172	2.02394	0.373901	AT4G28470.1;AT2G20580.1	AT4G28470.1;AT2G20580.1	Symbols: RPN1B, ATRPN1B | 26S proteasome regulatory subunit S2 1B | chr4:14067082-14072357 REVERSE LENGTH=891;Symbols: RPN1A, ATRPN1A | 26S proteasome regulatory subunit S2 1A | chr2:8859211-8864699 FORWARD LENGTH=891	543	147
1	1	2.5	2.5	48.744	0	6.4905	382750	2	12	12	12	12	12	12	15.0161	13.0054	2.00744	0.373901	AT5G66680.1	AT5G66680.1	Symbols: DGL1 | dolichyl-diphosphooligosaccharide-protein glycosyltransferase 48kDa subunit family protein | chr5:26617840-26620581 REVERSE LENGTH=437	2028	411
2	2	0.9	0.9	251.38	0	12.017	627300	3	12	12	12	12	15.0014	12	12	13.0005	2.00065	0.373901	AT1G36160.2;AT1G36160.1;AT1G36180.1	AT1G36160.2;AT1G36160.1;AT1G36180.1	Symbols: ACC1 | acetyl-CoA carboxylase 1 | chr1:13534196-13543773 FORWARD LENGTH=2254;Symbols: ACC1, AT-ACC1, EMB22, GK, PAS3 | acetyl-CoA carboxylase 1 | chr1:13534196-13543773 FORWARD LENGTH=2254;Symbols: ACC2 | acetyl-CoA carboxylase 2 | chr1:1354604	108;2115	76
1	1	11.4	11.4	14.544	0	16.9	720320	3	12	12	12	12	12	12	14.9532	12.9844	1.97849	0.373901	AT5G02570.1;AT3G53650.1;AT2G37470.1;AT5G22880.1;AT3G46030.1;AT1G07790.1;AT5G59910.1;AT3G45980.1;AT2G28720.1	AT5G02570.1;AT3G53650.1;AT2G37470.1;AT5G22880.1;AT3G46030.1;AT1G07790.1;AT5G59910.1;AT3G45980.1;AT2G28720.1	Symbols: | Histone superfamily protein | chr5:576742-577140 REVERSE LENGTH=132;Symbols: | Histone superfamily protein | chr3:19889358-19889774 FORWARD LENGTH=138;Symbols: | Histone superfamily protein | chr2:15736832-15737248 FORWARD LENGTH=138;Symb	140	19
1	1	0.8	0.8	160.82	0	11.707	313040	3	12	12	12	12	12	12	14.953	12.9843	1.97841	0.373901	AT4G02510.1	AT4G02510.1	Symbols: TOC159, TOC86, PPI2, TOC160, ATTOC159 | translocon at the outer envelope membrane of chloroplasts 159 | chr4:1104766-1109360 FORWARD LENGTH=1503	1290	281
1	1	1.1	1.1	102.48	0	6.788	623550	4	12	12	12	12	12	12	14.9395	12.9798	1.97225	0.373901	AT3G15980.1;AT3G15980.4;AT3G15980.3;AT3G15980.2;AT1G52360.1;AT3G15980.5;AT1G52360.2	AT3G15980.1;AT3G15980.4;AT3G15980.3;AT3G15980.2;AT1G52360.1;AT3G15980.5;AT1G52360.2	Symbols: | Coatomer, beta subunit | chr3:5411699-5418313 REVERSE LENGTH=909;Symbols: | Coatomer, beta subunit | chr3:5411699-5418313 REVERSE LENGTH=914;Symbols: | Coatomer, beta subunit | chr3:5412015-5418313 REVERSE LENGTH=918;Symbols: | Coatom	794	90
1	1	2.8	2.8	36.221	0	6.7834	654790	6	12	12	12	12	12	12	14.9294	12.9765	1.96764	0.373901	AT2G38750.1	AT2G38750.1	Symbols: ANNAT4 | annexin 4 | chr2:16196582-16198431 REVERSE LENGTH=319	270	179
2	2	8.2	8.2	44.207	0	11.654	471410	1	12	12	12	12	14.8966	12	12	12.9655	1.95279	0.373901	AT2G13360.2;AT2G13360.1	AT2G13360.2;AT2G13360.1	Symbols: AGT, AGT1, SGAT | alanine:glyoxylate aminotransferase | chr2:5539417-5540902 REVERSE LENGTH=401;Symbols: AGT, AGT1, SGAT | alanine:glyoxylate aminotransferase | chr2:5539417-5540902 REVERSE LENGTH=401	14;134	138
1	1	3.3	3.3	66.035	0.0096386	5.8562	91975	0	12	12	12	12	12	12	14.8823	12.9608	1.94633	0.373901	AT1G01660.1	AT1G01660.1	Symbols: | RING/U-box superfamily protein | chr1:240057-242608 REVERSE LENGTH=568	362	2
2	2	5.7	5.7	35.761	0	15.229	166480	3	12	12	12	12	12	12	14.8714	12.9571	1.94146	0.373901	AT1G67730.1	AT1G67730.1	Symbols: YBR159, KCR1, ATKCR1 | beta-ketoacyl reductase 1 | chr1:25391676-25393365 FORWARD LENGTH=318	58;688	111
1	1	3.4	3.4	49.369	0	7.7092	398120	1	12	12	12	12	12	12	14.8498	12.9499	1.93178	0.373901	AT4G29040.1;AT2G20140.1	AT4G29040.1;AT2G20140.1	Symbols: RPT2a | regulatory particle AAA-ATPase 2A | chr4:14312369-14314386 FORWARD LENGTH=443;Symbols: | AAA-type ATPase family protein | chr2:8692736-8694837 FORWARD LENGTH=443	1840	145
1	1	3.2	3.2	49.487	0	6.8538	491770	3	12	12	12	12	12	12	14.8392	12.9464	1.92706	0.373901	AT1G80480.1;AT1G15730.1	AT1G80480.1;AT1G15730.1	Symbols: PTAC17 | plastid transcriptionally active 17 | chr1:30258272-30260570 REVERSE LENGTH=444;Symbols: | Cobalamin biosynthesis CobW-like protein | chr1:5407535-5409937 REVERSE LENGTH=448	895	39
1	1	3.6	3.6	37.572	0	6.4676	237020	0	12	12	12	12	12	12	14.7663	12.9221	1.89488	0.373901	AT1G45000.2;AT5G43010.1;AT1G45000.1	AT1G45000.2;AT5G43010.1;AT1G45000.1	Symbols: | AAA-type ATPase family protein | chr1:17009220-17011607 FORWARD LENGTH=335;Symbols: RPT4A | regulatory particle triple-A ATPase 4A | chr5:17248563-17251014 REVERSE LENGTH=399;Symbols: | AAA-type ATPase family protein | chr1:17009220-1701160	2111	83
5	5	37.7	37.7	21.922	0	33.282	5916400	17	17.9504	17.7845	17.8875	17.8741	17.9905	19.3793	18.918	18.7626	1.85121	0.0968337	AT1G48830.2;AT1G48830.1	AT1G48830.2;AT1G48830.1	Symbols: | Ribosomal protein S7e family protein | chr1:18059854-18060935 REVERSE LENGTH=191;Symbols: | Ribosomal protein S7e family protein | chr1:18059854-18060935 REVERSE LENGTH=191	99;335;745;1291;1836	85
1	1	1.5	1.5	67.327	0	6.3886	219060	0	12	12	12	12	14.6443	12	12	12.8814	1.84221	0.373901	AT5G67030.2;AT5G67030.1	AT5G67030.2;AT5G67030.1	Symbols: ABA1, LOS6, NPQ2, ATABA1, ZEP, IBS3, ATZEP | zeaxanthin epoxidase (ZEP) (ABA1) | chr5:26754026-26757090 REVERSE LENGTH=610;Symbols: ABA1, LOS6, NPQ2, ATABA1, ZEP, IBS3, ATZEP | zeaxanthin epoxidase (ZEP) (ABA1) | chr5:26753745-26757090 REVERSE L	1330	412
2	2	3.3	3.3	65.827	0	13.045	383000	3	12	12	12	12	12	12	14.602	12.8673	1.82429	0.373901	AT5G49460.1;AT3G06650.1	AT5G49460.1;AT3G06650.1	Symbols: ACLB-2 | ATP citrate lyase subunit B 2 | chr5:20055048-20058195 FORWARD LENGTH=608;Symbols: ACLB-1 | ATP-citrate lyase B-1 | chr3:2079247-2082633 REVERSE LENGTH=608	517;1305	207
1	1	1.8	1.8	74.784	0	6.4145	279760	2	12	12	12	12	14.5464	12	12	12.8488	1.80101	0.373901	AT2G04842.1	AT2G04842.1	Symbols: EMB2761 | threonyl-tRNA synthetase, putative / threonine--tRNA ligase, putative | chr2:1698466-1701271 REVERSE LENGTH=650	746	136
1	1	2.2	2.2	75.436	0	6.9019	370910	3	12	12	12	12	12	12	14.5347	12.8449	1.79613	0.373901	AT5G08650.1	AT5G08650.1	Symbols: | Small GTP-binding protein | chr5:2806533-2813220 REVERSE LENGTH=681	377	337
1	1	4.7	4.7	45.751	0	8.0733	351700	7	12	12	12	12	12	12	14.5196	12.8399	1.78987	0.373901	AT5G58290.1	AT5G58290.1	Symbols: RPT3 | regulatory particle triple-A ATPase 3 | chr5:23569155-23571116 FORWARD LENGTH=408	443	400
1	1	1.6	1.6	84.9	0.00271	6.1613	202280	2	12	12	12	12	12	12	14.3687	12.7896	1.72856	0.373901	AT1G53590.1	AT1G53590.1	Symbols: NTMC2TYPE6.1, NTMC2T6.1 | Calcium-dependent lipid-binding (CaLB domain) family protein | chr1:19996556-20000127 FORWARD LENGTH=751	878	92
1	1	5.3	5.3	51.889	0.0027027	6.1418	198060	1	12	12	12	12	12	12	14.3031	12.7677	1.70254	0.373901	AT3G52990.2;AT3G52990.1;AT2G36580.1	AT3G52990.2;AT3G52990.1;AT2G36580.1	Symbols: | Pyruvate kinase family protein | chr3:19649336-19652237 FORWARD LENGTH=474;Symbols: | Pyruvate kinase family protein | chr3:19649046-19652237 FORWARD LENGTH=527;Symbols: | Pyruvate kinase family protein | chr2:15339253-15342781 FORWARD LEN	49	173
2	1	4.3	2.3	59.712	0	12.052	395880	3	12	12	12	12	12	12	14.2683	12.7561	1.68893	0.373901	AT5G08690.1;AT5G08670.1;AT5G08680.1	AT5G08690.1;AT5G08670.1;AT5G08680.1	Symbols: | ATP synthase alpha/beta family protein | chr5:2825739-2828352 FORWARD LENGTH=556;Symbols: | ATP synthase alpha/beta family protein | chr5:2818395-2821149 REVERSE LENGTH=556;Symbols: | ATP synthase alpha/beta family protein | chr5:2821992-2	853;1900	338
1	1	3.4	3.4	74.314	0.0027778	6.2205	199040	1	12	12	12	12	12	12	14.2597	12.7532	1.68555	0.373901	AT5G13650.1;AT5G13650.2	AT5G13650.1;AT5G13650.2	Symbols: | elongation factor family protein | chr5:4397821-4402364 FORWARD LENGTH=675;Symbols: | elongation factor family protein | chr5:4397821-4402364 FORWARD LENGTH=676	2023	349
1	1	20	20	8.3509	0	6.3261	238030	1	12	12	12	12	12	12	14.2398	12.7466	1.67784	0.373901	AT1G68680.1	AT1G68680.1	Symbols: | unknown protein;FUNCTIONS IN: molecular_function unknown;INVOLVED IN: biological_process unknown;LOCATED IN: chloroplast;EXPRESSED IN: 23 plant structures;EXPRESSED DURING: 16 growth stages;Has 20 Blast hits to 20 proteins in 11 species:	546	112
1	1	2.8	2.8	49.251	0	7.5191	281740	5	12	12	12	12	12	12	14.1981	12.7327	1.66176	0.373901	AT3G58140.1	AT3G58140.1	Symbols: | phenylalanyl-tRNA synthetase class IIc family protein | chr3:21529988-21532386 REVERSE LENGTH=429	1039	264
5	5	14.5	14.5	41.786	0	42.884	22705000	23	20.6954	18.6899	20.5848	19.99	21.2655	20.1092	20.7512	20.7086	1.64555	0.381721	AT5G53800.1	AT5G53800.1	Symbols: | unknown protein;Has 30201 Blast hits to 17322 proteins in 780 species: Archae - 12;Bacteria - 1396;Metazoa - 17338;Fungi - 3422;Plants - 5037;Viruses - 0;Other Eukaryotes - 2996 (source: NCBI BLink). | chr5:21848180-21849935 FORWARD LEN	841;1128;1550;1555;1895	394
1	1	6.2	6.2	44.729	0.0050505	5.9493	206210	1	12	12	12	12	12	12	14.0937	12.6979	1.62213	0.373901	AT5G46290.2;AT5G46290.1;AT5G46290.3	AT5G46290.2;AT5G46290.1;AT5G46290.3	Symbols: KASI, KAS1 | 3-ketoacyl-acyl carrier protein synthase I | chr5:18774439-18776629 REVERSE LENGTH=418;Symbols: KASI, KAS1 | 3-ketoacyl-acyl carrier protein synthase I | chr5:18774439-18776629 REVERSE LENGTH=473;Symbols: KASI | 3-ketoacyl-acyl car	956	387
1	1	3	3	57.718	0.0095465	5.8443	281060	3	12	12	12	12	12	12	14.0899	12.6966	1.62074	0.373901	AT5G05010.2;AT5G05010.1	AT5G05010.2;AT5G05010.1	Symbols: | clathrin adaptor complexes medium subunit family protein | chr5:1477137-1479872 FORWARD LENGTH=527;Symbols: | clathrin adaptor complexes medium subunit family protein | chr5:1477137-1479872 FORWARD LENGTH=527	1508	334
2	1	5	2.6	51.481	0	6.3697	249720	1	12	12	12	12	12	14.0522	12	12.6841	1.60667	0.373901	AT5G26000.2;AT5G26000.1	AT5G26000.2;AT5G26000.1	Symbols: TGG1, BGLU38 | thioglucoside glucohydrolase 1 | chr5:9080009-9082347 REVERSE LENGTH=456;Symbols: TGG1, BGLU38 | thioglucoside glucohydrolase 1 | chr5:9079678-9082347 REVERSE LENGTH=541	758;2124	370
1	1	3.3	3.3	46.749	0	6.3923	217770	1	12	12	12	12	12	12	14.0481	12.6827	1.60516	0.373901	AT1G29150.1	AT1G29150.1	Symbols: ATS9, RPN6 | non-ATPase subunit 9 | chr1:10181240-10182499 FORWARD LENGTH=419	485	58
1	1	5.3	5.3	48.02	0	6.9353	379910	3	12	12	12	12	12	12	14.0433	12.6811	1.60336	0.373901	AT1G43190.3;AT1G43190.2;AT1G43190.1	AT1G43190.3;AT1G43190.2;AT1G43190.1	Symbols: PTB3 | polypyrimidine tract-binding protein 3 | chr1:16275432-16278185 REVERSE LENGTH=430;Symbols: PTB3 | polypyrimidine tract-binding protein 3 | chr1:16275432-16278185 REVERSE LENGTH=432;Symbols: PTB3 | polypyrimidine tract-binding protein 3	1430	80
1	1	0.3	0.3	271.51	0.009434	5.8311	415670	1	12	12	12	12	12	12	14.0136	12.6712	1.59239	0.373901	AT4G38780.1;AT1G80070.1	AT4G38780.1;AT1G80070.1	Symbols: | Pre-mRNA-processing-splicing factor | chr4:18101438-18111029 REVERSE LENGTH=2332;Symbols: SUS2, EMB33, EMB177, EMB14 | Pre-mRNA-processing-splicing factor | chr1:30118052-30127574 FORWARD LENGTH=2359	1154	130
19	5	38.3	13.1	51.621	0	79.382	7233700	11	18.0487	20.3613	12	16.8034	17.7158	17.0853	17.5801	17.4604	1.57685	0.805678	CON__P02533;CON__Q6IFX2;CON__P19012;CON__P08727;CON__P19001;CON__Q61782;CON__P35900;CON__Q9D312;CON__Q8N1A0	CON__P02533		111;157;182;232;245;246;470;720;924;1029;1044;1046;1083;1143;1569;1814;1872;2003;2080	446
1	1	5.6	5.6	25.388	0	6.4842	223970	2	12	12	12	12	12	12	13.9044	12.6348	1.55274	0.373901	AT1G17100.1	AT1G17100.1	Symbols: | SOUL heme-binding family protein | chr1:5844766-5845539 FORWARD LENGTH=232	1759	42
1	1	5.7	5.7	18.558	0.0028249	6.282	667400	4	12	12	12	12	12	13.6632	12	12.5544	1.46857	0.373901	ATCG00420.1	ATCG00420.1	Symbols: NDHJ | NADH dehydrogenase subunit J | chrC:48677-49153 REVERSE LENGTH=158	900	424
1	1	0.4	0.4	403.61	0.0027473	6.1964	193970	1	12	12	12	12	12	12	13.5981	12.5327	1.44662	0.373901	AT1G70320.1;AT1G55860.2;AT1G55860.1	AT1G70320.1;AT1G55860.2;AT1G55860.1	Symbols: UPL2 | ubiquitin-protein ligase 2 | chr1:26488745-26501281 REVERSE LENGTH=3658;Symbols: UPL1 | ubiquitin-protein ligase 1 | chr1:20879900-20892910 REVERSE LENGTH=3681;Symbols: UPL1 | ubiquitin-protein ligase 1 | chr1:20879900-20895393 REVERSE L	2000	97
1	1	1.2	1.2	76.462	0.0093677	5.8173	221040	1	12	12	12	12	12	12	13.5736	12.5245	1.43848	0.373901	AT4G16990.1;AT4G16990.2	AT4G16990.1;AT4G16990.2	Symbols: RLM3 | disease resistance protein (TIR-NBS class), putative | chr4:9560155-9564616 FORWARD LENGTH=670;Symbols: RLM3 | disease resistance protein (TIR-NBS class), putative | chr4:9560155-9565225 FORWARD LENGTH=796	801	293
1	1	1.6	1.6	85.586	0.0027174	6.1744	202250	1	12	12	12	12	12	12	13.5723	12.5241	1.43805	0.373901	AT1G63680.1	AT1G63680.1	Symbols: ATMURE, PDE316, MURE | acid-amino acid ligases;ligases;ATP binding;ATP binding;ligases | chr1:23614461-23617247 FORWARD LENGTH=772	638	105
2	2	21.7	21.7	17.545	0	21.976	183550	1	12	12	12	12	12	12	13.5429	12.5143	1.4283	0.373901	AT4G09800.1;AT1G34030.1;AT1G22780.1	AT4G09800.1;AT1G34030.1;AT1G22780.1	Symbols: RPS18C | S18 ribosomal protein | chr4:6173818-6174963 FORWARD LENGTH=152;Symbols: | Ribosomal protein S13/S18 family | chr1:12370285-12371465 REVERSE LENGTH=152;Symbols: PFL, RPS18A, PFL1 | Ribosomal protein S13/S18 family | chr1:8067990-80691	71;1682	51
1	1	4.5	4.5	51.567	0	6.637	190600	1	12	12	12	12	12	12	13.3393	12.4464	1.36267	0.373901	AT5G62390.1	AT5G62390.1	Symbols: ATBAG7, BAG7 | BCL-2-associated athanogene 7 | chr5:25052377-25054170 REVERSE LENGTH=446	1688	403
1	1	9.8	9.8	20.67	0	6.6617	433680	1	12	12	12	12	12	12	13.3216	12.4405	1.35712	0.373901	AT3G06730.1	AT3G06730.1	Symbols: TRX P, TRX z | Thioredoxin z | chr3:2124276-2125845 FORWARD LENGTH=183	1780	208
29	29	60.8	60.8	52.954	0	323.31	907350000	238	25.1952	24.9332	25.1748	25.1011	25.3521	25.8843	25.2031	25.4798	1.30023	0.164943	ATCG00490.1;ATMG00280.1;AT2G07732.1	ATCG00490.1	Symbols: RBCL | ribulose-bisphosphate carboxylases | chrC:54958-56397 FORWARD LENGTH=479	104;142;224;258;290;301;327;413;432;459;460;461;537;629;630;640;641;1072;1073;1220;1255;1367;1458;1786;1914;2081;2082;2136;2163	427
10	7	56.1	35	20.216	0	91.343	43243000	46	20.818	20.9185	20.7713	20.8359	21.0742	21.4836	20.6929	21.0836	1.18728	0.346601	AT1G67090.1;AT1G67090.2	AT1G67090.1	Symbols: RBCS1A | ribulose bisphosphate carboxylase small chain 1A | chr1:25048465-25049249 REVERSE LENGTH=180	392;484;509;863;970;971;990;1182;1524;2127	109
11	11	31.1	31.1	66.5	0	156.49	48921000	48	21.9268	20.5009	21.9949	21.4742	21.4209	21.7203	21.8583	21.6665	1.1426	0.7221	AT1G65280.1	AT1G65280.1	Symbols: | DNAJ heat shock N-terminal domain-containing protein | chr1:24245501-24248521 FORWARD LENGTH=588	348;442;657;668;887;1129;1242;1296;1686;1957;1980	106
6	3	17.8	11.1	42.987	0	44.192	5421300	4	12	18.0262	18.1739	16.0667	18.0691	18.7013	12	16.2568	1.14085	0.951702	AT4G38970.1;AT4G38970.2	AT4G38970.1;AT4G38970.2	Symbols: FBA2 | fructose-bisphosphate aldolase 2 | chr4:18163714-18165659 REVERSE LENGTH=398;Symbols: FBA2 | fructose-bisphosphate aldolase 2 | chr4:18163769-18165659 REVERSE LENGTH=381	133;149;199;1069;1757;1904	326
8	8	10.7	10.7	78.285	0	57.26	18022000	34	20.3008	18.9149	21.2229	20.1462	20.4557	20.161	20.3333	20.3167	1.12541	0.813394	AT1G03910.1;AT1G03910.2	AT1G03910.1;AT1G03910.2	Symbols: | EXPRESSED IN: 25 plant structures;EXPRESSED DURING: 13 growth stages;CONTAINS InterPro DOMAIN/s: Cactin protein, cactus-binding domain, C-terminal (InterPro:IPR019134), Cactin, central region (InterPro:IPR018816);BEST Arabidopsis thaliana p	173;524;683;684;753;773;2060;2107	7
17	17	39.7	39.7	60.466	0	176.18	16005000	36	12	12	15.8113	13.2704	12	15.9427	12	13.3142	1.03084	0.982021	AT3G13860.1	AT3G13860.1	Symbols: HSP60-3A | heat shock protein 60-3A | chr3:4561704-4565133 REVERSE LENGTH=572	17;35;110;181;264;281;762;910;959;1147;1222;1546;1719;1764;1969;1970;2075	227
2	2	7	7	42.475	0	11.57	253210	2	12	12	12	12	12	12	12	12	1	#DIV/0!	AT1G01560.2;AT4G01370.1;AT1G01560.1	AT1G01560.2;AT4G01370.1;AT1G01560.1	Symbols: ATMPK11, MPK11 | MAP kinase 11 | chr1:202345-204189 FORWARD LENGTH=369;Symbols: ATMPK4, MPK4 | MAP kinase 4 | chr4:567219-568889 FORWARD LENGTH=376;Symbols: ATMPK11, MPK11 | MAP kinase 11 | chr1:202345-203662 FORWARD LENGTH=275	512;1124	1
4	4	2.1	2.1	263.76	0	25.563	1566500	8	12	12	12	12	12	12	12	12	1	#DIV/0!	AT1G02080.2;AT1G02080.1	AT1G02080.2;AT1G02080.1	Symbols: | transcription regulators | chr1:373694-386682 FORWARD LENGTH=2377;Symbols: | transcription regulators | chr1:373335-386682 FORWARD LENGTH=2431	115;1093;1727;1922	3
36	36	88.3	88.3	33.687	0	323.31	2402300000	124	12	12	12	12	12	12	12	12	1	#DIV/0!	AT1G09660.1;AT1G09660.2	AT1G09660.1;AT1G09660.2	Symbols: | RNA-binding KH domain-containing protein | chr1:3128032-3130791 REVERSE LENGTH=298;Symbols: | RNA-binding KH domain-containing protein | chr1:3128205-3130791 REVERSE LENGTH=264	186;366;367;416;417;418;448;449;453;667;707;708;728;920;1066;1070;1075;1076;1077;1108;1132;1159;1160;1287;1486;1568;1574;1575;1668;1946;1991;2069;2070;2156;2180;2185	24
2	2	5.2	5.2	59.998	0	13.552	847030	2	12	12	12	12	12	12	12	12	1	#DIV/0!	AT1G13320.2;AT3G25800.2;AT3G25800.1;AT1G13320.3;AT1G13320.1;AT1G25490.1	AT1G13320.2;AT3G25800.2;AT3G25800.1;AT1G13320.3;AT1G13320.1;AT1G25490.1	Symbols: PP2AA3 | protein phosphatase 2A subunit A3 | chr1:4563970-4567348 REVERSE LENGTH=537;Symbols: PDF1, PR 65, PP2AA2 | protein phosphatase 2A subunit A2 | chr3:9423036-9425783 REVERSE LENGTH=544;Symbols: PDF1, PR 65, PP2AA2 | protein phosphatase	1137;1586	32
1	1	1.1	1.1	120.05	0.0027701	6.218	0	0	12	12	12	12	12	12	12	12	1	#DIV/0!	AT1G29740.1	AT1G29740.1	Symbols: | Leucine-rich repeat transmembrane protein kinase | chr1:10407379-10412997 REVERSE LENGTH=1078	1322	61
1	1	4.5	4.5	32.602	0.0097561	5.8707	0	0	12	12	12	12	12	12	12	12	1	#DIV/0!	AT1G30630.1	AT1G30630.1	Symbols: | Coatomer epsilon subunit | chr1:10858546-10860173 REVERSE LENGTH=292	184	66
17	3	53.6	12.4	46.762	0	17.401	788040	4	12	12	12	12	12	12	12	12	1	#DIV/0!	AT1G54270.1;AT1G54270.2;AT3G19760.1	AT1G54270.1;AT1G54270.2	Symbols: EIF4A-2 | eif4a-2 | chr1:20260495-20262018 FORWARD LENGTH=412;Symbols: EIF4A-2 | eif4a-2 | chr1:20260495-20262018 FORWARD LENGTH=407	120;276;422;591;661;675;880;980;1012;1085;1292;1307;1536;1711;1768;1975;2018	93
7	1	8.5	1.6	100.23	0	8.295	0	0	12	12	12	12	12	12	12	12	1	#DIV/0!	AT1G59610.1	AT1G59610.1	Symbols: ADL3, CF1, DRP2B, DL3 | dynamin-like 3 | chr1:21893413-21900780 FORWARD LENGTH=920	84;767;775;810;1058;1281;1700	100
1	1	3	3	49.032	0.002809	6.2629	0	0	12	12	12	12	12	12	12	12	1	#DIV/0!	AT1G60780.1;AT1G10730.1	AT1G60780.1;AT1G10730.1	Symbols: HAP13 | Clathrin adaptor complexes medium subunit family protein | chr1:22369289-22371885 REVERSE LENGTH=428;Symbols: | Clathrin adaptor complexes medium subunit family protein | chr1:3565463-3567779 FORWARD LENGTH=428	67	28
2	2	3.4	3.4	86.057	0	12.143	1175600	2	12	12	12	12	12	12	12	12	1	#DIV/0!	AT1G62750.1	AT1G62750.1	Symbols: ATSCO1, ATSCO1/CPEF-G, SCO1 | Translation elongation factor EFG/EF2 protein | chr1:23233622-23236321 REVERSE LENGTH=783	1096;1954	104
1	1	0.9	0.9	244.25	0.0026525	6.0939	0	0	12	12	12	12	12	12	12	12	1	#DIV/0!	AT1G67140.1;AT1G67140.2;AT1G67140.3	AT1G67140.1;AT1G67140.2;AT1G67140.3	Symbols: SWEETIE | HEAT repeat-containing protein | chr1:25101016-25117372 REVERSE LENGTH=2221;Symbols: SWEETIE | HEAT repeat-containing protein | chr1:25101016-25117372 REVERSE LENGTH=2222;Symbols: SWEETIE | HEAT repeat-containing protein | chr1:251010	1616	110
3	3	7.6	7.6	54.107	0	18.494	1902600	3	12	12	12	12	12	12	12	12	1	#DIV/0!	AT1G76030.1;AT1G20260.1;AT4G38510.4;AT4G38510.3;AT4G38510.2;AT4G38510.1;AT4G38510.5	AT1G76030.1;AT1G20260.1;AT4G38510.4;AT4G38510.3;AT4G38510.2;AT4G38510.1;AT4G38510.5	Symbols: | ATPase, V1 complex, subunit B protein | chr1:28534134-28536916 FORWARD LENGTH=486;Symbols: | ATPase, V1 complex, subunit B protein | chr1:7016971-7020290 FORWARD LENGTH=487;Symbols: | ATPase, V1 complex, subunit B protein | chr4:18011155-1	223;576;1862	46
5	5	10.8	10.8	68.812	0	31.431	2562500	5	12	12	12	12	12	12	12	12	1	#DIV/0!	AT1G78900.2;AT1G78900.1	AT1G78900.2;AT1G78900.1	Symbols: VHA-A | vacuolar ATP synthase subunit A | chr1:29660463-29664575 FORWARD LENGTH=623;Symbols: VHA-A | vacuolar ATP synthase subunit A | chr1:29660463-29664575 FORWARD LENGTH=623	1098;1270;1370;1887;2191	124
1	1	4.6	4.6	86.084	0	6.6194	0	0	12	12	12	12	12	12	12	12	1	#DIV/0!	AT2G02150.1	AT2G02150.1	Symbols: | Tetratricopeptide repeat (TPR)-like superfamily protein | chr2:550340-552625 REVERSE LENGTH=761	358	133
2	2	11.6	11.6	27.859	0	12.55	2075900	2	12	12	12	12	12	12	12	12	1	#DIV/0!	AT2G18020.1;AT4G36130.1;AT3G51190.1	AT2G18020.1;AT4G36130.1;AT3G51190.1	Symbols: EMB2296 | Ribosomal protein L2 family | chr2:7837151-7838160 FORWARD LENGTH=258;Symbols: | Ribosomal protein L2 family | chr4:17097613-17098656 FORWARD LENGTH=258;Symbols: | Ribosomal protein L2 family | chr3:19016606-19017547 REVERSE LENGTH=	143;178	141
1	1	3.4	3.4	43.65	0.0027248	6.1785	0	0	12	12	12	12	12	12	12	12	1	#DIV/0!	AT2G22690.2;AT2G22690.1	AT2G22690.2;AT2G22690.1	Symbols: | zinc ion binding | chr2:9649820-9650965 REVERSE LENGTH=381;Symbols: | zinc ion binding | chr2:9649820-9650965 REVERSE LENGTH=381	63	151
1	1	2	2	63.258	0.0095238	5.8434	107990	1	12	12	12	12	12	12	12	12	1	#DIV/0!	AT2G24700.1	AT2G24700.1	Symbols: | Transcriptional factor B3 family protein | chr2:10513049-10515288 REVERSE LENGTH=555	369	153
1	1	1.3	1.3	87.507	0	6.3477	207710	3	12	12	12	12	12	12	12	12	1	#DIV/0!	AT2G28360.1;AT3G45190.1;AT1G07990.1	AT2G28360.1;AT3G45190.1;AT1G07990.1	Symbols: | SIT4 phosphatase-associated family protein | chr2:12124604-12129879 REVERSE LENGTH=788;Symbols: | SIT4 phosphatase-associated family protein | chr3:16541994-16548161 REVERSE LENGTH=789;Symbols: | SIT4 phosphatase-associated family protein	936	21
2	1	2.2	1.3	116.22	0	9.6102	0	2	12	12	12	12	12	12	12	12	1	#DIV/0!	AT2G28620.1;AT2G36200.1;AT2G36200.2	AT2G28620.1;AT2G36200.1;AT2G36200.2	Symbols: | P-loop containing nucleoside triphosphate hydrolases superfamily protein | chr2:12265167-12270020 REVERSE LENGTH=1042;Symbols: | P-loop containing nucleoside triphosphate hydrolases superfamily protein | chr2:15180078-15185189 REVERSE LENGTH	1449;1494	159
3	3	3.2	3.2	105.99	0	20.922	1101500	5	12	12	12	12	12	12	12	12	1	#DIV/0!	AT2G29140.1;AT2G29200.1;AT2G29190.2;AT2G29190.1;AT3G10360.1	AT2G29140.1;AT2G29200.1;AT2G29190.2;AT2G29190.1	Symbols: APUM3, PUM3 | pumilio 3 | chr2:12531392-12535060 FORWARD LENGTH=964;Symbols: APUM1, PUM1 | pumilio 1 | chr2:12549483-12553185 REVERSE LENGTH=968;Symbols: PUM2 | pumilio 2 | chr2:12544260-12548071 REVERSE LENGTH=972;Symbols: APUM2, PUM2 | pumil	89;496;2009	161
33	17	64.8	42.1	61.477	0	189.54	23193000	47	12	12	12	12	12	12	12	12	1	#DIV/0!	AT2G33210.2;AT2G33210.1	AT2G33210.2;AT2G33210.1	Symbols: HSP60-2 | heat shock protein 60-2 | chr2:14075093-14078568 REVERSE LENGTH=580;Symbols: HSP60-2 | heat shock protein 60-2 | chr2:14075093-14078568 REVERSE LENGTH=585	26;76;150;231;314;388;405;743;763;846;847;859;918;989;1049;1148;1149;1223;1234;1299;1429;1431;1503;1518;1689;1738;1766;1820;1863;2010;2011;2074;2079	165
2	2	14.6	14.6	14.617	0	11.675	690800	2	12	12	12	12	12	12	12	12	1	#DIV/0!	AT2G34160.1;AT1G29250.1;AT3G04620.1	AT2G34160.1;AT1G29250.1;AT3G04620.1	Symbols: | Alba DNA/RNA-binding protein | chr2:14426283-14427220 FORWARD LENGTH=130;Symbols: | Alba DNA/RNA-binding protein | chr1:10223461-10224592 REVERSE LENGTH=130;Symbols: | Alba DNA/RNA-binding protein | chr3:1255660-1256739 REVERSE LENGTH=164	1004;1398	59
2	2	4.5	4.5	47.855	0	11.524	1052900	2	12	12	12	12	12	12	12	12	1	#DIV/0!	AT2G35840.3;AT2G35840.2;AT2G35840.1;AT1G51420.1	AT2G35840.3;AT2G35840.2;AT2G35840.1;AT1G51420.1	Symbols: | Sucrose-6F-phosphate phosphohydrolase family protein | chr2:15053952-15055776 FORWARD LENGTH=422;Symbols: | Sucrose-6F-phosphate phosphohydrolase family protein | chr2:15053952-15055776 FORWARD LENGTH=422;Symbols: | Sucrose-6F-phosphate ph	511;1949	169
4	2	11.8	6.2	42.497	0	11.499	1340100	2	12	12	12	12	12	12	12	12	1	#DIV/0!	AT2G36880.2;AT2G36880.1	AT2G36880.2;AT2G36880.1	Symbols: MAT3 | methionine adenosyltransferase 3 | chr2:15479721-15480893 REVERSE LENGTH=390;Symbols: MAT3 | methionine adenosyltransferase 3 | chr2:15479721-15480893 REVERSE LENGTH=390	582;1354;1619;1792	174
1	1	1.2	1.2	117.58	0	6.6676	0	0	12	12	12	12	12	12	12	12	1	#DIV/0!	AT2G37420.1	AT2G37420.1	Symbols: | ATP binding microtubule motor family protein | chr2:15700550-15705165 FORWARD LENGTH=1039	1713	176
1	1	1.3	1.3	85.305	0.0050125	5.9424	0	1	12	12	12	12	12	12	12	12	1	#DIV/0!	AT2G38040.2;AT2G38040.1	AT2G38040.2;AT2G38040.1	Symbols: CAC3 | acetyl Co-enzyme a carboxylase carboxyltransferase alpha subunit | chr2:15917612-15920749 FORWARD LENGTH=769;Symbols: CAC3 | acetyl Co-enzyme a carboxylase carboxyltransferase alpha subunit | chr2:15917612-15920749 FORWARD LENGTH=769	1856	177
12	12	60.8	60.8	31.721	0	245.56	61354000	32	12	12	12	12	12	12	12	12	1	#DIV/0!	AT2G38610.2;AT2G38610.1	AT2G38610.2;AT2G38610.1	Symbols: | RNA-binding KH domain-containing protein | chr2:16147552-16149638 REVERSE LENGTH=286;Symbols: | RNA-binding KH domain-containing protein | chr2:16147552-16149638 REVERSE LENGTH=286	365;421;1080;1163;1224;1252;1464;1465;1629;1695;2063;2064	178
1	1	9.5	9.5	9.405	0	7.1445	678200	4	12	12	12	12	12	12	12	12	1	#DIV/0!	AT2G45710.1;AT3G61110.1	AT2G45710.1;AT3G61110.1	Symbols: | Zinc-binding ribosomal protein family protein | chr2:18831243-18831999 FORWARD LENGTH=84;Symbols: ARS27A, RS27A | ribosomal protein S27 | chr3:22611710-22612632 FORWARD LENGTH=86	1243	191
1	1	4	4	42.501	0	6.6642	796940	3	12	12	12	12	12	12	12	12	1	#DIV/0!	AT3G07030.1	AT3G07030.1	Symbols: | Alba DNA/RNA-binding protein | chr3:2223001-2225254 REVERSE LENGTH=405	1913	209
40	3	29.2	2.3	193.27	0	313.28	1683700	2	12	12	12	12	12	12	12	12	1	#DIV/0!	AT3G08530.1	AT3G08530.1	Symbols: | Clathrin, heavy chain | chr3:2587171-2595411 REVERSE LENGTH=1703	4;33;64;82;165;210;308;380;456;471;549;550;554;556;562;599;666;685;700;701;713;805;827;973;1101;1180;1194;1381;1457;1490;1545;1613;1692;1767;1892;1919;2039;2086;2132;2167	210
5	5	23.3	23.3	31.501	0	70.139	13505000	14	12	12	12	12	12	12	12	12	1	#DIV/0!	AT3G08620.1	AT3G08620.1	Symbols: | RNA-binding KH domain-containing protein | chr3:2617925-2620314 FORWARD LENGTH=283	420;928;1109;1161;1860	212
1	1	3.2	3.2	55.62	0.009828	5.8845	0	0	12	12	12	12	12	12	12	12	1	#DIV/0!	AT3G11890.1;AT3G11890.2	AT3G11890.1;AT3G11890.2	Symbols: | Sterile alpha motif (SAM) domain-containing protein | chr3:3756026-3757609 FORWARD LENGTH=500;Symbols: | Sterile alpha motif (SAM) domain-containing protein | chr3:3756026-3757609 FORWARD LENGTH=527	716	220
8	1	32.4	7.7	41.674	0	9.2168	192130	2	12	12	12	12	12	12	12	12	1	#DIV/0!	AT3G12110.1;AT5G59370.2;AT5G59370.1;AT3G46520.1	AT3G12110.1;AT5G59370.2;AT5G59370.1;AT3G46520.1	Symbols: ACT11 | actin-11 | chr3:3858116-3859609 FORWARD LENGTH=377;Symbols: ACT4 | actin 4 | chr5:23950109-23951586 FORWARD LENGTH=377;Symbols: ACT4 | actin 4 | chr5:23950109-23951586 FORWARD LENGTH=377;Symbols: ACT12 | actin-12 | chr3:17128567-171299	72;255;299;412;802;951;1334;1883	222
1	1	2.7	2.7	39.862	0	7.5881	0	1	12	12	12	12	12	12	12	12	1	#DIV/0!	AT3G20820.1	AT3G20820.1	Symbols: | Leucine-rich repeat (LRR) family protein | chr3:7280930-7282027 FORWARD LENGTH=365	1050	234
1	1	3.9	3.9	52.145	0.0092593	5.8032	0	0	12	12	12	12	12	12	12	12	1	#DIV/0!	AT3G22250.1	AT3G22250.1	Symbols: | UDP-Glycosyltransferase superfamily protein | chr3:7867806-7870053 FORWARD LENGTH=461	141	235
1	1	4.1	4.1	51.458	0.0094118	5.8204	0	0	12	12	12	12	12	12	12	12	1	#DIV/0!	AT3G22890.1	AT3G22890.1	Symbols: APS1 | ATP sulfurylase 1 | chr3:8112837-8114734 FORWARD LENGTH=463	1273	236
39	23	67.1	46.8	61.28	0	323.31	60693000	69	12	12	12	12	12	12	12	12	1	#DIV/0!	AT3G23990.1	AT3G23990.1	Symbols: HSP60, HSP60-3B | heat shock protein 60 | chr3:8669013-8672278 FORWARD LENGTH=577	25;76;90;148;150;230;314;388;405;427;658;743;766;844;845;859;922;957;958;1148;1150;1184;1223;1429;1435;1504;1518;1544;1584;1585;1738;1820;1821;1971;2010;2012;2074;2079;2085	238
1	1	4	4	85.457	0.0050633	5.9564	0	0	12	12	12	12	12	12	12	12	1	#DIV/0!	AT3G27170.1	AT3G27170.1	Symbols: CLC-B, ATCLC-B | chloride channel B | chr3:10024147-10026921 FORWARD LENGTH=780	1308	242
1	1	2	2	59.788	0	6.664	112370	1	12	12	12	12	12	12	12	12	1	#DIV/0!	AT3G51950.2;AT3G51950.1	AT3G51950.2;AT3G51950.1	Symbols: | Zinc finger (CCCH-type) family protein / RNA recognition motif (RRM)-containing protein | chr3:19278244-19280407 REVERSE LENGTH=540;Symbols: | Zinc finger (CCCH-type) family protein / RNA recognition motif (RRM)-containing protein | chr3:192	752	255
2	2	2.8	2.8	35.965	0	11.497	0	0	12	12	12	12	12	12	12	12	1	#DIV/0!	AT3G52390.2	AT3G52390.2	Symbols: | TatD related DNase | chr3:19423105-19425183 REVERSE LENGTH=323	183;1276	257
1	1	17.4	17.4	8.1216	0.0098765	5.8895	0	1	12	12	12	12	12	12	12	12	1	#DIV/0!	AT3G59540.1;AT2G43460.1	AT3G59540.1;AT2G43460.1	Symbols: | Ribosomal L38e protein family | chr3:21995897-21996742 REVERSE LENGTH=69;Symbols: | Ribosomal L38e protein family | chr2:18046285-18047292 REVERSE LENGTH=69	2181	189
1	1	3.6	3.6	39.235	0.0095012	5.8409	0	0	12	12	12	12	12	12	12	12	1	#DIV/0!	AT3G61700.1;AT3G61700.2	AT3G61700.1;AT3G61700.2	Symbols: | Plant protein 1589 of unknown function | chr3:22836414-22838803 FORWARD LENGTH=359;Symbols: | Plant protein 1589 of unknown function | chr3:22836414-22838803 FORWARD LENGTH=364	237	269
1	1	0.3	0.3	471	0.0027322	6.179	0	1	12	12	12	12	12	12	12	12	1	#DIV/0!	AT4G17140.1;AT4G17140.2;AT4G17140.3	AT4G17140.1;AT4G17140.2;AT4G17140.3	Symbols: | pleckstrin homology (PH) domain-containing protein | chr4:9613617-9636618 REVERSE LENGTH=4216;Symbols: | pleckstrin homology (PH) domain-containing protein | chr4:9613617-9636618 REVERSE LENGTH=4218;Symbols: | pleckstrin homology (PH) doma	1158	294
1	1	1	1	117.75	0	7.5781	267320	1	12	12	12	12	12	12	12	12	1	#DIV/0!	AT4G18240.1	AT4G18240.1	Symbols: ATSS4, SSIV, SS4 | starch synthase 4 | chr4:10082221-10087044 FORWARD LENGTH=1040	1952	296
8	6	30.5	26	33.588	0	79.217	22066000	14	12	12	12	12	12	12	12	12	1	#DIV/0!	AT4G26480.1	AT4G26480.1	Symbols: | RNA-binding KH domain-containing protein | chr4:13372885-13375793 REVERSE LENGTH=308	40;1169;1703;1704;1745;1933;2084;2176	306
1	1	9.1	9.1	15.91	0	6.7146	0	0	12	12	12	12	12	12	12	12	1	#DIV/0!	AT4G29410.2;AT4G29410.1;AT2G19730.3;AT2G19730.2;AT2G19730.1	AT4G29410.2;AT4G29410.1;AT2G19730.3;AT2G19730.2;AT2G19730.1	Symbols: | Ribosomal L28e protein family | chr4:14468439-14469964 REVERSE LENGTH=143;Symbols: | Ribosomal L28e protein family | chr4:14468439-14469964 REVERSE LENGTH=143;Symbols: | Ribosomal L28e protein family | chr2:8511752-8512995 FORWARD LENGTH=1	204	143
14	1	22.3	2.7	104.4	0	7.0782	0	0	12	12	12	12	12	12	12	12	1	#DIV/0!	AT4G30190.1;AT4G30190.2;AT2G24520.1;AT3G47950.1;AT1G17260.1;AT3G42640.1;AT2G07560.1;AT3G60330.2;AT3G60330.1	AT4G30190.1;AT4G30190.2	Symbols: AHA2, PMA2, HA2 | H(+)-ATPase 2 | chr4:14770820-14775920 REVERSE LENGTH=948;Symbols: HA2 | H(+)-ATPase 2 | chr4:14770820-14775920 REVERSE LENGTH=981	12;129;476;744;798;953;984;1097;1141;1203;1237;1300;1718;1948	315
3	3	6.8	6.8	43.723	0	17.132	2449300	7	12	12	12	12	12	12	12	12	1	#DIV/0!	AT4G35250.1	AT4G35250.1	Symbols: | NAD(P)-binding Rossmann-fold superfamily protein | chr4:16771401-16773269 REVERSE LENGTH=395	1164;1249;2175	323
1	1	5.2	5.2	40.654	0.0051282	5.9798	0	0	12	12	12	12	12	12	12	12	1	#DIV/0!	AT5G03560.2	AT5G03560.2	Symbols: | Tetratricopeptide repeat (TPR)-like superfamily protein | chr5:901452-902719 REVERSE LENGTH=363	1321	333
1	1	1.1	1.1	126.24	0.0027855	6.2247	302390	1	12	12	12	12	12	12	12	12	1	#DIV/0!	AT5G09350.1	AT5G09350.1	Symbols: PI-4KBETA2, PI4KBETA2 | phosphatidylinositol 4-OH kinase beta2 | chr5:2899365-2905610 REVERSE LENGTH=1116	1740	339
2	2	11	11	29.607	0	11.835	2181500	2	12	12	12	12	12	12	12	12	1	#DIV/0!	AT5G13430.1;AT5G13440.1	AT5G13430.1;AT5G13440.1	Symbols: | Ubiquinol-cytochrome C reductase iron-sulfur subunit | chr5:4305414-4307399 REVERSE LENGTH=272;Symbols: | Ubiquinol-cytochrome C reductase iron-sulfur subunit | chr5:4308431-4310022 REVERSE LENGTH=274	59;1042	347
10	2	33.3	6.2	49.654	0	23.196	2422500	6	12	12	12	12	12	12	12	12	1	#DIV/0!	AT5G19780.1;AT5G19770.1	AT5G19780.1;AT5G19770.1	Symbols: TUA5 | tubulin alpha-5 | chr5:6687212-6688926 FORWARD LENGTH=450;Symbols: TUA3 | tubulin alpha-3 | chr5:6682761-6684474 REVERSE LENGTH=450	211;235;338;361;414;992;1123;1238;1488;1663	357
2	2	8.6	8.6	47.156	0	12.952	1012500	2	12	12	12	12	12	12	12	12	1	#DIV/0!	AT5G20000.1;AT5G19990.1	AT5G20000.1;AT5G19990.1	Symbols: | AAA-type ATPase family protein | chr5:6756915-6759550 FORWARD LENGTH=419;Symbols: RPT6A, ATSUG1 | regulatory particle triple-A ATPase 6A | chr5:6752144-6754918 FORWARD LENGTH=419	390;1841	358
1	1	10.8	10.8	15.637	0	7.0339	0	0	12	12	12	12	12	12	12	12	1	#DIV/0!	AT5G22530.1	AT5G22530.1	Symbols: | unknown protein;BEST Arabidopsis thaliana protein match is: unknown protein (TAIR:AT5G22520.1);Has 30201 Blast hits to 17322 proteins in 780 species: Archae - 12;Bacteria - 1396;Metazoa - 17338;Fungi - 3422;Plants - 5037;Viruses - 0;Ot	1327	363
1	1	2.4	2.4	95.816	0	6.4555	0	0	12	12	12	12	12	12	12	12	1	#DIV/0!	AT5G38350.1	AT5G38350.1	Symbols: | Disease resistance protein (NBS-LRR class) family | chr5:15328659-15331528 FORWARD LENGTH=833	1303	379
19	2	49.8	4.7	49.823	0	26.154	2092000	7	12	12	12	12	12	12	12	12	1	#DIV/0!	AT5G44340.1;CON__ENSEMBL:ENSBTAP00000025008	AT5G44340.1	Symbols: TUB4 | tubulin beta chain 4 | chr5:17859442-17860994 REVERSE LENGTH=444	214;408;552;644;645;821;908;994;1040;1052;1112;1314;1390;1422;1573;1633;1722;2061;2179	384
1	1	2.9	2.9	40.141	0	6.6489	0	0	12	12	12	12	12	12	12	12	1	#DIV/0!	AT5G45620.2;AT5G45620.1	AT5G45620.2;AT5G45620.1	Symbols: | Proteasome component (PCI) domain protein | chr5:18501590-18503422 FORWARD LENGTH=350;Symbols: | Proteasome component (PCI) domain protein | chr5:18501590-18503868 FORWARD LENGTH=386	16	386
1	1	3.8	3.8	28.706	0.0025974	6.0543	0	1	12	12	12	12	12	12	12	12	1	#DIV/0!	AT5G54270.1	AT5G54270.1	Symbols: LHCB3, LHCB3*1 | light-harvesting chlorophyll B-binding protein 3 | chr5:22038424-22039383 FORWARD LENGTH=265	1932	395
8	6	32.7	25.4	33.984	0	39.494	7753300	13	12	12	12	12	12	12	12	12	1	#DIV/0!	AT5G56140.1	AT5G56140.1	Symbols: | RNA-binding KH domain-containing protein | chr5:22725462-22727932 FORWARD LENGTH=315	40;407;1162;1706;1742;1806;1934;2176	397
1	1	0.7	0.7	156.36	0	6.8735	395810	4	12	12	12	12	12	12	12	12	1	#DIV/0!	ATCG00170.1	ATCG00170.1	Symbols: RPOC2 | DNA-directed RNA polymerase family protein | chrC:15938-20068 REVERSE LENGTH=1376	832	419
2	2	3.5	3.5	78.582	0	11.252	347160	2	12	12	12	12	12	12	12	12	1	#DIV/0!	ATCG00180.1	ATCG00180.1	Symbols: RPOC1 | DNA-directed RNA polymerase family protein | chrC:20251-23084 REVERSE LENGTH=680	411;1105	420
2	2	2.5	2.5	121.06	0	18.067	508230	5	12	12	12	12	12	12	12	12	1	#DIV/0!	ATCG00190.1	ATCG00190.1	Symbols: RPOB | RNA polymerase subunit beta | chrC:23111-26329 REVERSE LENGTH=1072	655;1739	421
2	2	21.6	21.6	10.718	0	12.05	431290	2	12	12	12	12	12	12	12	12	1	#DIV/0!	ATCG01120.1	ATCG01120.1	Symbols: RPS15 | chloroplast ribosomal protein S15 | chrC:123296-123562 REVERSE LENGTH=88	434;1554	440
20	1	35.8	3	59.998	0	13.02	462250	1	12	12	12	12	12	12	12	12	1	#DIV/0!	CON__P04259	CON__P04259		43;167;194;723;916;997;1037;1144;1206;1377;1379;1487;1498;1499;1621;1709;1755;2137;2152;2154	448
1	1	9.8	9.8	13.741	0	10.738	1348700	4	12	12	12	12	12	12	12	12	1	#DIV/0!	CON__PSB_GFP-trap_min;CON__PSB_GFP-trap	CON__PSB_GFP-trap_min;CON__PSB_GFP-trap	;	481	459
12	3	21.5	7.4	48.105	0	38.692	2122000	6	12	12	12	12	12	12	12	12	1	#DIV/0!	CON__Q04695;CON__Q9QWL7;CON__Q9C075;CON__Q99PS0	CON__Q04695;CON__Q9QWL7	;	112;197;232;470;1029;1044;1046;1083;1221;1569;1872;2003	461
2	2	11.8	11.8	25.696	0	11.991	1898900	4	17.1321	16.8317	12	15.3213	16.7704	16.9021	12	15.2242	0.93491	0.968572	AT5G12230.1	AT5G12230.1	Symbols: MED19A | MED19A;BEST Arabidopsis thaliana protein match is: unknown protein (TAIR:AT5G19480.2);Has 1807 Blast hits to 1807 proteins in 277 species: Archae - 0;Bacteria - 0;Metazoa - 736;Fungi - 347;Plants - 385;Viruses - 0;Other Eukaryote	976;1063	344
10	7	55.8	34.8	20.35	0	50.162	52065000	25	21.2154	21.2989	21.0729	21.1957	22.0561	20.8384	20.2814	21.0586	0.909348	0.808009	AT5G38420.1;AT5G38410.1;AT5G38410.3;AT5G38410.2;AT5G38430.1	AT5G38420.1;AT5G38410.1;AT5G38410.3;AT5G38410.2;AT5G38430.1	Symbols: | Ribulose bisphosphate carboxylase (small chain) family protein | chr5:15381203-15381978 REVERSE LENGTH=181;Symbols: | Ribulose bisphosphate carboxylase (small chain) family protein | chr5:15377501-15378306 REVERSE LENGTH=181;Symbols: | Rib	393;473;483;508;863;968;969;1182;1523;2127	380
1	1	4.9	4.9	37.632	0	8.2289	264480	3	12	12.4613	12	12.1538	12	12	12	12	0.8989	0.373901	AT3G63490.1	AT3G63490.1	Symbols: | Ribosomal protein L1p/L10e family | chr3:23444269-23446020 FORWARD LENGTH=346	2031	276
1	1	10.8	10.8	12.785	0.0050378	5.9465	261050	3	12	12	12.5612	12.1871	12	12	12	12	0.878387	0.373901	AT3G55750.1;AT1G41880.1;AT1G74270.1;AT1G07070.1	AT3G55750.1;AT1G41880.1;AT1G74270.1;AT1G07070.1	Symbols: | Ribosomal protein L35Ae family protein | chr3:20698641-20699553 FORWARD LENGTH=111;Symbols: | Ribosomal protein L35Ae family protein | chr1:15651585-15652427 REVERSE LENGTH=111;Symbols: | Ribosomal protein L35Ae family protein | chr1:27928	2083	16
3	1	21.7	11.3	11.452	0	20.183	712370	6	12	12	12.9671	12.3224	12	12	12	12	0.799753	0.373901	AT2G27720.1;AT2G27720.3;AT2G27720.2	AT2G27720.1;AT2G27720.3;AT2G27720.2	Symbols: | 60S acidic ribosomal protein family | chr2:11818696-11819370 FORWARD LENGTH=115;Symbols: | 60S acidic ribosomal protein family | chr2:11818696-11819370 FORWARD LENGTH=127;Symbols: | 60S acidic ribosomal protein family | chr2:11818696-11819	287;663;2087	156
1	1	7.3	7.3	17.518	0.0074813	5.9204	317570	2	13.0902	12	12	12.3634	12	12	12	12	0.777328	0.373901	AT4G23670.1	AT4G23670.1	Symbols: | Polyketide cyclase/dehydrase and lipid transport superfamily protein | chr4:12332846-12333656 REVERSE LENGTH=151	1955	302
1	1	10	10	14.586	0	8.5635	11053000	11	12	13.1542	12	12.3847	12	12	12	12	0.765923	0.373901	AT1G79040.1	AT1G79040.1	Symbols: PSBR | photosystem II subunit R | chr1:29736085-29736781 FORWARD LENGTH=140	1775	125
1	1	0.5	0.5	193.59	0.005102	5.9723	989440	1	12	12	13.6898	12.5633	12	12	12	12	0.676771	0.373901	AT1G24460.2;AT1G24460.1	AT1G24460.2;AT1G24460.1	Symbols: | unknown protein;FUNCTIONS IN: molecular_function unknown;INVOLVED IN: biological_process unknown;LOCATED IN: cellular_component unknown;EXPRESSED IN: 22 plant structures;EXPRESSED DURING: 14 growth stages;BEST Arabidopsis thaliana protei	1710	54
3	3	11	11	33.065	0	21.841	5087400	12	18.9683	17.7167	18.6486	18.4445	17.937	17.2918	17.9789	17.7359	0.611898	0.179718	AT5G64730.1	AT5G64730.1	Symbols: | Transducin/WD40 repeat-like superfamily protein | chr5:25873146-25875021 FORWARD LENGTH=299	639;1781;1881	407
11	11	47.3	47.3	25.425	0	239.58	1817200000	93	27.3815	26.7019	27.1918	27.0917	26.0479	26.6674	26.3758	26.3637	0.603729	0.0544047	CON__P00760	CON__P00760		152;1099;1134;1189;1579;1591;1650;1651;1652;1716;1928	441
3	1	25.5	13.3	10.243	0	7.4291	857160	7	12	12	14.1914	12.7305	12	12	12	12	0.602703	0.373901	AT2G27710.4;AT2G27710.3;AT2G27710.2;AT2G27710.1	AT2G27710.4;AT2G27710.3;AT2G27710.2;AT2G27710.1	Symbols: | 60S acidic ribosomal protein family | chr2:11816929-11817670 FORWARD LENGTH=98;Symbols: | 60S acidic ribosomal protein family | chr2:11816929-11817670 FORWARD LENGTH=115;Symbols: | 60S acidic ribosomal protein family | chr2:11816929-118176	287;663;2089	155
3	2	16.2	16.2	12.834	0	25.65	58943000	10	23.9869	21.3051	21.0532	22.1151	23.2883	20.234	20.6015	21.3746	0.598544	0.611155	CON__P06328;CON__P01751;CON__P01754;CON__P06329;CON__P01757;CON__P01756;CON__P01750;CON__P01753;CON__P01748;CON__P06330;CON__P01755;CON__P03980	CON__P06328;CON__P01751;CON__P01754;CON__P06329	;;;	196;1451;1657	443
6	6	6.2	6.2	101.5	0	45.423	14228000	16	20.3938	19.8076	20.3036	20.1684	19.7214	19.1672	19.3906	19.4264	0.597925	0.0379705	AT5G23080.2;AT5G23080.1	AT5G23080.2;AT5G23080.1	Symbols: TGH | SWAP (Suppressor-of-White-APricot)/surp domain-containing protein | chr5:7743226-7748889 REVERSE LENGTH=900;Symbols: TGH | SWAP (Suppressor-of-White-APricot)/surp domain-containing protein | chr5:7743226-7748889 REVERSE LENGTH=930	431;1002;1115;1356;1549;1875	365
1	1	3.6	3.6	35.571	0	6.9238	503650	6	14.4427	12	12	12.8142	12	12	12	12	0.568713	0.373901	AT1G04410.1	AT1G04410.1	Symbols: | Lactate/malate dehydrogenase family protein | chr1:1189418-1191267 REVERSE LENGTH=332	1284	9
1	1	9.8	9.8	13.693	0.0027933	6.2313	1013900	3	12	12	14.4459	12.8153	12	12	12	12	0.568288	0.373901	AT3G47370.3;AT3G47370.2;AT3G47370.1;AT5G62300.2;AT5G62300.1;AT3G45030.1	AT3G47370.3;AT3G47370.2;AT3G47370.1;AT5G62300.2;AT5G62300.1;AT3G45030.1	Symbols: | Ribosomal protein S10p/S20e family protein | chr3:17453671-17454437 REVERSE LENGTH=122;Symbols: | Ribosomal protein S10p/S20e family protein | chr3:17453671-17454437 REVERSE LENGTH=122;Symbols: | Ribosomal protein S10p/S20e family protein	1977	248
14	14	32.2	32.2	63.026	0	97.933	15985000	41	20.5391	20.0254	19.8575	20.1407	19.6677	19.0559	19.1887	19.3041	0.559978	0.0390292	AT3G57150.1	AT3G57150.1	Symbols: NAP57, AtNAP57, CBF5, AtCBF5 | homologue of NAP57 | chr3:21154255-21155952 REVERSE LENGTH=565	52;116;315;328;983;1151;1168;1437;1560;1658;1789;1812;1861;1987	263
1	1	9.6	9.6	23.759	0	6.7024	264500	1	12	12	14.5215	12.8405	12	12	12	12	0.558453	0.373901	AT1G06680.2;AT1G06680.1	AT1G06680.2;AT1G06680.1	Symbols: PSBP-1, OEE2, PSII-P | photosystem II subunit P-1 | chr1:2048076-2049186 FORWARD LENGTH=219;Symbols: PSBP-1, OEE2, PSII-P, OE23 | photosystem II subunit P-1 | chr1:2047940-2049186 FORWARD LENGTH=263	1647	14
1	1	9.2	9.2	19.309	0	6.372	81091	1	12	12	14.6826	12.8942	12	12	12	12	0.538044	0.373901	AT3G54900.1	AT3G54900.1	Symbols: CXIP1, ATGRXCP | CAX interacting protein 1 | chr3:20341850-20342371 REVERSE LENGTH=173	271	261
1	1	4.6	4.6	28.079	0	7.6553	520960	5	12	14.7268	12	12.9089	12	12	12	12	0.532578	0.373901	AT3G62030.3;AT3G62030.1;AT3G62030.2	AT3G62030.3;AT3G62030.1;AT3G62030.2	Symbols: ROC4 | rotamase CYP 4 | chr3:22973708-22975139 FORWARD LENGTH=259;Symbols: ROC4 | rotamase CYP 4 | chr3:22973708-22975139 FORWARD LENGTH=260;Symbols: ROC4 | rotamase CYP 4 | chr3:22973004-22975139 FORWARD LENGTH=313	940	270
1	1	7.6	7.6	14.767	0	6.6858	2400400	6	12	14.7832	12	12.9277	12	12	12	12	0.525689	0.373901	AT1G67430.2;AT1G67430.1;AT1G27400.1	AT1G67430.2;AT1G67430.1;AT1G27400.1	Symbols: | Ribosomal protein L22p/L17e family protein | chr1:25262209-25263627 FORWARD LENGTH=131;Symbols: | Ribosomal protein L22p/L17e family protein | chr1:25262209-25263627 FORWARD LENGTH=175;Symbols: | Ribosomal protein L22p/L17e family protein	1589	57
31	31	29.7	29.7	133.03	0	253.29	83464000	137	23.039	22.5839	22.467	22.6966	22.0641	21.5941	21.6023	21.7535	0.520101	0.015636	AT1G20920.1;AT1G20920.2;AT3G09620.1	AT1G20920.1;AT1G20920.2	Symbols: | P-loop containing nucleoside triphosphate hydrolases superfamily protein | chr1:7285342-7288842 FORWARD LENGTH=1166;Symbols: | P-loop containing nucleoside triphosphate hydrolases superfamily protein | chr1:7286356-7288842 FORWARD LENGTH=828	2;105;114;282;441;458;499;731;885;955;995;1015;1145;1178;1229;1289;1297;1332;1333;1361;1515;1571;1576;1600;1605;1822;1870;1871;2051;2052;2187	49
4	4	12.9	12.9	34.451	0	31.105	30393000	25	21.4218	21.388	21.2383	21.3493	19.8151	21.0096	20.3001	20.3749	0.508942	0.0501852	AT3G29075.1	AT3G29075.1	Symbols: | glycine-rich protein | chr3:11051645-11052629 REVERSE LENGTH=294	1454;1459;1782;1783	244
49	38	70	58.4	91.847	0	323.31	555190000	348	25.3985	25.4144	25.3237	25.3789	24.188	24.887	24.1357	24.4036	0.508625	0.0161241	AT3G15730.1;AT5G25370.1	AT3G15730.1	Symbols: PLDALPHA1, PLD | phospholipase D alpha 1 | chr3:5330835-5333474 FORWARD LENGTH=810	159;160;161;226;243;261;272;274;296;316;336;548;553;608;633;714;721;913;948;962;1074;1198;1199;1202;1312;1325;1399;1444;1452;1453;1479;1540;1559;1599;1637;1638;1642;1643;1818;1837;1838;1878;1879;2019;2020;2021;2068;2151;2184	232
9	9	37.7	37.7	19.087	0	129.44	69823000	45	22.6714	22.3418	22.3742	22.4625	21.7641	20.901	21.6002	21.4218	0.486102	0.0216617	AT1G79200.1	AT1G79200.1	Symbols: | unknown protein;Has 30201 Blast hits to 17322 proteins in 780 species: Archae - 12;Bacteria - 1396;Metazoa - 17338;Fungi - 3422;Plants - 5037;Viruses - 0;Other Eukaryotes - 2996 (source: NCBI BLink). | chr1:29794404-29795711 FORWARD LEN	378;1130;1396;1397;1566;1760;1761;1905;2199	126
1	1	1.9	1.9	44.552	0.0074442	5.9021	187330	1	15.3099	12	12	13.1033	12	12	12	12	0.465454	0.373901	CON__P07339	CON__P07339		1968	451
1	1	2.7	2.7	44.444	0.0093458	5.8165	1455200	2	12	15.3905	12	13.1302	12	12	12	12	0.456862	0.373901	AT1G11860.3;AT1G11860.2;AT1G11860.1	AT1G11860.3;AT1G11860.2;AT1G11860.1	Symbols: | Glycine cleavage T-protein family | chr1:4001801-4003245 FORWARD LENGTH=408;Symbols: | Glycine cleavage T-protein family | chr1:4001801-4003245 FORWARD LENGTH=408;Symbols: | Glycine cleavage T-protein family | chr1:4001801-4003245 FORWARD	622	29
2	2	6.6	6.6	35.17	0	12.829	5486200	11	19.1136	19.2315	18.932	19.0924	17.9675	17.725	18.0543	17.9156	0.442336	0.000862729	AT5G64200.2;AT5G64200.1	AT5G64200.2;AT5G64200.1	Symbols: ATSC35, SC35, At-SC35 | ortholog of human splicing factor SC35 | chr5:25681849-25683553 REVERSE LENGTH=303;Symbols: ATSC35, SC35, At-SC35 | ortholog of human splicing factor SC35 | chr5:25681849-25683553 REVERSE LENGTH=303	1880;2101	406
24	24	83	83	35.704	0	323.31	12202000000	453	30.2505	29.9905	30.4321	30.2244	28.5969	29.3649	29.125	29.0289	0.436662	0.010119	CON__P01868;CON__P01869;CON__P01859	CON__P01868;CON__P01869	;	154;155;240;257;262;286;337;364;718;1425;1426;1447;1456;1461;1690;1743;1744;1888;1935;2033;2034;2035;2072;2073	445
1	1	6.9	6.9	14.628	0	7.4661	3719100	2	12	12	15.5892	13.1964	12	12	12	12	0.436365	0.373901	AT3G56340.1;AT2G40590.1;AT2G40510.1	AT3G56340.1;AT2G40590.1;AT2G40510.1	Symbols: | Ribosomal protein S26e family protein | chr3:20892309-20893343 REVERSE LENGTH=130;Symbols: | Ribosomal protein S26e family protein | chr2:16945215-16946345 REVERSE LENGTH=131;Symbols: | Ribosomal protein S26e family protein | chr2:16918506	1372	183
1	1	6.7	6.7	16.282	0	6.6153	1115500	8	12	15.6458	12	13.2153	12	12	12	12	0.430691	0.373901	AT1G79850.1	AT1G79850.1	Symbols: RPS17, CS17, PRPS17 | ribosomal protein S17 | chr1:30041473-30041922 REVERSE LENGTH=149	1617	127
1	1	0.5	0.5	248.07	0.0026385	6.0901	272350	1	12	15.7295	12	13.2432	12	12	12	12	0.42244	0.373901	CON__Q5D862	CON__Q5D862		564	462
3	2	6.1	4.8	60.567	0	12.621	967360	2	12	12	15.735	13.245	12	12	12	12	0.421905	0.373901	AT4G36690.2;AT4G36690.4;AT4G36690.3;AT4G36690.1	AT4G36690.2;AT4G36690.4;AT4G36690.3;AT4G36690.1	Symbols: ATU2AF65A | U2 snRNP auxilliary factor, large subunit, splicing factor | chr4:17294591-17297609 REVERSE LENGTH=542;Symbols: ATU2AF65A | U2 snRNP auxilliary factor, large subunit, splicing factor | chr4:17294139-17297609 REVERSE LENGTH=551;Symbo	435;489;837	324
1	1	5.8	5.8	18.429	0.0098039	5.8825	3485600	3	12	12	15.7769	13.259	12	12	12	12	0.417841	0.373901	AT5G64040.1;AT5G64040.2	AT5G64040.1;AT5G64040.2	Symbols: PSAN | photosystem I reaction center subunit PSI-N, chloroplast, putative / PSI-N, putative (PSAN) | chr5:25628724-25629409 REVERSE LENGTH=171;Symbols: PSAN | photosystem I reaction center subunit PSI-N, chloroplast, putative / PSI-N, putative (	1048	405
15	4	22.4	7.6	62.378	0	46.613	12515000	18	19.9145	20.8259	19.34	20.0268	19.3069	18.0719	18.902	18.7603	0.415661	0.0884737	CON__P13647	CON__P13647		166;917;997;1037;1144;1201;1377;1379;1487;1498;1499;2067;2137;2152;2153	455
29	28	57.8	57.8	62.129	0	323.31	238490000	125	23.8137	25.2469	23.8558	24.3055	23.6716	22.2763	23.1614	23.0364	0.414943	0.111247	CON__P35527	CON__P35527		403;567;624;635;636;780;781;874;904;1044;1045;1081;1329;1445;1468;1471;1477;1481;1520;1521;1522;1596;1597;1626;1732;1823;1827;2050;2143	457
1	1	2.8	2.8	59.002	0.0026247	6.0854	577650	3	12	12	15.871	13.2903	12	12	12	12	0.40886	0.373901	AT3G05060.1	AT3G05060.1	Symbols: | NOP56-like pre RNA processing ribonucleoprotein | chr3:1413174-1415564 REVERSE LENGTH=533	1013	201
2	2	25.5	25.5	10.796	0	16.318	39748000	19	21.2148	22.0035	22.2484	21.8222	19.8564	20.7858	20.8569	20.4997	0.399832	0.0420055	AT1G54410.1	AT1G54410.1	Symbols: | dehydrin family protein | chr1:20310305-20310601 REVERSE LENGTH=98	840;1620	94
1	1	7.7	7.7	15.735	0	11.074	1767800	6	12	12	16.0469	13.349	12	12	12	12	0.392572	0.373901	AT5G02960.1;AT3G09680.1	AT5G02960.1;AT3G09680.1	Symbols: | Ribosomal protein S12/S23 family protein | chr5:693280-694396 REVERSE LENGTH=142;Symbols: | Ribosomal protein S12/S23 family protein | chr3:2969197-2970291 REVERSE LENGTH=142	2065	217
17	17	97.2	97.2	11.778	0	323.31	5067700000	212	28.6537	28.4271	28.928	28.6696	26.9671	27.3697	27.5104	27.2824	0.382305	0.00312069	CON__P01837	CON__P01837		29;30;268;269;278;324;325;326;796;797;819;1495;1496;1497;1876;1877;2128	444
1	1	5	5	19.949	0	7.9118	2349700	9	12	12	16.2519	13.4173	12	12	12	12	0.37441	0.373901	AT2G41475.1	AT2G41475.1	Symbols: | Embryo-specific protein 3, (ATS3) | chr2:17295259-17296329 REVERSE LENGTH=179	331	184
35	24	49.6	37.8	65.886	0	323.31	337660000	190	24.4159	25.7176	24.5083	24.8806	23.912	22.7775	23.6849	23.4581	0.373058	0.0591216	CON__P04264;CON__Q6IFZ6;CON__Q9R0H5	CON__P04264		48;332;343;536;565;623;826;967;1036;1068;1170;1171;1207;1208;1324;1374;1375;1377;1391;1420;1484;1624;1646;1654;1655;1664;1676;1677;1684;1793;1794;1824;1842;1843;2152	449
1	1	14	14	9.3472	0.0092379	5.7981	563850	1	12	12	16.2724	13.4241	12	12	12	12	0.372645	0.373901	AT4G15802.1	AT4G15802.1	Symbols: HSBP, AtHSBP | heat shock factor binding protein | chr4:8986864-8988339 REVERSE LENGTH=86	890	290
6	1	8.5	1.3	104.45	0.0093897	5.8196	1528300	1	12	12	16.3419	13.4473	12	12	12	12	0.366706	0.373901	AT5G57350.2;AT5G57350.1	AT5G57350.2;AT5G57350.1	Symbols: HA3 | H(+)-ATPase 3 | chr5:23231208-23236381 REVERSE LENGTH=949;Symbols: AHA3, ATAHA3, HA3 | H(+)-ATPase 3 | chr5:23231208-23236381 REVERSE LENGTH=949	12;953;1097;1191;1203;1948	398
1	1	0.3	0.3	331.77	0	6.657	141980	1	12	16.4295	12	13.4765	12	12	12	12	0.359361	0.373901	CON__P15924	CON__P15924		1406	456
4	1	9	2.3	42.93	0.0028169	6.2731	1176600	1	12	16.4626	12	13.4875	12	12	12	12	0.356618	0.373901	AT2G21330.1;AT2G21330.3;AT2G21330.2;AT2G01140.1	AT2G21330.1;AT2G21330.3	Symbols: FBA1 | fructose-bisphosphate aldolase 1 | chr2:9128416-9130152 REVERSE LENGTH=399;Symbols: FBA1 | fructose-bisphosphate aldolase 1 | chr2:9128416-9130152 REVERSE LENGTH=389	18;133;149;1757	148
1	1	24.3	24.3	4.4604	0.0028409	6.2985	2178500	2	12	12	16.6102	13.5367	12	12	12	12	0.344664	0.373901	ATCG00760.1	ATCG00760.1	Symbols: RPL36 | ribosomal protein L36 | chrC:79489-79602 REVERSE LENGTH=37	871	433
30	22	55.8	48.1	59.518	0	323.31	167930000	142	24.0246	24.4992	23.5581	24.0273	22.4385	21.9327	23.0172	22.4628	0.338089	0.0195588	CON__P13645;CON__P02535;CON__Q148H6;CON__Q7Z3Y7;CON__P05784;CON__Q7Z3Z0;CON__Q7Z3Y8;CON__Q99456;CON__Q2M2I5;CON__Q14525;CON__P02534;CON__Q61765;CON__Q15323;CON__Q92764;CON__Q14532;CON__O76014;CON__Q497I4;CON__O76015;CON__O76013;CON__Q7Z3Y9	CON__P13645		37;38;51;113;244;440;724;873;909;1029;1044;1046;1082;1135;1366;1407;1432;1434;1506;1510;1511;1570;1601;1625;1672;1707;1708;2004;2080;2144	454
1	1	1.4	1.4	62.945	0.0096154	5.8533	448590	1	12	16.7685	12	13.5895	12	12	12	12	0.332287	0.373901	AT4G19570.1	AT4G19570.1	Symbols: | Chaperone DnaJ-domain superfamily protein | chr4:10665516-10667192 FORWARD LENGTH=558	1007	298
1	1	7.1	7.1	16.163	0	9.1992	1110400	6	12	12	16.7796	13.5932	12	12	12	12	0.331438	0.373901	AT1G13930.3;AT1G13930.2;AT1G13930.1	AT1G13930.3;AT1G13930.2;AT1G13930.1	Symbols: | Involved in response to salt stress. Knockout mutants are hypersensitive to salt stress. | chr1:4761091-4761558 FORWARD LENGTH=155;Symbols: | Involved in response to salt stress. Knockout mutants are hypersensitive to salt stress. | chr1:4	2090	34
2	2	7.7	7.7	31.967	0	11.524	1015300	3	12	12	16.7858	13.5953	12	12	12	12	0.330958	0.373901	AT1G02840.2;AT1G02840.3;AT1G02840.1;AT3G49430.2;AT3G49430.3;AT3G49430.1	AT1G02840.2;AT1G02840.3;AT1G02840.1;AT3G49430.2;AT3G49430.3;AT3G49430.1	Symbols: SR1, ATSRP34, SRP34, SR34, At-SR34 | RNA-binding (RRM/RBD/RNP motifs) family protein | chr1:626918-628995 FORWARD LENGTH=285;Symbols: SR1, ATSRP34, SRP34, SR34, At-SR34 | RNA-binding (RRM/RBD/RNP motifs) family protein | chr1:626918-629583 FORWA	1212;1903	6
1	1	1.8	1.8	82.627	0.0050891	5.9617	1009500	1	12	12	16.8263	13.6088	12	12	12	12	0.327882	0.373901	AT4G32420.2;AT4G32420.3;AT4G32420.1	AT4G32420.2;AT4G32420.3;AT4G32420.1	Symbols: | Cyclophilin-like peptidyl-prolyl cis-trans isomerase family protein | chr4:15647550-15650678 REVERSE LENGTH=727;Symbols: | Cyclophilin-like peptidyl-prolyl cis-trans isomerase family protein | chr4:15647550-15652103 REVERSE LENGTH=837;Symbo	1965	318
1	1	2.5	2.5	48.553	0.0026455	6.0901	124830	0	16.9296	12	12	13.6432	12	12	12	12	0.320145	0.373901	AT3G44540.2;AT3G44540.1	AT3G44540.2;AT3G44540.1	Symbols: FAR4 | fatty acid reductase 4 | chr3:16124079-16127644 FORWARD LENGTH=433;Symbols: FAR4 | fatty acid reductase 4 | chr3:16124079-16127769 FORWARD LENGTH=493	319	247
31	19	54.1	39.5	65.865	0	323.31	64614000	81	21.8933	23.4558	22.3546	22.5679	21.5757	19.8945	21.2859	20.9187	0.31882	0.0767854	CON__P35908;CON__Q01546;CON__Q5XKE5;CON__Q6NXH9;CON__P19013	CON__P35908		167;333;344;406;518;536;618;634;726;777;826;997;1023;1037;1144;1187;1188;1376;1379;1433;1645;1659;1660;1683;1734;1753;1754;1936;1937;2152;2171	458
1	1	2.2	2.2	80.059	0.0097324	5.8659	1069800	1	12	12	17.0311	13.677	12	12	12	12	0.312724	0.373901	AT3G42060.1	AT3G42060.1	Symbols: | myosin heavy chain-related | chr3:14251600-14254269 REVERSE LENGTH=712	1450	245
3	3	3.3	3.3	105.64	0	16.652	953610	3	12	17.0794	12	13.6931	12	12	12	12	0.309253	0.373901	AT1G44910.2;AT1G44910.1	AT1G44910.2;AT1G44910.1	Symbols: ATPRP40A, PRP40A | pre-mRNA-processing protein 40A | chr1:16975930-16982647 FORWARD LENGTH=926;Symbols: ATPRP40A, PRP40A | pre-mRNA-processing protein 40A | chr1:16975930-16982818 FORWARD LENGTH=958	291;1127;1492	82
1	1	16.1	16.1	6.887	0	9.4144	3016200	9	12	17.1275	12	13.7092	12	12	12	12	0.305839	0.373901	AT5G56670.1;AT4G29390.1;AT2G19750.1	AT5G56670.1;AT4G29390.1;AT2G19750.1	Symbols: | Ribosomal protein S30 family protein | chr5:22935413-22935981 REVERSE LENGTH=62;Symbols: | Ribosomal protein S30 family protein | chr4:14465212-14465902 REVERSE LENGTH=62;Symbols: | Ribosomal protein S30 family protein | chr2:8515037-85158	584	144
1	1	7	7	21.472	0	6.7844	2563100	1	12	12	17.3677	13.7892	12	12	12	12	0.289327	0.373901	AT3G59800.1	AT3G59800.1	Symbols: | unknown protein;BEST Arabidopsis thaliana protein match is: unknown protein (TAIR:AT2G43795.2);Has 15361 Blast hits to 8061 proteins in 537 species: Archae - 2;Bacteria - 622;Metazoa - 7561;Fungi - 1246;Plants - 920;Viruses - 49;Other	977	265
1	1	1.7	1.7	282.39	0.0027548	6.2003	2510600	2	12	12	17.3962	13.7987	12	12	12	12	0.28743	0.373901	CON__Q86YZ3	CON__Q86YZ3		711	464
20	1	35.8	1.8	60.044	0	109.34	869400	2	12	17.4506	12	13.8169	12	12	12	12	0.283839	0.373901	CON__P02538;CON__O95678;CON__Q8VED5	CON__P02538		43;92;167;723;916;997;1037;1144;1206;1377;1379;1487;1498;1499;1622;1709;1755;2137;2152;2154	447
1	1	14.4	14.4	16.984	0	8.8063	2252700	4	12	17.675	12	13.8917	12	12	12	12	0.269495	0.373901	AT1G20340.1	AT1G20340.1	Symbols: DRT112, PETE2 | Cupredoxin superfamily protein | chr1:7042770-7043273 REVERSE LENGTH=167	1395	47
1	1	3.7	3.7	44.648	0.002584	6.0406	861710	1	12	12	17.685	13.895	12	12	12	12	0.268876	0.373901	AT1G16610.2;AT1G16610.1;AT1G16610.3	AT1G16610.2;AT1G16610.1;AT1G16610.3	Symbols: SR45, RNPS1 | arginine/serine-rich 45 | chr1:5675925-5678686 REVERSE LENGTH=407;Symbols: SR45, RNPS1 | arginine/serine-rich 45 | chr1:5675925-5678686 REVERSE LENGTH=414;Symbols: SR45 | arginine/serine-rich 45 | chr1:5675925-5678686 REVERSE LENG	217	41
2	2	7	7	29.749	0	11.351	1406500	3	12	17.7649	12	13.9216	12	12	12	12	0.263957	0.373901	AT3G15356.1;AT3G16530.1;AT1G53080.1	AT3G15356.1;AT3G16530.1;AT1G53080.1	Symbols: | Legume lectin family protein | chr3:5174603-5175418 REVERSE LENGTH=271;Symbols: | Legume lectin family protein | chr3:5624586-5625416 REVERSE LENGTH=276;Symbols: | Legume lectin family protein | chr1:19781368-19782219 FORWARD LENGTH=283	340;1873	231
1	1	2.3	2.3	34.836	0.0094787	5.837	21729000	4	12	12	17.7801	13.9267	12	12	12	12	0.263028	0.373901	AT5G03100.1	AT5G03100.1	Symbols: | F-box/RNI-like superfamily protein | chr5:726832-727980 FORWARD LENGTH=307	1079	332
1	1	16.8	16.8	11.462	0	9.2533	2195800	2	12	17.9141	12	13.9714	12	12	12	12	0.255012	0.373901	CON__P04943;CON__P04942;CON__P04940	CON__P04943;CON__P04942;CON__P04940	;;	1485	450
13	13	11	11	181.98	0	102.29	7240200	20	19.2673	20.7255	19.2212	19.738	17.6579	17.5989	17.934	17.7302	0.248659	0.0164177	AT5G41790.1	AT5G41790.1	Symbols: CIP1 | COP1-interactive protein 1 | chr5:16727530-16732391 FORWARD LENGTH=1586	425;426;807;808;882;914;1216;1428;1580;1603;1680;1891;2100	381
1	1	2.7	2.7	30.465	0.0098522	5.8879	2008000	3	12	18.1485	12	14.0495	12	12	12	12	0.241566	0.373901	AT1G59800.1	AT1G59800.1	Symbols: | Cullin family protein | chr1:22004964-22006172 FORWARD LENGTH=255	1920	101
4	4	10.6	10.6	42.249	0	27.588	3353800	10	18.9047	17.7855	19.5932	18.7611	16.0717	17.0758	16.9488	16.6988	0.239423	0.0283445	AT3G63400.2;AT3G63400.3;AT3G63400.1	AT3G63400.2;AT3G63400.3;AT3G63400.1	Symbols: | Cyclophilin-like peptidyl-prolyl cis-trans isomerase family protein | chr3:23412449-23415435 FORWARD LENGTH=387;Symbols: | Cyclophilin-like peptidyl-prolyl cis-trans isomerase family protein | chr3:23412449-23415435 FORWARD LENGTH=570;Symbo	109;560;861;938	274
1	1	1.8	1.8	52.42	0.0092807	5.8052	1578500	2	12	12	18.1877	14.0626	12	12	12	12	0.239392	0.373901	AT5G02700.1	AT5G02700.1	Symbols: | F-box/RNI-like superfamily protein | chr5:609381-611679 REVERSE LENGTH=456	1065	331
9	9	17.8	17.8	58.773	0	58.302	19284000	29	21.3767	20.9729	21.5991	21.3162	18.9341	18.445	20.2702	19.2164	0.233288	0.0217935	AT1G48920.1	AT1G48920.1	Symbols: ATNUC-L1, PARL1, NUC-L1 | nucleolin like 1 | chr1:18098186-18101422 FORWARD LENGTH=557	45;46;391;607;610;613;1064;1714;1819	86
1	1	1.7	1.7	65.795	0.002681	6.1232	2345000	3	12	12	18.4896	14.1632	12	12	12	12	0.223261	0.373901	AT3G06350.1	AT3G06350.1	Symbols: EMB3004, MEE32 | dehydroquinate dehydratase, putative / shikimate dehydrogenase, putative | chr3:1924536-1927701 REVERSE LENGTH=603	906	206
1	1	1.6	1.6	48.931	0	6.486	4526800	6	12	12	18.7648	14.2549	12	12	12	12	0.209506	0.373901	AT5G66470.1	AT5G66470.1	Symbols: | RNA binding;GTP binding | chr5:26541986-26544302 REVERSE LENGTH=427	996	410
1	1	5.7	5.7	16.036	0.0095923	5.8486	3210400	4	12	18.7837	12	14.2612	12	12	12	12	0.208592	0.373901	AT3G10610.1;AT2G05220.2;AT2G05220.1;AT5G04800.4;AT5G04800.3;AT5G04800.2;AT5G04800.1;AT2G04390.1	AT3G10610.1;AT2G05220.2;AT2G05220.1;AT5G04800.4;AT5G04800.3;AT5G04800.2;AT5G04800.1;AT2G04390.1	Symbols: | Ribosomal S17 family protein | chr3:3319459-3319881 FORWARD LENGTH=140;Symbols: | Ribosomal S17 family protein | chr2:1894757-1895179 REVERSE LENGTH=140;Symbols: | Ribosomal S17 family protein | chr2:1894757-1895179 REVERSE LENGTH=140;Sym	1548	135
1	1	1.8	1.8	56.682	0	8.1616	1582300	2	18.8292	12	12	14.2764	12	12	12	12	0.206411	0.373901	CON__Q9NSB4	CON__Q9NSB4		495	465
1	1	4	4	26.558	0	14.732	5492300	7	12	12	18.9561	14.3187	12	12	12	12	0.20045	0.373901	CON__P07477	CON__P07477		1829	452
4	1	26.6	9.7	14.047	0	15.605	3225600	6	12	12	19.1375	14.3792	12	12	12	12	0.192222	0.373901	AT5G27770.1	AT5G27770.1	Symbols: | Ribosomal L22e protein family | chr5:9836166-9837113 FORWARD LENGTH=124	69;888;932;933	372
2	1	7.7	7.7	13.016	0	8.5914	2726200	3	12	12	19.2467	14.4156	12	12	12	12	0.18743	0.373901	CON__P01749	CON__P01749		196;283	442
4	1	26.6	9.7	14.018	0	52.371	9804300	9	12	12	19.3219	14.4406	12	12	12	12	0.184203	0.373901	AT3G05560.3;AT3G05560.2;AT3G05560.1	AT3G05560.3;AT3G05560.2;AT3G05560.1	Symbols: | Ribosomal L22e protein family | chr3:1614641-1615204 FORWARD LENGTH=124;Symbols: | Ribosomal L22e protein family | chr3:1614641-1615204 FORWARD LENGTH=124;Symbols: | Ribosomal L22e protein family | chr3:1614641-1615204 FORWARD LENGTH=124	70;888;932;933	202
1	1	1.7	1.7	46.017	0.0097087	5.86	1020300	1	12	12	19.5176	14.5059	12	12	12	12	0.176061	0.373901	AT4G32540.1	AT4G32540.1	Symbols: YUC, YUC1 | Flavin-binding monooxygenase family protein | chr4:15700904-15702870 FORWARD LENGTH=414	1791	319
1	1	0.8	0.8	249.38	0.009324	5.8081	10717000	2	12	12	20.1805	14.7268	12	12	12	12	0.151058	0.373901	AT4G00450.1	AT4G00450.1	Symbols: CRP, CCT | RNA polymerase II transcription mediators | chr4:202425-210666 FORWARD LENGTH=2253	267	278
1	1	3.4	3.4	29.481	0.009901	5.8917	11146000	1	12	12	20.3815	14.7938	12	12	12	12	0.144201	0.373901	AT5G46860.1	AT5G46860.1	Symbols: VAM3, ATVAM3, SYP22, ATSYP22, SGR3 | Syntaxin/t-SNARE family protein | chr5:19012342-19013795 REVERSE LENGTH=268	1615	390
1	1	3.9	3.9	50.636	0.00978	5.8715	6019200	1	12	12	20.6292	14.8764	12	12	12	12	0.136182	0.373901	AT1G14580.2;AT1G14580.1	AT1G14580.2;AT1G14580.1	Symbols: | C2H2-like zinc finger protein | chr1:4990070-4992442 FORWARD LENGTH=467;Symbols: | C2H2-like zinc finger protein | chr1:4990070-4992442 FORWARD LENGTH=467	1410	36
1	1	1	1	188.19	0.0095694	5.8453	9282400	1	12	12	20.8539	14.9513	12	12	12	12	0.129291	0.373901	AT3G12980.1	AT3G12980.1	Symbols: HAC5, ATHPCAT4 | histone acetyltransferase of the CBP family 5 | chr3:4146919-4154495 FORWARD LENGTH=1670	1509	225
1	1	3.4	3.4	64.41	0.0026316	6.0874	12272000	3	12	12	20.9083	14.9694	12	12	12	12	0.127677	0.373901	AT5G50420.1	AT5G50420.1	Symbols: | O-fucosyltransferase family protein | chr5:20530453-20532635 REVERSE LENGTH=566	1421	392
1	1	7.7	7.7	39.234	0.0051151	5.9798	23580000	1	12	22.091	12	15.3637	12	12	12	12	0.097149	0.373901	AT4G10500.1	AT4G10500.1	Symbols: | 2-oxoglutarate (2OG) and Fe(II)-dependent oxygenase superfamily protein | chr4:6491089-6492342 FORWARD LENGTH=349	1368	287
3	1	5.2	1.7	61.802	0	19.64	46551000	7	12	12	22.2541	15.418	12	12	12	12	0.0935548	0.373901	CON__Q7Z794	CON__Q7Z794		536;2152;2186	463
1	1	1.3	1.3	100.19	0.0026042	6.0774	45356000	1	12	12	22.8335	15.6112	12	12	12	12	0.0818325	0.373901	AT5G45470.1	AT5G45470.1	Symbols: | Protein of unknown function (DUF594) | chr5:18422164-18424764 REVERSE LENGTH=866	376	385
2	2	11.4	11.4	20.786	0	11.976	1041200	3	17.3842	17.4665	12	15.6169	12	12	12	12	0.0815082	0.116139	AT1G76180.2;AT1G76180.1;AT1G20440.1	AT1G76180.2;AT1G76180.1;AT1G20440.1	Symbols: ERD14 | Dehydrin family protein | chr1:28587013-28587657 REVERSE LENGTH=185;Symbols: ERD14 | Dehydrin family protein | chr1:28587013-28587657 REVERSE LENGTH=185;Symbols: COR47, RD17, AtCOR47 | cold-regulated 47 | chr1:7084722-7085664 REVERSE LE	677;1923	122
2	2	8.4	8.4	27.54	0	12.879	1557000	4	17.7444	17.9323	17.6966	17.7911	16.4321	12	12	13.4774	0.0502859	0.0433992	AT3G52220.1	AT3G52220.1	Symbols: | CONTAINS InterPro DOMAIN/s: Kinase phosphorylation domain (InterPro:IPR019315);Has 8882 Blast hits to 4920 proteins in 346 species: Archae - 10;Bacteria - 184;Metazoa - 3955;Fungi - 1221;Plants - 712;Viruses - 24;Other Eukaryotes - 2776	1179;1893	256
4	4	5	5	97.081	0	32.161	4731600	11	19.0496	18.4253	17.9046	18.4598	18.1621	12	12	14.054	0.0471759	0.101613	AT1G70620.2;AT1G70620.1;AT1G70620.3	AT1G70620.2;AT1G70620.1;AT1G70620.3	Symbols: | cyclin-related | chr1:26626634-26630307 FORWARD LENGTH=884;Symbols: | cyclin-related | chr1:26626634-26630755 FORWARD LENGTH=897;Symbols: | cyclin-related | chr1:26626634-26630777 FORWARD LENGTH=957	883;886;1067;2076	115
4	4	5.1	5.1	108.79	0	24.567	5493900	6	18.8665	18.8004	12	16.5556	12	12	12	12	0.042522	0.116126	AT3G23900.3;AT3G23900.1;AT3G23900.2	AT3G23900.3;AT3G23900.1;AT3G23900.2	Symbols: | RNA recognition motif (RRM)-containing protein | chr3:8631941-8635852 REVERSE LENGTH=987;Symbols: | RNA recognition motif (RRM)-containing protein | chr3:8631941-8635852 REVERSE LENGTH=987;Symbols: | RNA recognition motif (RRM)-containing	130;600;1380;1590	237
2	2	3.2	3.2	94.141	0	32.511	2493400	7	18.905	18.5024	18.5483	18.6519	12	17.933	12	13.9777	0.0391665	0.0777773	AT5G16780.1	AT5G16780.1	Symbols: DOT2, MDF | SART-1 family | chr5:5517784-5521566 REVERSE LENGTH=820	354;687	354
4	3	9.8	8.7	66.315	0	31.247	4609200	12	18.7111	18.7876	18.5752	18.6913	12	12	17.5635	13.8545	0.034993	0.0596269	AT1G60900.1;AT1G60830.1	AT1G60900.1	Symbols: | U2 snRNP auxilliary factor, large subunit, splicing factor | chr1:22424008-22427806 FORWARD LENGTH=589	489;838;1741;1956	102
1	1	7.9	7.9	38.479	0.0026667	6.1139	701250000	1	12	12	27.1263	17.0421	12	12	12	12	0.0303511	0.373901	AT4G27780.1	AT4G27780.1	Symbols: ACBP2 | acyl-CoA binding protein 2 | chr4:13847774-13849629 FORWARD LENGTH=354	2027	311
2	2	0.8	0.8	269.56	0	11.663	395180000	5	26.2981	24.8431	12	21.0471	22.3696	12	12	15.4565	0.0207528	0.38286	ATCG01280.1;ATCG00860.1	ATCG01280.1;ATCG00860.1	Symbols: YCF2.2 | Chloroplast Ycf2;ATPase, AAA type, core | chrC:145291-152175 REVERSE LENGTH=2294;Symbols: YCF2.1 | Chloroplast Ycf2;ATPase, AAA type, core | chrC:86474-93358 FORWARD LENGTH=2294	2134;2135	438

## Sheet: peptide IDs
Sequence	Proteins	id
AAAEELLEK	AT5G30510.1	0
AAALNIVPTSTGAAK	AT1G42970.1;AT1G12900.4;AT1G12900.3;AT1G12900.1;AT1G12900.2;AT3G26650.1	1
AAAMVAAMNLQHNLAK	AT1G20920.1;AT1G20920.2	2
AAANAPIIMK	AT3G11130.1	3
AAANAPITMK	AT3G08530.1	4
AAEDPEFETFYTK	ATCG00270.1	5
AAEIFSNK	AT5G35630.3;AT5G35630.2;AT5G35630.1	6
AAEIFSNKK	AT5G35630.3;AT5G35630.2;AT5G35630.1	7
AAETVKPVPPR	AT5G07220.1	8
AAGATWIQLDEPVLVMDLEGQK	AT5G17920.2;AT5G17920.1	9
AAGMALAQHPVVNASCK	AT3G25860.1	10
AAGVILQMIR	AT5G67630.1	11
AAHLVDSTNQVGHFQK	AT4G30190.1;AT4G30190.2;AT5G57350.2;AT5G57350.1;AT2G18960.1	12
AAIPTIK	AT3G12780.1;AT1G56190.2;AT1G56190.1	13
AALDLIFEEGLENIIAR	AT2G13360.2;AT2G13360.1	14
AALQAGIDKLADCVGLTLGPR	AT2G28000.1	15
AALQYLESLK	AT5G45620.2;AT5G45620.1	16
AAMLQGVSEVAEAVK	AT3G13860.1	17
AAQDILLAR	AT2G21330.1;AT2G21330.3	18
AASAAGTIMTLSSWATSSVEEVASTGPGIR	AT3G14415.3;AT3G14415.1;AT3G14415.2	19
AASFNIIPSSTGAAK	AT1G13440.1;AT1G13440.2;AT3G04120.1	20
AASYAAYVTGVSCAK	AT1G32230.1;AT1G32230.2;AT1G32230.3	21
AATIIQAR	AT5G20490.2;AT5G20490.1	22
AATYDEIK	AT1G13440.1;AT1G13440.2;AT3G04120.1	23
AATYDEIKK	AT1G13440.1;AT1G13440.2;AT3G04120.1	24
AAVEEGILPGGGVALLYAAR	AT3G23990.1	25
AAVEEGIVPGGGVALLYASK	AT2G33210.2;AT2G33210.1	26
ACTVEVVEDVYGAIDHIHR	AT2G39800.2;AT2G39800.3;AT2G39800.4;AT2G39800.1	27
ACYGVLR	AT2G31610.1;AT5G35530.1	28
ADAAPTVSIFPPSSEQLTSGGASVVCFLNNFYPK	CON__P01837	29
ADAAPTVSIFPPSSEQLTSGGASVVCFLNNFYPKDINVK	CON__P01837	30
ADAVGVTVDGLFNK	AT3G46780.1	31
ADDATHFLEVIR	AT3G08530.1	33
ADEISNIIR	ATCG00120.1	34
ADENTPNHVPDMASMGM	AT3G13860.1	35
ADGGLWLLVR	AT5G23120.1	36
ADLEMQIESLTEELAYLK	CON__P13645	37
ADLEMQIESLTEELAYLKK	CON__P13645	38
ADLNVPLDDNQTITDDTR	AT3G12780.1	39
ADMNGWASQFPSER	AT5G56140.1;AT4G26480.1	40
ADRDESSPYAAMLAAQDVAQR	AT2G36160.1;AT3G52580.1;AT3G11510.1	41
ADSSPDSCFK	AT1G34190.1	42
ADTLTDEINFLR	CON__P02538;CON__P04259	43
ADTPIDANEIR	AT1G76010.1	44
ADVENFFK	AT1G48920.1	45
ADVENFFKEAGEVVDVR	AT1G48920.1	46
ADVETQGQKSLNAFYVR	AT5G25320.1	47
AEAESLYQSK	CON__P04264	48
AEATDVANAVLDGSDAILLGAETLR	AT3G52990.2;AT3G52990.1;AT2G36580.1	49
AEGLGLTLSSLEK	AT1G74730.1	50
AETECQNTEYQQLLDIK	CON__P13645	51
AEVDISHSK	AT3G57150.1	52
AEVKFEGDTLVNR	CON__PSB_N_GS_green;CON__PSB_N_GS_yellow;CON__PSB_C_GS_green;CON__PSB_N_GFP;CON__PSB_C_GFP;CON__PSB_C_GS_yellow;CON__P42212;CON__Q9U6Y5	53
AEVKFEGDTLVNRIELK	CON__PSB_N_GS_green;CON__PSB_N_GS_yellow;CON__PSB_C_GS_green;CON__PSB_N_GFP;CON__PSB_C_GFP;CON__PSB_C_GS_yellow;CON__P42212;CON__Q9U6Y5	54
AEVSAIQAK	AT5G50920.1	56
AEYDEAGPGIVHR	AT3G18780.2;AT1G49240.1	57
AFAFQLAQK	AT1G67730.1	58
AFAYFVLSGGR	AT5G13430.1;AT5G13440.1	59
AFDPVETIK	AT3G01500.1;AT3G01500.3;AT3G01500.2	60
AFEPGLLAK	AT5G45930.1;AT4G18480.1	61
AFHEQLSVAEITNSAFEPASMMAK	AT4G14960.2;AT1G50010.1;AT1G04820.1;AT4G14960.1	62
AFMEMNMILEAMK	AT2G22690.2;AT2G22690.1	63
AFMTADLPHELIELLEK	AT3G11130.1;AT3G08530.1	64
AFTPTQVMGMMLSNLK	AT1G79930.2;AT1G79930.1;AT1G79920.2;AT1G79920.1	66
AGAASALFLLDIK	AT1G60780.1;AT1G10730.1	67
AGAIHEEIYR	AT1G06950.1	68
AGALGDSVSITR	AT5G27770.1	69
AGALGDSVTITR	AT3G05560.3;AT3G05560.2;AT3G05560.1	70
AGELSAAEIDNLMTIVANPR	AT4G09800.1;AT1G34030.1;AT1G22780.1	71
AGFAGDDAPR	AT5G09810.1;AT3G53750.1;AT2G37620.2;AT2G37620.1;AT2G42100.1;AT3G18780.2;AT1G49240.1;AT3G18780.1;AT3G12110.1;AT5G59370.2;AT5G59370.1;AT3G46520.1	72
AGHPPGAINVEMYR	AT4G27700.1	73
AGIALSDK	AT1G13440.1;AT1G13440.2;AT3G04120.1	74
AGIALSDKFVK	AT1G13440.1;AT1G13440.2;AT3G04120.1	75
AGIIDPLK	AT2G33210.2;AT2G33210.1;AT3G23990.1	76
AGSAPEGTQFDAR	AT3G13920.1;AT3G13920.4;AT3G13920.2	78
AGSMDNGDGIAVGWLGHPVFR	ATCG00680.1	79
AGVHFGHGTR	ATCG00160.1	80
AHGGVSVFGGVGER	ATCG00480.1	81
AHMGIFTELGVLYAR	AT3G11130.1;AT3G08530.1	82
AHPDVFNMMLQILEDGR	AT5G50920.1;AT3G48870.2;AT3G48870.1	83
AIALTVDTPR	AT3G14415.3;AT3G14415.1;AT3G14415.2	85
AIDLIDEAGSR	AT5G50920.1;AT3G48870.2;AT3G48870.1;AT5G51070.1	86
AIELPNAMENAGAALIR	AT2G28000.1	87
AIELTEQANTK	ATCG00800.1	88
AIEVVDLDQK	AT2G29140.1;AT2G29200.1;AT2G29190.2;AT2G29190.1	89
AIFAEGCK	AT3G23990.1	90
AIGGGLSSVGGGSSTIK	CON__P02538	92
AIIQYLPYVTR	ATCG01110.1	93
AIKEEIK	AT5G17920.2;AT5G17920.1;AT3G03780.3;AT3G03780.2;AT3G03780.1	94
AIKEEIKK	AT5G17920.2;AT5G17920.1;AT3G03780.3;AT3G03780.2;AT3G03780.1	95
AIKEESEGKLK	AT3G04120.1	96
AILIAGQPGTGK	AT5G67630.1;AT3G49830.1	97
AILNLSLR	AT5G35630.3;AT5G35630.2;AT5G35630.1	98
AIVVNVPYR	AT1G48830.2;AT1G48830.1	99
AKFEELCSDLLDR	AT4G24280.1	102
AKPQQPSTLSTAPSGSENK	AT1G80030.3;AT1G80030.2;AT1G80030.1	103
ALAALRLEDLR	ATCG00490.1	104
ALADGFMVK	AT1G20920.1;AT1G20920.2	105
ALAENEGEGLAK	AT4G16155.1	106
ALAGQKDEALFSANAAALASR	AT5G17920.2;AT5G17920.1	107
ALAIANMVLGLK	AT1G36160.2;AT1G36160.1	108
ALCTGEAGVGK	AT3G63400.2;AT3G63400.3;AT3G63400.1	109
ALDNLQTENEDQR	AT3G13860.1	110
ALEEANADLEVK	CON__P02533;CON__Q6IFX2;CON__P19012;CON__P08779	111
ALEEANTELEVK	CON__Q04695;CON__Q9QWL7	112
ALEESNYELEGK	CON__P13645;CON__P02535	113
ALELSEQPVPDDLK	AT1G20920.1;AT1G20920.2	114
ALEQFVNR	AT1G02080.2;AT1G02080.1	115
ALESLTGAVFQRPPLISAVK	AT3G57150.1	116
ALESSLSPIVIFATNR	AT5G22330.1	117
ALETAFAQYGDVIDSK	AT2G21660.2;AT2G21660.1	118
ALGDYLGVK	AT3G13920.1;AT3G13920.3;AT3G13920.4;AT3G13920.2;AT1G72730.1	119
ALGDYQGVK	AT1G54270.1;AT1G54270.2	120
ALGVDTVPVLVGPVSYLLLSK	AT5G17920.2;AT5G17920.1	121
ALGYMIAQCLGAICGVGFVK	AT4G35100.2;AT4G35100.1	122
ALHQFDCLR	AT5G65010.1;AT5G65010.2	123
ALLAVSGR	AT4G16155.1;AT3G16950.1;AT3G16950.2	124
ALLDVGLIR	AT3G25520.2;AT5G39740.2;AT5G39740.1;AT3G25520.1	125
ALLGEIEGTCITR	ATCG00740.1	126
ALLLAGPPGTGK	AT5G22330.1	127
ALNLGVNVK	AT4G30190.1;AT4G30190.2;AT2G24520.1;AT2G18960.1	129
ALNVEIAK	AT3G23900.3;AT3G23900.1;AT3G23900.2	130
ALPTYTPESPGDATR	AT3G60750.2;AT3G60750.1	131
ALQESLASELAAR	AT4G04640.1	132
ALQNTCLK	AT2G21330.1;AT4G38970.1	133
ALSLPTGLGIVCASPK	AT2G13360.2;AT2G13360.1	134
ALSSPNLDIR	AT4G31490.1;AT4G31480.2;AT4G31480.1	135
ALSTSKPDPVVEDQA	AT2G41840.1	136
ALVAYYQK	AT5G18380.2;AT5G18380.1;AT5G18380.3;AT2G09990.1;AT3G04230.1	137
ALYDQYGEAGVK	AT1G80030.3;AT1G80030.2;AT1G80030.1	139
AMGIMNSFINDIFEK	AT5G02570.1;AT3G53650.1;AT2G37470.1;AT5G22880.1;AT3G46030.1;AT1G07790.1;AT5G59910.1;AT3G45980.1;AT2G28720.1	140
AMGNEARLSSEMNFTFLK	AT3G22250.1	141
AMHAVIDR	ATCG00490.1	142
AMIGQVAGGGR	AT2G18020.1;AT4G36130.1;AT3G51190.1	143
ANELFVGR	AT1G44575.1;AT1G44575.2	145
ANLGDLR	AT4G27440.2;AT4G27440.1	146
ANLGMEVMHER	ATCG00020.1	147
ANLQDLAALTGGEVITDELGMNLEKVDLSMLGTCK	AT3G23990.1	148
ANSLAQLGK	AT2G21330.1;AT2G21330.3;AT2G01140.1;AT4G38970.1	149
APGFGENR	AT2G33210.2;AT2G33210.1;AT3G23990.1	150
APGGPPSNVAISHVR	AT3G54090.1	151
APILSDSSCK	CON__P00760	152
APLGQNTVLLR	AT5G27850.1;AT3G05590.1	153
APQVYTIPPPK	CON__P01868;CON__P01869	154
APQVYTIPPPKEQMAK	CON__P01868;CON__P01869	155
APSTYGGGLSVSSR	CON__P08779	156
APSTYGGGLSVSSSR	CON__P02533	157
AQFFSGGEEYDNGVDDIESPK	AT1G32230.1;AT1G32230.2;AT1G32230.3	158
AQGLEEDPR	AT3G15730.1	159
AQGLEEDPRNYLTFFCLGNR	AT3G15730.1	160
AQHLLHGTLHATIYEVDALHGGGVR	AT3G15730.1	161
AQLGEIFELDR	ATCG00680.1	162
AQNLMQIAMKRLQK	AT3G09530.1	163
AQPGLTATNVNVDEVR	AT1G71500.1	164
AQVPGTTQDHLQIFNIEAK	AT3G11130.1;AT3G08530.1	165
AQYEEIANR	CON__P13647	166
AQYEEIAQR	CON__P35908;CON__P19013;CON__P02538;CON__P04259	167
ARFEELNIDLFR	AT3G09440.2;AT3G09440.1	168
ARFEELNIDLFRK	AT3G09440.2;AT3G09440.1	169
ARFEELNMDLFR	AT5G02500.1;AT5G02500.2;AT3G12580.1	170
ARFEELNMDLFRK	AT5G02500.1;AT5G02500.2;AT3G12580.1	171
ARFEELNNDLFR	AT5G28540.1;AT5G42020.1;AT5G42020.2	172
ARHEEEMALLAR	AT1G03910.1;AT1G03910.2	173
ARLEHHPQGQR	CON__PSB_N_GS_green;CON__PSB_N_GS_yellow;CON__PSB_C_GS_green;CON__PSB_C_GS_yellow;CON__PSB_C_SBP-HA;CON__PSB_C_SBP-Stag;CON__PSB_N_GS_TEV;CON__PSB_N_GS_rhino;CON__PSB_C_GS_TEV;CON__PSB_C_GS_rhino;CON__PSB_C_UBA-GS_rhino	174
ARVYDDEVR	AT2G39730.2;AT2G39730.3;AT2G39730.1	175
ARYDEIIK	AT5G60390.3;AT5G60390.1;AT1G07940.2;AT1G07940.1;AT1G07930.1;AT1G07920.1;AT1G07930.2;AT5G60390.2	176
ASEIPEPNKK	AT3G13460.2;AT3G13460.4;AT3G13460.1;AT3G13460.3	177
ASGDYAIVIAHNPDSDTTR	AT2G18020.1	178
ASHIVGYPR	AT5G17920.2;AT5G17920.1;AT3G03780.3;AT3G03780.2;AT3G03780.1	179
ASITPGTVLIILAGR	AT1G74060.1;AT1G74050.1;AT1G18540.1	180
ASLDDLAVLTGAEVISEER	AT3G13860.1	181
ASLENSLEETK	CON__P02533;CON__P08779;CON__Q9Z2K1;CON__Q3ZAW8	182
ASLKMIGK	AT3G52390.2	183
ASMAGPDHLFNLR	AT1G30630.1	184
ASNMLMQLISCGSISVK	AT2G28150.1	185
ASPFRGPSPVGWIGMPGLPNPPIVK	AT1G09660.1;AT1G09660.2	186
ASSVAQVVTSLQER	ATCG00120.1	187
ATAADVDAEIQQALTNEVK	AT3G11940.2;AT3G11940.1	188
ATAGDTHLGGEDFDNR	AT5G02490.1;AT1G56410.1;AT3G09440.2;AT3G09440.1;AT5G02500.1;AT5G02500.2;AT3G12580.1;AT1G16030.1	189
ATALALAK	AT1G34430.1	190
ATFDCLQK	AT2G41840.1;AT3G57490.1;AT1G59359.1;AT1G58983.1;AT1G58684.1;AT1G58380.1	192
ATGEFTKDENDANKLNR	AT4G31490.1;AT4G31480.2;AT4G31480.1	193
ATGGGLSSVGGGSSTIK	CON__P04259	194
ATLAAVQQMR	AT2G33800.1	195
ATLTVDK	CON__P06328;CON__P01751;CON__P01754;CON__P06329;CON__P01757;CON__P01756;CON__P01750;CON__P06330;CON__P03980;CON__P01749	196
ATMQNLNDR	CON__Q04695;CON__Q9QWL7;CON__Q9C075;CON__Q99PS0	197
ATNLEMESK	ATCG00480.1	198
ATPEQVAAYTLK	AT4G38970.1;AT4G38970.2	199
ATPSETEVVPK	AT4G27500.1	200
ATQGIYPLQNVFIR	AT4G34670.1;AT3G04840.1	201
ATRPPLQSTEPYSR	AT4G21150.2;AT4G21150.3;AT4G21150.1	202
ATTTNLPPLLPDSSIVPFTAMQSAVSK	AT3G25860.1	203
ATVPGQLIWEIVK	AT4G29410.2;AT4G29410.1;AT2G19730.3;AT2G19730.2;AT2G19730.1	204
AVAASAVHPASEGGK	AT1G34430.1	205
AVALVLPNLK	AT1G12900.4;AT1G12900.3;AT1G12900.1;AT1G12900.2;AT3G26650.1	206
AVAMSATEGLK	ATCG00480.1	207
AVAMSATEGLKR	ATCG00480.1	208
AVDSLVPIGR	ATMG01190.1;AT2G07698.1	209
AVEFAFR	AT3G11130.1;AT3G08530.1	210
AVFVDLEPTVIDEVR	AT4G14960.2;AT1G50010.1;AT1G04820.1;AT4G14960.1;AT5G19780.1;AT5G19770.1	211
AVILLQGR	AT4G15000.2;AT4G15000.1;AT3G22230.1;AT2G32220.1	212
AVITVPAYFNDSQR	AT4G24280.1;AT5G49910.1	213
AVLMDLEPGTMDSLR	AT5G44340.1;AT5G62700.1;AT5G62690.1	214
AVLMDLEPGTMDSVR	AT2G29550.1	215
AVMSELFGK	AT1G01090.1	216
AVQESLVLHVDSLSR	AT1G16610.2;AT1G16610.1;AT1G16610.3	217
AVSEGMVGQVK	AT5G67630.1	218
AVSETSDELAK	AT4G10340.1	219
AVSLVLPQLK	AT1G42970.1	220
AVVDQGMQR	ATCG00750.1	221
AVVIYVPFR	AT3G02560.2;AT3G02560.1	222
AVVQVFEGTSGIDNK	AT1G76030.1;AT1G20260.1;AT4G38510.4;AT4G38510.3;AT4G38510.2;AT4G38510.1;AT4G38510.5	223
AVYECLR	ATCG00490.1;ATMG00280.1;AT2G07732.1	224
AVYYIVMQCLGAICGAGVVK	AT2G45960.2;AT2G45960.1;AT2G45960.3	225
AYIPVDQVINGEEVDQWVEILDNDRNPIQGGSK	AT3G15730.1	226
AYLPVVESFGFSSQLR	AT1G56070.1	227
CCLEHAASVAK	AT1G55490.2;AT1G55490.1;AT3G13470.1	228
CDHVAVGTGTVTHK	AT1G74470.1	229
CELDDPLILIHEK	AT3G23990.1	230
CELEDPLILIHEK	AT2G33210.2;AT2G33210.1	231
CEMEQQNQEYK	CON__P02533;CON__Q61782;CON__Q04695;CON__Q9QWL7	232
CFFPEIYESDER	AT1G32230.1;AT1G32230.2;AT1G32230.3	233
CGGEDVKDAYVLYK	AT1G32870.1;AT1G32870.2	234
CGINYQPPTVVPGGDLAK	AT4G14960.2;AT1G50010.1;AT1G04820.1;AT4G14960.1;AT5G19780.1;AT5G19770.1	235
CKNPQEYYALYK	AT1G34190.1	236
CLQLYMNRDEVVK	AT3G61700.1;AT3G61700.2	237
CMEPVEK	AT5G02490.1;AT3G09440.2;AT3G09440.1;AT5G02500.1;AT5G02500.2;AT3G12580.1	238
CQEEDVEMNEEAK	AT5G67630.1;AT3G49830.1	239
CRVNSAAFPAPIEK	CON__P01868;CON__P01869	240
CVEDPKQNAPHDIK	AT1G32230.1;AT1G32230.2;AT1G32230.3	241
CVKPPVIYGDVSRPK	AT5G17920.2;AT5G17920.1;AT3G03780.3;AT3G03780.2;AT3G03780.1	242
CWEDIFDAISNAK	AT3G15730.1	243
DAEAWFNEK	CON__P13645;CON__Q148H6;CON__Q7Z3Y7;CON__Q7Z3Z0;CON__Q7Z3Y8	244
DAEEWFFTK	CON__P02533;CON__Q6IFX2	245
DAEEWFFTKTEELNR	CON__P02533;CON__Q6IFX2	246
DAETWFLSK	CON__P08779	247
DAGVIAGLNVLR	AT5G02490.1;AT1G56410.1	248
DAGVIAGLNVMR	AT3G09440.2;AT3G09440.1;AT5G02500.1;AT5G02500.2	249
DAISSGVDGYDAETR	AT1G06950.1	250
DALGNDVVAAEWLK	AT4G03280.2;AT4G03280.1	251
DAPMFVVGVNEHEYK	AT1G13440.1;AT3G04120.1	252
DAVLLVFANK	AT3G62290.3;AT3G62290.2;AT3G62290.1;AT2G47170.1;AT1G70490.3;AT1G70490.2;AT1G70490.1;AT1G23490.1;AT1G10630.1;AT5G14670.1	253
DAVTYTEHAR	AT5G59970.1;AT5G59690.1;AT3G53730.1;AT3G46320.1;AT3G45930.1;AT2G28740.1;AT1G07820.2;AT1G07820.1;AT1G07660.1;AT1G07660.2	254
DAYVGDEAQSKR	AT5G09810.1;AT3G53750.1;AT2G37620.2;AT2G37620.1;AT3G18780.2;AT1G49240.1;AT3G18780.1;AT3G12110.1;AT5G59370.2;AT5G59370.1;AT3G46520.1	255
DAYVLYK	AT1G32870.1;AT1G32870.2	256
DCGCKPCICTVPEVSSVFIFPPKPK	CON__P01868;CON__P01869	257
DDENVNSQPFMR	ATCG00490.1;ATMG00280.1;AT2G07732.1	258
DDKTLLFGEKPVTVFGIR	AT1G13440.1;AT1G13440.2	259
DDLFNINANIVK	AT3G47520.1	260
DDNPIGATLIGR	AT3G15730.1	261
DDPEVQFSWFVDDVEVHTAQTQPR	CON__P01868;CON__P01869	262
DDSEYLLLNQLGGILGLSSK	AT1G06950.1	263
DDTIILHGGGDKK	AT3G13860.1	264
DDVELVAVNDPFITTEYMTYMFK	AT1G13440.1;AT1G13440.2;AT3G04120.1	265
DEAETAAVAWR	AT4G00650.1	266
DEFQNSVKRSSGSVYSK	AT4G00450.1	267
DEYERHNSYTCEATHK	CON__P01837	268
DEYERHNSYTCEATHKTSTSPIVK	CON__P01837	269
DFLLTLLSK	AT2G38750.1	270
DFPMCGFSNTVVQILK	AT3G54900.1	271
DGEYEPAEKPDPDTDYMR	AT3G15730.1	272
DGKPYIQVK	AT5G28540.1;AT1G09080.2;AT1G09080.1;AT5G42020.1;AT5G42020.2	273
DHMVLLEFVTAAGITLGMDELYK	CON__PSB_N_GS_green;CON__PSB_N_GS_yellow;CON__PSB_C_GS_green;CON__PSB_N_GFP;CON__PSB_C_GFP;CON__PSB_C_GS_yellow	275
DHTVSATHGDMDQNTR	AT1G54270.1;AT1G54270.2;AT3G13920.1;AT3G13920.3;AT3G13920.4;AT3G13920.2;AT1G72730.1	276
DINVKWKIDGSER	CON__P01837	278
DIQWLQTITNMPILVK	AT3G14415.3;AT3G14415.1;AT3G14415.2	279
DISDAHYK	AT5G35630.3;AT5G35630.2;AT5G35630.1	280
DISFGIGAR	AT3G13860.1	281
DITQLVEVRPESDR	AT1G20920.1;AT1G20920.2	282
DKATLTVDK	CON__P01749	283
DKGVAPTEFEEQVTQALFDLENTNQELK	AT3G02560.2;AT3G02560.1	284
DKSFIAAR	AT5G65010.1;AT5G65010.2;AT5G10240.2;AT5G10240.1	285
DKVSLTCMITDFFPEDITVEWQWNGQPAENYK	CON__P01868;CON__P01869	286
DLAELIAAGR	AT2G27710.4;AT2G27710.3;AT2G27710.2;AT2G27710.1;AT2G27720.1;AT2G27720.3;AT2G27720.2	287
DLATAFLNVLGNEK	AT1G09340.1	289
DLAVEGNEIIR	ATCG00490.1	290
DLFEDVTEELEK	AT1G44910.2;AT1G44910.1	291
DLLTLDEK	AT5G15200.1;AT5G15200.2	292
DLNVVGFGLIGWLAPSSIPAINGK	AT1G08380.1	293
DLPPQLESNQGAR	AT1G32230.1	294
DLQDDFMGGAEIIKSDPVVSFR	AT1G56070.1	295
DLSDIIITPSPVMFQEDHDVWNVQLFR	AT3G15730.1	296
DLSVENGGLAPGFR	AT1G32870.1;AT1G32870.2	297
DLTDSLMK	AT5G09810.1	298
DLTDYLMK	AT3G18780.2;AT1G49240.1;AT3G18780.1;AT3G12110.1	299
DLVGVLEDAIR	AT1G55490.2;AT1G55490.1;AT3G13470.1	300
DNGLLLHIHR	ATCG00490.1	301
DNIQGITKPAIR	AT5G59970.1;AT5G59690.1;AT3G53730.1;AT3G46320.1;AT3G45930.1;AT2G28740.1;AT1G07820.2;AT1G07820.1;AT1G07660.1	302
DNNLLGK	AT5G02490.1;AT3G09440.2;AT3G09440.1;AT5G02500.1;AT3G12580.1	303
DNSGVTLEGPK	AT1G32230.1;AT1G32230.2;AT1G32230.3	304
DNSGVTLEGPKDLPPQLESNQGAR	AT1G32230.1	305
DPEQGALLK	AT4G10340.1	306
DPSGAGGYQIPR	AT3G55360.1	307
DPTLAVVAYR	AT3G11130.1;AT3G08530.1	308
DQISVAFGDGYGNQIYAPR	AT5G62200.1	309
DQYEQMAEK	CON__P08779;CON__Q9Z2K1;CON__Q3ZAW8	310
DRDEMFTKFMTR	AT1G23201.1	311
DRQWFFFSLR	AT1G32870.1;AT1G32870.2	312
DRVIHCDSRPVGEK	AT1G32870.1;AT1G32870.2	313
DRVTDALNATK	AT2G33210.2;AT2G33210.1;AT3G23990.1	314
DSAVNAICYGAK	AT3G57150.1	315
DSEIAMGGYQPHHLSHR	AT3G15730.1	316
DSGKTEAAAEIVFSGK	AT1G71500.1	317
DSGLQTGDPAGFTLADTLACGTVGHIIGVGVVLGLK	AT1G30380.1	318
DSNCIQFLHDK	AT3G44540.2;AT3G44540.1	319
DSPLDIIAINDTGGVK	AT3G26650.1	320
DSPLDVVVINDTGGVK	AT1G12900.4;AT1G12900.3;AT1G12900.1	321
DSPLEVVVLNDSGGVK	AT1G42970.1	322
DSTLIMQLLR	AT5G38480.2;AT5G38480.1;AT1G78300.1;AT3G02520.1;AT4G09000.1;AT1G35160.1;AT5G16050.1;AT1G35160.2;AT4G09000.2;AT5G65430.2;AT5G65430.1;AT1G22300.3;AT1G34760.2;AT1G22300.2;AT1G22300.1;AT1G34760.1;AT5G65430.3;AT2G42590.2;AT2G42590.1;AT1G26480.1;AT2G42590.3	323
DSTYSMSSTLTLTK	CON__P01837	324
DSTYSMSSTLTLTKDEYER	CON__P01837	325
DSTYSMSSTLTLTKDEYERHNSYTCEATHK	CON__P01837	326
DTDILAAFR	ATCG00490.1	327
DTEAAVDAEDESAAEK	AT3G57150.1	328
DTIADIITSIR	ATCG00770.1	329
DTLGQEINVTCEVQQLLGNNR	ATCG00480.1	330
DVCYLYLLR	AT2G41475.1	331
DVDGAYMTK	CON__P04264	332
DVDNAYMIK	CON__P35908	333
DVIFVATR	AT3G02560.2;AT3G02560.1	334
DVILIATR	AT1G48830.2;AT1G48830.1	335
DVIQALR	AT3G15730.1	336
DVLTITLTPK	CON__P01868;CON__P01869	337
DVNAAVGTIK	AT4G14960.2;AT1G50010.1;AT1G04820.1;AT4G14960.1;AT5G19780.1;AT5G19770.1	338
DVNEQDVLLFIDNIFR	ATCG00480.1	339
DVNLSSGER	AT3G15356.1;AT3G16530.1	340
DVTLLPLSPK		341
DYQELMNTK	CON__P04264	343
DYQELMNVK	CON__P35908;CON__Q01546;CON__Q5XKE5	344
EAAGLVVDMIK	AT5G22330.1	345
EAEAISVDVTSK	AT1G06950.1	346
EAEEFAEEDKK	AT5G28540.1;AT5G42020.1	347
EAELEEDSEYFIGPAPPAVVAEVASSNEAERFEEVTR	AT1G65280.1	348
EAENCDCLQGFQVCHSLGGGTGSGMGTLLISK	AT5G62700.1;AT5G62690.1;AT1G20010.1;AT2G29550.1;AT5G12250.1	349
EALEGNDVEAK	AT4G31490.1;AT4G31480.2;AT4G31480.1	351
EAMTPLSEFEDKL	AT1G56070.1	352
EANNFLWPFQLK	AT2G01250.1;AT2G44120.1;AT2G44120.2;AT3G13580.3;AT3G13580.2;AT3G13580.1	353
EASALDLQNR	AT5G16780.1	354
EAVNVSLANLLTYPFVR	AT5G14740.2;AT5G14740.1;AT3G01500.1;AT3G01500.3;AT3G01500.2	356
EAYPGDVFYLHSR	ATCG00120.1	357
ECGIKANSLIYTTLMDAYFKSGNPTEGLHLLDEMK	AT2G02150.1	358
ECLPLVLIIR	AT5G07090.2;AT2G17360.1;AT5G58420.1;AT5G07090.1;AT2G17360.2	359
EDGNILGHK	CON__PSB_N_GS_green;CON__PSB_N_GS_yellow;CON__PSB_C_GS_green;CON__PSB_N_GFP;CON__PSB_C_GFP;CON__PSB_C_GS_yellow;CON__P42212;CON__Q9U6Y5	360
EDLAALEK	AT4G14960.2;AT1G50010.1;AT1G04820.1;AT1G64740.1;AT5G19780.1;AT5G19770.1	361
EEACMISKNLMQLYEDEVR	AT1G01660.1	362
EEIPDLLKLDDVIDLVIPR	AT2G39800.2;AT2G39800.3;AT2G39800.4;AT2G39800.1;AT3G55610.1;AT3G55610.2	363
EEQFNSTFR	CON__P01868;CON__P01869;CON__P01859	364
EESPGPSGGGSVSPFNSSGK	AT2G38610.2;AT2G38610.1	365
EESPSPSLSPCLSPSMSPFNSK	AT1G09660.1	366
EESPSPSLSPCLSPSMSPFNSKR	AT1G09660.1	367
EFAAEEISSMVLIK	AT5G02500.1;AT5G02500.2	368
EFALSNGLMNK	AT2G24700.1	369
EFLNGDLIAK	AT1G31330.1	371
EFVYDLFEAATGMR	ATCG01110.1	372
EGAIQQLENAR	ATCG00130.1	373
EGFIENVR	ATCG00770.1	374
EGFIENVRK	ATCG00770.1	375
EGGNKNEGGNK	AT5G45470.1	376
EGIGITEILDAIVQR	AT5G08650.1	377
EGIPELSMEDYFSK	AT1G79200.1	378
EGIQEQLER	ATCG00120.1	379
EGLVSDAIESFIR	AT3G11130.1;AT3G08530.1	380
EGNDLYMEMK	ATCG00480.1	381
EGNFDLVGNNFPVFFIR	AT4G35090.1;AT4G35090.2	382
EGNFDLVGNNTPVFFIR	AT1G20620.5;AT1G20620.1;AT1G20620.2;AT1G20620.4	383
EGPLAEENMR	AT1G56070.1;AT3G12915.1;AT3G12915.2	384
EGPPVFEQPEMTYEK	AT2G39730.2;AT2G39730.3;AT2G39730.1	385
EGRVPLQTIEAK	ATCG00800.1	386
EGSAILMHTSSQK	AT5G26742.1;AT5G26742.2;AT5G26742.3	387
EGVITIQDGK	AT2G33210.2;AT2G33210.1;AT3G23990.1	388
EHALLAFTLGVK	AT5G60390.3;AT5G60390.1;AT1G07940.2;AT1G07940.1;AT1G07930.1;AT1G07920.1;AT1G07930.2;AT5G60390.2	389
EHAPSIIFMDEIDSIGSAR	AT5G20000.1;AT5G19990.1	390
EHFSSCGEIK	AT1G48920.1	391
EHGNSPGYYDGR	AT1G67090.1	392
EHGNTPGYYDGR	AT5G38420.1;AT5G38410.1;AT5G38410.3;AT5G38430.1	393
EHNMLGGFAFIGEGIPVATGAAFSSK	AT1G01090.1	395
EIADILLK	AT5G50920.1	396
EIAEAFLGSPVK	AT3G12580.1	397
EIAEAFLGTTVK	AT5G02490.1	398
EIAEAYLGTTIK	AT3G09440.2;AT3G09440.1	399
EIAEAYLGVTIK	AT5G02500.1;AT5G02500.2	400
EIEGWTAR	AT5G59850.1;AT1G07770.2;AT1G07770.1;AT3G46040.1	402
EIETYHNLLEGGQEDFESSGAGK	CON__P35527	403
EIFMPALSSTMTEGK	AT1G34430.1;AT3G25860.1	404
EIGELIAK	AT2G33210.2;AT2G33210.1;AT3G23990.1	405
EIKIEISELNR	CON__P35908	406
EILDDLLTPMEETHDMYKK	AT5G56140.1	407
EILHIQGGQCGNQIGAK	AT5G44340.1;AT5G62700.1;AT5G62690.1	408
EILHIQGGQCGNQIGSK	AT1G20010.1;AT2G29550.1;AT5G12250.1	409
EISPLLGLCIQAPR	AT5G20490.2;AT5G20490.1;AT1G54560.1;AT1G08730.1	410
EISTGAGAIR	ATCG00180.1	411
EITALAPSSMK	AT5G09810.1;AT3G53750.1;AT2G37620.2;AT2G37620.1;AT3G18780.2;AT1G49240.1;AT3G18780.1;AT3G12110.1;AT5G59370.2;AT5G59370.1;AT3G46520.1	412
EITFNFPTIDKLDGQE	ATCG00490.1	413
EIVDLCLDR	AT4G14960.2;AT1G50010.1;AT1G04820.1;AT4G14960.1;AT5G19780.1;AT5G19770.1	414
EKYETNPALYGELAK	AT5G14740.2;AT5G14740.1;AT5G14740.5;AT5G14740.4;AT5G14740.3;AT3G01500.1;AT3G01500.3;AT3G01500.2	415
ELAALNGTLR	AT1G09660.1	416
ELAALNGTLREESPSPSLSPCLSPSMSPFNSK	AT1G09660.1	417
ELAALNGTLREESPSPSLSPCLSPSMSPFNSKR	AT1G09660.1	418
ELAEDGYSGVEVR	AT2G31610.1;AT5G35530.1	419
ELALLNSNLR	AT3G08620.1	420
ELALLNSNNLR	AT2G38610.2;AT2G38610.1	421
ELAQQIEK	AT1G54270.1;AT1G54270.2;AT3G13920.1;AT3G13920.3;AT3G13920.4;AT3G13920.2;AT1G72730.1	422
ELDEQAAAVMR	AT4G32260.1	423
ELDYLVGAVSNPK	AT3G12780.1;AT1G56190.2;AT1G56190.1	424
ELEAHIESSEK	AT5G41790.1	425
ELEEQVESSK	AT5G41790.1	426
ELEKLPTANFDQK	AT3G23990.1	427
ELESICNPIIAK	AT3G09440.2;AT3G09440.1;AT5G02500.1;AT5G02500.2	428
ELESVCNPIIAK	AT5G02490.1	429
ELEVIHSR	AT2G34420.1;AT2G34430.1;AT2G05100.1;AT2G05070.1;AT3G27690.1;AT1G29930.1;AT1G29920.1;AT1G29910.1	430
ELGFEVPMEEEIK	AT5G23080.2;AT5G23080.1	431
ELGVPIVMHDYLTGGFTANTSLSHYCR	ATCG00490.1	432
ELIEGLPK	AT3G27850.1;AT3G27830.1	433
ELINQLNIR	ATCG01120.1	434
ELLESFGGLK	AT4G36690.2;AT4G36690.4;AT4G36690.3;AT4G36690.1	435
ELTGLQPIVEK	AT1G06950.1	438
ELTSLVQK	AT2G31610.1;AT5G35530.1	439
ELTTEIDNNIEQISSYK	CON__P13645	440
ELVQQIHSDIR	AT1G20920.1;AT1G20920.2	441
EMLLEFPNVGNDLK	AT1G65280.1	442
ENAPAIIFIDEVDAIATAR	AT5G58290.1	443
ENNFVILDVRPEAEYK	AT4G27700.1	444
ENNQYFLILTLR	ATCG00770.1	445
EQGPLFGFTK	AT1G44575.1	446
EQHTLIIYDDLSK	ATCG00120.1	447
EQLKELAALNGTLR	AT1G09660.1	448
EQLKELAALNGTLREESPSPSLSPCLSPSMSPFNSK	AT1G09660.1	449
EQVFSTYSDNQPGVLIQVFEGER	AT5G02490.1	450
EQVFSTYSDNQPGVLIQVYEGER	AT3G09440.2;AT3G09440.1;AT5G02500.1	451
ERIEQYNR	ATCG00120.1	452
ERYLTELLQER	AT1G09660.1;AT1G09660.2	453
ESGVINEQNLAESK	ATCG00480.1	455
ESIDLHDSFDQIGLAQK	AT3G11130.1;AT3G08530.1	456
ESPAAVQTSSDVK	AT3G13460.2;AT3G13460.4;AT3G13460.1	457
ESTISDFKNDVCNLLIATSVAAR	AT1G20920.1;AT1G20920.2	458
ESTLGFVDLLR	ATCG00490.1	459
ESTLGFVDLLRDDYVEK	ATCG00490.1	460
ESTLGFVDLLRDDYVEKDR	ATCG00490.1	461
ESTLHLVLR	AT1G23410.1;AT3G62250.1;AT2G47110.2;AT2G47110.1;AT3G52590.1;AT2G36170.1;AT4G05050.4;AT2G35635.1;AT1G31340.1;AT4G05050.3;AT4G05050.2;AT4G05050.1;AT4G02890.2;AT4G02890.1;AT1G55060.1;AT4G05320.5;AT4G02890.4;AT4G02890.3;AT5G03240.3;AT5G03240.2;AT5G03240.1;AT1G65350.1;AT5G37640.1;AT4G05320.6;AT4G05320.3;AT4G05320.1;AT5G20620.1;AT4G05320.4;AT4G05320.2;AT3G09790.1;CON__P62979	462
ETCADDPVSGECVAAWDEVEELSAAASHAR	AT2G47400.1	463
ETLMGTMRMNFNYYPK	AT5G12270.1	465
ETSTIVGDGSTQDAVK	AT1G55490.2;AT1G55490.1	466
EVAAFAQFGSDLDAATQALLNR	ATMG01190.1;AT2G07698.1	467
EVADYLGTR	AT5G65010.1;AT5G65010.2;AT5G10240.2;AT5G10240.1	468
EVASNSELVQSSR	CON__P08779	469
EVATNSELVQSGK	CON__P02533;CON__Q04695;CON__Q9QWL7	470
EVCFACVDAEEFR	AT3G11130.1;AT3G08530.1	471
EVDEQMLNVQNK	AT5G62700.1;AT5G62690.1;AT2G29550.1	472
EVDYLLR	AT5G38420.1;AT5G38410.1;AT5G38410.3;AT5G38410.2;AT5G38430.1	473
EVELEDPVENIGAK	AT1G55490.2;AT1G55490.1;AT3G13470.1;AT5G56500.2;AT5G56500.1	474
EVFTSSSSSSSR	CON__P08779	475
EVHFLPFNPVDKR	AT4G30190.1;AT4G30190.2;AT2G18960.1	476
EVLSAVMMHGLGVGGAFIK	AT2G35510.1	477
EVLSAVMMQGLGVGGAFIR	AT1G32230.1;AT1G32230.2;AT1G32230.3	478
EVLSAVMMQGLGVGGAFIRK	AT1G32230.1;AT1G32230.2;AT1G32230.3	479
EVTIVNTGTVLQVGDGIAR	ATCG00120.1	480
EWVAGMSSAGDR	CON__PSB_GFP-trap_min;CON__PSB_GFP-trap	481
EYIDAAVR	AT2G31610.1;AT5G35530.1	482
EYPGAFIR	AT5G38420.1;AT5G38410.1;AT5G38410.3;AT5G38410.2;AT5G38430.1	483
EYPNAFIR	AT1G67090.1	484
EYVEALALLSTLVK	AT1G29150.1	485
FAAGTEAIANK	AT3G12780.1	486
FAFVEMR	AT1G60900.1;AT4G36690.2;AT4G36690.4;AT4G36690.3;AT4G36690.1	489
FAGVNMR	AT5G18380.2;AT5G18380.1;AT5G18380.3;AT2G09990.1	490
FALESFWDGK	AT5G17920.2;AT5G17920.1;AT3G03780.3;AT3G03780.2;AT3G03780.1;AT5G20980.2;AT5G20980.1	491
FAMLGAAGAIAPEILGK	AT1G61520.2;AT1G61520.3;AT1G61520.1	492
FAQYTGANAIAGR	AT1G72370.2;AT1G72370.1	493
FASFINKVR	CON__Q9NSB4	495
FASNVVEK	AT2G29140.1;AT2G29200.1;AT2G29190.2;AT2G29190.1;AT3G10360.1	496
FASSVWTFLESIPAK	AT1G32870.1;AT1G32870.2	497
FASSVWTFLESIPAKPAYASENPFVK	AT1G32870.1;AT1G32870.2	498
FCNGAPPPAVNDGTLDSK	AT1G20920.1;AT1G20920.2	499
FDPEELPEK	AT1G32870.1;AT1G32870.2	500
FEELNIDLFR	AT3G09440.2;AT3G09440.1	503
FEELNMDLFR	AT5G02500.1;AT5G02500.2;AT3G12580.1	504
FEELNMDLFRK	AT5G02500.1;AT5G02500.2;AT3G12580.1	505
FEGDTLVNR	CON__PSB_N_GS_green;CON__PSB_N_GS_yellow;CON__PSB_C_GS_green;CON__PSB_N_GFP;CON__PSB_C_GFP;CON__PSB_C_GS_yellow;CON__P42212;CON__Q9U6Y5	506
FEGDTLVNRIELK	CON__PSB_N_GS_green;CON__PSB_N_GS_yellow;CON__PSB_C_GS_green;CON__PSB_N_GFP;CON__PSB_C_GFP;CON__PSB_C_GS_yellow;CON__P42212;CON__Q9U6Y5	507
FETLSYLPDLSDVELAKEVDYLLR	AT5G38420.1;AT5G38410.1;AT5G38410.3;AT5G38410.2	508
FETLSYLPDLTDSELAK	AT1G67090.1;AT1G67090.2	509
FFDPLGLAGK	AT1G15820.1	510
FFLFYER	AT2G35840.3;AT2G35840.2;AT2G35840.1;AT1G51420.1	511
FFLYQLLR	AT1G01560.2;AT4G01370.1;AT1G01560.1	512
FFQLYVYK	AT3G14415.3;AT3G14415.1;AT3G14415.2	513
FGEAPGTGDSSEFLNPVPSGISTTNEDDPSKDESSK	AT1G32870.1	514
FGFVPDLTHYLYTNNMLR	AT3G11130.1	515
FGGAIDDAAR	AT5G49460.1;AT3G06650.1	517
FGGFGGPGGVGGLGGPGGFGPGGYPGGIHEVSVNQSLLQPLNVK	CON__P35908	518
FGIVEGLMTTVHSITATQK	AT1G13440.1;AT3G04120.1	519
FGLAPSANR	AT1G30380.1	520
FGLAPSANRK	AT1G30380.1	521
FGVVESK	AT1G56070.1	522
FGYNAATGKYEDLMAAGIIDPTK	AT1G55490.2;AT1G55490.1;AT3G13470.1	523
FHAGPPYEDIAFR	AT1G03910.1;AT1G03910.2	524
FHEETGVTFASLYPGCIASTGLFR	AT4G27440.2;AT4G27440.1	525
FHPTDEELVVYYLK	AT1G32870.1;AT1G32870.2	526
FHPTDEELVVYYLKR	AT1G32870.1;AT1G32870.2	527
FICTTGK	CON__PSB_N_GS_green;CON__PSB_N_GS_yellow;CON__PSB_C_GS_green;CON__PSB_N_GFP;CON__PSB_C_GFP;CON__PSB_C_GS_yellow;CON__P42212;CON__Q9U6Y5	528
FIGLFLSR	AT1G09340.1	529
FILIGSGNPEEGELRPQLLDR	AT5G45930.1;AT4G18480.1	530
FKFPVDSVELYAEK	AT2G31610.1	531
FKLSNLPNAEGNLIAK	AT1G32230.1;AT1G32230.2;AT1G32230.3	532
FLALDEADR	AT3G58510.3;AT3G58510.2;AT3G58510.1;AT2G42520.1;AT3G58570.1	533
FLDGIYVSEK	AT1G33140.1;AT1G33120.1;AT4G10450.1	534
FLEQQNQVLQTK	CON__P04264;CON__Q6IFZ6;CON__Q9R0H5;CON__P35908;CON__Q6NXH9;CON__Q7Z794	536
FLFCAEAIYK	ATCG00490.1	537
FLIVMQK	AT5G59850.1;AT1G07770.2;AT1G07770.1;AT3G46040.1	538
FLKPSVAGFLLQK	AT3G12780.1;AT1G56190.2;AT1G56190.1	539
FLLQEKV	ATCG00120.1	540
FLNDKVTK	AT4G24280.1;AT5G49910.1	541
FLPDKAIDLIDEAGSR	AT5G50920.1;AT3G48870.2;AT3G48870.1;AT5G51070.1	542
FLPLGLGLLYLGK	AT4G28470.1;AT2G20580.1	543
FLSEACDLVFDAASR	ATCG00160.1	544
FLVLAPTR	AT5G26742.1;AT5G26742.2;AT5G26742.3	545
FLVPLIYAPALPLIR	AT1G68680.1	546
FMGGSMGSVVGEK	ATCG00500.1	547
FNLIYVITK	AT3G11130.1;AT3G08530.1	549
FNLNVQAVNVLLDNVR	AT3G11130.1;AT3G08530.1	550
FPCIQIIK	AT2G34480.1;AT1G29965.1;AT1G29970.2;AT3G14600.1	551
FPGQLNSDLR	AT5G44340.1;AT5G62700.1;AT5G62690.1;AT1G20010.1;AT2G29550.1;AT5G12250.1	552
FQELFAQTK	AT3G11130.1;AT3G08530.1	554
FQSVPVQAGQTPPLLQYFGTLLTR	AT3G11130.1;AT3G08530.1	556
FSAPGFR	AT1G34190.1	558
FSDASVQSDR	AT5G02490.1	559
FSDENFR	AT3G63400.2;AT3G63400.3;AT3G63400.1	560
FSDSSVQSDMK	AT5G02500.1;AT5G02500.2	561
FSFVPDLTHYLYTNNMLR	AT3G08530.1	562
FSLAPLVPR	AT3G12780.1;AT1G56190.2;AT1G56190.1	563
FSNSSSSNEFSK	CON__Q5D862	564
FSSCGGGGGSFGAGGGFGSR	CON__P04264	565
FSSEIAEAR	AT1G32230.1;AT1G32230.2;AT1G32230.3	566
FSSSSGYGGGSSR	CON__P35527	567
FSVSGEGEGDATYGK	CON__PSB_N_GS_green;CON__PSB_N_GS_yellow;CON__PSB_C_GS_green;CON__PSB_N_GFP;CON__PSB_C_GFP;CON__PSB_C_GS_yellow;CON__P42212;CON__Q9U6Y5	568
FSVSGEGEGDATYGKLTLK	CON__PSB_N_GS_green;CON__PSB_N_GS_yellow;CON__PSB_C_GS_green;CON__PSB_N_GFP;CON__PSB_C_GFP;CON__PSB_C_GS_yellow;CON__P42212;CON__Q9U6Y5	569
FSVSPVVR	AT1G56070.1;AT3G12915.1	570
FTAFMGYK	AT1G43170.9;AT1G43170.8;AT1G43170.7;AT1G43170.6;AT1G43170.5;AT1G43170.3;AT1G43170.2;AT1G43170.1	571
FTDSSVQSDIK	AT3G09440.2;AT3G09440.1	573
FTDSSVQSDIKLWPFTLK	AT3G09440.2;AT3G09440.1	574
FTLPPNLTLK	AT3G14415.3;AT3G14415.1;AT3G14415.2	575
FTTVQFTGEVLK	AT1G76030.1;AT1G20260.1	576
FTVLVATDVASR	AT5G26742.1;AT5G26742.2;AT5G26742.3	577
FVDDPPTGLEK	AT1G44575.1;AT1G44575.2	578
FVESLGVEK	AT2G39730.2;AT2G39730.3;AT2G39730.1	579
FVEVDEEQTK	AT5G30510.1	580
FVFFNFQR	AT1G55670.1	581
FVIGGPHGDAGLTGR	AT3G17390.1;AT4G01850.2;AT4G01850.1;AT1G02500.2;AT1G02500.1;AT2G36880.2;AT2G36880.1	582
FVQAGSEVSALLGR	ATCG00480.1	583
FVTAVVGFGK	AT5G56670.1;AT4G29390.1;AT2G19750.1	584
FVYAHFPINASIGGDGK	AT1G33140.1;AT1G33120.1	585
FWEVICDEHGIDSTGR	AT1G20010.1	586
FWEVVCAEHGIDPTGR	AT5G62700.1;AT5G62690.1	587
FWEVVCDEHGIDPTGR	AT5G12250.1	588
FYGEVTQQMLK	AT1G32060.1	589
FYKEEEKNDPEFAK	AT3G12780.1	590
FYNVVVEELPSNVADLL	AT1G54270.1;AT1G54270.2;AT3G13920.1;AT3G13920.3;AT3G13920.4;AT1G72730.1	591
GADIPTYVMGVNEQDYGHDVANIISNASCTTNCLAPFAK	AT1G42970.1	592
GAGFGELSPHVFAIAEVAYR	AT5G20490.2;AT5G20490.1	594
GAIDSSAPAESK	AT3G62530.1	595
GAIIGDTIVSGTEVPIK	ATCG01310.1;ATCG00830.1	596
GAIILAK	AT2G41840.1;AT3G57490.1;AT1G59359.1;AT1G58983.1;AT1G58684.1;AT1G58380.1	597
GAPEQILDLANARPDLR	AT2G18960.1	598
GCFNELISLMESGLGLER	AT3G11130.1;AT3G08530.1	599
GDANDDEKFKIEEK	AT3G23900.3;AT3G23900.1	600
GDIPTYVVGVNADAYSHDEPIISNASCTTNCLAPFVK	AT3G26650.1	601
GDKAQFFSGGEEYDNGVDDIESPK	AT1G32230.1;AT1G32230.2;AT1G32230.3	602
GEDKEFSAEEISSMILIK	AT3G09440.2;AT3G09440.1	603
GEEKEFAAEEISSMVLIK	AT5G02500.1;AT5G02500.2	604
GEELFTGVVPILVELDGDVNGHK	CON__PSB_N_GS_green;CON__PSB_N_GS_yellow;CON__PSB_C_GS_green;CON__PSB_N_GFP;CON__PSB_C_GFP;CON__PSB_C_GS_yellow;CON__P42212;CON__Q9U6Y5	605
GEICDINGTCVDAAEDEFFR	AT4G04640.1	606
GERPAFTPQSGNFR	AT1G48920.1	607
GETQLYATIDLQK	AT3G15730.1	608
GEVGYPGGIFNPLNFAPTQEAK	AT3G47470.1	609
GFDASLSEDDIK	AT1G48920.1	610
GFFEVTHDISNLTCADFLR	AT4G35090.1;AT4G35090.2;AT1G20620.5;AT1G20620.1;AT1G20620.2	611
GFGFVTFKDEK	AT2G21660.2;AT2G21660.1	612
GFGHVEFASSEEAQK	AT1G48920.1	613
GFGIGPDGR	AT1G01090.1	614
GFGILDVGYR	AT5G23120.1	615
GFSSGSAVVSGGSR	CON__P35908	618
GFVQFCYEPIK	AT1G56070.1;AT3G12915.1	620
GGAIDDSVITK	AT1G11860.3;AT1G11860.2;AT1G11860.1	622
GGGGGGYGSGGSSYGSGGGSYGSGGGGGGGR	CON__P04264	623
GGGGSFGYSYGGGSGGGFSASSLGGGFGGGSR	CON__P35527	624
GGGLYLSK	AT5G23120.1	625
GGGQVIPTAR	AT1G56070.1	626
GGHVVEGLAGELEQLR	CON__PSB_N_GS_green;CON__PSB_N_GS_yellow;CON__PSB_C_GS_green;CON__PSB_C_GS_yellow;CON__PSB_C_SBP-HA;CON__PSB_C_SBP-Stag;CON__PSB_N_GS_TEV;CON__PSB_N_GS_rhino;CON__PSB_C_GS_TEV;CON__PSB_C_GS_rhino;CON__PSB_C_UBA-GS_rhino	627
GGIGVIQIDEAALR	AT5G17920.2;AT5G17920.1;AT3G03780.3;AT3G03780.2;AT3G03780.1	628
GGLDFTK	ATCG00490.1	629
GGLDFTKDDENVNSQPFMR	ATCG00490.1	630
GGLVALVEGLR	AT5G30510.1	631
GGNNILVICDTWTPAGEPIPTNKR	AT5G35630.3;AT5G35630.2;AT5G35630.1	632
GGPREPWHDIHSR	AT3G15730.1	633
GGSGGGGSISGGGYGSGGGSGGR	CON__P35908	634
GGSGGSHGGGSGFGGESGGSYGGGEEASGSGGGYGGGSGK	CON__P35527	635
GGSGGSYGGGGSGGGYGGGSGSR	CON__P35527	636
GGSPGDLFAVIEVIPDPVLK	AT4G39960.1	637
GHEAYQLEGEKK	AT1G63680.1	638
GHEGAVLAAR	AT5G64730.1	639
GHYLNATAGTCEEMIK	ATCG00490.1;ATMG00280.1	640
GHYLNATAGTCEEMIKR	ATCG00490.1;ATMG00280.1	641
GHYTEGAELIDAVLDVVR	AT1G20010.1;AT5G12250.1	642
GHYTEGAELIDAVLDVVRK	AT1G20010.1;AT5G12250.1	643
GHYTEGAELIDSVLDVVR	AT5G44340.1;AT5G62700.1;AT5G62690.1;AT2G29550.1	644
GHYTEGAELIDSVLDVVRK	AT5G44340.1;AT5G62700.1;AT5G62690.1;AT2G29550.1	645
GIDFKEDGNILGHK	CON__PSB_N_GS_green;CON__PSB_N_GS_yellow;CON__PSB_C_GS_green;CON__PSB_N_GFP;CON__PSB_C_GFP;CON__PSB_C_GS_yellow;CON__P42212;CON__Q9U6Y5	646
GIDLIAGGK	AT5G27850.1;AT3G05590.1	647
GIHIINLTR	ATCG00160.1	649
GILDVCDEPLVSVDFR	AT1G12900.4;AT1G12900.3;AT1G12900.1;AT1G12900.2;AT3G26650.1	651
GILGYTEDDVVSTDFVGDNR	AT1G13440.1;AT1G13440.2;AT3G04120.1	652
GIQEEQAVPAR	ATCG00190.1	655
GIQVQIAGR	ATCG00800.1	656
GISESTLK	AT1G65280.1	657
GISMAVDAVVTNLK	AT3G23990.1	658
GIVDSEDLPLNISR	AT5G56030.1;AT5G56010.1;AT5G56000.1;AT5G56030.2	660
GIYAYGFEKPSAIQQR	AT1G54270.1;AT3G13920.1;AT3G13920.3;AT3G13920.2;AT1G72730.1	661
GIYPAVDPLDSTSTMLQPR	ATCG00480.1	662
GKDLAELIAAGR	AT2G27710.4;AT2G27710.3;AT2G27710.2;AT2G27710.1;AT2G27720.1;AT2G27720.3;AT2G27720.2	663
GKDTIADIITSIR	ATCG00770.1	664
GKLNGIALR	AT1G42970.1;AT1G12900.4;AT1G12900.3;AT1G12900.1;AT1G12900.2;AT3G26650.1	665
GKLNSYESLELSR	AT3G11130.1;AT3G08530.1	666
GKPGYEHLCEPLHVLIEAELPEDIINSR	AT1G09660.1;AT1G09660.2	667
GLADENGLGSNSADDVTGPK	AT1G65280.1	668
GLAEEDKTAEHGVR	AT3G45140.1	669
GLAGSGNPAYPGGPFFNPLGFGKDEK	AT1G61520.2;AT1G61520.3;AT1G61520.1	670
GLAYDTSDDQQDITR	AT2G39730.2;AT2G39730.3;AT2G39730.1	672
GLCAIAQAESLR	AT2G31610.1;AT5G35530.1	673
GLCGGFNNFIIK	AT4G04640.1	674
GLDVIQQAQSGTGK	AT1G54270.1;AT1G54270.2;AT3G13920.1;AT3G13920.3;AT3G13920.4;AT3G13920.2;AT1G72730.1	675
GLFDFLGK	AT1G76180.2;AT1G76180.1;AT1G20440.1	677
GLFIIDKEGVIQHSTINNLGIGR	AT3G11630.1;AT5G06290.1	678
GLGLDSALEPR	AT5G67630.1	680
GLGLEYTVISVGK	AT4G04640.1	681
GLGLEYTVISVGKK	AT4G04640.1	682
GLHAGVEADVR	AT1G03910.1;AT1G03910.2	683
GLHAGVEADVRK	AT1G03910.1;AT1G03910.2	684
GLILSVR	AT3G11130.1;AT3G08530.1	685
GLMSFPLDGNNSTDFIEDWVK	AT5G14740.2;AT5G14740.1;AT5G14740.5;AT5G14740.4;AT5G14740.3;AT3G01500.1;AT3G01500.3;AT3G01500.2	686
GLNEGGDNVDAASSGK	AT5G16780.1	687
GLNLILVAR	AT1G67730.1	688
GLNQSELDDNDIEELMSQVR	AT1G32870.1;AT1G32870.2	689
GLTAEDVNEAFR	AT1G42970.1	690
GLTAEDVNEAFRK	AT1G42970.1	691
GMDVVDMGNPLSVPVGGATLGR	ATCG00480.1	692
GMLTGPVTILNWSFVR	AT5G17920.2;AT5G17920.1;AT3G03780.3;AT3G03780.2;AT3G03780.1;AT5G20980.2;AT5G20980.1	694
GMVDSVFQAPMGTGTHHAVLSSYEYVSQGLR	AT2G39730.2;AT2G39730.3;AT2G39730.1	695
GNASVPAMEMTK	AT5G17920.2;AT5G17920.1;AT3G03780.3;AT3G03780.2;AT3G03780.1	697
GNESYEDAIEALKK	AT5G14740.2	698
GNLDDSLEVK	AT3G13460.2;AT3G13460.4;AT3G13460.1;AT3G13460.3	699
GNLPGAENLVVQR	AT3G11130.1;AT3G08530.1	700
GNMQLFSVDQQR	AT3G11130.1;AT3G08530.1	701
GPAPLSLALAHADIDEAGK	AT4G03280.2;AT4G03280.1	702
GPILLEDYHLVEK	AT4G35090.1;AT4G35090.2	703
GPLENLADHLADPVNNNAWAFATNFVPGK	AT2G34420.1;AT2G34430.1	704
GPPALVFDFSQLEAK	AT2G21390.1	705
GPSGSPWYGSDR	AT2G34420.1;AT1G29930.1;AT1G29920.1;AT1G29910.1	706
GPSPVGWIGMPGLPNPPIVK	AT1G09660.1;AT1G09660.2	707
GPSPVGWIGMPGLPNPPIVKK	AT1G09660.1;AT1G09660.2	708
GPVGVEGLLTTR	AT2G39800.2;AT2G39800.3;AT2G39800.4;AT2G39800.1;AT3G55610.1	709
GPVLLEDYHLIEK	AT1G20620.5;AT1G20620.1;AT1G20620.2	710
GPYESGSGHSSGLGHR	CON__Q86YZ3	711
GQADTIGIAMR	ATCG00740.1	712
GQCDEELINVTNK	AT3G11130.1;AT3G08530.1	713
GQLKQAVQSMVQQAMQYIDQTPDIETR	AT5G09900.2;AT5G09900.1;AT5G09900.3	715
GQRMSKFQMANLTMEK	AT3G11890.1;AT3G11890.2	716
GRLSQEEIDR	AT5G28540.1;AT5G42020.1	717
GRPKAPQVYTIPPPK	CON__P01868;CON__P01869	718
GSAITGPIGK	AT3G04400.2;AT3G04400.1;AT2G33370.1;AT1G04480.1	719
GSCGIGGGIGGGSSR	CON__P02533;CON__P08779	720
GSDVHCILCPR	AT3G15730.1	721
GSGFVAVEIPFTPR	AT5G50920.1;AT3G48870.2;AT3G48870.1	722
GSGGLGGACGGAGFGSR	CON__P02538;CON__P04259	723
GSLGGGFSSGGFSGGSFSR	CON__P13645	724
GSSSGGGYSSGSSSYGSGGR	CON__P35908	726
GSTGQVLLQLLEMR	ATCG00380.1	727
GSVKDTVKEEK	AT1G09660.1;AT1G09660.2	728
GTDALAAALAHLSGFSQPPSSR	AT5G26742.1;AT5G26742.2;AT5G26742.3	730
GTEIVVCTPGR	AT1G20920.1;AT1G20920.2;AT3G09620.1	731
GTFYGKTEEKEPSK	AT2G39730.2	732
GTGFLDFLYSASDAFK	AT1G71500.1	733
GTGITEEFEEVPVQSR	AT5G23120.1	734
GTLDAVGVK	ATCG01230.1;ATCG00905.1;ATCG00065.1	735
GTMTTTHSYTGDQR	AT1G42970.1;AT1G12900.4;AT1G12900.3;AT1G12900.1;AT1G12900.2;AT3G26650.1	736
GTPFAAQTAAGNAIR	ATCG00750.1	737
GVAINFVTR	AT3G13920.1;AT3G13920.3;AT3G13920.4;AT3G13920.2	738
GVAPTEFEEQVTQALFDLENTNQELK	AT3G02560.2;AT3G02560.1	739
GVDLDALLDMSTDDLVK	AT1G04270.2;AT5G09510.1;AT1G04270.1;AT5G09500.1	741
GVDVVVGTPGR	AT5G26742.1;AT5G26742.2;AT5G26742.3	742
GVEDLADAVK	AT2G33210.2;AT2G33210.1;AT3G23990.1	743
GVEKDQVLLFAAMASR	AT4G30190.1;AT4G30190.2;AT2G18960.1	744
GVELSELDEQVAQAFFDLENTNQELK	AT1G48830.2;AT1G48830.1	745
GVLDLTEEILSR	AT2G04842.1	746
GVLNVVAVK	AT2G28000.1	748
GVLSELFQLHAFFPLNTN	ATCG00500.1	749
GVLTGEDAR	AT3G14415.3;AT3G14415.1;AT3G14415.2	751
GVNLQQNDVQR	AT3G51950.2;AT3G51950.1	752
GVPLEEFSVK	AT1G03910.1;AT1G03910.2	753
GVSQAGVQFYHDLIDELIK	AT3G09260.1	754
GVTAFGFDLVR	AT5G17920.2;AT5G17920.1;AT3G03780.3;AT3G03780.2;AT3G03780.1	755
GVVMNPVDHPHGGGEGR	ATCG01310.1;ATCG00830.1	756
GWVTLQLIR	AT5G26742.1;AT5G26742.2;AT5G26742.3	757
GYDPEVIDIR	AT2G34590.1;AT1G30120.1	759
GYEGVVTR	AT1G43170.9;AT1G43170.8;AT1G43170.7;AT1G43170.6;AT1G43170.5;AT1G43170.3;AT1G43170.2;AT1G43170.1;AT1G43170.4;AT1G61580.1	760
GYISPQFVTNPEK	AT2G28000.1	761
GYISPYFITDEK	AT3G13860.1	762
GYISPYFITNPK	AT2G33210.2;AT2G33210.1	763
GYISPYFVTDSEK	AT1G55490.2;AT1G55490.1;AT3G13470.1;AT5G56500.2;AT5G56500.1	764
GYMFTTTAER	AT5G09810.1;AT3G18780.2;AT1G49240.1;AT3G18780.1	765
GYTSPYFITNQK	AT3G23990.1	766
GYVSETESGKR	AT4G27440.2;AT4G27440.1	768
HAGVFIAK	AT5G52470.2;AT5G52470.1;AT4G25630.1	769
HAMVLGTSGDDKK	AT4G00090.1	770
HAQVPEEAR	AT5G50920.1	771
HATFVPHTAGR	AT3G11940.2;AT3G11940.1;AT2G37270.2;AT2G37270.1	772
HEEEMALLAR	AT1G03910.1;AT1G03910.2	773
HETCYQIALAIKDEVEDLEK	AT5G17920.2;AT5G17920.1;AT3G03780.3;AT3G03780.2;AT3G03780.1	774
HFLLDFLHMYR	AT2G35510.1	776
HGGGGGGFGGGGFGSR	CON__P35908	777
HGIICTEDLIHEILTVGPHFK	AT2G01250.1	778
HGSLGFLPR	AT1G43170.9;AT1G43170.8;AT1G43170.7;AT1G43170.6;AT1G43170.5;AT1G43170.3;AT1G43170.2;AT1G43170.1;AT1G61580.1	779
HGVQELEIELQSQLSK	CON__P35527	780
HGVQELEIELQSQLSKK	CON__P35527	781
HGYIGEFEYVDDHR	AT5G59850.1;AT1G07770.2;AT1G07770.1;AT3G46040.1	782
HHGVMVGMNQK	AT3G18780.2;AT1G49240.1;AT3G18780.1	783
HIDFALTSPFGGGRPGR	AT5G15200.1	784
HIEKDPALER	AT5G50920.1;AT3G48870.2;AT3G48870.1	785
HIETTLTR	AT4G24280.1;AT5G49910.1	786
HITLENNENKPVTNSR	AT3G13460.2;AT3G13460.4;AT3G13460.1;AT5G61020.2;AT5G61020.1	787
HKEHISAYGEGNER	AT5G35630.3;AT5G35630.2;AT5G35630.1;AT1G66200.1;AT1G66200.3	788
HLNLDFQLIKDPETGKK	AT1G33140.1;AT1G33120.1	790
HLSDPFGNNLLTVIAGTAER	AT4G10340.1	791
HLSDPFGNNLLTVIAGTAERAPTL	AT4G10340.1	792
HNEIQTANIK	AT3G15980.1;AT3G15980.4;AT3G15980.3;AT3G15980.2;AT1G52360.1;AT3G15980.5;AT1G52360.2	794
HNIEDGSVQLADHYQQNTPIGDGPVLLPDNHYLSTQSALSK	CON__PSB_N_GS_green;CON__PSB_C_GS_green;CON__PSB_N_GFP;CON__PSB_C_GFP;CON__P42212;CON__Q9U6Y5	795
HNSYTCEATHK	CON__P01837	796
HNSYTCEATHKTSTSPIVK	CON__P01837	797
HPGQEVFSGSTCK	AT4G30190.1;AT4G30190.2;AT2G18960.1	798
HQDNNYGGFQRQR	AT3G62330.1	799
HRENNQYFLILTLR	ATCG00770.1	800
HSLVSHLR	AT4G16990.1;AT4G16990.2	801
HTGVMVGMGQK	AT5G09810.1;AT3G53750.1;AT2G37620.2;AT2G37620.1;AT3G12110.1;AT5G59370.2;AT5G59370.1;AT3G46520.1	802
HTPGTFTNQMQTSFSEPR	AT1G72370.2;AT1G72370.1;AT3G04770.2;AT3G04770.1	803
HYSELPDIKR	AT3G11130.1;AT3G08530.1	805
IACYVTVR	AT5G45775.1;AT5G45775.2;AT4G18730.1;AT3G58700.1;AT2G42740.1	806
IAELSNEIK	AT5G41790.1	807
IAELSNEIQEAQNTMQELMSESGQLK	AT5G41790.1	808
IAGLEVLR	AT4G24280.1;AT5G49910.1	809
IAPEEHPVLLTEAPLNPK	AT3G18780.2;AT1G49240.1;AT3G18780.1	811
IAQAEAMAR	AT5G30510.1	813
IAQIIGPVLDVAFPPGK	ATCG00480.1	814
IAQIPVSEAYLGR	ATCG00120.1	815
IASGDVPETIEGK	AT5G50920.1;AT3G48870.2;AT3G48870.1	816
IASKLDAADKK	AT3G12580.1	817
IDGSDIVSEGPR	AT4G22890.4;AT4G22890.5;AT4G22890.3;AT4G22890.2;AT4G22890.1	818
IDGSERQNGVLNSWTDQDSK	CON__P01837	819
IDSWFGTR	AT1G33140.1;AT1G33120.1	820
IDVYFNEASGGK	AT5G44340.1	821
IDYCSYTVR	ATCG00800.1	822
IEDSIEQAIQWLEGNQLAEADEFEDKMK	AT5G02500.1;AT5G02500.2	823
IEDVTPIPTDSTR	AT2G36160.1;AT3G52580.1;AT3G11510.1	824
IEHFHVEDVKK	ATCG00740.1	825
IEISELNR	CON__P04264;CON__P35908	826
IEKHELVEMR	AT3G11130.1;AT3G08530.1	827
IEPVIPLLIPR	AT4G13770.1	828
IFEGEALLR	AT5G15200.1;AT5G15200.2;AT5G39850.1	829
IFEIDNDFSDLEK	ATCG00500.1	830
IFEPVLLLGK	AT5G18380.2;AT5G18380.1;AT5G18380.3;AT3G04230.1	831
IFIQTLIGR	ATCG00170.1	832
IFLENVIR	AT5G59970.1;AT5G59690.1;AT3G53730.1;AT3G46320.1;AT3G45930.1;AT2G28740.1;AT1G07820.2;AT1G07820.1;AT1G07660.1;AT1G07660.2	833
IFLIADDR	AT5G26742.1;AT5G26742.2;AT5G26742.3	834
IFLPDGLLDR	AT4G10340.1	835
IFNVLGEPVDNLGPVDTR	ATCG00480.1	836
IFVGGLPYYFTESQVR	AT4G36690.2;AT4G36690.4;AT4G36690.3;AT4G36690.1	837
IFVGGLPYYFTEVQIR	AT1G60900.1	838
IGADAIEVALK	AT5G18190.1;AT3G03940.1	839
IGDALHIGGGNK	AT1G54410.1	840
IGDMEGAAAIQR	AT5G53800.1	841
IGEKLPAADK	AT5G02490.1;AT5G02500.1;AT5G02500.2	842
IGEKLPAADKK	AT5G02490.1;AT5G02500.1;AT5G02500.2	843
IGGASEAEVGEK	AT3G23990.1	844
IGGASEAEVGEKK	AT3G23990.1	845
IGGASETEVSEK	AT2G33210.2;AT2G33210.1	846
IGGASETEVSEKK	AT2G33210.2;AT2G33210.1	847
IGGEILCYIW	ATCG00770.1	848
IGGIGTVPVGR	AT5G60390.3;AT5G60390.1;AT1G07940.2;AT1G07940.1;AT1G07930.1;AT1G07920.1;AT1G07930.2;AT5G60390.2	849
IGGVMIMGDR	AT5G45930.1;AT4G18480.1	850
IGINGFGR	AT1G13440.1;AT1G13440.2;AT3G04120.1	851
IGKPHTVPCK	AT2G41840.1;AT3G57490.1;AT1G59359.1;AT1G58983.1;AT1G58684.1;AT1G58380.1	852
IGLFGGAGVGK	ATCG00480.1;AT5G08690.1;AT5G08670.1;AT5G08680.1	853
IGNNEITILVNDAEK	ATCG00470.1	855
IGSEISSLTLEEAR	AT3G27850.1;AT3G27830.1	856
IGSTNITESIVK	ATCG00770.1	857
IGVIESLLEK	AT3G12780.1;AT1G56190.2;AT1G56190.1	858
IGVQIIQNALK	AT2G33210.2;AT2G33210.1;AT3G23990.1	859
IIAATIENAQPILQIDNAR	CON__P08779	860
IIDCGETSQIR	AT3G63400.2;AT3G63400.3;AT3G63400.1	861
IIDLIEGR	AT5G26742.1;AT5G26742.2;AT5G26742.3	862
IIGFDNTR	AT1G67090.1;AT5G38420.1;AT5G38410.1;AT5G38410.3;AT5G38410.2;AT5G38430.1	863
IIITTQDRR	AT3G04210.1	864
IINEPTAAAIAYGLDK	AT5G02490.1;AT1G56410.1;AT3G09440.2;AT3G09440.1;AT5G02500.1;AT5G02500.2;AT3G12580.1;AT1G16030.1;AT5G28540.1;AT5G42020.1;AT5G42020.2	865
IINEPTAAAIAYGLDKK	AT5G02490.1;AT1G56410.1;AT3G09440.2;AT3G09440.1;AT5G02500.1;AT5G02500.2;AT3G12580.1;AT1G16030.1;AT5G28540.1;AT5G42020.1;AT5G42020.2	866
IINEPTAASLAYGFDR	AT4G24280.1	867
IINEPTAASLAYGFER	AT5G49910.1	868
IIQVVSNR	AT3G26650.1	869
IITVCLEGLENILK	AT4G16143.2;AT4G16143.1;AT3G06720.2;AT3G06720.1	870
IIVICSNPR	ATCG00760.1	871
IKDEDIVTLVDQFPGQSIDFFGALR	AT2G39730.2;AT2G39730.3;AT2G39730.1	872
IKEWYEK	CON__P13645;CON__P02535	873
IKFEMEQNLR	CON__P35527	874
ILDILEKK	ATCG00740.1	876
ILGGIGIVILSTSQGIMTDR	ATCG00770.1	877
ILGPIIPWFLEK	AT1G53590.1	878
ILMVGLDAAGK	AT3G62290.3;AT3G62290.2;AT3G62290.1;AT2G47170.1;AT1G70490.3;AT1G70490.2;AT1G70490.1;AT1G23490.1;AT1G10630.1;AT5G14670.1	879
ILQAGVHVVVGTPGR	AT1G54270.1;AT1G54270.2;AT3G13920.1;AT3G13920.3;AT3G13920.4;AT3G13920.2	880
ILSLLPFLNNQK	ATCG00650.1	881
ILSQQISEMSIK	AT5G41790.1	882
ILTEVLLK	AT1G70620.2;AT1G70620.1;AT1G70620.3	883
ILVDYLQDK	AT3G27850.1;AT3G27830.1	884
ILVFVQSQEK	AT1G20920.1;AT1G20920.2	885
ILVSVEGANTK	AT1G70620.2;AT1G70620.1;AT1G70620.3	886
IMEADANSPYDVLGVNHNMAADNMK	AT1G65280.1	887
IMEIASLEK	AT5G27770.1;AT3G05560.3;AT3G05560.2;AT3G05560.1	888
IMGPNYIPGEK	AT1G56070.1	889
INELEQSINDLR	AT4G15802.1	890
INIVTEIVKEFELVYNK	AT4G09650.1	891
INVYYNEASCGR	AT5G62700.1;AT5G62690.1	893
INVYYNEASGGR	AT1G20010.1	894
IPATIITGFLGSGK	AT1G80480.1;AT1G15730.1	895
IPAVQDLVR	AT5G49910.1	896
IPAVQELVR	AT4G24280.1	897
IPHFNAPIYLENK	AT3G03920.1	899
IPSVFWVWK	ATCG00420.1	900
IQAGPADKPMIYVEYK	AT5G02500.1;AT5G02500.2	901
IQAGPADKPMIYVEYKGEEK	AT5G02500.1;AT5G02500.2	902
IQDKEGIPPDQQR	AT1G23410.1;AT3G62250.1;AT2G47110.2;AT2G47110.1;AT3G52590.1;AT2G36170.1;AT4G05050.4;AT2G35635.1;AT1G31340.1;AT4G05050.3;AT4G05050.2;AT4G05050.1;AT4G02890.2;AT4G02890.1;AT1G55060.1;AT4G05320.5;AT4G02890.4;AT4G02890.3;AT5G03240.3;AT5G03240.2;AT5G03240.1;AT1G65350.1;AT5G37640.1;AT4G05320.6;AT4G05320.3;AT4G05320.1;AT5G20620.1;AT4G05320.4;AT4G05320.2;CON__P62979	903
IQDWYDKK	CON__P35527	904
IQNAGTEVVDAK	AT3G47520.1	905
IQQTGADIVK	AT3G06350.1	906
IRDLYEQLIANK	AT1G32060.1	907
IREEYPDR	AT5G44340.1;CON__ENSEMBL:ENSBTAP00000025008;AT5G62700.1;AT5G62690.1;AT1G20010.1;AT2G29550.1;AT5G12250.1	908
IRLENEIQTYR	CON__P13645	909
IRPELLGTAK	AT3G13860.1	910
IRPPGFINLQILPELVK	ATCG01110.1	911
ISDKYWDFYSSESLEHDLPGHLLR	AT3G15730.1	913
ISETSDELER	AT5G41790.1	914
ISGLIYEETR	AT5G59970.1;AT5G59690.1;AT3G53730.1;AT3G46320.1;AT3G45930.1;AT2G28740.1;AT1G07820.2;AT1G07820.1;AT1G07660.1;AT1G07660.2	915
ISIGGGSCAISGGYGSR	CON__P02538;CON__P04259	916
ISISTSGGSFR	CON__P13647	917
ISNINAMVK	AT2G33210.2;AT2G33210.1	918
ISNPYGDPNILAEFIAGQLK	ATCG00800.1	919
ISPGSFFQYPLSGFR	AT1G09660.1;AT1G09660.2	920
ISSGMEGIAR	ATCG00800.1	921
ISSINSIVK	AT3G23990.1	922
ISSLAASVR	AT2G39800.2;AT2G39800.3;AT2G39800.4;AT2G39800.1;AT3G55610.1;AT3G55610.2	923
ISSVLAGGSCR	CON__P02533;CON__P08779	924
ISVLNDALK	AT5G59850.1;AT1G07770.2;AT1G07770.1	925
ITAELQAASSSDSK	AT5G14740.2;AT5G14740.1;AT5G14740.5;AT5G14740.4;AT5G14740.3	926
ITASDVETAAGIAPSK	AT3G25860.1	927
ITGMMPNQGFTDFDR	AT3G08620.1	928
ITITNDKGR	AT5G02490.1;AT1G56410.1;AT3G09440.2;AT3G09440.1;AT5G02500.1;AT3G12580.1	929
ITPSWVGFTDSER	AT5G28540.1;AT5G42020.1;AT5G42020.2	930
ITSFTNEMKWYATEK	AT4G33820.1	931
ITVTADGQFSK	AT5G27770.1;AT3G05560.3;AT3G05560.2;AT3G05560.1	932
ITVTADGQFSKR	AT5G27770.1;AT3G05560.3;AT3G05560.2;AT3G05560.1	933
IVASPYAK	AT1G34430.1	934
IVDNETISVDGK	AT1G42970.1	935
IVEFIAVLLK	AT2G28360.1;AT3G45190.1;AT1G07990.1	936
IVGEEHYETAQQVK	ATCG00480.1	937
IVIELFADVVPK	AT3G63400.2;AT3G63400.3;AT3G63400.1	938
IVLEMAGVENALGK	AT2G33800.1	939
IVMGLFGEVVPK	AT3G62030.3;AT3G62030.1;AT3G62030.2	940
IVNDGVTVAR	AT1G55490.2;AT1G55490.1;AT3G13470.1;AT5G56500.2;AT5G56500.1	941
IVPASGIEDGWMGLDIGPDSIK	AT3G12780.1	942
IVTIEYDPNR	ATCG01310.1;ATCG00830.1	945
IVVELNGR	AT5G59850.1;AT1G07770.2;AT1G07770.1;AT3G46040.1;AT2G39590.1	947
IVVVDSEMPSR	AT3G15730.1	948
IVWDSEVK	ATCG00470.1	949
IVYGADLAAFLQTFAK	AT3G25860.1	950
IWHHTFYNELR	AT5G09810.1;AT3G53750.1;AT2G37620.2;AT2G37620.1;AT2G42100.1;AT3G18780.2;AT1G49240.1;AT3G18780.1;AT3G12110.1;AT5G59370.2;AT5G59370.1;AT3G46520.1	951
KADIGIAVADATDAAR	AT4G30190.1;AT4G30190.2;AT3G47950.1;AT1G17260.1;AT3G42640.1;AT5G57350.2;AT5G57350.1;AT2G18960.1	953
KADQLHESVQR	AT5G20490.2;AT5G20490.1;AT5G20470.1	954
KAGGGEISQQQATFAQIAAIAAAAK	AT1G20920.1;AT1G20920.2	955
KAGVLVGTGMGGLTVFSEGVQNLIEK	AT5G46290.2;AT5G46290.1;AT5G46290.3	956
KANLQDLAALTGGEVITDELGMNLEK	AT3G23990.1	957
KANLQDLAALTGGEVITDELGMNLEKVDLSMLGTCK	AT3G23990.1	958
KASLDDLAVLTGAEVISEER	AT3G13860.1	959
KAVVIYVPFR	AT3G02560.2;AT3G02560.1	960
KDEGIDLLKDK	AT4G24280.1;AT5G49910.1	961
KDGEYEPAEKPDPDTDYMR	AT3G15730.1	962
KDSPLDIIAINDTGGVK	AT3G26650.1	964
KDSPLDVVVINDTGGVK	AT1G12900.4;AT1G12900.3;AT1G12900.1	965
KDSPLEVVVLNDSGGVK	AT1G42970.1	966
KDVDGAYMTK	CON__P04264	967
KFETLSYLPDLSDVELAK	AT5G38420.1;AT5G38410.1;AT5G38410.3;AT5G38410.2	968
KFETLSYLPDLSDVELAKEVDYLLR	AT5G38420.1;AT5G38410.1;AT5G38410.3;AT5G38410.2	969
KFETLSYLPDLTDSELAK	AT1G67090.1;AT1G67090.2	970
KFETLSYLPDLTDSELAKEVDYLIR	AT1G67090.1;AT1G67090.2	971
KFLVQLR	ATCG00120.1	972
KFNLNVQAVNVLLDNVR	AT3G11130.1;AT3G08530.1	973
KFVADGVFYAELNEVLTR	AT2G31610.1;AT5G35530.1	974
KFVESLGVEK	AT2G39730.2;AT2G39730.3;AT2G39730.1	975
KGEGMQLDQLIESISQSR	AT5G12230.1	976
KGELEADTDKLMR	AT3G59800.1	977
KGIHIINLTR	ATCG00160.1	978
KGSITSIQAVYVPADDLTDPAPATTFAHLDATTVLSR	ATCG00480.1	979
KGVAINFVTLDDQR	AT1G54270.1;AT1G54270.2	980
KGVAINFVTR	AT3G13920.1;AT3G13920.3;AT3G13920.4;AT3G13920.2	981
KGVVTLEEGK	AT1G55490.2;AT1G55490.1;AT3G13470.1;AT5G56500.2;AT5G56500.1	982
KHDDSSDSPAPVTTK	AT3G57150.1	983
KHIVGMTGDGVNDAPALK	AT4G30190.1;AT4G30190.2;AT2G07560.1;AT2G18960.1	984
KHPGNYTPYDSGR	AT2G35510.1	985
KIEDSIEQAIQWLEGNQLAEADEFEDK	AT5G02500.1;AT5G02500.2	987
KIEDSIEQAIQWLEGNQLAEADEFEDKMK	AT5G02500.1;AT5G02500.2	988
KISNINAMVK	AT2G33210.2;AT2G33210.1	989
KKFETLSYLPDLTDSELAK	AT1G67090.1;AT1G67090.2	990
KLADNCTGLQGFLVFNAVGGGTGSGLGSLLLER	AT4G14960.2;AT1G50010.1;AT1G04820.1;AT4G14960.1;AT1G64740.1;AT5G19780.1;AT5G19770.1	992
KLASLADLYVNDAFGTAHR	AT3G12780.1;AT1G56190.2;AT1G56190.1	993
KLAVNLIPFPR	AT5G44340.1;AT5G62700.1;AT5G62690.1;AT1G20010.1;AT2G29550.1;AT5G12250.1	994
KLDEEVEKR	AT1G20920.1	995
KLEWYEK	AT5G66470.1	996
KLLEGEECR	CON__P35908;CON__Q01546;CON__Q6NXH9;CON__P02538;CON__O95678;CON__P04259;CON__P13647	997
KLNLPILPTTTIGSFPQTVELR	AT5G17920.2;AT5G17920.1;AT3G03780.3;AT3G03780.2;AT3G03780.1	998
KLRVEAIGETDVYK	AT1G32870.1;AT1G32870.2	999
KMEKLNNIFFTLMAR	AT3G49100.1	1000
KMFAVGTASLGHVPVLDVGR	AT1G32230.1;AT1G32230.2;AT1G32230.3	1001
KNEAAATTLNR	AT5G23080.2;AT5G23080.1	1002
KPGGVIALLDEACMFPK	AT5G20490.2;AT5G20490.1	1003
KPLFFYVNLAK	AT2G34160.1;AT1G29250.1;AT3G04620.1	1004
KQDITITGASTLPKDEVDQMVQEAER	AT4G24280.1	1005
KSIYGVGIHLTAADCPYFSAR	AT1G32230.1;AT1G32230.2;AT1G32230.3	1006
KSNQVKQR	AT4G19570.1	1007
KSQYLDDIAILTGATVIR	AT1G55490.2;AT1G55490.1;AT3G13470.1	1008
KSVQENDAFMTEK	AT5G28530.1	1009
KTFAEEVNAAFR	AT1G12900.4;AT1G12900.3;AT1G12900.1;AT1G12900.2;AT3G26650.1	1010
KTLVFHR	AT1G32870.1;AT1G32870.2	1011
KVDWLTDK	AT1G54270.1;AT1G54270.2;AT3G13920.1;AT3G13920.3;AT3G13920.4;AT3G13920.2;AT1G72730.1	1012
KVEEEKPEEEEPSEK	AT3G05060.1	1013
KVEMLDGVTIVR	AT1G33140.1;AT1G33120.1	1014
KVLNKPVEIQVGGR	AT1G20920.1;AT1G20920.2;AT3G09620.1	1015
KVLQFAGIDDVFTSSR	AT2G41840.1;AT3G57490.1;AT1G59359.1;AT1G58983.1;AT1G58684.1;AT1G58380.1	1016
KVSEEDYVK	AT5G17920.2;AT5G17920.1	1017
KVSGEVPWFGIEQEYTLLQQNVK	AT5G35630.3;AT5G35630.2;AT5G35630.1	1018
KVVISAPSK	AT1G13440.1;AT1G13440.2;AT3G04120.1	1019
KVVISAPSKDAPMFVVGVNEHEYK	AT1G13440.1;AT3G04120.1	1020
KYASSSWCLNELALIMK	AT3G04210.1	1021
KYEDEINKR	CON__P35908;CON__Q01546	1023
KYIEAGVSEHAK	AT1G15690.1	1025
KYSEGLEEDKK	ATCG00800.1	1026
KYTEVKPALK	AT5G17920.2;AT5G17920.1;AT3G03780.3;AT3G03780.2;AT3G03780.1	1027
LAAAYQEAQQK	AT3G13460.2;AT3G13460.4;AT3G13460.1;AT3G13460.3	1028
LAADDFR	CON__P13645;CON__P02535;CON__Q148H6;CON__Q7Z3Y7;CON__P05784;CON__Q2M2I5;CON__Q14525;CON__P02534;CON__Q61765;CON__Q15323;CON__Q92764;CON__Q14532;CON__O76014;CON__Q497I4;CON__O76015;CON__O76013;CON__P02533;CON__Q6IFX2;CON__P19012;CON__P08727;CON__P19001;CON__Q04695;CON__Q9QWL7;CON__P08779;CON__Q9Z2K1;CON__Q3ZAW8	1029
LADLVGVTLGPK	AT1G55490.2;AT1G55490.1;AT3G13470.1;AT5G56500.2;AT5G56500.1	1030
LAEEGKLDPVVGR	AT5G50920.1;AT3G48870.2;AT3G48870.1	1031
LAELSEK	AT3G12780.1	1032
LAEQAERYEEMVEFMEK	AT5G38480.2;AT5G38480.1;AT1G78300.1;AT3G02520.1;AT4G09000.1;AT1G35160.1;AT5G16050.1;AT1G35160.2;AT4G09000.2	1033
LAIFTALAFSQK	AT5G36230.1;AT1G65220.1	1035
LALDLEIATYR	CON__P04264	1036
LALDVEIATYR	CON__P35908;CON__Q01546;CON__Q5XKE5;CON__P02538;CON__O95678;CON__P04259;CON__P13647	1037
LALFALR	AT3G62530.1	1038
LAMVLFDIPDIR	AT3G58140.1	1039
LANPTFGDLNHLISATMSGVTCCLR	AT5G44340.1	1040
LANQWLTMALMGGFAR	ATCG00470.1	1041
LANSVDVGSLRDPQEDSVR	AT5G13430.1;AT5G13440.1	1042
LASLADLYVNDAFGTAHR	AT3G12780.1;AT1G56190.2;AT1G56190.1	1043
LASYLDK	CON__P13645;CON__P05784;CON__Q99456;CON__P35527;CON__P02533;CON__P19012;CON__P08727;CON__P19001;CON__Q04695;CON__Q9QWL7;CON__P08779	1044
LASYLDKVQALEEANNDLENK	CON__P35527	1045
LASYLDKVR	CON__P13645;CON__Q99456;CON__P02533;CON__P19012;CON__P08727;CON__P19001;CON__Q04695;CON__Q9QWL7;CON__P08779	1046
LATSAVVLAASLATGYGLGLR	AT1G06950.1	1047
LATSGANFAR	AT5G64040.1;AT5G64040.2	1048
LAVDTVVTNLQSR	AT2G33210.2;AT2G33210.1	1049
LAVLNVADNR	AT3G20820.1	1050
LAVLQFYK	AT1G23410.1;AT3G62250.1;AT2G47110.2;AT2G47110.1	1051
LAVNLIPFPR	AT5G44340.1;AT5G62700.1;AT5G62690.1;AT1G20010.1;AT2G29550.1;AT5G12250.1	1052
LAVNTIGSLVR	AT1G74470.1	1053
LCGHSFILDFLHMQR	AT1G32230.1;AT1G32230.2;AT1G32230.3	1055
LCLLLNVIDPK	AT5G45930.1;AT4G18480.1	1056
LCQLLEQHPKLMQMLQEK	AT3G05680.1;AT3G05680.2	1057
LDAIIADGDVK	AT5G07220.1	1059
LDAMDAETAEKR	AT5G60790.1	1060
LDCPAIGK	AT5G49910.1	1061
LDEMIVFR	AT5G50920.1;AT3G48870.2;AT3G48870.1	1062
LDEVGAIR	AT5G12230.1	1063
LDIAQER	AT1G48920.1	1064
LDINQQYR	AT5G02700.1	1065
LDLEGWSMMQAEENCHLQR	AT1G09660.1;AT1G09660.2	1066
LDPAVGVNANSGK	AT1G70620.2;AT1G70620.1;AT1G70620.3	1067
LDSELKNMQDMVEDYR	CON__P04264	1068
LDSIGLENTEANR	AT4G38970.1;AT4G38970.2	1069
LDVPVDKYPSYNFVGR	AT1G09660.1;AT1G09660.2	1070
LEESLEKR	AT5G26742.1;AT5G26742.2	1071
LEGDRESTLGFVDLLR	ATCG00490.1	1072
LEGDRESTLGFVDLLRDDYVEK	ATCG00490.1	1073
LEGPIAWDVMYNFEQR	AT3G15730.1	1074
LEHAVHFLESLLK	AT1G09660.1;AT1G09660.2	1075
LEHAVHFLESLLKPMDESMDHYK	AT1G09660.1	1076
LEHAVHFLESLLKPMDESMDHYKR	AT1G09660.1	1077
LEIDVNGGETPR	AT1G32230.1;AT1G32230.2;AT1G32230.3	1078
LEILGDR	AT5G03100.1	1079
LEIPVDNYPNFNFVGR	AT2G38610.2;AT2G38610.1	1080
LEKEIETYHNLLEGGQEDFESSGAGK	CON__P35527	1081
LENEIQTYR	CON__P13645;CON__P02535	1082
LEQEIATYR	CON__P02533;CON__Q6IFX2;CON__P19012;CON__P08727;CON__P19001;CON__Q61782;CON__P35900;CON__Q9D312;CON__Q8N1A0;CON__Q04695;CON__Q9QWL7;CON__P08779;CON__Q9Z2K1;CON__Q3ZAW8	1083
LEQIYLHSLPVK	AT1G59359.1;AT1G58983.1;AT1G58684.1;AT1G58380.1	1084
LETLCDLYETLAITQSVIFVNTR	AT1G54270.1;AT1G54270.2;AT3G13920.1;AT3G13920.3;AT3G13920.4;AT3G13920.2;AT1G72730.1	1085
LETYLGGIK	ATCG00160.1	1086
LEVLFQGPLEVLFQGPENLYFQGAIPGTTENLYFQGELK	CON__PSB_N_GS_green;CON__PSB_N_GS_yellow;CON__PSB_C_CSFH	1087
LEYNYNSHNVYIMADK	CON__PSB_N_GS_green;CON__PSB_N_GS_yellow;CON__PSB_C_GS_green;CON__PSB_N_GFP;CON__PSB_C_GFP;CON__PSB_C_GS_yellow;CON__P42212;CON__Q9U6Y5	1088
LEYNYNSHNVYIMADKQK	CON__PSB_N_GS_green;CON__PSB_N_GS_yellow;CON__PSB_C_GS_green;CON__PSB_N_GFP;CON__PSB_C_GFP;CON__PSB_C_GS_yellow;CON__P42212;CON__Q9U6Y5	1089
LFDIIDAR	AT1G69730.1	1090
LFIQIIDPADEDKFDFDPLDVTK	AT4G35090.1;AT4G35090.2	1091
LFIQTMDPADEDKFDFDPLDVTK	AT1G20620.5;AT1G20620.1;AT1G20620.2;AT1G20620.4	1092
LFLLSEIMADTVR	AT1G02080.2;AT1G02080.1	1093
LFNCVQR	AT1G65820.1;AT1G65820.2;AT1G65820.3	1094
LGADIVQK	AT2G28000.1	1095
LGANFFR	AT1G62750.1	1096
LGDIIPADAR	AT4G30190.1;AT4G30190.2;AT2G24520.1;AT1G17260.1;AT3G60330.2;AT3G60330.1;AT5G57350.2;AT5G57350.1;AT2G18960.1	1097
LGDLFYR	AT1G78900.2;AT1G78900.1	1098
LGEDNINVVEGNEQFISASK	CON__P00760	1099
LGEFSPTINFR	ATCG00820.1	1100
LGEIEEFILMPNVANLQHVGDR	AT3G11130.1;AT3G08530.1	1101
LGFDEGKDIVVSVMSSMGEEQICAVK	AT1G26630.1	1102
LGHNFVGTEQILLGLIGEGTGIAAK	AT5G50920.1;AT3G48870.2;AT3G48870.1	1103
LGIHEDSQNR	AT5G56030.1;AT5G56010.1;AT5G56000.1;AT5G56030.2;AT5G52640.1	1104
LGIQSFQPILVEGR	ATCG00180.1	1105
LGMALTIPQAR	ATCG00380.1	1107
LGPFLQVMPNCCR	AT1G09660.1;AT1G09660.2	1108
LGPFMQVLPICSR	AT3G08620.1	1109
LGPNYLQLPVNAPK	AT4G35090.1;AT4G35090.2;AT1G20630.1;AT1G20620.5;AT1G20620.1;AT1G20620.2;AT1G20620.4	1110
LHFFMVGFAPLTSR	AT5G44340.1;AT5G62700.1;AT5G62690.1;AT1G20010.1;AT2G29550.1;AT5G12250.1	1112
LHLQQQFLSQIFNQK	AT3G04210.1	1113
LIAGDFLESLGK	AT5G23080.2;AT5G23080.1	1115
LIESPAPGIISR	ATCG00120.1	1116
LIGLVTSR	AT2G39800.2;AT2G39800.3;AT2G39800.4;AT2G39800.1;AT3G55610.1;AT3G55610.2	1118
LIIPFEMRGYQGVYNLENK	AT2G20410.1	1119
LIITIQK	AT5G22450.1	1120
LIKPDLGR	AT5G65010.1;AT5G65010.2	1121
LINLALPR	AT4G01310.1	1122
LISQIISSLTTSLR	AT5G19780.1;AT5G19770.1	1123
LITELIGSPDDSSLGFLR	AT1G01560.2;AT4G01370.1	1124
LITLPEGSQA	AT4G22890.4;AT4G22890.5;AT4G22890.3;AT4G22890.2;AT4G22890.1	1125
LIVAGASAYAR	AT4G37930.1;AT5G26780.1;AT5G26780.3;AT5G26780.2	1126
LIYDDLVGR	AT1G44910.2;AT1G44910.1	1127
LKEEMVYLYK	AT5G53800.1	1128
LKEEQEAFKVELR	AT1G65280.1	1129
LKEGIPELSMEDYFSK	AT1G79200.1	1130
LKGKPGYEHLCEPLHVLIEAELPEDIINSR	AT1G09660.1;AT1G09660.2	1132
LKLELAQFAELEAFSQFSSDLDKATQNQLAR	ATCG00120.1	1133
LKSAASLNSR	CON__P00760	1134
LKYENEVALR	CON__P13645	1135
LLALMGMPFR	AT4G01310.1	1136
LLAVEGCAALGK	AT1G13320.2;AT3G25800.2;AT3G25800.1;AT1G13320.3;AT1G13320.1;AT1G25490.1	1137
LLDASHR	AT1G42970.1;AT1G12900.4;AT1G12900.3;AT1G12900.1;AT1G12900.2;AT3G26650.1	1138
LLDGDPLKIDQSALTGESLPVTK	AT1G80660.2;AT1G80660.1	1139
LLDTFYQIR	AT4G31490.1;AT4G31480.2;AT4G31480.1	1140
LLEGDPLKVDQSALTGESLPVTK	AT4G30190.1;AT4G30190.2;AT2G18960.1	1141
LLEGEDAHLSSQQASGQSYSSR	CON__P08779	1142
LLEGEDAHLSSSQFSSGSQSSR	CON__P02533;CON__Q61782	1143
LLEGEECR	CON__P35908;CON__Q01546;CON__Q6NXH9;CON__P02538;CON__O95678;CON__P04259;CON__P13647	1144
LLELLGEWSEK	AT1G20920.1;AT1G20920.2	1145
LLEPVYMVEIQAPEGALGGIYSVLNQK	AT1G56070.1;AT3G12915.1;AT3G12915.2	1146
LLEQDDCNFGFDAAK	AT3G13860.1	1147
LLEQDNPDLGYDAAK	AT2G33210.2;AT2G33210.1;AT3G23990.1	1148
LLEQDNPDLGYDAAKGEYVDMIK	AT2G33210.2;AT2G33210.1	1149
LLEQDNPDLGYDAAKGEYVDMVK	AT3G23990.1	1150
LLEYDADR	AT3G57150.1	1151
LLGGLAVR	AT2G31610.1;AT5G35530.1	1152
LLIEDKPR	ATCG00800.1	1153
LLILALER	AT4G38780.1;AT1G80070.1	1154
LLILTDPR	AT1G72370.2;AT1G72370.1;AT3G04770.2;AT3G04770.1	1155
LLLDDLKK	AT4G27440.2;AT4G27440.1	1157
LLLDLGNLVIR	AT4G17140.1;AT4G17140.2;AT4G17140.3	1158
LLNHEIR	AT1G09660.1;AT1G09660.2	1159
LLNHEIRR	AT1G09660.1;AT1G09660.2	1160
LLNQEIFR	AT3G08620.1	1161
LLNQEILR	AT5G56140.1	1162
LLNQEMFR	AT2G38610.2;AT2G38610.1	1163
LLTFAGPR	AT4G35250.1	1164
LLVVTDGTLR	AT3G54090.1	1165
LMEYGNMLVMEQENVK	AT2G39730.2;AT2G39730.3;AT2G39730.1	1166
LMEYGNMLVMEQENVKR	AT2G39730.2;AT2G39730.3;AT2G39730.1	1167
LMIPGLLR	AT3G57150.1	1168
LMNQEILR	AT4G26480.1	1169
LNDLEDALQQAK	CON__P04264	1170
LNDLEDALQQAKEDLAR	CON__P04264	1171
LNGCPIELFQPEILR	AT5G18380.2;AT5G18380.1;AT5G18380.3;AT2G09990.1	1172
LNGIALR	AT1G42970.1;AT1G12900.4;AT1G12900.3;AT1G12900.1;AT1G12900.2;AT3G26650.1	1173
LNIAITR	ATCG00800.1	1174
LNLINSTYK	ATCG00130.1	1175
LNLPILPTTTIGSFPQTVELR	AT5G17920.2;AT5G17920.1;AT3G03780.3;AT3G03780.2;AT3G03780.1	1176
LNVRPSI	AT4G35090.1;AT1G20620.5;AT1G20620.1;AT1G20620.4	1177
LNYEKPMPIQTQALPIIMSGR	AT1G20920.1;AT1G20920.2	1178
LPADTSGVK	AT3G52220.1	1179
LPDARPLINVCDR	AT3G11130.1;AT3G08530.1	1180
LPIIFVVENNLWAIGMSHLR	AT1G01090.1	1181
LPLFGCTDSAQVLK	AT1G67090.1;AT5G38420.1;AT5G38410.1;AT5G38410.3;AT5G38410.2;AT5G38430.1	1182
LPLQDVYK	AT5G60390.3;AT5G60390.1;AT1G07940.2;AT1G07940.1;AT1G07930.1;AT1G07920.1;AT1G07930.2;AT5G60390.2	1183
LPTANFDQK	AT3G23990.1	1184
LQDWYNPGSMGK	AT1G61520.2;AT1G61520.3;AT1G61520.1	1186
LQGEIAHVK	CON__P35908	1187
LQGEIAHVKK	CON__P35908	1188
LQGIVSWGSGCAQK	CON__P00760	1189
LQIFGPNKLEEK	AT5G57350.2;AT5G57350.1	1191
LQNVPPPNGQCQIPDKR	AT1G32230.1;AT1G32230.2;AT1G32230.3	1193
LQQFQGAVDAAR	AT3G11130.1;AT3G08530.1	1194
LQVEEANAAVIR	AT5G20490.2;AT5G20490.1	1197
LQYFHVEEDR	AT3G15730.1	1198
LQYFHVEEDRNWNMGIK	AT3G15730.1	1199
LQYLLGIDDSTATALR	AT1G06950.1	1200
LRAEIDNVKK	CON__P13647	1201
LRDLSDIIITPSPVMFQEDHDVWNVQLFR	AT3G15730.1	1202
LRELHTLK	AT4G30190.1;AT4G30190.2;AT3G47950.1;AT3G42640.1;AT5G57350.2;AT5G57350.1;AT2G18960.1	1203
LRLEIDVNGGETPR	AT1G32230.1;AT1G32230.2;AT1G32230.3	1204
LRSEIDHVK	CON__P02538;CON__P04259	1206
LRSEIDNVK	CON__P04264	1207
LRSEIDNVKK	CON__P04264	1208
LRVEAIGETDVYK	AT1G32870.1;AT1G32870.2	1209
LRVEAIGETDVYKFDPEELPEK	AT1G32870.1;AT1G32870.2	1210
LRVEDALNATK	AT1G55490.2;AT1G55490.1;AT3G13470.1;AT5G56500.2;AT5G56500.1	1211
LRVELAHGGR	AT1G02840.2;AT1G02840.3;AT1G02840.1;AT3G49430.2;AT3G49430.3;AT3G49430.1	1212
LSDELAEDLFR	AT1G06950.1	1213
LSDSLSETYHNSIIQMPK	AT5G37280.1	1214
LSEKEAEAASLAEDAQQK	AT3G46780.1	1215
LSELETQLK	AT5G41790.1	1216
LSELLGIEVTK	AT3G12780.1	1217
LSFKDIDEVILVGGSTR	AT4G24280.1;AT5G49910.1	1218
LSFLYLITGNLDK	AT2G21390.1;AT1G62020.1	1219
LSGGDHIHAGTVVGK	ATCG00490.1	1220
LSGGLGAGSCR	CON__Q04695	1221
LSGGVAVFK	AT3G13860.1	1222
LSGGVAVLK	AT2G33210.2;AT2G33210.1;AT3G23990.1	1223
LSGTPGMTMDWQGAPGSPSSYTVK	AT2G38610.2;AT2G38610.1	1224
LSIFETGIK	ATCG00480.1	1225
LSKDEIEK	AT3G09440.2;AT3G09440.1;AT5G02500.1	1227
LSKEEIEK	AT3G12580.1;AT1G16030.1	1228
LSLVDHSK	AT1G20920.1;AT1G20920.2;AT3G09620.1	1229
LSNLPNAEGNLIAK	AT1G32230.1;AT1G32230.2;AT1G32230.3	1230
LSNSESEIQVLR	AT5G20490.2;AT5G20490.1;AT5G20470.1	1231
LSNSLVQAVALLR	AT1G06950.1	1232
LSQEEIDR	AT5G28540.1;AT5G42020.1	1233
LSTANFDQK	AT2G33210.2;AT2G33210.1	1234
LSTPSFGDLNHLISATMSGVTCCLR	AT2G29550.1	1235
LSTPSFGDLNHLISATMSGVTCSLR	AT1G20010.1	1236
LSVDKNLVEVFCK	AT4G30190.1;AT4G30190.2;AT2G18960.1	1237
LSVDYGKK	AT4G14960.2;AT1G50010.1;AT1G04820.1;AT4G14960.1;AT5G19780.1;AT5G19770.1	1238
LSVVPVRR	AT2G41840.1;AT1G59359.1;AT1G58983.1;AT1G58684.1;AT1G58380.1	1239
LSYLHEPGVLNNLAMR	AT5G20490.2;AT5G20490.1	1240
LTDTQLAEVR	AT4G09650.1	1241
LTEAQAELR	AT1G65280.1	1242
LTEGCSFR	AT2G45710.1;AT3G61110.1	1243
LTGMSFR	AT1G13440.1;AT1G13440.2;AT3G04120.1	1244
LTGMSFRVPTVDVSVVDLTVR	AT1G13440.1;AT1G13440.2;AT3G04120.1	1245
LTGSEVLDKDAVK	AT1G32230.1;AT1G32230.2;AT1G32230.3	1246
LTGSEVLDKDAVKK	AT1G32230.1;AT1G32230.2;AT1G32230.3	1247
LTIIEEAR	AT5G07090.2;AT2G17360.1;AT5G58420.1;AT5G07090.1	1248
LTLIALR	AT4G35250.1	1249
LTLPVTPGSK	AT3G55360.1	1250
LTNIEGFEPNQK	AT2G43030.1	1251
LTPFMQVLPICSR	AT2G38610.2;AT2G38610.1	1252
LTQDGCIVCPSTDSTFDLR	AT1G71500.1	1253
LTTPSFGDLNHLISATMSGVTCCLR	AT5G62700.1;AT5G62690.1;AT5G12250.1	1254
LTYYTPEYETK	ATCG00490.1	1255
LVAAGHIK	AT2G41840.1	1256
LVAMSQLR	AT1G06950.1	1257
LVELLQHQSPSVLIPALR	AT4G16143.2;AT4G16143.1	1258
LVFAICEGR	ATCG00160.1	1259
LVFDEIFKEGDLVDVAGTTIGK	AT2G43030.1	1260
LVGEYGLR	AT5G15200.1;AT5G15200.2;AT5G39850.1	1261
LVLGELQTPFVR	AT2G21390.1;AT1G62020.1	1262
LVSQVISSLTASLR	AT4G14960.2;AT1G50010.1;AT1G04820.1;AT4G14960.1	1263
LVSWYDNEWGYSSR	AT1G13440.1;AT1G13440.2;AT3G04120.1	1264
LVVHITK	AT2G39730.2;AT2G39730.3;AT2G39730.1	1265
LVVIVDVVDQNR	AT4G27090.1;AT2G20450.1	1266
LWGENFFDPATR	AT1G56070.1	1267
LYAIATTSTSK	AT5G26742.1;AT5G26742.2;AT5G26742.3	1268
LYAPESAPALALNAQIEK	AT1G31330.1	1269
LYDDLNAGFR	AT1G78900.2;AT1G78900.1	1270
LYMEARPMEEGLAEAIDDGR	AT1G56070.1	1271
MAFFDPSRPQDFLFISGTK	AT3G22890.1	1273
MAHPDGEYATAR	AT3G14415.3;AT3G14415.1;AT3G14415.2	1274
MAIMEMKAVKGK	AT5G20310.1	1275
MASLKMIGK	AT3G52390.2	1276
MCCLFINDLDAGAGR	AT2G39730.2;AT2G39730.3;AT2G39730.1	1277
MDKNSIDDVVLVGGSTR	AT3G09440.2;AT3G09440.1	1278
MDKSTVHDVVLVGGSTR	AT5G02500.1;AT5G02500.2	1279
MEAIDELSQLSDSMR	AT1G59610.1	1281
MEGKEEDVR	AT2G45960.2;AT2G45960.1;AT2G45960.3;AT4G00430.2;AT3G61430.2;AT3G61430.1;AT1G01620.1;AT4G00430.1	1282
MEITNVTEYDAIAK	AT3G14415.3;AT3G14415.1;AT3G14415.2	1283
MELIDAAFPLLK	AT1G04410.1	1284
MERIERQR	AT1G29570.1	1286
MESGAGFVAMEER	AT1G09660.1;AT1G09660.2	1287
MFAVGTASLGHVPVLDVGR	AT1G32230.1;AT1G32230.2;AT1G32230.3	1288
MFDMGFEPQITR	AT1G20920.1;AT1G20920.2;AT3G09620.1	1289
MFDTAALAALLK	AT4G02510.1	1290
MFSAQHK	AT1G48830.2;AT1G48830.1	1291
MFVLDEADEMLSR	AT1G54270.1;AT1G54270.2;AT3G13920.1;AT3G13920.3;AT3G13920.4;AT3G13920.2;AT1G72730.1	1292
MGGTTQYTVNNQMVNATLMNIADNPTNVQLPGMYNKEENAR	AT2G39730.2;AT2G39730.3;AT2G39730.1	1293
MGINPIMMSAGELESGNAGEPAK	AT2G39730.2;AT2G39730.3;AT2G39730.1	1294
MHNIMLDEQYNAK	AT5G11400.1	1295
MIDDGQAVDIK	AT1G65280.1	1296
MIDILCTSSGK	AT1G20920.1;AT1G20920.2;AT3G09620.1	1297
MIGIWGPPGIGK	AT3G04210.1;AT3G44480.1;AT2G14080.1;AT3G44670.2;AT3G44670.1;AT3G25510.1	1298
MISTSEEIAQVGTISANGDREIGELIAK	AT2G33210.2;AT2G33210.1	1299
MITGDQLAIGK	AT4G30190.1;AT4G30190.2;AT2G24520.1;AT3G47950.1;AT2G07560.1;AT2G18960.1;AT1G80660.2;AT1G80660.1	1300
MIVDEGSEGFGFTK	AT1G71500.1	1301
MKELESICNPIIAK	AT3G09440.2;AT3G09440.1;AT5G02500.1;AT5G02500.2	1302
MKNSKLQNLWQGNQPLGNLK	AT5G38350.1	1303
MLAVLEQNILWVNPDCGLK	AT5G17920.2;AT5G17920.1;AT3G03780.3;AT3G03780.2;AT3G03780.1	1304
MLDFDFLCGR	AT5G49460.1;AT3G06650.1	1305
MLDMGFEPQIR	AT3G58510.3;AT3G58510.2;AT3G58510.1;AT2G42520.1;AT3G58570.1;AT5G63120.1;AT5G63120.2;AT3G01540.1;AT3G01540.4;AT3G01540.3;AT3G01540.2;AT5G14610.2;AT5G14610.1;AT3G06480.1	1306
MLFDIQK	AT1G54270.1;AT1G54270.2;AT3G13920.1;AT3G13920.3;AT3G13920.4	1307
MLGAAMGSYTSIDQGLYAVLGAAALMAGSMR	AT3G27170.1	1308
MLVEELADMSK	AT4G39960.1	1309
MLYLDLNDVR	AT3G04210.1	1310
MMEGIVATSYSPGDKFFIDPYK	AT3G03920.1	1311
MMLTFSVFPSPK	AT5G62700.1;AT5G62690.1;AT1G20010.1;AT5G12250.1	1313
MMMTFSVFPSPK	AT5G44340.1;AT2G29550.1	1314
MPNIYNALVVK	ATCG00480.1	1316
MPSAVGYQPTLSTEMGTLQER	ATCG00480.1	1317
MPTGEINKQQQPRSPR	AT1G05910.1	1318
MPTLEEYGTNLTK	AT5G50920.1;AT3G48870.2;AT3G48870.1	1319
MQLGMSSTKMK	AT4G28556.1	1320
MRTEGFTNEAVKMFDALSK	AT5G03560.2	1321
MSAAYKLMIMSR	AT1G29740.1	1322
MSAMSSASDNASDLKK	AT4G04640.1	1323
MSGECAPNVSVSVSTSHTTISGGGSR	CON__P04264	1324
MSLWYEHLGMLDETFLDPSSLECIEK	AT3G15730.1	1325
MSNNFEDR	ATCG00740.1	1326
MSTGCLSCFKVMCFK	AT5G22530.1	1327
MSVEFDNCK	AT1G55490.2;AT1G55490.1	1328
MTLDDFR	CON__P35527	1329
MTLQQILAR	AT5G67030.2;AT5G67030.1	1330
MTPTKPMVVETFSEYPPLGR	AT5G60390.3;AT5G60390.1;AT1G07940.2;AT1G07940.1;AT1G07930.1;AT1G07920.1;AT1G07930.2	1331
MTQEEVNTYR	AT1G20920.1;AT1G20920.2	1332
MTQEEVNTYRK	AT1G20920.1;AT1G20920.2	1333
MTQIMFETFNTPAMYVAIQAVLSLYASGR	AT3G12110.1;AT5G59370.2;AT5G59370.1;AT3G46520.1	1334
MVNHFVQEFK	AT5G02490.1;AT1G56410.1;AT3G09440.2;AT3G09440.1;AT5G02500.1;AT5G02500.2;AT3G12580.1	1336
MVNHFVQEFKR	AT5G02490.1;AT1G56410.1;AT3G09440.2;AT3G09440.1;AT5G02500.1;AT5G02500.2;AT3G12580.1	1337
MVQEAEKYK	AT5G02490.1;AT1G56410.1;AT3G09440.2;AT3G09440.1;AT5G02500.1;AT5G02500.2;AT3G12580.1	1338
MVQEAEKYKSEDEEHK	AT5G02490.1;AT1G56410.1;AT3G09440.2;AT3G09440.1;AT5G02500.1;AT5G02500.2	1339
MYQGAGGEAGGPGASGMDDDAPPASGGAGPK	AT5G02500.1;AT5G02500.2	1340
MYQGAGGEAGGPGASGMDDDAPPASGGAGPKIEEVD	AT5G02500.1;AT5G02500.2	1341
MYQKFQISGK	AT2G15370.1	1342
NAGVNGSVVSEK	AT1G55490.2;AT1G55490.1;AT3G13470.1;AT5G56500.2;AT5G56500.1	1344
NAILAIMSIYK	AT4G31490.1;AT4G31480.2;AT4G31480.1	1345
NALENYAYNMR	AT5G02490.1;AT3G09440.2;AT3G09440.1;AT5G02500.1;AT5G02500.2;AT3G12580.1	1348
NALETYVYNMK	AT5G28540.1;AT5G42020.1;AT5G42020.2	1349
NALICVQGPGYITAR	ATCG00740.1	1350
NATLTNEKEVDAHPIR	AT1G56070.1	1351
NAVVTVPAYFNDSQR	AT5G02490.1;AT1G56410.1;AT3G09440.2;AT3G09440.1;AT5G02500.1;AT5G02500.2;AT3G12580.1;AT1G16030.1	1352
NDGGAMIPIR	AT2G36880.2;AT2G36880.1	1354
NDVFAIENR	AT1G71500.1	1355
NEAAATTLNR	AT5G23080.2;AT5G23080.1	1356
NFEGLDLGK	AT3G14415.3;AT3G14415.1;AT3G14415.2	1357
NFGIWLR	AT2G34480.1;AT1G29965.1;AT1G29970.2	1358
NFISDDTFFVR	ATCG00500.1	1359
NFLTLPNIK	AT2G39730.2;AT2G39730.3;AT2G39730.1	1360
NFYIEVK	AT1G20920.1;AT1G20920.2;AT3G09620.1	1361
NGFAQSLQVNTSLMTYQANNNQFQQQSGK	AT1G32870.1;AT1G32870.2	1362
NGHVEIIANDQGNR	AT5G28540.1;AT5G42020.1;AT5G42020.2	1363
NGIKVNFK	CON__PSB_N_GS_green;CON__PSB_N_GS_yellow;CON__PSB_C_GS_green;CON__PSB_N_GFP;CON__PSB_C_GFP;CON__PSB_C_GS_yellow;CON__P42212;CON__Q9U6Y5	1364
NGIKVNFKIR	CON__PSB_N_GS_green;CON__PSB_N_GS_yellow;CON__PSB_C_GS_green;CON__PSB_N_GFP;CON__PSB_C_GFP;CON__PSB_C_GS_yellow;CON__P42212;CON__Q9U6Y5	1365
NHEEEMKDLR	CON__P13645	1366
NHGMHFR	ATCG00490.1	1367
NHGVPDTTVNKMQTVAREFFHQPESER	AT4G10500.1	1368
NIANMVPPFDKVK	AT5G14740.2;AT5G14740.1;AT5G14740.5;AT5G14740.4;AT5G14740.3;AT3G01500.1;AT3G01500.3;AT3G01500.2	1369
NIIHFYNLANQAVER	AT1G78900.2;AT1G78900.1	1370
NILLNEGIR	ATCG00270.1	1371
NIVEQAAIR	AT3G56340.1;AT2G40590.1;AT2G40510.1	1372
NKITITNDKGR	AT5G02490.1;AT1G56410.1;AT3G09440.2;AT3G09440.1;AT5G02500.1;AT3G12580.1	1373
NKLNDLEDALQQAK	CON__P04264	1374
NKLNDLEDALQQAKEDLAR	CON__P04264	1375
NKLNDLEEALQQAK	CON__P35908	1376
NKYEDEINKR	CON__P04264;CON__Q6IFZ6;CON__P02538;CON__Q8VED5;CON__P04259;CON__P13647	1377
NLAGDVIGTR	AT5G01530.1	1378
NLDLDSIIAEVK	CON__P35908;CON__Q5XKE5;CON__P02538;CON__O95678;CON__Q8VED5;CON__P04259;CON__P13647	1379
NLEGHLLSLDSMSSQDVEK	AT3G23900.3;AT3G23900.1	1380
NLLENWLAEDKLECSEELGDLVK	AT3G11130.1;AT3G08530.1	1381
NLNAMNQLK	AT2G36460.2;AT3G52930.1;AT2G36460.1	1382
NLNTDAFR	AT3G09260.1;AT1G66270.2;AT1G66280.1;AT1G66270.1	1383
NLSQQCLNALAK	AT3G60750.2;AT3G60750.1;AT2G45290.1	1384
NLTVPELTQQMWDAK	AT2G29550.1	1385
NLYIISVK	AT3G04400.2;AT3G04400.1;AT2G33370.1;AT1G04480.1	1386
NMIESLSVPTFR	AT3G25860.1	1387
NMIIVPEMIGSIIGVYNGK	AT1G04270.2;AT5G09510.1;AT1G04270.1;AT5G09510.2;AT5G43640.1	1388
NMMCAADPR	AT5G44340.1;AT5G62700.1;AT5G62690.1;AT1G20010.1;AT2G29550.1;AT5G12250.1	1390
NMQDMVEDYR	CON__P04264	1391
NMSLISR	ATCG00650.1	1392
NMSVIAHVDHGK	AT1G56070.1	1393
NMVESLGVPTFR	AT1G34430.1	1394
NNAGYPHNVVFDEDEIPSGVDVAK	AT1G20340.1	1395
NNEFATWLK	AT1G79200.1	1396
NNEFATWLKEEK	AT1G79200.1	1397
NNGFAVEK	AT2G34160.1;AT1G29250.1	1398
NPDDGGSIVQSLQISTMFTHHQK	AT3G15730.1	1399
NPEDIPWAEAGADYVVESTGVFTDKDK	AT3G04120.1	1400
NPEDIPWGEAGADFVVESTGVFTDKDK	AT1G13440.1;AT1G13440.2	1401
NPEDIPWGEAGADFVVESTGVFTDKDKAAAHLK	AT1G13440.1;AT1G13440.2	1402
NPNRPIASFIFSGPTGVGK	AT5G50920.1;AT3G48870.2;AT3G48870.1	1403
NPSLLPWK	AT3G26650.1	1404
NQASNWPLR	AT1G32870.1;AT1G32870.2	1405
NQCTQVVQER	CON__P15924	1406
NQILNLTTDNANILLQIDNAR	CON__P13645	1407
NQLDSALVLMITKAWSAAK	AT1G36320.1	1408
NQMQVNVTADHR	AT1G34430.1	1409
NQPGNPNPDAEVIALSPK	AT1G14580.2;AT1G14580.1	1410
NQQQNANSVLR	AT5G36230.1	1411
NQVAMNPINTVFDAK	AT3G09440.2;AT3G09440.1	1412
NQVAMNPINTVFDAKR	AT3G09440.2;AT3G09440.1	1413
NQVAMNPVNTVFDAK	AT5G02490.1;AT1G56410.1;AT5G02500.1;AT5G02500.2	1414
NQVAMNPVNTVFDAKR	AT5G02490.1;AT1G56410.1;AT5G02500.1;AT5G02500.2	1415
NRELEVIHSR	AT2G34420.1;AT2G34430.1;AT2G05100.1;AT2G05070.1;AT3G27690.1;AT1G29930.1;AT1G29920.1;AT1G29910.1	1416
NSDIDPQEAQQTLEIAEANLR	ATCG00470.1	1417
NSELATELENATR	AT5G20490.2;AT5G20490.1;AT5G20470.1	1418
NSIDDVVLVGGSTR	AT3G09440.2;AT3G09440.1	1419
NSKIEISELNR	CON__P04264	1420
NSSDDEEDHQHLIPQNDTR	AT5G50420.1	1421
NSSYFVEWIPNNVK	AT5G44340.1;AT5G62700.1;AT5G62690.1;AT1G20010.1;AT2G29550.1;AT5G12250.1	1422
NTIRDEKIGEK	AT5G02490.1;AT3G09440.2;AT3G09440.1	1423
NTMLVNVTADHR	AT3G25860.1	1424
NTQPIMNTNGSYFVYSK	CON__P01868;CON__P01869	1425
NTQPIMNTNGSYFVYSKLNVQK	CON__P01868;CON__P01869	1426
NTTMFEEPQRRR	AT1G22260.1	1427
NVETMNKLEQTQNTIQELMAELGK	AT5G41790.1	1428
NVGASLVK	AT2G33210.2;AT2G33210.1;AT3G23990.1	1429
NVGHEISENDLLQLFQPFGVITK	AT1G43190.3;AT1G43190.2;AT1G43190.1	1430
NVIIEQSWGAPK	AT2G33210.2;AT2G33210.1	1431
NVQALEIELQSQLALK	CON__P13645	1432
NVQDAIADAEQR	CON__P35908	1433
NVSTGDVNVEMNAAPGVDLTQLLNNMR	CON__P13645	1434
NVVIEQSWGAPK	AT3G23990.1	1435
NVVLDEFGSPK	AT2G28000.1	1436
NVVLPTGGDAIIAGAAAAPEEIKADAENGEAGEAR	AT3G57150.1	1437
NWVPVVPLSALPK	AT1G71500.1	1438
NYCKENGIQLHDK	AT5G14470.1	1439
NYELPDGQVITIGAER	AT5G09810.1;AT3G18780.2;AT1G49240.1;AT3G18780.1	1440
NYITYAMTLLQDK	AT1G76010.1	1441
NYIVWNINMNTHIFPEFVVR	AT1G32230.1;AT1G32230.2;AT1G32230.3	1442
NYLTFFCLGNR	AT3G15730.1	1444
NYSPYYNTIDDLKDQIVDLTVGNNK	CON__P35527	1445
PAYLDGSAPGDFGFDPLGLGEVPANLER	AT3G54890.3;AT3G54890.2;AT3G54890.4;AT3G54890.1	1446
PCICTVPEVSSVFIFPPKPK	CON__P01868;CON__P01869	1447
PEVNQKMMK	AT2G28620.1;AT2G36200.1;AT2G36200.2	1449
PEVPNKDRGTEVAAAR	AT3G42060.1	1450
PGASVKLSCK	CON__P06328;CON__P01751;CON__P01753;CON__P01748;CON__P01755	1451
PGGDVTIGELLK	AT3G15730.1	1452
PGGDVTIGELLKK	AT3G15730.1	1453
PGPVGSGSDFGR	AT3G29075.1	1454
PKDVLTITLTPK	CON__P01868;CON__P01869	1456
PLINVCDR	AT3G11130.1;AT3G08530.1	1457
PLLGCTIKPK	ATCG00490.1	1458
PNFSSNHDSSAYDDQALK	AT3G29075.1	1459
PQPLIQCFTYNEISK	AT5G57670.2	1460
PSETVTCNVAHPASSTK	CON__P01868;CON__P01869	1461
PSNGDLDRQIEQLMECK	AT1G10430.1	1462
QAQEIIEELLKPVDESQDFIK	AT2G38610.2;AT2G38610.1	1464
QAQEIIEELLKPVDESQDFIKR	AT2G38610.2;AT2G38610.1	1465
QDSFASTEPNNRRSLMSER		1467
QEIECQNQEYSLLLSIK	CON__P35527	1468
QEVLKSAPGVK		1470
QEYEQLIAK	CON__P35527	1471
QFAAEEISAQVLR	AT4G24280.1;AT5G49910.1	1472
QFAAEEISSMVLIK	AT5G02490.1;AT1G56410.1	1473
QFKNETEYTVTQAISAQEANRR	AT3G13870.2;AT3G13870.1	1475
QFSAEEISSMVLIK	AT3G12580.1	1476
QFSSSYLSR	CON__P35527	1477
QGELEAVVIATGVHTFFGK	AT1G80660.2;AT1G80660.1	1478
QGMFVIPFMTR	ATCG00680.1	1480
QGVDADINGLR	CON__P35527	1481
QIEQIYLHSLPVK	AT2G41840.1	1482
QINNGSSWVQELNNDGLTVTR	AT1G32870.1;AT1G32870.2	1483
QISNLQQSISDAEQR	CON__P04264	1484
QIVLTQSPAIMSASPGQK	CON__P04943;CON__P04942;CON__P04940	1485
QKLGPFLQVMPNCCR	AT1G09660.1;AT1G09660.2	1486
QLDSIVGER	CON__P02538;CON__P04259;CON__P13647	1487
QLFHPEQLISGKEDAANNFAR	AT4G14960.2;AT1G50010.1;AT1G04820.1;AT4G14960.1;AT1G64740.1;AT5G19780.1;AT5G19770.1	1488
QLGSNNALNNAR	AT2G33800.1	1489
QLIDQVVSTALPESK	AT3G11130.1;AT3G08530.1	1490
QLQAEDVIVK	AT5G30510.1	1491
QLVEESQEYR	AT1G44910.2;AT1G44910.1	1492
QLVNIPSFMVR	AT5G15200.1;AT5G39850.1	1493
QMQNGEAKHVSNGR	AT2G28620.1	1494
QNGVLNSWTDQDSK	CON__P01837	1495
QNGVLNSWTDQDSKDSTYSMSSTLTLTK	CON__P01837	1496
QNGVLNSWTDQDSKDSTYSMSSTLTLTKDEYER	CON__P01837	1497
QNLEPLFEQYINNLR	CON__P02538;CON__P04259;CON__P13647	1498
QNLEPLFEQYINNLRR	CON__P02538;CON__P04259;CON__P13647	1499
QPIGTSAQSDKDYK	AT2G45960.2;AT2G45960.1;AT2G45960.3;AT3G61430.2;AT3G61430.1	1500
QQEALETMR	AT5G20490.2;AT5G20490.1	1501
QQRPNTDELEAMR	AT1G77680.1	1502
QRPLLIVAEDVESDALATLILNK	AT2G33210.2;AT2G33210.1	1503
QRPLLIVSEDVESDALATLILNK	AT3G23990.1	1504
QSAIQLNNR	AT3G60600.1	1505
QSLEASLAETEGR	CON__P13645;CON__P02535	1506
QSLYKNMEMITR	AT2G27430.1	1507
QSNILEDLATLTLLSK	AT5G05010.2;AT5G05010.1	1508
QSQPASNLVSQVKNEPR	AT3G12980.1	1509
QSVEADINGLR	CON__P13645;CON__P02535;CON__Q2M2I5	1510
QSVEADINGLRR	CON__P13645;CON__P02535	1511
QTIEANLALR	ATCG00470.1	1513
QTVAVGVIK	AT5G60390.3;AT5G60390.1;AT1G07940.2;AT1G07940.1;AT1G07930.1;AT1G07920.1;AT1G07930.2	1514
QTVLFSATFPR	AT1G20920.1;AT1G20920.2;AT3G09620.1	1515
QVANATNDVAGDGTTCATVLTR	AT2G33210.2;AT2G33210.1;AT3G23990.1	1518
QVLDNLTMEK	CON__P35527	1520
QVLDNLTMEKSDLEMQYETLQEELMALK	CON__P35527	1521
QVLDNLTMEKSDLEMQYETLQEELMALKK	CON__P35527	1522
QVQCISFIAYKPPSFTEA	AT5G38420.1;AT5G38410.1;AT5G38410.3;AT5G38410.2	1523
QVQCISFIAYKPPSFTG	AT1G67090.1	1524
QWFFFSLR	AT1G32870.1;AT1G32870.2	1526
QWFYFTPR	AT1G34190.1	1527
QYFLGLEK	AT1G61520.2;AT1G61520.3;AT1G61520.1	1528
QYFRPEFLNR	AT5G50920.1;AT3G48870.2;AT3G48870.1	1529
QYNLDNMMDGFYIAPAFMDK	AT2G39730.2;AT2G39730.3;AT2G39730.1	1530
QYQALGGGANTIAHGYTK	AT2G45960.2;AT2G45960.1;AT2G45960.3	1531
QYQALGGGANTVAHGYTK	AT3G61430.2;AT3G61430.1	1532
RCGGEDVKDAYVLYK	AT1G32870.1;AT1G32870.2	1534
RDDSEYLLLNQLGGILGLSSK	AT1G06950.1	1535
RDELTLEGIK	AT1G54270.1;AT1G54270.2;AT3G19760.1;AT3G13920.1;AT3G13920.3;AT3G13920.4;AT3G13920.2;AT1G72730.1	1536
RDLNVVGFGLIGWLAPSSIPAINGK	AT1G08380.1	1537
RDNSGVTLEGPK	AT1G32230.1;AT1G32230.2;AT1G32230.3	1538
REEFEEISIPILER	AT1G79930.2;AT1G79930.1;AT1G79920.2;AT1G79920.1	1539
RFSDSSVQSDMK	AT5G02500.1;AT5G02500.2	1541
RFTDSSVQSDIK	AT3G09440.2;AT3G09440.1	1542
RGEDVVHPLK	AT3G44110.2;AT5G22060.1;AT3G44110.1	1543
RGISMAVDAVVTNLK	AT3G23990.1	1544
RGNLPGAENLVVQR	AT3G11130.1;AT3G08530.1	1545
RGVQIVQNALK	AT3G13860.1	1546
RGYVASNSKDDPAK	AT5G60390.3;AT5G60390.1;AT1G07940.2;AT1G07940.1;AT1G07930.1;AT1G07920.1;AT5G60390.2	1547
RIQKGPVR	AT3G10610.1;AT2G05220.2;AT2G05220.1;AT5G04800.4;AT5G04800.3;AT5G04800.2;AT5G04800.1;AT2G04390.1	1548
RLDRPGLK	AT5G23080.2;AT5G23080.1	1549
RLEMQELR	AT5G53800.1	1550
RLFLGAGFANTSVVGGQNFK	AT5G46810.1	1551
RLNPILGNGIITSNGPHWAHQRR	AT5G24900.1	1552
RLPPIQSGDR	ATCG00650.1	1553
RLTSHLELHR	ATCG01120.1	1554
RPEFTAWLLEVK	AT5G53800.1	1555
RPFAAIVGGSK	AT3G12780.1;AT1G56190.2;AT1G56190.1	1556
RPGTPSLNQSPR	AT2G21390.1;AT1G62020.1	1557
RPITADSALMNPNSR	AT3G11130.1	1558
RPKPGGDVTIGELLK	AT3G15730.1	1559
RPLQEYIR	AT3G57150.1	1560
RSVYEPLQTGLIAIDSMIPIGR	ATCG00120.1	1562
RTETPLDVLVCNAAVYFPTAK	AT4G27440.2;AT4G27440.1	1563
RTNPTTSNPEVSIR	ATCG00480.1	1564
RTYFNDLTTEAAR	AT1G79200.1	1566
RVEELQMNVQK	ATCG00800.1	1567
RVELATHCR	AT1G09660.1;AT1G09660.2	1568
RVLDELTLAR	CON__P02533;CON__Q6IFX2;CON__P19012;CON__P08727;CON__P19001;CON__Q04695;CON__Q9QWL7;CON__P08779	1569
RVLDELTLTK	CON__P13645	1570
RVQEWQELKR	AT1G20920.1;AT3G09620.1	1571
RVQLAETYLSQAALGDANADAIGR	AT2G39730.2;AT2G39730.3;AT2G39730.1	1572
RVSEQFTAMFR	AT5G44340.1;AT5G62700.1;AT5G62690.1;AT1G20010.1;AT2G29550.1;AT5G12250.1	1573
RVSSFPDLDR	AT1G09660.1;AT1G09660.2	1574
RVSSFPDLDRYEHGSPFR	AT1G09660.1;AT1G09660.2	1575
RVTFLVMDEADR	AT1G20920.1;AT1G20920.2	1576
RVVHDLAQSR	AT1G06950.1	1577
SAAIEFK	AT1G32230.1;AT1G32230.2;AT1G32230.3	1578
SAASLNSR	CON__P00760	1579
SADQQVADMK	AT5G41790.1	1580
SADVAAAPVVK	AT1G72150.1	1581
SAENNLYVVEGMQFDR	AT1G55490.2;AT1G55490.1;AT3G13470.1	1582
SAGKDAFHLR	AT1G14320.1;AT1G66580.1;AT1G26910.1	1583
SAIELSTSDYDKEK	AT3G23990.1	1584
SAIELSTSDYDKEKLQER	AT3G23990.1	1585
SALASVIMGMAPVLGK	AT1G13320.2;AT3G25800.2;AT3G25800.1;AT1G13320.3;AT1G13320.1	1586
SAMPEGYVQER	CON__PSB_N_GS_green;CON__PSB_N_GS_yellow;CON__PSB_C_GS_green;CON__PSB_N_GFP;CON__PSB_C_GFP;CON__PSB_C_GS_yellow;CON__P42212;CON__Q9U6Y5	1587
SAPAFIELDTK	ATCG00480.1	1588
SAQFVLDLLK	AT1G67430.2;AT1G67430.1;AT1G27400.1	1589
SATELAAAR	AT3G23900.3;AT3G23900.1;AT3G23900.2	1590
SAYPGQITSNMFCAGYLEGGK	CON__P00760	1591
SCALINQK	AT1G33140.1;AT1G33120.1;AT4G10450.1	1592
SCDIIALRTCNEIEGK	AT2G22930.1	1593
SDDEHHFEASESGASK	AT1G26630.1;AT1G26630.2	1594
SDLDIVSNASCTTNCLAPLAK	AT1G13440.1;AT3G04120.1	1595
SDLEMQYETLQEELMALK	CON__P35527	1596
SDLEMQYETLQEELMALKK	CON__P35527	1597
SDSVVSTYR	AT1G01090.1	1598
SDYLPPILTT	AT3G15730.1	1599
SEDLDVVEEEADLKK	AT1G20920.1	1600
SEITELRR	CON__P13645;CON__P02535	1601
SELFDLLDPLKSER	AT4G27500.1	1602
SELSNQITDVQK	AT5G41790.1	1603
SENPVILFEHVLLYNLK	AT2G34590.1;AT1G30120.1	1604
SETEMDVDEETKPENDGDAK	AT1G20920.1	1605
SEVTELRR	CON__P08779	1606
SEYDESGPSIVHR	AT5G09810.1	1607
SFELLSLLPK	AT5G17920.2;AT5G17920.1	1608
SFGAAVIYNNQK	AT2G39010.1	1610
SFGVLIHDQGIALR	AT3G11630.1	1611
SFIEELFQR	AT1G70070.1	1612
SFNAGQITSK	AT3G11130.1;AT3G08530.1	1613
SFQCELVMAK	AT2G39730.2;AT2G39730.3;AT2G39730.1	1614
SFQDLESGR	AT5G46860.1	1615
SFSVFLGKQLQSSNASPSMK	AT1G67140.1;AT1G67140.2;AT1G67140.3	1616
SFVALPVIAR	AT1G79850.1	1617
SGATVINGLFLK	AT1G74470.1	1618
SGAYIVR	AT3G17390.1;AT4G01850.2;AT4G01850.1;AT1G02500.2;AT1G02500.1;AT2G36880.2;AT2G36880.1	1619
SGEHKEGIVDKIK	AT1G54410.1	1620
SGFSSISVSR	CON__P04259	1621
SGFSSVSVSR	CON__P02538	1622
SGGEVNFPK	AT3G63160.1	1623
SGGGFSSGSAGIINYQR	CON__P04264	1624
SGGGGGGGGCGGGGGVSSLR	CON__P13645	1625
SGGGGGGGLGSGGSIR	CON__P35527	1626
SGILLSFVR	ATCG00750.1	1627
SGLEDIKNETVDLEKIPIEEVFQQLK	AT2G18960.1	1628
SGLYNNSSYFSPAR	AT2G38610.2;AT2G38610.1	1629
SGNGLLLK	AT2G39800.2;AT2G39800.3;AT2G39800.4;AT2G39800.1;AT3G55610.1;AT3G55610.2	1630
SGPAEKPMIVVNYK	AT3G09440.2;AT3G09440.1	1631
SGPDGWIPNTVK	AT5G62200.1	1632
SGPFGQIFRPDNFVFGQSGAGNNWAK	AT5G44340.1;AT1G20010.1	1633
SGPYGQTFRPDNFVFGQSGAGNNWAK	AT5G62700.1;AT5G62690.1	1634
SHLTHSYYK	AT5G20490.2;AT5G20490.1	1635
SHSEADQFAR	AT1G06950.1	1636
SIDGGAAAGFPESPEAAAEAGLVSGK	AT3G15730.1	1637
SIDGGAAAGFPESPEAAAEAGLVSGKDNIIDR	AT3G15730.1	1638
SINPDEAVAYGAAVQAAILSGEGNEK	AT5G02490.1;AT1G56410.1;AT3G09440.2;AT3G09440.1;AT3G12580.1	1640
SINPDEAVAYGAAVQGAILSGEGNEK	AT5G02500.1;AT5G02500.2	1641
SISHVVITLK	AT5G22330.1	1644
SISISVAGGGGGFGAAGGFGGR	CON__P35908	1645
SISISVAR	CON__P04264	1646
SITDYGSPEEFLSQVNYLLGK	AT1G06680.2;AT1G06680.1	1647
SITVNEAQSR	AT2G21660.2;AT2G21660.1	1648
SIVASGLAR	AT3G17390.1	1649
SIVHPSYNSNTLNNDIMLIK	CON__P00760	1650
SIVHPSYNSNTLNNDIMLIKLK	CON__P00760	1651
SIVHPSYNSNTLNNDIMLIKLKSAASLNSR	CON__P00760	1652
SIYGVGIHLTAADCPYFSAR	AT1G32230.1;AT1G32230.2;AT1G32230.3	1653
SKAEAESLYQSK	CON__P04264	1654
SKAEAESLYQSKYEELQITAGR	CON__P04264	1655
SKATLTVDK	CON__P06328;CON__P01751;CON__P01754;CON__P06329	1657
SKDTEAAVDAEDESAAEK	AT3G57150.1	1658
SKEEAEALYHSK	CON__P35908	1659
SKEEAEALYHSKYEELQVTVGR	CON__P35908	1660
SKEIPGSIRDHEEGAGGL	AT1G32230.1;AT1G32230.2	1661
SLASVVEELEK	AT1G06950.1	1662
SLDIERPTYTNLNR	AT5G19780.1;AT5G19770.1	1663
SLDLDSIIAEVK	CON__P04264	1664
SLGAAIIFNK	AT2G45960.2;AT2G45960.1;AT2G45960.3	1665
SLGAAIIYNK	AT3G61430.2;AT3G61430.1;AT1G01620.1;AT4G00430.1;AT1G01620.2;AT3G54820.1;AT4G23400.1	1666
SLGQPTNGKLDLEGWSMMQAEENCHLQR	AT1G09660.1;AT1G09660.2	1668
SLIPVVTNPSTGLVFGNNR	AT3G46780.1	1669
SLLEEDAIR	AT4G35090.1;AT4G35090.2	1671
SLLEGEGSSGGGGR	CON__P13645	1672
SLLSHEK	AT5G26742.1;AT5G26742.2;AT5G26742.3	1674
SLLVELISAK	AT3G45140.1	1675
SLNNQFASFIDK	CON__P04264	1676
SLNNQFASFIDKVR	CON__P04264	1677
SLSMVYNR	AT4G04640.1	1679
SLSSMILEITDELK	AT5G41790.1	1680
SLTVPELTQQMWDSK	AT5G62700.1;AT5G62690.1	1681
SLVANEEFQHILR	AT4G09800.1;AT1G34030.1;AT1G22780.1	1682
SLVGLGGTK	CON__P35908	1683
SLVNLGGSK	CON__P04264	1684
SLVTEELK	AT5G50920.1;AT3G48870.2;AT3G48870.1	1685
SMQEAAQWR	AT1G65280.1	1686
SMREEGGFEVIKK	AT5G35630.3;AT5G35630.2;AT5G35630.1	1687
SMVDELEAMLDVVDPQPQGK	AT5G62390.1	1688
SMVEASTSDYDKEK	AT2G33210.2;AT2G33210.1	1689
SNWEAGNTFTCSVLHEGLHNHHTEK	CON__P01868;CON__P01869	1690
SPAEGAYSEGLLNAR	AT1G71500.1	1691
SPEQVSAAVK	AT3G11130.1;AT3G08530.1	1692
SPHGIPIDLLDR	AT5G67630.1	1693
SPIMPFPLLFK	AT2G35510.1	1694
SPSPMASSNLMSNVSNTGLGGWNGLSQER	AT2G38610.2;AT2G38610.1	1695
SPWMPFPTLFAAISHK	AT1G32230.1;AT1G32230.2;AT1G32230.3	1696
SPYQEHTDFLASK	AT2G41840.1	1697
SPYQEHTDFLSTK	AT1G59359.1;AT1G58983.1;AT1G58684.1;AT1G58380.1	1698
SQIDEIVLVGGSTR	AT5G28540.1;AT5G42020.1;AT5G42020.2	1699
SQLLENVFADPK	AT1G01090.1	1701
SQPLTISDLIEK	AT3G46780.1	1702
SQPSFLVEQEK	AT4G26480.1	1703
SQPSFLVEQEKYLSELLAER	AT4G26480.1	1704
SQSSVFVEQEK	AT5G56140.1	1706
SQYEQLAEQNR	CON__P13645	1707
SQYEQLAEQNRK	CON__P13645	1708
SRAEAESWYQTK	CON__P02538;CON__O95678;CON__Q8VED5;CON__P04259	1709
SRAQELGLK	AT1G24460.2;AT1G24460.1	1710
SRDHTVSATHGDMDQNTR	AT1G54270.1;AT1G54270.2;AT3G13920.1;AT3G13920.3;AT3G13920.4;AT3G13920.2;AT1G72730.1	1711
SRDIQIQQMEEQLNQLVYK	AT5G05180.2;AT5G05180.1	1712
SRQLDAFEMKFK	AT2G37420.1	1713
SSDVEMVDAEK	AT1G48920.1	1714
SSFVFVSDFR	AT1G72150.1;AT1G22530.1	1715
SSGTSYPDVLK	CON__P00760	1716
SSLEDIKNETVDLEKIPIEEVFQQLK	AT4G30190.1;AT4G30190.2	1718
SSRPLLIVAEDVESDALAMLILNK	AT3G13860.1	1719
SSSSMRK	AT3G09070.1	1720
SSVCDIAPK	AT5G44340.1	1722
SSVHDVVLVGGSTR	AT3G12580.1;AT1G16030.1	1723
STGNNVVVMDSDSAVK	AT1G32870.1;AT1G32870.2	1725
STGNNVVVMDSDSAVKR	AT1G32870.1;AT1G32870.2	1726
STHPELVTVIEQALSR	AT1G02080.2;AT1G02080.1	1727
STITTLQNQPK	AT1G32230.1;AT1G32230.2	1728
STLLDSLAGR	AT1G51500.1;AT3G21090.1	1730
STLTDSLVAAAGIIAQEVAGDVR	AT1G56070.1	1731
STMQELNSR	CON__P35527	1732
STNLDWYK	AT5G60390.3;AT5G60390.1;AT1G07940.2;AT1G07940.1;AT1G07930.1;AT1G07920.1;AT1G07930.2;AT5G60390.2	1733
STSSFSCLSR	CON__P35908	1734
STTTGHLIYK	AT5G60390.3;AT5G60390.1;AT1G07940.2;AT1G07940.1;AT1G07930.1;AT1G07920.1;AT1G07930.2;AT5G60390.2	1735
STVCDIPPTGLK	AT5G62700.1;AT5G62690.1;AT2G29550.1	1736
STVHDVVLVGGSTR	AT5G02500.1;AT5G02500.2	1737
SVAAGMNAMDLR	AT2G33210.2;AT2G33210.1;AT3G23990.1	1738
SVADLLQDQLGLALAR	ATCG00190.1	1739
SVEDSELFGSKK	AT5G09350.1	1740
SVEEASNAMALDGIILEGVPVK	AT1G60900.1	1741
SVPSSPGPNWLNSPGSSSGLIAK	AT5G56140.1	1742
SVSELPIMHQDWLNGK	CON__P01868;CON__P01869	1743
SVSELPIMHQDWLNGKEFK	CON__P01868;CON__P01869	1744
SVSSSPAPNWLNSPGSSSGLIVK	AT4G26480.1	1745
SVTGFLSDLYR	AT5G26742.1;AT5G26742.2;AT5G26742.3	1746
SVYEPLQTGLIAIDSMIPIGR	ATCG00120.1	1747
SWFNFMFSK	ATCG00500.1	1748
SWLAFAAQK	AT5G17920.2;AT5G17920.1;AT3G03780.3;AT3G03780.2;AT3G03780.1;AT5G20980.2;AT5G20980.1	1749
SYLIAISGEK	AT1G31330.1	1751
TAAENDFVTLK	CON__P35908	1753
TAAENDFVTLKK	CON__P35908	1754
TAAENEFVTLKK	CON__P02538;CON__P04259	1755
TAALGQHDEAMDEK	CON__PSB_N_GS_green;CON__PSB_N_GS_yellow	1756
TAAYYQQGAR	AT2G21330.1;AT2G21330.3;AT2G21330.2;AT4G38970.1;AT4G38970.2	1757
TAENFANYTGDQGYPGGR	AT1G15820.1	1758
TAFFQLFAYIQGK	AT1G17100.1	1759
TAHDWMIK	AT1G79200.1	1760
TAHDWMIKR	AT1G79200.1	1761
TAIAEGLAQR	AT5G50920.1;AT3G48870.2;AT3G48870.1;AT2G25140.1	1762
TALSHVDNLISGVTR	AT1G33140.1;AT1G33120.1	1763
TALTDAASVSLLLTTTEASVLVK	AT3G13860.1	1764
TALTYIDSDGNWHR	AT2G18960.1	1765
TALVDAASVSSLLTTTEAVVTEIPTK	AT2G33210.2;AT2G33210.1	1766
TANLANNQIINYK	AT3G11130.1;AT3G08530.1	1767
TATFCSGVLQQLDYALLQCQALVLAPTR	AT1G54270.1;AT1G54270.2	1768
TAVSVEESVVR	AT5G66420.1;AT5G66420.2	1769
TAVYQYGGVDVHGQVPSYDR	AT3G13460.2;AT3G13460.4;AT3G13460.1;AT3G13460.3	1770
TCILDDFSFYEVR	AT3G13460.2;AT3G13460.4;AT3G13460.1	1771
TCYAQSSQIR	AT4G34670.1;AT3G04840.1	1772
TDKIKDEDIVTLVDQFPGQSIDFFGALR	AT2G39730.2;AT2G39730.3;AT2G39730.1	1774
TDKPFGINGSMDLR	AT1G79040.1	1775
TDLEMQIEGLKEELAYLR	CON__P08779	1776
TEELNKEVASNSELVQSSR	CON__P08779	1777
TEGFNRLPK	ATCG00160.1	1779
TEGLIPLQMMHDIIDNEM	AT3G06730.1	1780
TEIIGGSVDGTVR	AT5G64730.1	1781
TEYSSYAR	AT3G29075.1	1782
TEYSSYARPGPVGSGSDFGR	AT3G29075.1	1783
TFAEEVNAAFR	AT1G12900.4;AT1G12900.3;AT1G12900.1;AT1G12900.2;AT3G26650.1	1784
TFNEALDTTQTVIWNGPMGVFEMEK	AT3G12780.1	1785
TFQGPPHGIQVER	ATCG00490.1	1786
TGALLLDGNTLNYFGK	AT4G10340.1	1787
TGDIVEIK	AT4G17560.1;AT5G47190.1	1788
TGHYTPISAGHSPLK	AT3G57150.1	1789
TGPGYAEEHQLFPASFK	AT4G26450.1	1790
TGPLELK	AT4G32540.1	1791
TGTIPDKDILVLIK	AT2G36880.2;AT2G36880.1	1792
THNLEPYFESFINNLR	CON__P04264	1793
THNLEPYFESFINNLRR	CON__P04264	1794
TIAECLADELINAAK	AT3G11940.2;AT3G11940.1;AT2G37270.2;AT2G37270.1	1795
TIEKPVEDPSELPK	AT5G35630.3;AT5G35630.2;AT5G35630.1	1796
TIFFKDDGNYK	CON__PSB_N_GS_green;CON__PSB_N_GS_yellow;CON__PSB_C_GS_green;CON__PSB_N_GFP;CON__PSB_C_GFP;CON__PSB_C_GS_yellow;CON__P42212;CON__Q9U6Y5	1797
TIFFKDDGNYKTR	CON__PSB_N_GS_green;CON__PSB_N_GS_yellow;CON__PSB_C_GS_green;CON__PSB_N_GFP;CON__PSB_C_GFP;CON__PSB_C_GS_yellow;CON__P42212;CON__Q9U6Y5	1798
TIFHLNPSGR	AT3G17390.1;AT4G01850.2;AT4G01850.1;AT1G02500.2;AT1G02500.1	1799
TIIGVLDIYGFESFK	AT5G20490.2;AT5G20490.1	1801
TILSDLITVYAK	AT5G26742.1;AT5G26742.2;AT5G26742.3	1803
TIQFVDWCPTGFK	AT4G14960.2;AT1G50010.1;AT1G04820.1;AT4G14960.1;AT1G64740.1	1805
TIRVDIPVDNYPNFNFVGR	AT5G56140.1	1806
TITLEVESSDTIDNVK	AT1G23410.1;AT3G62250.1;AT2G47110.2;AT2G47110.1;AT3G52590.1;AT2G36170.1;AT4G05050.4;AT2G35635.1;AT1G31340.1;AT4G05050.3;AT4G05050.2;AT4G05050.1;AT4G02890.2;AT4G02890.1;AT1G55060.1;AT4G05320.5;AT4G02890.4;AT4G02890.3;AT5G03240.3;AT5G03240.2;AT5G03240.1;AT1G65350.1;AT5G37640.1;AT4G05320.6;AT4G05320.3;AT4G05320.1;AT5G20620.1;AT4G05320.4;AT4G05320.2;AT3G09790.1	1807
TIYGVLGIK	ATCG00800.1	1808
TKDELTEEESLSGKDYLDPPPVK	AT2G39010.1	1810
TKDNNLLGK	AT5G02490.1;AT3G09440.2;AT3G09440.1;AT5G02500.1;AT3G12580.1	1811
TKEVEGEEAEEKVK	AT3G57150.1	1812
TKYEHELALR	CON__P08779	1813
TKYETELNLR	CON__P02533;CON__Q6IFX2	1814
TLADYNIQK	AT1G23410.1;AT3G62250.1;AT2G47110.2;AT2G47110.1;AT3G52590.1;AT2G36170.1;AT4G05050.4;AT2G35635.1;AT1G31340.1;AT4G05050.3;AT4G05050.2;AT4G05050.1;AT4G02890.2;AT4G02890.1;AT1G55060.1;AT4G05320.5;AT4G02890.4;AT4G02890.3;AT5G03240.3;AT5G03240.2;AT5G03240.1;AT1G65350.1;AT5G37640.1;AT4G05320.6;AT4G05320.3;AT4G05320.1;AT5G20620.1;AT4G05320.4;AT4G05320.2;AT3G09790.1	1815
TLAFGIPIIK	AT5G26742.1;AT5G26742.2;AT5G26742.3	1816
TLDTVHHDDFHQPNFTGAAITK	AT3G15730.1	1818
TLFAANLSFNIER	AT1G48920.1	1819
TLFNELEVVEGMK	AT2G33210.2;AT2G33210.1;AT3G23990.1	1820
TLFNELEVVEGMKLDR	AT3G23990.1	1821
TLGFVLPMLR	AT1G20920.1;AT1G20920.2;AT3G09620.1	1822
TLLDIDNTR	CON__P35527	1823
TLLEGEESR	CON__P04264	1824
TLLFGEKPVTVFGIR	AT1G13440.1;AT1G13440.2;AT3G04120.1	1825
TLLVADPR	AT5G18380.2;AT5G18380.1;AT2G09990.1;AT3G04230.1	1826
TLNDMRQEYEQLIAK	CON__P35527	1827
TLNLCVLTPNR	ATCG00470.1	1828
TLNNDIMLIK	CON__P07477	1829
TLPADSNNVASAAGITK	AT3G13460.2;AT3G13460.4;AT3G13460.1;AT3G13460.3	1830
TLSMIVGDDDLLISTITGLQR	AT2G35510.1	1831
TLSSTAQTTIEIDSLFDGIDFYAPITR	AT3G09440.2;AT3G09440.1	1832
TLSSTAQTTIEIDSLYEGIDFYSTITR	AT5G02500.1;AT5G02500.2	1833
TLTAEAESFLK	ATCG00120.1	1834
TLTAEAESFLKEGIQEQLER	ATCG00120.1	1835
TLTSVHEAILDDVVLPAEIVGK	AT1G48830.2;AT1G48830.1	1836
TMEMMYKDVIQALR	AT3G15730.1	1838
TMLELLNQLDGFDSR	AT4G29040.1;AT2G20140.1	1840
TMLELLNQLDGFEASNK	AT5G20000.1;AT5G19990.1	1841
TNAENEFVTIK	CON__P04264	1842
TNAENEFVTIKK	CON__P04264	1843
TNDSAGDGTTTASILAR	AT2G28000.1	1844
TNKPQFQEIIASTK	ATCG00120.1	1845
TNMVMVFGEITTK	AT3G17390.1;AT4G01850.2;AT4G01850.1;AT1G02500.2;AT1G02500.1	1846
TNPADEECKVYD	AT1G42970.1	1847
TNPTTSNPEVSIR	ATCG00480.1	1848
TNWVMHEYTLHK	AT1G32870.1;AT1G32870.2	1849
TNWVMHEYTLHKEELK	AT1G32870.1;AT1G32870.2	1850
TNWVMHEYTLHKEELKR	AT1G32870.1;AT1G32870.2	1851
TPGHPENFETPGIEVTTGPLGQGIANAVGLALAEK	AT3G60750.2;AT3G60750.1	1854
TPGPGAQSALR	AT2G36160.1;AT3G52580.1;AT3G11510.1	1855
TPGVTEAYQK	AT2G38040.2;AT2G38040.1	1856
TPILVATDVAAR	AT3G58510.3;AT3G58510.2;AT3G58510.1;AT2G42520.1;AT3G58570.1	1857
TPLAWIDNAGK	AT1G32230.1;AT1G32230.2;AT1G32230.3	1858
TPLSLDK		1859
TPSSDVDSQYISQLLAEHQK	AT3G08620.1	1860
TPVEWSR	AT3G57150.1	1861
TPVSLDMLGR	AT1G76030.1;AT1G20260.1;AT4G38510.4;AT4G38510.3;AT4G38510.2;AT4G38510.1;AT4G38510.5	1862
TPVYTIASNAGVEGAVVVGK	AT2G33210.2;AT2G33210.1	1863
TPYNTLGGGANTVADGYSK	AT4G35100.2;AT4G35100.1	1864
TQDVNFADRPPHR	AT4G13770.1	1865
TQGFLALFTGDTGEIR	AT5G67630.1	1866
TQIGKVDEIFGPINESLFSIK	AT3G03920.1	1867
TQIYDPSEMIQIIAIR	AT5G22330.1	1868
TQNVLGEK	AT2G31610.1;AT5G35530.1	1869
TREEELEDEQK	AT1G20920.1	1870
TREEELEDEQKK	AT1G20920.1	1871
TRLEQEIATYR	CON__P02533;CON__Q6IFX2;CON__P19012;CON__Q61782;CON__P35900;CON__Q9D312;CON__Q04695;CON__Q9QWL7;CON__P08779;CON__Q9Z2K1;CON__Q3ZAW8	1872
TSFTFSITPR	AT3G15356.1;AT1G53080.1	1873
TSLTEDFSPEK	AT3G46780.1	1874
TSSLTLGSEEEK	AT5G23080.2;AT5G23080.1	1875
TSTSPIVK	CON__P01837	1876
TSTSPIVKSFNR	CON__P01837	1877
TSVDVLK	AT3G15730.1	1878
TSVDVLKK	AT3G15730.1	1879
TTADDLYPLFAK	AT5G64200.2;AT5G64200.1	1880
TTGELLQVYK	AT5G64730.1	1881
TTGIVLDSGDGVSHTVPIYEGFSLPHAILR	AT3G18780.2;AT1G49240.1;AT3G18780.1	1882
TTGIVLDSGDGVSHTVPIYEGYALPHAILR	AT5G09810.1;AT3G53750.1;AT2G37620.2;AT2G37620.1;AT2G42100.1;AT3G12110.1;AT5G59370.2;AT5G59370.1;AT3G46520.1	1883
TTIAIDTILNQK	ATMG01190.1;AT2G07698.1	1884
TTKWADQR	AT3G06160.1;AT3G06160.2	1885
TTLVANTSNMPVAAR	AT1G78900.2;AT1G78900.1	1887
TTPPSVYPLAPGSAAQTNSMVTLGCLVK	CON__P01868;CON__P01869	1888
TTPSVVAYTK	AT4G24280.1;AT5G49910.1	1889
TTPSYVAFTDSER	AT5G02490.1;AT1G56410.1;AT3G09440.2;AT3G09440.1;AT5G02500.1;AT5G02500.2;AT3G12580.1	1890
TTVVEQLEAQNR	AT5G41790.1	1891
TVDNDLALK	AT3G11130.1;AT3G08530.1	1892
TVEDGPDDVER	AT3G52220.1	1893
TVFNDEEQR	AT5G53800.1	1895
TVGGGDDAFNTFFSETGAGK	AT4G14960.2;AT1G50010.1;AT1G04820.1;AT4G14960.1	1897
TVLIMELINNIAK	ATCG00480.1	1899
TVLIMELINNVAK	AT5G08690.1;AT5G08670.1;AT5G08680.1	1900
TVTIVELIK	AT1G76010.1	1902
TVYVGNLPGDIR	AT1G02840.2;AT1G02840.3;AT1G02840.1	1903
TWGGRPENVNAAQTTLLAR	AT4G38970.1	1904
TYFNDLTTEAAR	AT1G79200.1	1905
TYGFLTPEFWK	AT2G41840.1;AT3G57490.1;AT1G59359.1;AT1G58983.1;AT1G58684.1;AT1G58380.1	1906
VAENDMLLINADYQQLR	AT1G32230.1;AT1G32230.2;AT1G32230.3	1908
VAIGQVLLSVR	AT1G14320.1;AT1G66580.1;AT1G26910.1	1910
VAINGFGR	AT1G42970.1;AT1G12900.4;AT1G12900.3;AT1G12900.1;AT3G26650.1	1911
VAIVFLSR	AT3G04210.1	1912
VAKPKPESPINENEIR	AT3G07030.1	1913
VALEACVQAR	ATCG00490.1	1914
VALVNYGEDHGK	AT4G27090.1	1915
VALVVVTGDR	AT4G04640.1	1916
VALVYGQMNEPPGAR	ATCG00480.1	1917
VAMIGFAASLLGEALTGK	AT1G44575.1;AT1G44575.2	1918
VANVELYYK	AT3G11130.1;AT3G08530.1	1919
VAPTEIK	AT1G59800.1	1920
VAQTDVAYTLIK	AT3G46780.1	1921
VASEFLSNAGNAR	AT1G02080.2;AT1G02080.1	1922
VATEESSAEVTDR	AT1G76180.2;AT1G76180.1	1923
VAVIGGGPAGGAAAETLAQGGIETILIER	AT1G74470.1	1925
VAVLGAAGGIGQPLSLLIK	AT3G47520.1	1926
VAVNTTIQNER	AT4G31490.1;AT4G31480.2;AT4G31480.1	1927
VCNYVSWIK	CON__P00760	1928
VCPSHVLDFQPGDAFVVR	AT3G01500.1;AT3G01500.3;AT3G01500.2	1929
VDEIFGPINESLFSIK	AT3G03920.1;AT5G18180.1	1930
VDFAYSFFEK	AT1G43170.9;AT1G43170.8;AT1G43170.7;AT1G43170.6;AT1G43170.5;AT1G43170.3;AT1G43170.2;AT1G43170.1;AT1G43170.4	1931
VDFKEPVWFK	AT5G54270.1	1932
VDIPVDKYPNYNFVGR	AT4G26480.1	1933
VDIPVDNYPNFNFVGR	AT5G56140.1	1934
VDKKIVPR	CON__P01868;CON__P01869	1935
VDLLNQEIEFLK	CON__P35908	1936
VDPEIQNVK	CON__P35908	1937
VDVVTLGPSVR	AT2G36160.1	1938
VEAHPIPEHPRPR	AT1G74470.1	1939
VEAIGETDVYK	AT1G32870.1;AT1G32870.2	1940
VEAIGETDVYKFDPEELPEK	AT1G32870.1;AT1G32870.2	1941
VEAIGETDVYKFDPEELPEKALYK	AT1G32870.1;AT1G32870.2	1942
VEIESLFDGVDFSEPLTR	AT5G28540.1;AT1G09080.2;AT1G09080.1	1943
VEIESLFDGVDLSEPLTR	AT5G42020.1;AT5G42020.2	1944
VEIIANDQGNR	AT5G02490.1;AT1G56410.1;AT3G09440.2;AT3G09440.1;AT5G02500.1;AT5G02500.2;AT3G12580.1	1945
VELATHCR	AT1G09660.1;AT1G09660.2	1946
VENIVVIGHSACGGIK	AT5G14740.2;AT5G14740.1;AT5G14740.5;AT5G14740.4;AT5G14740.3;AT3G01500.1;AT3G01500.3;AT3G01500.2	1947
VENQDAIDAAMVGMLADPK	AT4G30190.1;AT4G30190.2;AT5G57350.2;AT5G57350.1;AT2G18960.1	1948
VENVNPGHEVVK	AT2G35840.3;AT2G35840.2;AT2G35840.1	1949
VETGMIKPGMVVTFAPTGLTTEVK	AT5G60390.3;AT5G60390.1;AT1G07940.2;AT1G07940.1;AT1G07930.1;AT1G07920.1;AT5G60390.2	1950
VETLLNLDTKPYSDR	AT5G35630.3;AT5G35630.2;AT5G35630.1	1951
VETLQLLLDR	AT4G18240.1	1952
VEVVTPEEHLGDVIGDLNSR	AT1G62750.1	1954
VFDIIYEFIPK	AT4G23670.1	1955
VFLEYADVDGSSK	AT1G60900.1;AT1G60830.1	1956
VFLLPPGASPSLDVVGHLIK	AT1G65280.1	1957
VFQQALQGAIGTLNSCLSNELHLR	ATCG00130.1	1958
VFQSTYYNR	AT2G39010.1	1959
VFSPEEISAMILTK	AT5G28540.1;AT5G42020.1;AT5G42020.2	1961
VGAATETELEDR	AT2G28000.1	1962
VGADIVKR	AT1G55490.2;AT1G55490.1	1963
VGANKFPER	AT2G45960.2;AT2G45960.1;AT2G45960.3;AT4G00430.2;AT3G61430.2;AT3G61430.1;AT1G01620.1;AT4G00430.1	1964
VGDEEGKPTVSVK	AT4G32420.2;AT4G32420.3;AT4G32420.1	1965
VGDPVEVR	AT1G79930.2;AT1G79930.1;AT1G79920.2;AT1G79920.1	1966
VGFAEAAR	CON__P07339	1968
VGGASESEVGER	AT3G13860.1	1969
VGINMAIAAVVSDLK	AT3G13860.1	1970
VGKEGVITIQDGK	AT3G23990.1	1971
VGLTALTMAEYFR	ATCG00480.1	1972
VGVAGVMSHISTGGGASLELLEGK	AT3G12780.1;AT1G56190.2;AT1G56190.1	1973
VGYPVNTDALDALYEK	AT3G25860.1	1974
VHACVGGTSVR	AT1G54270.1;AT1G54270.2;AT3G13920.1;AT3G13920.3;AT3G13920.4;AT3G13920.2	1975
VIAWYDNEWGYSQR	AT1G12900.4;AT1G12900.3;AT1G12900.1;AT1G12900.2;AT3G26650.1	1976
VIDLFSSPDVVK	AT3G47370.3;AT3G47370.2;AT3G47370.1;AT5G62300.2;AT5G62300.1;AT3G45030.1	1977
VIEVEGPR	AT1G33140.1;AT1G33120.1;AT4G10450.1	1978
VIFAWLAYK	AT5G60790.1	1979
VIGPAMPSAELLAAAAK	AT1G65280.1	1980
VIHCDSRPVGEK	AT1G32870.1;AT1G32870.2	1982
VIHCDSRPVGEKK	AT1G32870.1;AT1G32870.2	1983
VIITAPAK	AT1G42970.1	1984
VIKDVLGDKVEK	AT5G56030.1;AT5G56010.1;AT5G56000.1;AT5G56030.2	1985
VIMGNMELLR	AT1G32230.1;AT1G32230.2;AT1G32230.3	1986
VIMPLEMILTSYK	AT3G57150.1	1987
VINALANPIDGR	ATCG00120.1	1988
VINDRFGIVEGLMTTVHSITATQK	AT1G13440.1;AT3G04120.1	1989
VINTWADIINR	ATCG00020.1	1990
VIRLDVPVDKYPSYNFVGR	AT1G09660.1;AT1G09660.2	1991
VISELGDSAFEDQCGR	AT3G01500.1;AT3G01500.3;AT3G01500.2	1992
VISWSSAGTCGFR	ATCG00750.1	1994
VITDAIPETVGGK	AT2G39800.2;AT2G39800.3;AT2G39800.4;AT2G39800.1;AT3G55610.1;AT3G55610.2	1995
VIVGDDLLR	AT1G32230.1;AT1G32230.2;AT1G32230.3	1996
VIVSENHVEK	AT2G35510.1	1997
VKDEIVLDGNDIELVSR	AT1G33140.1;AT1G33120.1	1998
VLAESESSAFEDQCGR	AT5G14740.2;AT5G14740.1;AT5G14740.5;AT5G14740.4;AT5G14740.3	1999
VLAFANLVYSILTK	AT1G70320.1;AT1G55860.2;AT1G55860.1	2000
VLAHTQIR	AT1G43170.9;AT1G43170.8;AT1G43170.7;AT1G43170.6;AT1G43170.5;AT1G43170.3;AT1G43170.2;AT1G43170.1;AT1G43170.4;AT1G61580.1	2001
VLDEEFGIVK	AT1G42970.1	2002
VLDELTLAR	CON__P02533;CON__Q6IFX2;CON__P19012;CON__P08727;CON__P19001;CON__Q04695;CON__Q9QWL7;CON__P08779	2003
VLDELTLTK	CON__P13645	2004
VLDKPFLMPIEDVFSIQGR	AT4G02930.1	2005
VLDVLQK	AT1G74470.1	2006
VLEAVHIASNK	AT4G37930.1	2007
VLEFNNLLVSLK	AT1G06950.1	2008
VLEHCHNPDTQSK	AT2G29140.1	2009
VLELALK	AT2G33210.2;AT2G33210.1;AT3G23990.1	2010
VLELALKK	AT2G33210.2;AT2G33210.1	2011
VLELALKR	AT3G23990.1	2012
VLENLGADPSNIR	AT5G50920.1;AT3G48870.2;AT3G48870.1	2013
VLEQLSGQTPVFSK	AT5G45775.1;AT5G45775.2;AT4G18730.1;AT3G58700.1;AT2G42740.1	2014
VLEVNVEK	AT3G44110.2;AT5G22060.1;AT3G44110.1	2015
VLFVPWVETDFR	AT4G03280.2;AT4G03280.1	2016
VLITAPGK	AT1G12900.4;AT1G12900.3;AT1G12900.1;AT1G12900.2	2017
VLITTDLLAR	AT1G54270.1;AT1G54270.2;AT3G13920.1;AT3G13920.3;AT3G13920.4;AT3G13920.2;AT1G72730.1	2018
VLLLVWDDR	AT3G15730.1	2019
VLLLVWDDRTSVDVLK	AT3G15730.1	2020
VLLLVWDDRTSVDVLKK	AT3G15730.1	2021
VLNMVDGVLLVVDSVEGPMPQTR	AT5G13650.1;AT5G13650.2	2023
VLPGVIALDEAIPVTV	AT3G12780.1	2024
VLQFAGIDDVFTSSR	AT2G41840.1;AT3G57490.1;AT1G59359.1;AT1G58983.1;AT1G58684.1;AT1G58380.1	2025
VLSTEQDPSAKR	AT4G31490.1;AT4G31480.2;AT4G31480.1	2026
VLVDKNADVNAKDNEGQTPLHYAVVCDR	AT4G27780.1	2027
VLVLLDDLSLK	AT5G66680.1	2028
VLVNIEQQSPDIAQGVHGHLTK	AT3G17390.1	2029
VMVTPEEVITR	AT5G20490.2;AT5G20490.1	2030
VNFTEEDLLINFLAAVK	AT3G63490.1	2031
VNGGGHTSQVYAIR	AT5G18380.2;AT5G18380.1;AT5G18380.3;AT2G09990.1	2032
VNSAAFPAPIEK	CON__P01868;CON__P01869	2033
VNSAAFPAPIEKTISK	CON__P01868;CON__P01869	2034
VNSAAFPAPIEKTISKTK	CON__P01868;CON__P01869	2035
VNVIGVVDVYK	AT1G34190.1	2036
VNVYYNEASCGR	AT2G29550.1;AT5G12250.1	2037
VPFLDKEFLNVAMSIDPEWK	AT5G65010.1;AT5G65010.2	2038
VPGNENPSILISFASK	AT3G11130.1;AT3G08530.1	2039
VPIICTGNDFSTLYAPLIR	AT2G39730.2;AT2G39730.3;AT2G39730.1	2040
VPLILGIWGGK	AT2G39730.2;AT2G39730.3;AT2G39730.1	2041
VPLQTIEAK	ATCG00800.1	2042
VPTPNVSVVDLVINVEK	AT1G42970.1	2043
VPTPNVSVVDLVINVEKK	AT1G42970.1	2044
VPTPNVSVVDLVVQVSK	AT1G12900.4;AT1G12900.3;AT1G12900.1;AT1G12900.2;AT3G26650.1	2045
VPTPNVSVVDLVVQVSKK	AT1G12900.4;AT1G12900.3;AT1G12900.1;AT1G12900.2;AT3G26650.1	2046
VPTVDVSVVDLTVR	AT1G13440.1;AT1G13440.2;AT3G04120.1	2047
VPVFLDGGVR	AT3G14415.3;AT3G14415.1;AT3G14415.2	2048
VQAIADAAR	AT5G66420.1;AT5G66420.2	2049
VQALEEANNDLENK	CON__P35527	2050
VQEWQELK	AT1G20920.1;AT3G09620.1	2051
VQEWQELKR	AT1G20920.1;AT3G09620.1	2052
VQLAETYLSQAALGDANADAIGR	AT2G39730.2;AT2G39730.3;AT2G39730.1	2053
VQQLLQDFFNGK	AT5G02490.1;AT1G56410.1;AT5G02500.1;AT5G02500.2;AT3G12580.1	2054
VQQLLQDFFNGKELCK	AT5G02490.1;AT1G56410.1;AT5G02500.1;AT5G02500.2;AT3G12580.1	2055
VQQLLVDFFNGK	AT3G09440.2;AT3G09440.1	2056
VQQLLVDFFNGKELCK	AT3G09440.2;AT3G09440.1	2057
VQVEIPK	AT4G39960.1;AT2G22360.1	2058
VQVGNSPVYK	AT5G18190.1;AT3G03940.1	2059
VRGEEPPAELLAQER	AT1G03910.1;AT1G03910.2	2060
VSEQFTAMFR	AT5G44340.1;AT5G62700.1;AT5G62690.1;AT1G20010.1;AT2G29550.1;AT5G12250.1	2061
VSGEVPWFGIEQEYTLLQQNVK	AT5G35630.3;AT5G35630.2;AT5G35630.1	2062
VSGMMSNQGFGDFDR	AT2G38610.2;AT2G38610.1	2063
VSGMMSNQGFGDFDRLR	AT2G38610.2;AT2G38610.1	2064
VSGVSLLALFK	AT5G02960.1;AT3G09680.1	2065
VSKGEELFTGVVPILVELDGDVNGHK	CON__PSB_N_GS_green;CON__PSB_N_GS_yellow;CON__PSB_N_GFP;CON__PSB_C_GFP	2066
VSLAGACGVGGYGSR	CON__P13647	2067
VSLYQDAHIPDNFVPR	AT3G15730.1	2068
VSSFPDLDR	AT1G09660.1;AT1G09660.2	2069
VSSFPDLDRYEHGSPFR	AT1G09660.1;AT1G09660.2	2070
VSVLQAANLK		2071
VTCVVVDISK	CON__P01868;CON__P01869	2072
VTCVVVDISKDDPEVQFSWFVDDVEVHTAQTQPR	CON__P01868;CON__P01869	2073
VTDALNATK	AT2G33210.2;AT2G33210.1;AT3G23990.1	2074
VTDALNATR	AT3G13860.1	2075
VTDELFDEIATK	AT1G70620.2;AT1G70620.1;AT1G70620.3	2076
VTELPGYIK	AT4G30010.1	2077
VTGGEVGAASSLAPK	AT5G60670.1;AT3G53430.1;AT2G37190.1	2078
VTKDGVTVAK	AT2G33210.2;AT2G33210.1;AT3G23990.1	2079
VTMQNLNDR	CON__P13645;CON__P02535;CON__Q148H6;CON__Q7Z3Y7;CON__Q7Z3Z0;CON__Q7Z3Y8;CON__Q7Z3Y9;CON__P02533;CON__P08779;CON__Q9Z2K1;CON__Q3ZAW8	2080
VTPQPGVPPEEAGAAVAAESSTGTWTTVWTDGLTSLDR	ATCG00490.1	2081
VTPQPGVPPEEAGAAVAAESSTGTWTTVWTDGLTSLDRYK	ATCG00490.1	2082
VTRPHGNSGVVR	AT3G55750.1;AT1G41880.1;AT1G74270.1;AT1G07070.1	2083
VTTLLENALSQSR	AT4G26480.1	2084
VTVSKDDTVILDGAGDKK	AT3G23990.1	2085
VVAAFAER	AT3G11130.1;AT3G08530.1	2086
VVAAFLLAVLSGK	AT2G27720.1;AT2G27720.3;AT2G27720.2	2087
VVAAGANPVLITR	AT1G55490.2;AT1G55490.1;AT3G13470.1;AT5G56500.2;AT5G56500.1	2088
VVAAYLLAVLSGK	AT2G27710.4;AT2G27710.3;AT2G27710.2;AT2G27710.1	2089
VVAEAAQAAAR	AT1G13930.3;AT1G13930.2;AT1G13930.1	2090
VVAWYDNEWGYSQR	AT1G42970.1	2091
VVDAMGVPIDGK	ATMG01190.1;AT2G07698.1	2092
VVDEGYNPSYGAR	AT5G50920.1	2093
VVDLADIVANNWK	AT1G12900.4;AT1G12900.3;AT1G12900.1;AT1G12900.2;AT3G26650.1	2094
VVDLAHLVASK	AT1G42970.1	2095
VVDLIVHMSK	AT1G13440.1;AT1G13440.2;AT3G04120.1	2096
VVDLIVHMSKA	AT1G13440.1;AT1G13440.2;AT3G04120.1	2097
VVDLLAPYR	ATCG00480.1	2098
VVDLLAPYRR	ATCG00480.1	2099
VVDLSASLNAAEEEKK	AT5G41790.1	2100
VVDVFIPR	AT5G64200.2;AT5G64200.1	2101
VVDVGGGTGFTTLGIVK	AT3G63410.1	2102
VVDWLASTFK	AT5G49910.1	2103
VVEVEDIQR	AT5G67630.1	2105
VVEVNALAK	AT5G17920.2;AT5G17920.1;AT5G20980.2;AT5G20980.1	2106
VVEYWEAVLK	AT1G03910.1;AT1G03910.2	2107
VVIEHGAVPIFVQLLASQSDDVR	AT4G16143.2;AT4G16143.1	2109
VVISAPSKDAPMFVVGVNEHEYK	AT1G13440.1;AT3G04120.1	2110
VVLDMTTLTIMR	AT1G45000.2;AT5G43010.1;AT1G45000.1	2111
VVLQRDDVELVAVNDPFITTEYMTYMFK	AT1G13440.1;AT1G13440.2;AT3G04120.1	2112
VVNDGVTIAR	AT2G28000.1	2113
VVQILGR	AT5G50920.1	2114
VVVANVTGR	AT1G36160.2;AT1G36160.1;AT1G36180.1	2115
VVVPESVLK	AT2G01250.1;AT2G44120.1;AT2G44120.2;AT2G01250.2	2116
VYADAIAR	AT3G46780.1	2117
WAMLGAAGFIIPEALNK	AT4G10340.1	2119
WAMLGALGCVFPELLAR	AT2G34420.1;AT2G34430.1;AT1G29930.1;AT1G29920.1;AT1G29910.1	2120
WAMLGVAGMLLPEVFTK	AT3G47470.1	2121
WDETDAIVVSGAK	AT1G32230.1;AT1G32230.2;AT1G32230.3	2122
WFDTNYHYIVPELGPEVNFSYASHK	AT5G17920.2;AT5G17920.1	2123
WFLPFDHSQESK	AT5G26000.2;AT5G26000.1	2124
WIDALSDPR	AT4G35090.1;AT4G35090.2	2126
WIPCVEFELEHGFVYR	AT1G67090.1;AT5G38420.1;AT5G38410.1;AT5G38430.1	2127
WKIDGSER	CON__P01837	2128
WLAYGEIINGR	AT1G61520.2;AT1G61520.3;AT1G61520.1	2129
WLGGMLTNWSTTEK	ATCG00160.1	2130
WLGGMLTNWSTTEKR	ATCG00160.1	2131
WLVLIGIAPGSPER	AT3G11130.1;AT3G08530.1	2132
WNYDGSSTGQAPGEDSEVILYPQAIFRDPFR	AT5G35630.3;AT5G35630.2;AT5G35630.1	2133
WSELHLGSNPTERSTR	ATCG01280.1;ATCG00860.1	2134
WSELHLGSNPTERSTRDQK	ATCG01280.1;ATCG00860.1	2135
WSPELAAACEVWK	ATCG00490.1	2136
WTLLQEQGTK	CON__P02538;CON__P04259;CON__P13647	2137
YAWLPAKR	AT1G32230.1;AT1G32230.2;AT1G32230.3	2139
YAWVPAKK	AT2G35510.1	2140
YCDIDDNGVR	AT2G35510.1	2141
YCDVDENGVR	AT1G32230.1;AT1G32230.2;AT1G32230.3	2142
YCGQLQMIQEQISNLEAQITDVR	CON__P35527	2143
YCVQLSQIQAQISALEEQLQQIR	CON__P13645	2144
YDEIIKEVSSYLK	AT5G60390.3;AT5G60390.1;AT1G07940.2;AT1G07940.1;AT1G07930.1;AT1G07920.1;AT1G07930.2;AT5G60390.2	2146
YDSMLGTFK	AT1G42970.1	2147
YDSTLGIFDADVKPSGDSALSVDGK	AT1G12900.4;AT1G12900.3;AT1G12900.1	2148
YDSTLGIFDADVKPSGETAISVDGK	AT3G26650.1	2149
YDSVHGQWK	AT1G13440.1;AT1G13440.2;AT3G04120.1	2150
YEDEINKR	CON__P04264;CON__Q6IFZ6;CON__P35908;CON__Q01546;CON__P02538;CON__O95678;CON__Q8VED5;CON__P04259;CON__P13647;CON__Q7Z794	2152
YEELQQTAGR	CON__P13647	2153
YEELQVTAGR	CON__P02538;CON__O95678;CON__P04259	2154
YEGVILNK	AT5G45775.1;AT5G45775.2;AT4G18730.1;AT3G58700.1;AT2G42740.1	2155
YEHGSPFR	AT1G09660.1;AT1G09660.2	2156
YGAGIGPGVYDIHSPR	AT5G17920.2;AT5G17920.1;AT3G03780.3;AT3G03780.2;AT3G03780.1;AT5G20980.2;AT5G20980.1	2158
YGGVGAAIEYAVLHLK	AT3G01500.1;AT3G01500.3;AT3G01500.2	2161
YGLLCGSDGLPHLIVNGDQR	AT1G31330.1	2162
YGRPLLGCTIKPK	ATCG00490.1	2163
YIAPEQVPVK	AT1G72150.1	2165
YIEAGVSEHAK	AT1G15690.1	2166
YKEAAELAAESPQGILR	AT3G11130.1;AT3G08530.1	2167
YKELQDIIAILGLDELSEEDRLTVAR	ATCG00480.1	2168
YKESELIHCR	AT3G54890.3;AT3G54890.2;AT3G54890.4;AT3G54890.1	2169
YLDGLTAER	CON__P35908	2171
YLEAGTLPTAK	AT4G04640.1	2172
YLFAGVVDGR	AT5G17920.2;AT5G17920.1;AT3G03780.3;AT3G03780.2;AT3G03780.1	2173
YLGPFSGESPSYLTGEFPGDYGWDTAGLSADPETFAR	AT1G29930.1;AT1G29920.1;AT1G29910.1	2174
YLQDYFSNILKK	AT4G35250.1	2175
YLSELLAER	AT5G56140.1;AT4G26480.1	2176
[truncated: 23 more rows]

## Sheet: coverage of identified proteins
	AT1G32870	ANAC013
		overview detected peptides	CGGEDVKDAYVLYK	GLNQSELDDNDIEELMSQVR	STGNNVVVMDSDSAVK
			DAYVLYK	KLRVEAIGETDVYK	STGNNVVVMDSDSAVKR
			DLSVENGGLAPGFR	KTLVFHR	TNWVMHEYTLHK
			DRQWFFFSLR	LRVEAIGETDVYK	TNWVMHEYTLHKEELK
			DRVIHCDSRPVGEK	LRVEAIGETDVYKFDPEELPEK	TNWVMHEYTLHKEELKR
			FASSVWTFLESIPAK	NGFAQSLQVNTSLMTYQANNNQFQQQSGK	VEAIGETDVYK
			FASSVWTFLESIPAKPAYASENPFVK	NQASNWPLR	VEAIGETDVYKFDPEELPEK
			FDPEELPEK	QINNGSSWVQELNNDGLTVTR	VIHCDSRPVGEK
			FGEAPGTGDSSEFLNPVPSGISTTNEDDPSKDESSK	QWFFFSLR	VIHCDSRPVGEKK
			FHPTDEELVVYYLK	RCGGEDVKDAYVLYK
			FHPTDEELVVYYLKR	VEAIGETDVYKFDPEELPEKALYK
		overview full protein with detected peptides	MDLSVENGGLAPGFRFHPTDEELVVYYLKRKIRRKKLRVEAIGETDVYKFDPEELPEKALYKTRDRQWFFFSLRDRKHGSRSSRATERGYWKATGKDRVIHCDSRPVGEKKTLVFHRGRAPNGERTNWVMHEYTLHKEELKRCGGEDVKDAYVLYKIYKKSGSGPKNGEQYGAPFIEEEWAEDDDDDVDEPANQLVVSASVDNSLWGKGLNQSELDDNDIEELMSQVRDQSGPTLQQNGVSGLNSHVDTYNLENLEEDMYLEINDLMEPEPEPTSVEVMENNWNEDGSGLLNDDDFVGADSYFLDLGVTNPQLDFVSGDLKNGFAQSLQVNTSLMTYQANNNQFQQQSGKNQASNWPLRNSYTRQINNGSSWVQELNNDGLTVTRFGEAPGTGDSSEFL…
	AT1G32230	RCD1
		overview detected peptides	AASYAAYVTGVSCAK	KMFAVGTASLGHVPVLDVGR	SIYGVGIHLTAADCPYFSAR
			AQFFSGGEEYDNGVDDIESPK	KSIYGVGIHLTAADCPYFSAR	SKEIPGSIRDHEEGAGGL
			CFFPEIYESDER	LCGHSFILDFLHMQR	SPWMPFPTLFAAISHK
			CVEDPKQNAPHDIK	LEIDVNGGETPR	STITTLQNQPK
			DLPPQLESNQGAR	LQNVPPPNGQCQIPDKR	TPLAWIDNAGK
			DNSGVTLEGPK	LRLEIDVNGGETPR	VAENDMLLINADYQQLR
			DNSGVTLEGPKDLPPQLESNQGAR	LSNLPNAEGNLIAK	VIMGNMELLR
			EVLSAVMMQGLGVGGAFIR	LTGSEVLDKDAVKK	VIVGDDLLR
			EVLSAVMMQGLGVGGAFIRK	MFAVGTASLGHVPVLDVGR	WDETDAIVVSGAK
			FKLSNLPNAEGNLIAK	NYIVWNINMNTHIFPEFVVR	YAWLPAKR
			FSSEIAEAR	RDNSGVTLEGPK	YCDVDENGVR
			GDKAQFFSGGEEYDNGVDDIESPK	SAAIEFK	YYTYFKK
		overview full protein with detected peptides	MEAKIVKVLDSSRCEDGFGKKRKRAASYAAYVTGVSCAKLQNVPPPNGQCQIPDKRRRLEGENKLSAYENRSGKALVRYYTYFKKTGIAKRVMMYENGEWNDLPEHVICAIQNELEEKSAAIEFKLCGHSFILDFLHMQRLDMETGAKTPLAWIDNAGKCFFPEIYESDERTNYCHHKCVEDPKQNAPHDIKLRLEIDVNGGETPRLNLEECSDESGDNMMDDVPLAQRSSNEHYDEATEDSCSRKLEAAVSKWDETDAIVVSGAKLTGSEVLDKDAVKKMFAVGTASLGHVPVLDVGRFSSEIAEARLALFQKQVEITKKHRGDANVRYAWLPAKREVLSAVMMQGLGVGGAFIRKSIYGVGIHLTAADCPYFSARYCDVDENGVRYMVLCRVIMGNM…
	AT1G34190	ANAC017
		overview detected peptides	ADSSPDSCFK
			CKNPQEYYALYK
			FSAPGFR
			QWFYFTPR
			VNVIGVVDVYK
		overview full protein with detected peptides	MADSSPDSCFKGGKFSAPGFRFHPTDEELVMYYLKRKICRKRLRVNVIGVVDVYKMDPEELPGQSMLKTGDRQWFYFTPRSRKYPNAARSNRGTENGYWKATGKDRVIEYNSRSVGLKKTLVFYRGRAPSGERTDWVMHEYTMDEDELGRCKNPQEYYALYKLFKKSGAGPKNGEQYGAPFQEEEWVDDDNEDVNAIAVAVPEQPVVRYEDARRVDERRLFNPVILQLEDIDELLNGIPNAPGVPQRCIPQVNSEEELQSTLVNNSAREFLPNGQQYNRPSSFDSLETAEVTSAPLVFEKEDFIEMDDLLLIPEFGASSTEKAAQFSNHGEFDDFNEFDQLFHDVSMSLDMEPIDQGTSANLSSLSDSANYTSDQKQQLLYQQFQDQTPENQLNNIMDP…
	AT2G35510	SRO1
		overview detected peptides	EVLSAVMMHGLGVGGAFIK	VIVSENHVEK
			HFLLDFLHMYR	YAWVPAKK
			KHPGNYTPYDSGR	YCDIDDNGVR
			SPIMPFPLLFK
			TLSMIVGDDDLLISTITGLQR
		overview full protein with detected peptides	MEAKIVKVSDSSYKDGLGKKRKHPGNYTPYDSGRSYAKLQWVLSPNSSTQKLEKRRNLDGENKVIVSENHVEKSLVRYFSYYKKTGVPKRVMFHENGEWIDLPDHILCDIRNDLEAKRATIEFNWCGRHFLLDFLHMYRLDLETGVKTQLAWIDIAGKCFFPETFDTLERDGCHHIRGEDPEQHDQREIKLHIEIDVNSGELPRLNLNVVTDESGDNMDDFQAVQRSSNGPNDEASEDSCSRELDDAVEKWDKTETDRFSGVKPAEEELDKDAVKQMFALGAATLGHVESLDVYQFSSEIAKARLSLFQKQADITKKHRGDANIRYAWVPAKKEVLSAVMMHGLGVGGAFIKKSMYGVGVHAANCPYFSARYCDIDDNGVRHMVLCRVIMGNMEPLRGD…

## Sheet: stickiness
At#	Uniprot	Table::Short description	Average Ratio	Stickiness
AT1G01090	O24457	PDH-E1 ALPHA (PYRUVATE DEHYDROGENASE E1 ALPHA); pyruvate dehydrogenase (acetyl-transferring)	26.7416	0.08
AT1G01560	Q9LMM5	ATMPK11; MAP kinase/ kinase	14	0.01
AT1G01620	Q08733	PIP1C (PLASMA MEMBRANE INTRINSIC PROTEIN 1C); water channel	19.3642	0.36
AT1G01660	P0C6E7	U-box domain-containing protein
AT1G02500	P23686	SAM1 (S-ADENOSYLMETHIONINE SYNTHETASE 1); methionine adenosyltransferase	37.6749	0.31
AT1G02840	O22315	SR1; RNA binding / nucleic acid binding / nucleotide binding	3.44218	0.15
AT1G03910	Q9ZWB1		5.5351	0.28
AT1G04160	O64491	XIB (MYOSIN XI B); motor	69.1508	0.09
AT1G04270	Q08112	RPS15 (CYTOSOLIC RIBOSOMAL PROTEIN S15); structural constituent of ribosome	69.6534	0.56
AT1G04410	P93819	malate dehydrogenase, cytosolic, putative	10.4757	0.37
AT1G04820	P29510	TUA4; structural constituent of cytoskeleton	49.7044	0.62
AT1G06680	Q42029	PSBP-1 (PHOTOSYSTEM II SUBUNIT P-1); poly(U) binding	9.74834	0.17
AT1G06950	Q8LPR9	TIC110 (TRANSLOCON AT THE INNER ENVELOPE MEMBRANE OF CHLOROPLASTS 110)	98.4441	0.04
AT1G07070	Q9LMK0	60S ribosomal protein L35a (RPL35aA)	33.0989	0.16
AT1G07660	P59259	histone H4	17.8246	0.72
AT1G07790	Q9LQQ4	HTB1; DNA binding	15.2291	0.59
AT1G07920	P13905	elongation factor 1-alpha / EF-1-alpha	14.4283	0.72
AT1G07990	Q8L7T5	SIT4 phosphatase-associated family protein
AT1G08380	Q949Q5	PSAO (photosystem I subunit O)	3.0169	0.03
AT1G09080	Q8H1B3	BIP3; ATP binding	14.4657	0.33
AT1G09340	Q9SA52	CRB (CHLOROPLAST RNA BINDING); binding / catalytic/ coenzyme binding	814.873	0.11
AT1G09660	Q8GWR3	KH domain-containing quaking protein, putative	99072.9	0.01
AT1G10630	Q6ID97	ATARFA1F (ARABIDOPSIS THALIANA ADP-RIBOSYLATION FACTOR A1F); GTP binding / copper ion binding / phospholipase activator/ protein binding	45.9443	0.48
AT1G10730	Q9SAC9	clathrin adaptor complexes medium subunit family protein
AT1G11860	O65396	aminomethyltransferase, putative	333.781	0.13
AT1G12900	Q9LPW0	GAPA-2 (GLYCERALDEHYDE 3-PHOSPHATE DEHYDROGENASE A SUBUNIT 2); NAD or NADH binding / binding / catalytic/ glyceraldehyde-3-phosphate dehydrogenase (phosphorylating)/ glyceraldehyde-3-phosphate dehydrogenase	58.3807	0.36
AT1G13320	Q38951	PP2AA3 (PROTEIN PHOSPHATASE 2A SUBUNIT A3); binding / protein phosphatase type 2A regulator	3.29595	0.03
AT1G13440	Q56WJ4	GAPC2 (GLYCERALDEHYDE-3-PHOSPHATE DEHYDROGENASE C2); NAD or NADH binding / binding / catalytic/ glyceraldehyde-3-phosphate dehydrogenase (phosphorylating)/ glyceraldehyde-3-phosphate dehydrogenase	67.7044	0.71
AT1G13930	Q9XI93		16.8895	0.23
AT1G14320	Q93VT9	SAC52 (SUPPRESSOR OF ACAULIS 52); structural constituent of ribosome	18.8691	0.54
AT1G14580	Q8RWX7	zinc finger (C2H2 type) family protein	95.24	0.17
AT1G15690	P31414	AVP1; ATPase/ hydrogen-translocating pyrophosphatase	10.6826	0.24
AT1G15730	Q9LMR1	PRLI-interacting factor L, putative
AT1G15820	Q9LMQ2	LHCB6 (LIGHT HARVESTING COMPLEX PSII SUBUNIT 6); chlorophyll binding	22.1325	0.33
AT1G16030	Q9S9N1	Hsp70b (heat shock protein 70B); ATP binding	39.4613	0.36
AT1G16610	Q9SEE9	SR45; RNA binding / protein binding	4.57689	0.16
AT1G17100	Q9SHG8	SOUL heme-binding family protein	2.59466	0.01
AT1G17260	Q43128	AHA10 (Autoinhibited H(+)-ATPase isoform 10); ATPase/ ATPase, coupled to transmembrane movement of ions, phosphorylative mechanism / cation-transporting ATPase	51.0115	0.21
AT1G18540	Q9FZ76	60S ribosomal protein L6 (RPL6A)	7.22534	0.54
AT1G20010	P29513	TUB5; structural constituent of cytoskeleton	459.213	0.4
AT1G20260	Q8W4E2	hydrogen ion transporting ATP synthase, rotational mechanism / hydrolase, acting on acid anhydrides, catalyzing transmembrane movement of substances / proton-transporting ATPase, rotational mechanism	327.157	0.33
AT1G20340	P42699	DRT112; copper ion binding / electron carrier	15.4218	0.11
AT1G20440	P31168	COR47 (COLD-REGULATED 47)	11.9197	0.31
AT1G20620	Q42547	CAT3 (CATALASE 3); catalase	10.9541	0.33
AT1G20630	Q96528	CAT1 (CATALASE 1); catalase	291.173	0.17
AT1G20920	Q8H0U8	DEAD box RNA helicase, putative	3.81808	0.43
AT1G22300	P48347	GRF10 (GENERAL REGULATORY FACTOR 10); ATP binding / protein binding / protein phosphorylated amino acid binding	61.4491	0.4
AT1G22530	Q56ZI2	PATL2 (PATELLIN 2); transporter	11.8258	0.13
AT1G23410	P59271	ubiquitin extension protein, putative / 40S ribosomal protein S27A (RPS27aA)	10.8907	0.6
AT1G23490	Q9SRC3	ATARF1 (ADP-RIBOSYLATION FACTOR 1); GTP binding / phospholipase activator/ protein binding	48.727	0.45
AT1G24460	Q9FYL7	unknown protein
AT1G25490	Q38845	RCN1 (ROOTS CURL IN NPA); protein phosphatase type 2A regulator	10.6191	0.09
AT1G26480	Q9C5W6	GRF12 (GENERAL REGULATORY FACTOR 12); protein binding / protein phosphorylated amino acid binding	40.1579	0.41
AT1G26630	Q93VP3	FBR12 (FUMONISIN B1-RESISTANT12); translation initiation factor	9.75159	0.44
AT1G26910	Q08770	60S ribosomal protein L10 (RPL10B)	18.095	0.57
AT1G27400	Q93VI3	60S ribosomal protein L17 (RPL17A)	43.3248	0.53
AT1G29150	Q9LP45	ATS9 (ARABIDOPSIS NON-ATPASE SUBUNIT 9)	17.004	0.13
AT1G29250	Q9LP53	nucleic acid binding	51.7724	0.23
AT1G29740	Q9C6G5	kinase
AT1G29965	Q8L7K0	60S ribosomal protein L18A (RPL18aA)	17.1052	0.48
AT1G29970	Q8L9S1	RPL18AA (60S RIBOSOMAL PROTEIN L18A-1); structural constituent of ribosome	17.1052	0.48
AT1G30120	Q9C6Z3	PDH-E1 BETA (PYRUVATE DEHYDROGENASE E1 BETA); pyruvate dehydrogenase (acetyl-transferring)	16.6239	0.08
AT1G30380	Q9SUI5	PSAK (photosystem I subunit K)	93.6064	0.11
AT1G30630	Q9SA78	coatomer protein epsilon subunit family protein / COPE family protein	29.3838	0.12
AT1G31330	Q9SHE8	PSAF (photosystem I subunit F)	16.2392	0.4
AT1G31340	Q9M1P9	RUB1 (RELATED TO UBIQUITIN 1); protein binding	11.3518	0.59
AT1G32060	P25697	PRK (PHOSPHORIBULOKINASE); ATP binding / phosphoribulokinase/ protein binding	14.066	0.08
AT1G32230	Q93YR6	RCD1 (RADICAL-INDUCED CELL DEATH1); protein binding	13652.9	0.01
AT1G32870	Q94CC7	ANAC013 (Arabidopsis thaliana NAC domain protein 13); transcription factor	48562.1	0.01
AT1G34190	Q9XIC5	ANAC017 (Arabidopsis NAC domain containing protein 17); transcription factor	308.8	0.01
AT1G34430	Q9C8P0	EMB3003 (embryo defective 3003); acyltransferase/ dihydrolipoyllysine-residue acetyltransferase/ protein binding	28.5546	0.16
AT1G34760	Q9S9Z8	GRF11 (GENERAL REGULATORY FACTOR 11); ATPase binding / amino acid binding / protein binding / protein phosphorylated amino acid binding	24.3405	0.31
AT1G35160	P46077	GF14 PHI (GF14 PROTEIN PHI CHAIN); protein binding / protein phosphorylated amino acid binding	42.2794	0.47
AT1G36160	Q38970	ACC1 (ACETYL-COENZYME A CARBOXYLASE 1); acetyl-CoA carboxylase	4.14434	0.02
AT1G36180	B3H4A7	ACC2 (ACETYL-COA CARBOXYLASE 2); acetyl-CoA carboxylase	7.1331	0.01
AT1G41880	Q9FZH0	60S ribosomal protein L35a (RPL35aB)	6.10725	0.16
AT1G42970	P25857	GAPB (GLYCERALDEHYDE-3-PHOSPHATE DEHYDROGENASE B SUBUNIT); glyceraldehyde-3-phosphate dehydrogenase (NADP+)/ glyceraldehyde-3-phosphate dehydrogenase	17.2478	0.45
AT1G43170	P17094	ARP1 (ARABIDOPSIS RIBOSOMAL PROTEIN 1); structural constituent of ribosome	4.94272	0.58
AT1G43190	Q6ICX4	polypyrimidine tract-binding protein, putative / heterogeneous nuclear ribonucleoprotein, putative
AT1G44575	Q9XF91	NPQ4 (NONPHOTOCHEMICAL QUENCHING); chlorophyll binding / xanthophyll binding	12.1386	0.18
AT1G44910	B3H7M9	protein binding	6.35468	0.51
AT1G45000	Q9MAK9	26S proteasome regulatory complex subunit p42D, putative	13.1182	0.18
AT1G48830	Q9C514	40S ribosomal protein S7 (RPS7A)	41.3046	0.58
AT1G48920	Q9FVQ1	ATNUC-L1; nucleic acid binding / nucleotide binding	49.4064	0.55
AT1G49240	Q96293	ACT8 (ACTIN 8); copper ion binding / structural constituent of cytoskeleton	34.1824	0.47
AT1G51420	Q9C8J4	SPP1 (SUCROSE-PHOSPHATASE 1); catalytic/ magnesium ion binding / phosphatase/ sucrose-phosphatase
AT1G51500	Q9C8K2	CER5 (ECERIFERUM 5); ATPase, coupled to transmembrane movement of substances
AT1G52360	Q9C827	coatomer protein complex, subunit beta 2 (beta prime), putative	25.8776	0.14
AT1G53080	Q9LNN3	legume lectin family protein	3.90014	0.16
AT1G53590	Q93XX4	NTMC2T6.1
AT1G54270	P41377	EIF4A-2; ATP-dependent helicase/ translation initiation factor	29.5358	0.72
AT1G54410	Q9SLJ2	dehydrin family protein	8.67578	0.22
AT1G55060	Q3E7K8	UBQ12 (UBIQUITIN 12); protein binding	11.3518	0.59
AT1G55490	P21240	CPN60B (CHAPERONIN 60 BETA); ATP binding / protein binding	31.8892	0.45
AT1G55670	Q9S7N7	PSAG (PHOTOSYSTEM I SUBUNIT G)	14.279	0.3
AT1G55860	Q8GY23	UPL1 (UBIQUITIN-PROTEIN LIGASE 1); ubiquitin-protein ligase	10.8582	0.03
AT1G56070	Q9ASR1	LOS1; copper ion binding / translation elongation factor/ translation factor, nucleic acid binding	47.99	0.69
AT1G56190	P50318	phosphoglycerate kinase, putative	9.86944	0.23
AT1G56410	Q9C7X7	ERD2 (EARLY-RESPONSIVE TO DEHYDRATION 2); ATP binding	40.5736	0.45
AT1G58380	Q8L8Y0	XW6; structural constituent of ribosome	55.7275	0.53
AT1G59610	Q9LQ55	ADL3 (ARABIDOPSIS DYNAMIN-LIKE 3); GTPase	14.5856	0.19
AT1G59800	Q9XIE8	cullin-related
AT1G60780	O22715	HAP13 (HAPLESS 13); protein binding
AT1G60830	Q9C6C1	U2 snRNP auxiliary factor large subunit, putative	37.3237	0.34
AT1G60900	Q8L716	U2 snRNP auxiliary factor large subunit, putative	50.1586	0.49
AT1G61520	Q9SY97	LHCA3; chlorophyll binding	50.4312	0.33
AT1G61580	P22738	RPL3B (R-PROTEIN L3 B); structural constituent of ribosome	5.02374	0.56
AT1G62020	Q94A40	coatomer protein complex, subunit alpha, putative	10.3614	0.28
AT1G62750	Q9SI75	SCO1 (SNOWY COTYLEDON 1); ATP binding / translation elongation factor/ translation factor, nucleic acid binding	23.5643	0.03
AT1G63680	Q9CAD3	MURE; ATP binding / acid-amino acid ligase/ ligase	3.2	0.01
AT1G64740	P11139	TUA1 (ALPHA-1 TUBULIN); structural constituent of cytoskeleton	73.4841	0.37
AT1G65220	Q93ZY6	eIF4-gamma/eIF5/eIF2-epsilon domain-containing protein	14.4314	0.06
AT1G65280	Q0WVU7	heat shock protein binding	5.79957	0.24
AT1G65350	Q7GAQ5	UBQ13; protein binding	11.3518	0.59
AT1G65820	Q94BY2	microsomal glutathione s-transferase, putative
AT1G66200	Q8LCE1	ATGSR2; copper ion binding / glutamate-ammonia ligase	19.3226	0.19
AT1G66270	Q9C525	BGLU21; catalytic/ cation binding / hydrolase, hydrolyzing O-glycosyl compounds	443.737	0.28
AT1G66280	Q9C8Y9	BGLU22; catalytic/ cation binding / hydrolase, hydrolyzing O-glycosyl compounds	27.243	0.32
AT1G66580	Q93W22	60S ribosomal protein L10 (RPL10C)	18.7625	0.53
AT1G67090	P10795	RBCS1A (RIBULOSE BISPHOSPHATE CARBOXYLASE SMALL CHAIN 1A); copper ion binding / ribulose-bisphosphate carboxylase	100.203	0.39
AT1G67430	P51413	60S ribosomal protein L17 (RPL17B)	46.0612	0.48
AT1G67730	Q8L9C4	YBR159; ketoreductase/ oxidoreductase	76.7839	0.12
AT1G68680	Q8L9R6	unknown protein
AT1G69730	Q9C9L5	protein kinase family protein
AT1G70070	B9DFG3	EMB25 (EMBRYO DEFECTIVE 25); ATP-dependent helicase/ RNA helicase	1.23311	0.01
AT1G70320	Q8H0T4	UPL2 (UBIQUITIN-PROTEIN LIGASE 2); ubiquitin-protein ligase	10.8582	0.03
AT1G70620	Q9CAB4	cyclin-related	9.45877	0.36
AT1G71500	Q9C9I7	Rieske (2Fe-2S) domain-containing protein	215.042	0.02
AT1G72150	Q56WK6	PATL1 (PATELLIN 1); transporter	20.9014	0.07
AT1G72370	Q08682	P40; structural constituent of ribosome	41.7857	0.53
AT1G72730	Q9CAI7	eukaryotic translation initiation factor 4A, putative / eIF-4A, putative	114.686	0.73
AT1G74050	Q9C9C5	60S ribosomal protein L6 (RPL6C)	13.9689	0.55
AT1G74060	Q9C9C6	60S ribosomal protein L6 (RPL6B)	13.9689	0.55
AT1G74270	Q9C912	60S ribosomal protein L35a (RPL35aC)	32.9007	0.16
AT1G74470	Q9CA67	geranylgeranyl reductase	25.603	0.09
AT1G74730	Q94F10	unknown protein
AT1G76010	Q93VA8	nucleic acid binding	14.185	0.31
AT1G76030	P11574	vacuolar ATP synthase subunit B / V-ATPase B subunit / vacuolar proton pump B subunit / V-ATPase 57 kDa subunit	327.157	0.33
AT1G76180	P42763	ERD14 (EARLY RESPONSE TO DEHYDRATION 14); calcium ion binding	7.42797	0.38
AT1G78300	Q01525	GRF2 (GENERAL REGULATORY FACTOR 2); protein binding / protein phosphorylated amino acid binding	88.2088	0.41
AT1G78900	O23654	VHA-A (VACUOLAR ATP SYNTHASE SUBUNIT A); ATP binding / hydrogen ion transporting ATP synthase, rotational mechanism / hydrolase, acting on acid anhydrides, catalyzing transmembrane movement of substances / proton-transporting ATPase, rotational mechanism	28.9727	0.32
AT1G79040	P27202	PSBR (photosystem II subunit R)	8.43121	0.03
AT1G79200	Q8GWY0	unknown protein	12.6209	0.48
AT1G79850	P16180	RPS17 (RIBOSOMAL PROTEIN S17); structural constituent of ribosome	145.38	0.33
AT1G79920	Q3EC99	ATP binding	117.38	0.3
AT1G79930	Q2V4B7	HSP91; ATP binding	432.761	0.35
AT1G80030	Q0WN54	DNAJ heat shock protein, putative
AT1G80070	Q9SSD2	SUS2 (ABNORMAL SUSPENSOR 2)	4.24866	0.22
AT1G80480	Q9M8L6	PTAC17 (PLASTID TRANSCRIPTIONALLY ACTIVE17)	3.57111	0.01
AT1G80660	Q42556	AHA9; hydrogen-exporting ATPase, phosphorylative mechanism	64.9276	0.17
AT2G01140	Q9ZU52	fructose-bisphosphate aldolase, putative	885.712	0.18
AT2G01250	P60040	60S ribosomal protein L7 (RPL7B)	18.9855	0.63
AT2G02150	P0C894	pentatricopeptide (PPR) repeat-containing protein
AT2G04390	P49205	40S ribosomal protein S17 (RPS17A)	36.3895	0.48
AT2G04842	Q56XW1	EMB2761 (EMBRYO DEFECTIVE 2761); ATP binding / aminoacyl-tRNA ligase/ ligase, forming aminoacyl-tRNA and related compounds / nucleotide binding / threonine-tRNA ligase	4.44136	0.02
AT2G05070	Q9S7J7	LHCB2.2; chlorophyll binding	631.257	0.46
AT2G05100	Q9SHR7	LHCB2.1; chlorophyll binding	631.257	0.46
AT2G05220	Q9SJ36	40S ribosomal protein S17 (RPS17B)	36.3895	0.48
AT2G07560	Q9SH76	AHA6 (Arabidopsis H(+)-ATPase 6); ATPase	61.2457	0.26
AT2G09990	Q9SK22	40S ribosomal protein S16 (RPS16A)	13.7241	0.45
AT2G13360	Q56YA5	AGT (ALANINE:GLYOXYLATE AMINOTRANSFERASE); alanine-glyoxylate transaminase/ serine-glyoxylate transaminase/ serine-pyruvate transaminase	4.17367	0.04
AT2G14080	Q8S8G3	disease resistance protein (TIR-NBS-LRR class), putative
AT2G17360	Q93VH9	40S ribosomal protein S4 (RPS4A)	25.6842	0.65
AT2G18020	P46286	EMB2296 (embryo defective 2296); structural constituent of ribosome	8.23395	0.53
AT2G18960	P20649	AHA1 (ARABIDOPSIS H+ ATPASE 1); ATPase/ hydrogen-exporting ATPase, phosphorylative mechanism / protein binding	32.2112	0.33
AT2G19730	O82204	60S ribosomal protein L28 (RPL28A)	5.48783	0.32
AT2G20140	Q9SL67	26S protease regulatory complex subunit 4, putative	18.6623	0.18
AT2G20450	Q9SIM4	60S ribosomal protein L14 (RPL14A)	5.71604	0.52
AT2G20580	Q9SIV2	RPN1A (26S PROTEASOME REGULATORY SUBUNIT S2 1A); binding / enzyme regulator	46.4822	0.26
AT2G21330	Q9SJU4	fructose-bisphosphate aldolase, putative	1401.53	0.23
AT2G21390	Q9SJT9	coatomer protein complex, subunit alpha, putative	128.316	0.29
AT2G21660	Q03250	CCR2 (COLD, CIRCADIAN RHYTHM, AND RNA BINDING 2); RNA binding / double-stranded DNA binding / single-stranded DNA binding	18.1861	0.66
AT2G22360	Q9SJZ7	DNAJ heat shock family protein	83.0786	0.02
AT2G22690	Q9ZQ45	protein binding / zinc ion binding
AT2G22930	O81010	glycosyltransferase family protein
AT2G24520	Q9SJB3	AHA5 (Arabidopsis H(+)-ATPase 5); ATPase	55.1474	0.16
AT2G24700	Q9SHV3	transcriptional factor B3 family protein	6.48119	0.02
AT2G25140	Q8VYJ7	CLPB4 (CASEIN LYTIC PROTEINASE B4); ATP binding / ATPase/ nucleoside-triphosphatase/ nucleotide binding / protein binding	16.122	0.15
AT2G26140	O80983	ftsh4 (FtsH protease 4); ATP-dependent peptidase/ ATPase/ metallopeptidase	33.9355	0.03
AT2G27710	Q9SLF7	60S acidic ribosomal protein P2 (RPP2B)	14.5835	0.35
AT2G27720	P51407	60S acidic ribosomal protein P2 (RPP2A)	43.7374	0.26
AT2G28000	P21238	CPN60A (CHAPERONIN-60ALPHA); ATP binding / protein binding	1031.27	0.32
AT2G28360	Q9SKN4
AT2G28620	Q9SIB3	kinesin motor protein-related
AT2G28720	Q9SI96	histone H2B, putative	18.9563	0.57
AT2G29140	Q9ZW02	APUM3 (Arabidopsis Pumilio 3); RNA binding / binding	6.62499	0.04
AT2G29190	Q9ZW06	APUM2 (Arabidopsis Pumilio 2); RNA binding / binding	6.62499	0.04
AT2G29200	Q9ZW07	APUM1 (Arabidopsis Pumilio 1); RNA binding / binding	6.62499	0.04
AT2G29550	P29515	TUB7; structural constituent of cytoskeleton	702.491	0.46
AT2G31610	Q9SIP7	40S ribosomal protein S3 (RPS3A)	39.3079	0.62
AT2G31900	Q9SKB0	XIF; motor	120.527	0.05
AT2G32220	Q9SKX8	60S ribosomal protein L27 (RPL27A)	6.41364	0.34
AT2G33210	Q8L7B5	HSP60-2 (HEAT SHOCK PROTEIN 60-2); ATP binding	2985.36	0.3
AT2G33800	P93014	ribosomal protein S5 family protein	24.1415	0.31
AT2G34160	O22969	nucleic acid binding	56.2742	0.2
AT2G34420	Q39141	LHB1B2; chlorophyll binding	48.6985	0.52
AT2G34430	Q39142	LHB1B1; chlorophyll binding	50.4652	0.51
AT2G34480	P51418	60S ribosomal protein L18A (RPL18aB)	17.1115	0.49
AT2G34590	O64688	transketolase family protein	16.6239	0.08
AT2G35510	O82289	SRO1 (SIMILAR TO RCD ONE 1); NAD+ ADP-ribosyltransferase	151.32	0.01
AT2G35840	Q9SJ66	sucrose-phosphatase 1 (SPP1)
AT2G36160	Q9SIH0	40S ribosomal protein S14 (RPS14A)	23.2684	0.65
AT2G36170	B9DHA6	ubiquitin extension protein 2 (UBQ2) / 60S ribosomal protein L40 (RPL40A)	11.3518	0.59
AT2G36200	P82266	kinesin motor protein-related
AT2G36460	Q9SJQ9	fructose-bisphosphate aldolase, putative	18.3294	0.38
AT2G36580	Q9SJQ0	pyruvate kinase, putative	6.31188	0.05
AT2G36880	Q9SJL8	MAT3 (methionine adenosyltransferase 3); copper ion binding / methionine adenosyltransferase	815.114	0.42
AT2G37170	P43287	PIP2B (PLASMA MEMBRANE INTRINSIC PROTEIN 2); water channel	48.3845	0.15
AT2G37190	P50883	60S ribosomal protein L12 (RPL12A)	17.2304	0.34
AT2G37270	Q9ZUT9	ATRPS5B (RIBOSOMAL PROTEIN 5B); structural constituent of ribosome	14.4185	0.56
AT2G37420	Q0WQJ7	kinesin motor protein-related
AT2G37470	Q9ZUS0	histone H2B, putative	18.9562	0.58
AT2G37620	P10671	ACT1 (ACTIN 1); structural constituent of cytoskeleton	20.6556	0.35
AT2G38040	Q9LD43	CAC3; acetyl-CoA carboxylase	76.7369	0.2
AT2G38610	Q9ZVI3	KH domain-containing protein	3969.9	0.01
AT2G38750	Q9ZVJ6	ANNAT4 (ANNEXIN ARABIDOPSIS 4); calcium ion binding / calcium-dependent phospholipid binding	215.179	0.23
AT2G39010	Q9ZV07	PIP2E (PLASMA MEMBRANE INTRINSIC PROTEIN 2E); water channel	2.35228	0.01
AT2G39590	O80646	40S ribosomal protein S15A (RPS15aC)	16.8502	0.47
AT2G39730	P10896	RCA (RUBISCO ACTIVASE); ADP binding / ATP binding / enzyme regulator/ ribulose-1,5-bisphosphate carboxylase/oxygenase activator	28.6947	0.45
AT2G39800	P54887	P5CS1 (DELTA1-PYRROLINE-5-CARBOXYLATE SYNTHASE 1); delta1-pyrroline-5-carboxylate synthetase	5189.14	0.08
AT2G40510	Q8LPJ7	40S ribosomal protein S26 (RPS26A)	20.1735	0.45
AT2G40590	P49206	40S ribosomal protein S26 (RPS26B)	19.6894	0.45
AT2G41475	Q681K2		11.6883	0.4
AT2G41840	P49688	40S ribosomal protein S2 (RPS2C)	34.0449	0.59
AT2G42100	Q8RYC2	actin, putative	39.3937	0.27
AT2G42520	Q84W89	DEAD box RNA helicase, putative	38.6226	0.37
AT2G42590	Q96299	GRF9 (GENERAL REGULATORY FACTOR 9); calcium ion binding / protein binding / protein phosphorylated amino acid binding	52.3839	0.39
AT2G42740	P42795	RPL16A; structural constituent of ribosome	11.8812	0.64
AT2G43030	Q9SKX4	ribosomal protein L3 family protein	956.634	0.35
AT2G44120	P60039	60S ribosomal protein L7 (RPL7C)	12.7817	0.56
AT2G44590	Q8S3C9	ADL1D (ARABIDOPSIS DYNAMIN-RELATED PROTEIN 1D); GTP binding / GTPase	11.1398	0.18
AT2G45290	O22143	transketolase, putative	10.74	0.2
AT2G45710	O64650	40S ribosomal protein S27 (RPS27A)	13.5906	0.18
AT2G45960	Q06611	PIP1B (NAMED PLASMA MEMBRANE INTRINSIC PROTEIN 1B); water channel	214.842	0.44
AT2G47110	P59232	UBQ6; protein binding	10.8907	0.6
AT2G47170	P36397	ARF1A1C; GTP binding / phospholipase activator/ protein binding	45.9443	0.48
AT2G47400	O22914	CP12-1	10.4367	0.08
AT3G01500	P27140	CA1 (CARBONIC ANHYDRASE 1); carbonate dehydratase/ zinc ion binding	17.6893	0.22
AT3G01540	Q8H136	DRH1 (DEAD BOX RNA HELICASE 1); ATP-dependent RNA helicase/ ATPase	31.1479	0.19
AT3G02450	Q8LBL6	cell division protein ftsH, putative	96.1265	0.01
AT3G02520	Q96300	GRF7 (GENERAL REGULATORY FACTOR 7); protein binding / protein phosphorylated amino acid binding	42.1621	0.41
AT3G02560	Q9M885	40S ribosomal protein S7 (RPS7B)	201.116	0.39
AT3G03780	Q9SRV5	AtMS2; 5-methyltetrahydropteroyltriglutamate-homocysteine S-methyltransferase/ methionine synthase	11.7007	0.52
AT3G03920	Q8VZT0	Gar1 RNA-binding region family protein	5.85161	0.37
AT3G03940	Q9SQR8	protein kinase family protein	38.4523	0.06
AT3G04120	P25858	GAPC1 (GLYCERALDEHYDE-3-PHOSPHATE DEHYDROGENASE C SUBUNIT 1); glyceraldehyde-3-phosphate dehydrogenase (phosphorylating)/ glyceraldehyde-3-phosphate dehydrogenase	665.584	0.66
AT3G04210	Q8H1N6	disease resistance protein (TIR-NBS class), putative
AT3G04230	Q9M8X9	40S ribosomal protein S16 (RPS16B)	23.0652	0.57
AT3G04620	Q9SR12	nucleic acid binding	59.1038	0.17
AT3G04770	Q8H173	RPSAb (40S ribosomal protein SA B); structural constituent of ribosome	40.413	0.4
AT3G04840	Q9CAV0	40S ribosomal protein S3A (RPS3aA)	4.87651	0.63
AT3G05060	Q9MAB3	SAR DNA-binding protein, putative	3.17379	0.42
AT3G05560	Q9M9W1	60S ribosomal protein L22-2 (RPL22B)	6.04803	0.44
AT3G05590	P42791	RPL18 (RIBOSOMAL PROTEIN L18); structural constituent of ribosome	10.8695	0.6
AT3G06350	Q9SQT8	MEE32 (MATERNAL EFFECT EMBRYO ARREST 32); 3-dehydroquinate dehydratase/ NADP or NADPH binding / binding / catalytic/ shikimate 5-dehydrogenase
AT3G06480	Q9SQV1	DEAD box RNA helicase, putative	16.3252	0.16
AT3G06650	Q9C522	ACLB-1; ATP citrate synthase	13.9134	0.13
AT3G06720	Q96321	IMPA-1 (IMPORTIN ALPHA ISOFORM 1); binding / protein transporter	26.6713	0.38
AT3G06730	Q9M7X9	thioredoxin family protein	3.985	0.02
AT3G08530	Q0WLB5	clathrin heavy chain, putative	195.098	0.43
AT3G08620	Q8GYR4	KH domain-containing protein	626.9	0.01
AT3G09260	Q9SR37	PYK10; beta-glucosidase/ copper ion binding / fucosidase/ hydrolase, hydrolyzing O-glycosyl compounds	1049.63	0.34
AT3G09440	O65719	heat shock cognate 70 kDa protein 3 (HSC70-3) (HSP70-3)	96.3806	0.6
AT3G09620	Q9SF41	DEAD/DEAH box helicase, putative	1.39388	0.34
AT3G09680	Q9SF35	40S ribosomal protein S23 (RPS23A)	9.36089	0.53
AT3G09790	Q39256	UBQ8; protein binding	11.3518	0.59
AT3G10360	Q9SS47	APUM4 (Arabidopsis Pumilio 4); RNA binding / binding	8.4659	0.03
AT3G10610	Q9SQZ1	40S ribosomal protein S17 (RPS17C)	36.3895	0.48
AT3G11130	Q0WNJ6	clathrin heavy chain, putative	157.79	0.43
AT3G11510	Q9CAX6	40S ribosomal protein S14 (RPS14B)	22.8574	0.66
AT3G11630	Q96291	2-cys peroxiredoxin, chloroplast (BAS1)	47.0386	0.14
AT3G11890	Q9FDY0
AT3G11940	P51427	ATRPS5A (RIBOSOMAL PROTEIN 5A); structural constituent of ribosome	33.4505	0.56
AT3G12110	P53496	ACT11 (actin-11); structural constituent of cytoskeleton	18.2027	0.42
AT3G12580	Q9LHA8	HSP70 (heat shock protein 70); ATP binding	27.7343	0.38
AT3G12780	Q9LD57	PGK1 (PHOSPHOGLYCERATE KINASE 1); phosphoglycerate kinase	9.12359	0.3
AT3G12980	Q9LE42	HAC5; H3/H4 histone acetyltransferase/ histone acetyltransferase	2.27353	0.01
AT3G13460	Q2V3W2	ECT2; protein binding	40.9853	0.28
AT3G13470	Q9LJE4	chaperonin, putative	8.61109	0.42
AT3G13580	Q9LHP1	60S ribosomal protein L7 (RPL7D)	14.2929	0.57
AT3G13860	Q93ZM7	HSP60-3A (HEAT SHOCK PROTEIN 60-3A); ATP binding / protein binding	154.694	0.12
AT3G13920	P41376	EIF4A1 (EUKARYOTIC TRANSLATION INITIATION FACTOR 4A1); ATP-dependent helicase/ translation initiation factor	119.5	0.7
AT3G14415	Q9LRS0	(S)-2-hydroxy-acid oxidase, peroxisomal, putative / glycolate oxidase, putative / short chain alpha-hydroxy acid oxidase, putative	33.0591	0.17
AT3G14600	Q9LUD4	60S ribosomal protein L18A (RPL18aC)	21.1281	0.39
AT3G15356	Q9LJR2	legume lectin family protein	4.70351	0.31
AT3G15730	Q38882	PLDALPHA1 (PHOSPHOLIPASE D ALPHA 1); phospholipase D	101.887	0.44
AT3G15980	Q8L828	coatomer protein complex, subunit beta 2 (beta prime), putative	25.8776	0.14
AT3G16530	Q9LK72	legume lectin family protein	4.99053	0.2
AT3G16950	A8MS68	LPD1 (LIPOAMIDE DEHYDROGENASE 1); dihydrolipoyl dehydrogenase	11.1319	0.02
AT3G17390	Q9LUT2	MTO3 (METHIONINE OVER-ACCUMULATOR 3); methionine adenosyltransferase	44.3589	0.45
AT3G18780	Q96292	ACT2 (ACTIN 2); structural constituent of cytoskeleton	31.9901	0.52
AT3G19760	Q94A52	eukaryotic translation initiation factor 4A, putative / eIF-4A, putative / DEAD box RNA helicase, putative	155.314	0.51
AT3G20820	Q9LT39	leucine-rich repeat family protein	10.07	0.1
AT3G21090	Q8RWI9	ABC transporter family protein
AT3G22230	Q8LCL3	60S ribosomal protein L27 (RPL27B)	6.29405	0.35
AT3G22250	Q9LHJ2	UDP-glucoronosyl/UDP-glucosyl transferase family protein
AT3G22890	Q9LIK9	APS1 (ATP SULFURYLASE 1); sulfate adenylyltransferase (ATP)	15.4045	0.03
AT3G23900	Q9LIR7	RNA recognition motif (RRM)-containing protein	94.7925	0.28
AT3G23990	P29197	HSP60 (HEAT SHOCK PROTEIN 60); ATP binding	2183.72	0.38
AT3G25520	Q8LBI1	ATL5 (A. THALIANA RIBOSOMAL PROTEIN L5); 5S rRNA binding / structural constituent of ribosome	27.1958	0.48
AT3G25800	Q38950	PP2AA2 (PROTEIN PHOSPHATASE 2A SUBUNIT A2); protein phosphatase type 2A regulator	3.29595	0.03
AT3G25860	Q9SQI8	LTA2; dihydrolipoyllysine-residue acetyltransferase	38.8533	0.15
AT3G26650	P25856	GAPA (GLYCERALDEHYDE 3-PHOSPHATE DEHYDROGENASE A SUBUNIT); glyceraldehyde-3-phosphate dehydrogenase/ protein binding	19.9689	0.38
AT3G27170	P92942	CLC-B (CHLORIDE CHANNEL B); anion channel/ voltage-gated chloride channel	6.31062	0.02
AT3G27690	Q9XF87	LHCB2.3; chlorophyll binding	605.505	0.48
AT3G27830	P36210	RPL12-A (RIBOSOMAL PROTEIN L12-A); structural constituent of ribosome	27.7546	0.23
AT3G27850	P36212	RPL12-C (ribosomal protein l12-c); structural constituent of ribosome	27.7546	0.23
AT3G29075	Q9LJV8	glycine-rich protein	3.67372	0.37
AT3G42060	Q9LX64	myosin heavy chain-related
AT3G42640	Q9M2A0	AHA8 (Arabidopsis H(+)-ATPase 8); ATPase	64.4772	0.26
AT3G44110	Q94AW8	ATJ3; protein binding	8.75813	0.1
AT3G44480	Q9LXN9	RPP1 (recognition of peronospora parasitica 1); LRR domain binding
AT3G44540	Q9LXN3	FAR4 (FATTY ACID REDUCTASE 4); binding / catalytic/ oxidoreductase, acting on the CH-CH group of donors
AT3G44670	Q9M1N7	ATP binding / nucleoside-triphosphatase/ nucleotide binding / protein binding / transmembrane receptor
AT3G45140	P38418	LOX2 (LIPOXYGENASE 2); lipoxygenase	28.8063	0.15
AT3G45980	O23629	HTB9; DNA binding	20.8667	0.63
AT3G46030	Q9LZT0	HTB11; DNA binding	20.8057	0.63
AT3G46040	Q9LX88	RPS15AD (ribosomal protein S15A D); structural constituent of ribosome	36.2823	0.63
AT3G46520	P53497	ACT12 (ACTIN-12); structural constituent of cytoskeleton	29.1951	0.5
AT3G46780	Q9STF2	PTAC16 (PLASTID TRANSCRIPTIONALLY ACTIVE 16); binding / catalytic	38.6023	0.06
AT3G47370	Q9STY6	40S ribosomal protein S20 (RPS20B)	10.881	0.5
AT3G47470	P27521	LHCA4 (LIGHT-HARVESTING CHLOROPHYLL-PROTEIN COMPLEX I SUBUNIT A4); chlorophyll binding	69.6223	0.41
AT3G47520	Q9SN86	MDH (MALATE DEHYDROGENASE); L-malate dehydrogenase/ binding / catalytic/ malate dehydrogenase/ oxidoreductase/ oxidoreductase, acting on the CH-OH group of donors, NAD or NADP as acceptor	25.7879	0.21
AT3G47950	Q9SU58	AHA4; ATPase/ hydrogen-exporting ATPase, phosphorylative mechanism	72.142	0.21
AT3G48870	Q9SXJ7	HSP93-III; ATP binding / ATPase/ DNA binding / nuclease/ nucleoside-triphosphatase/ nucleotide binding / protein binding	134.47	0.24
AT3G49430	A2RVS6	SRp34a (Ser/Arg-rich protein 34a); RNA binding / nucleic acid binding / nucleotide binding	5.35015	0.27
AT3G49830	Q9M2X5	DNA helicase-related	63.97	0.03
AT3G51190	Q4PSL7	structural constituent of ribosome	16.3751	0.35
AT3G51950	Q9SV09	zinc finger (CCCH-type) family protein / RNA recognition motif (RRM)-containing protein
AT3G52220	Q94JX8	unknown protein	573.624	0.44
AT3G52390	Q2V3P8	tatD-related deoxyribonuclease family protein
AT3G52580	P42036	40S ribosomal protein S14 (RPS14C)	25.4666	0.64
AT3G52590	Q42202	UBQ1 (UBIQUITIN EXTENSION PROTEIN 1); protein binding / structural constituent of ribosome	11.3518	0.59
AT3G52930	Q9LF98	fructose-bisphosphate aldolase, putative	24.9035	0.44
AT3G52990	Q94KE3	pyruvate kinase, putative	3.95646	0.04
AT3G53430	Q9LFH5	60S ribosomal protein L12 (RPL12B)	17.2304	0.34
AT3G53650	Q9LFF6	histone H2B, putative	18.9578	0.58
AT3G54090	Q9M394	pfkB-type carbohydrate kinase family protein
AT3G54820	Q9SV31	PIP2;5 (PLASMA MEMBRANE INTRINSIC PROTEIN 2;5); water channel	33.9727	0.17
AT3G54890	A8MS75	LHCA1; chlorophyll binding	43.1495	0.14
AT3G54900	Q84Y95	CXIP1 (CAX INTERACTING PROTEIN 1); antiporter/ glutathione disulfide oxidoreductase	4.85556	0.01
AT3G55360	Q9M2U2	CER10; 3-oxo-5-alpha-steroid 4-dehydrogenase/ fatty acid elongase/ trans-2-enoyl-CoA reductase (NADPH)	3.00599	0.04
AT3G55610	P54888	P5CS2 (DELTA 1-PYRROLINE-5-CARBOXYLATE SYNTHASE 2); catalytic/ glutamate 5-kinase/ glutamate-5-semialdehyde dehydrogenase/ oxidoreductase	5189.14	0.08
AT3G55750	P51422	60S ribosomal protein L35a (RPL35aD)	32.9007	0.16
AT3G56340	Q9LYK9	40S ribosomal protein S26 (RPS26C)	21.4236	0.43
AT3G57150	Q9LD90	NAP57 (Arabidopsis thaliana homologue of NAP57); pseudouridine synthase	2.39451	0.46
AT3G57490	Q9SCM3	40S ribosomal protein S2 (RPS2D)	38.3324	0.54
AT3G58140	Q94K73	phenylalanyl-tRNA synthetase class IIc family protein
AT3G58160	Q9M2K0	XIJ; motor	45.2645	0.06
AT3G58510	Q8LA13	DEAD box RNA helicase, putative (RH11)	43.909	0.39
AT3G58570	Q9M2F9	DEAD box RNA helicase, putative	38.7055	0.34
AT3G59800	Q9M1Z4	unknown protein	64.6681	0.2
AT3G60330	Q9LY32	AHA7 (Arabidopsis H(+)-ATPase 7); hydrogen-exporting ATPase, phosphorylative mechanism	93.1894	0.15
AT3G60600	Q2V3M6	VAP (VESICLE ASSOCIATED PROTEIN); protein binding	18.4559	0.03
AT3G60750	Q8RWV0	transketolase, putative	10.0197	0.31
AT3G61110	Q9M2F1	ARS27A (ARABIDOPSIS RIBOSOMAL PROTEIN S27); structural constituent of ribosome	13.5906	0.18
AT3G61430	P61837	PIP1A (PLASMA MEMBRANE INTRINSIC PROTEIN 1A); water channel	38.2767	0.34
AT3G61700	A8MQR1	unknown protein
AT3G61760	Q84XF3	ADL1B (ARABIDOPSIS DYNAMIN-LIKE 1B); GTP binding / GTPase	16.1768	0.07
AT3G62030	P34791	peptidyl-prolyl cis-trans isomerase, chloroplast / cyclophilin / rotamase / cyclosporin A-binding protein (ROC4)	8217.22	0.09
AT3G62250	P59233	UBQ5 (ubiquitin 5); protein binding / structural constituent of ribosome	48.5896	0.56
AT3G62290	Q9M1P5	ATARFA1E (ADP-ribosylation factor A1E); GTP binding / phospholipase activator/ protein binding	45.9443	0.48
AT3G62530	Q94K48	PBS lyase HEAT-like repeat-containing protein	4.46164	0.03
AT3G63160	Q9M1X3	unknown protein	13.4807	0.09
AT3G63400	Q9LY75	peptidyl-prolyl cis-trans isomerase cyclophilin-type family protein	20.8762	0.12
AT3G63410	Q9LY74	APG1 (ALBINO OR PALE GREEN MUTANT 1); 2-methyl-6-phytyl-1,4-benzoquinone methyltransferase/ S-adenosylmethionine-dependent methyltransferase/ methyltransferase	7.04265	0.06
AT3G63490	Q9LY66	ribosomal protein L1 family protein	13.2165	0.14
AT4G00090	Q93ZN5	transducin family protein / WD-40 repeat family protein
AT4G00430	Q39196	PIP1;4 (PLASMA MEMBRANE INTRINSIC PROTEIN 1;4); water channel	42.1759	0.38
AT4G00650	Q9FDW0	FRI (FRIGIDA); protein heterodimerization/ protein homodimerization
AT4G01310	O04603	ribosomal protein L5 family protein	44.2732	0.19
AT4G01370	Q39024	ATMPK4 (ARABIDOPSIS THALIANA MAP KINASE 4); MAP kinase/ kinase	14	0.01
AT4G01850	P17562	SAM-2 (S-ADENOSYLMETHIONINE SYNTHETASE 2); copper ion binding / methionine adenosyltransferase	51.5677	0.28
AT4G02510	O81283	TOC159 (TRANSLOCON AT THE OUTER ENVELOPE MEMBRANE OF CHLOROPLASTS 159); transmembrane receptor	6429.6	0.05
AT4G02890	Q3E7T8	UBQ14; protein binding	11.3518	0.59
AT4G02930	Q9ZT91	elongation factor Tu, putative / EF-Tu, putative	21.5017	0.42
AT4G03280	Q9ZR03	PETC (PHOTOSYNTHETIC ELECTRON TRANSFER C); electron transporter, transferring electrons from cytochrome b6/f complex of photosystem II	710.544	0.07
AT4G04640	Q01908	ATPC1; enzyme regulator	9.81109	0.22
AT4G05050	P0CH33	UBQ11 (UBIQUITIN 11); protein binding	12.0411	0.49
AT4G05320	Q8H159	UBQ10 (POLYUBIQUITIN 10); protein binding	11.3518	0.59
AT4G09000	P42643	14-3-3-like protein GF14 chi / general regulatory factor 1 (GRF1)	70.3998	0.52
AT4G09650	Q9SSS9	ATPD (ATP SYNTHASE DELTA-SUBUNIT GENE); hydrogen ion transporting ATP synthase, rotational mechanism / proton-transporting ATPase, rotational mechanism	23.5514	0.13
AT4G10340	Q9XF89	LHCB5 (LIGHT HARVESTING COMPLEX OF PHOTOSYSTEM II 5); chlorophyll binding	62.0365	0.45
AT4G10450	Q9SZX9	60S ribosomal protein L9 (RPL90D)	40.6066	0.54
AT4G10500	Q9ZSA8	oxidoreductase, 2OG-Fe(II) oxygenase family protein
AT4G13770	P48421	CYP83A1 (CYTOCHROME P450 83A1); oxidoreductase, acting on paired donors, with incorporation or reduction of molecular oxygen, NADH or NADPH as one donor, and incorporation of one atom of oxygen / oxygen binding
AT4G14960	P29511	TUA6; structural constituent of cytoskeleton	50.3698	0.61
AT4G15000	P51419	60S ribosomal protein L27 (RPL27C)	14.5826	0.46
AT4G15802	Q8GW48		6.92394	0.09
AT4G16143	Q9ASV4	IMPA-2 (IMPORTIN ALPHA ISOFORM 2); binding / protein transporter	6.81389	0.37
AT4G16155	Q9M5K4	dihydrolipoyl dehydrogenase	9.64453	0.03
AT4G16990	Q9FT77	RLM3 (RESISTANCE TO LEPTOSPHAERIA MACULANS 3); ATP binding / transmembrane receptor
AT4G17560	Q8W463	ribosomal protein L19 family protein	5.65609	0.07
AT4G18240	Q0WVX5	ATSS4; transferase, transferring glycosyl groups	7.18911	0.03
AT4G18480	P16127	CHLI1; ATPase/ magnesium chelatase	1818.4	0.07
AT4G19570	Q84TH2	DNAJ heat shock N-terminal domain-containing protein
AT4G21150	Q93Z16	HAP6 (HAPLESS 6); dolichyl-diphosphooligosaccharide-protein glycotransferase	13.5954	0.1
AT4G22890	Q8H112	PGR5-LIKE A
AT4G23400	Q8LAA6	PIP1;5 (PLASMA MEMBRANE INTRINSIC PROTEIN 1;5); water channel	256.013	0.14
AT4G23670	Q9SUR0	major latex protein-related / MLP-related	8605.31	0.11
AT4G24280	Q9STW6	cpHsc70-1 (chloroplast heat shock protein 70-1); ATP binding	14.8636	0.36
AT4G25630	Q94AH9	FIB2 (FIBRILLARIN 2); snoRNA binding	22.4568	0.55
AT4G26450	P0CB21	unknown protein
AT4G26480	Q0WLR1	KH domain-containing protein	439.9	0.01
AT4G27090	Q9T043	60S ribosomal protein L14 (RPL14B)	5.20358	0.61
AT4G27440	P21218	PORB (PROTOCHLOROPHYLLIDE OXIDOREDUCTASE B); oxidoreductase/ protochlorophyllide reductase	7.12589	0.02
AT4G27500	O23144	PPI1 (PROTON PUMP INTERACTOR 1); protein binding	6.56165	0.14
AT4G27700	Q94A65	rhodanese-like domain-containing protein	3.73466	0.02
AT4G27780	Q9STP8	ACBP2 (ACYL-COA BINDING PROTEIN ACBP 2); acyl-CoA binding / lead ion binding
AT4G28470	Q6XJG8	RPN1B (26S PROTEASOME REGULATORY SUBUNIT S2 1B); binding / enzyme regulator	46.4822	0.26
AT4G28710	Q9SVT9	XIH; motor	45.237	0.06
AT4G29040	Q9SZD4	RPT2a (regulatory particle AAA-ATPase 2a); ATPase	18.6623	0.18
AT4G29410	Q9M0E2	60S ribosomal protein L28 (RPL28C)	6.99482	0.45
AT4G30010	Q9SZV4	unknown protein	9.51754	0.05
AT4G30190	P19456	AHA2; ATPase/ hydrogen-exporting ATPase, phosphorylative mechanism	45.0489	0.34
AT4G31480	Q9SV21	coatomer beta subunit, putative / beta-coat protein, putative / beta-COP, putative	26.3613	0.32
AT4G31490	Q9SV20	coatomer beta subunit, putative / beta-coat protein, putative / beta-COP, putative	26.3613	0.32
AT4G32260	Q42139	ATP synthase family	21.4649	0.1
AT4G32420	Q8RWY7	peptidyl-prolyl cis-trans isomerase cyclophilin-type family protein	7.90015	0.16
AT4G32540	Q9SZY8	YUC1 (YUCCA 1); FAD binding / NADP or NADPH binding / flavin-containing monooxygenase/ oxidoreductase
AT4G34670	Q42262	40S ribosomal protein S3A (RPS3aB)	14.4615	0.54
AT4G35090	P25819	CAT2 (CATALASE 2); catalase	322.923	0.33
AT4G35100	P93004	PIP3 (PLASMA MEMBRANE INTRINSIC PROTEIN 3); water channel	53.1976	0.09
AT4G35250	O65502	vestitone reductase-related	33.2054	0.03
AT4G36130	Q42064	60S ribosomal protein L8 (RPL8C)	9.00539	0.56
AT4G36690	O23212	ATU2AF65A; RNA binding / nucleic acid binding / nucleotide binding	8.97392	0.4
AT4G37930	Q9SZJ5	SHM1 (SERINE TRANSHYDROXYMETHYLTRANSFERASE 1); glycine hydroxymethyltransferase/ poly(U) binding	3939.81	0.09
AT4G38510	Q9SZN1	vacuolar ATP synthase subunit B, putative / V-ATPase B subunit, putative / vacuolar proton pump B subunit, putative / V-ATPase 57 kDa subunit, putative	334.992	0.32
AT4G38780	Q9T0I6	splicing factor, putative	4.05098	0.21
AT4G38970	Q944G9	fructose-bisphosphate aldolase, putative	11.3015	0.36
AT4G39960	Q940V1	DNAJ heat shock family protein	83.0786	0.02
AT5G01530	Q07473	chlorophyll A-B binding protein CP29 (LHCB4)	6.88354	0.24
AT5G02490	P22954	heat shock cognate 70 kDa protein 2 (HSC70-2) (HSP70-2)	1879.95	0.41
AT5G02500	P22953	HSC70-1 (HEAT SHOCK COGNATE PROTEIN 70-1); ATP binding	30.116	0.75
AT5G02570	Q9LZ45	histone H2B, putative	20.5482	0.6
AT5G02700	Q9LZ15	F-box family protein	1.58969	0.01
AT5G02960	P49201	40S ribosomal protein S23 (RPS23B)	9.36089	0.53
AT5G03100	Q501G5	F-box family protein	749.292	0.02
AT5G03240	Q1EC66	UBQ3 (POLYUBIQUITIN 3); protein binding	11.3518	0.59
AT5G03560	Q94F48	nucleobase:cation symporter
AT5G04800	Q9LZ17	40S ribosomal protein S17 (RPS17D)	36.3895	0.48
AT5G05010	Q93Y22	clathrin adaptor complexes medium subunit-related	13.5921	0.07
AT5G06290	Q9C5R8	2-Cys Prx B (2-Cysteine peroxiredoxin B); antioxidant/ peroxiredoxin	50.5211	0.13
AT5G07090	P49204	40S ribosomal protein S4 (RPS4B)	25.6842	0.65
AT5G07220	Q9LYP4	ATBAG3 (ARABIDOPSIS THALIANA BCL-2-ASSOCIATED ATHANOGENE 3); protein binding	39.6019	0.01
AT5G08650	Q8RWP3	GTP-binding protein LepA, putative	5.73724	0.02
AT5G08670	P83483	ATP binding / hydrogen ion transporting ATP synthase, rotational mechanism	9.56576	0.54
AT5G08680	Q9C5A9	ATP synthase beta chain, mitochondrial, putative	9.56576	0.54
AT5G08690	P83484	ATP synthase beta chain 2, mitochondrial	9.56576	0.54
AT5G09350	Q0WPX9	PI-4KBETA2 (PHOSPHATIDYLINOSITOL 4-OH KINASE BETA2); binding / inositol or phosphatidylinositol kinase/ phosphotransferase, alcohol group as acceptor
AT5G09500	Q9FY65	40S ribosomal protein S15 (RPS15C)	71.0837	0.55
AT5G09510	Q9FY64	40S ribosomal protein S15 (RPS15D)	74.0731	0.55
AT5G09810	P53492	ACT7 (ACTIN 7); structural constituent of cytoskeleton	16.3901	0.53
AT5G10240	Q9LFU1	ASN3 (ASPARAGINE SYNTHETASE 3); asparagine synthase (glutamine-hydrolyzing)	145.137	0.01
AT5G11420	Q9LYE7		6.76874	0.05
AT5G12230	Q9FMP0	unknown protein	4.3005	0.43
AT5G12250	P29514	TUB6 (BETA-6 TUBULIN); structural constituent of cytoskeleton	520.72	0.37
AT5G13430	Q94JS0	ubiquinol-cytochrome C reductase iron-sulfur subunit, mitochondrial, putative / Rieske iron-sulfur protein, putative	6.23718	0.04
AT5G13440	Q9LYR2	ubiquinol-cytochrome C reductase iron-sulfur subunit, mitochondrial, putative / Rieske iron-sulfur protein, putative	6.23718	0.04
AT5G13650	Q9FNA8	elongation factor family protein	2.73196	0.01
AT5G14610	Q9LYJ9	ATP binding / ATP-dependent helicase/ helicase/ nucleic acid binding / protein binding	34.3509	0.16
AT5G14670	Q9LYJ3	ATARFA1B (ADP-ribosylation factor A1B); GTP binding / phospholipase activator/ protein binding	45.9443	0.48
AT5G14740	P42737	CA2 (CARBONIC ANHYDRASE 2); carbonate dehydratase/ zinc ion binding	7.53066	0.16
AT5G15200	Q9LXG1	40S ribosomal protein S9 (RPS9B)	28.1003	0.7
AT5G16050	P42645	GRF5 (GENERAL REGULATORY FACTOR 5); ATP binding / protein binding / protein phosphorylated amino acid binding	38.0276	0.41
AT5G16780	Q9LFE0	DOT2 (DEFECTIVELY ORGANIZED TRIBUTARIES 2)	3.06753	0.4
AT5G17920	O50008	ATMS1; 5-methyltetrahydropteroyltriglutamate-homocysteine S-methyltransferase/ copper ion binding / methionine synthase	10.4716	0.66
AT5G18180	Q9FK53	Gar1 RNA-binding region family protein	17.6393	0.24
AT5G18190	Q9FK52	protein kinase family protein	38.1975	0.04
AT5G18380	Q42340	40S ribosomal protein S16 (RPS16C)	23.2939	0.58
AT5G19770	P20363	TUA3; structural constituent of cytoskeleton	73.047	0.38
AT5G19990	Q9C5U3	RPT6A (REGULATORY PARTICLE TRIPLE-A ATPASE 6A); ATPase	19.1371	0.2
AT5G20000	Q94BQ2	26S proteasome AAA-ATPase subunit, putative	19.1371	0.2
AT5G20470	Q3E995	myosin, putative	274.778	0.16
AT5G20490	Q3E994	XIK; motor/ protein binding	274.778	0.16
AT5G20620	P0CH32	UBQ4; protein binding	12.0411	0.49
AT5G20980	Q0WNZ5	ATMS3 (methionine synthase 3); 5-methyltetrahydropteroyltriglutamate-homocysteine S-methyltransferase/ methionine synthase	10.7567	0.56
AT5G22060	P42825	ATJ2; protein binding	24.928	0.11
AT5G22330	Q9FMR9	RIN1 (RESISTANCE TO PSEUDOMONAS SYRINGAE PV MACULICOLA INTERACTOR 1); protein binding	6.04	0.02
AT5G22450	Q9FMQ6	unknown protein
AT5G22530	Q9FK86	unknown protein
AT5G22880	Q9FFC0	HTB2; DNA binding	35.8173	0.6
AT5G23080	Q8GXN9	TGH (TOUGH); RNA binding / protein binding	17.4938	0.38
AT5G23120	O82660	HCF136; protein binding	24.0482	0.09
AT5G25370	P58766	PLDALPHA3 (PHOSPHLIPASE D ALPHA 3); phospholipase D	73.2367	0.17
AT5G25460	Q94F20	unknown protein	5.83602	0.06
AT5G26000	P37702	TGG1 (THIOGLUCOSIDE GLUCOHYDROLASE 1); hydrolase, hydrolyzing O-glycosyl compounds / thioglucosidase	3326.22	0.17
AT5G26742	Q8L7S8	emb1138 (embryo defective 1138); ATP binding / ATP-dependent helicase/ RNA binding / helicase/ nucleic acid binding / zinc ion binding	47.5801	0.26
AT5G26780	Q8GRI1	SHM2 (SERINE HYDROXYMETHYLTRANSFERASE 2); catalytic/ glycine hydroxymethyltransferase/ pyridoxal phosphate binding	14.9924	0.06
AT5G27770	Q9FE58	60S ribosomal protein L22 (RPL22C)	17.1243	0.37
AT5G27850	Q940B0	60S ribosomal protein L18 (RPL18C)	10.2723	0.58
AT5G28540	Q9LKR3	BIP1; ATP binding	15.7269	0.56
AT5G30510	Q93VC7	RPS1 (RIBOSOMAL PROTEIN S1); RNA binding / structural constituent of ribosome	18.3888	0.13
AT5G35530	Q9FJA6	40S ribosomal protein S3 (RPS3C)	39.8934	0.62
AT5G35630	Q43127	GS2 (GLUTAMINE SYNTHETASE 2); glutamate-ammonia ligase	15.5743	0.35
AT5G36230	Q93ZC2	eIF4-gamma/eIF5/eIF2-epsilon domain-containing protein	13.8148	0.07
AT5G37640	Q9FHQ6	UBQ9; protein binding	11.3518	0.59
AT5G38350	Q9FF28	disease resistance protein (NBS-LRR class), putative
AT5G38410	P10798	ribulose bisphosphate carboxylase small chain 3B / RuBisCO small subunit 3B (RBCS-3B) (ATS3B)	35.3459	0.41
AT5G38420	P10797	ribulose bisphosphate carboxylase small chain 2B / RuBisCO small subunit 2B (RBCS-2B) (ATS2B)	35.8568	0.39
AT5G38430	P10796	ribulose bisphosphate carboxylase small chain 1B / RuBisCO small subunit 1B (RBCS-1B) (ATS1B)	125.725	0.26
AT5G38480	P42644	GRF3 (GENERAL REGULATORY FACTOR 3); ATP binding / protein binding / protein phosphorylated amino acid binding	55.802	0.4
AT5G39740	P49227	60S ribosomal protein L5 (RPL5B)	28.8805	0.47
AT5G39850	Q9FLF0	40S ribosomal protein S9 (RPS9C)	28.6824	0.68
AT5G41790	Q9FJ35	CIP1 (COP1-INTERACTIVE PROTEIN 1); protein binding	9.50432	0.15
AT5G42020	Q39043	BIP2; ATP binding	21.4082	0.54
AT5G43010	Q9SEI3	RPT4A; ATPase	12.3387	0.17
AT5G43640	Q9FIX6	40S ribosomal protein S15 (RPS15E)	8.90159	0.44
AT5G43900	Q9LKB9	MYA2 (ARABIDOPSIS MYOSIN 2); GTP-dependent protein binding / Rab GTPase binding / motor	36.1966	0.09
AT5G44340	P24636	TUB4; structural constituent of cytoskeleton	291.699	0.53
AT5G45470	Q9FHI9	unknown protein
AT5G45620	Q3E8G4	26S proteasome regulatory subunit, putative (RPN9)	4.03828	0.04
AT5G45930	Q5XF33	CHLI2 (MAGNESIUM CHELATASE I2); ATPase/ magnesium chelatase	2110.9	0.06
AT5G46290	P52410	KAS I (3-KETOACYL-ACYL CARRIER PROTEIN SYNTHASE I); catalytic/ fatty-acid synthase/ transferase, transferring acyl groups other than amino-acyl groups	6.26675	0.04
AT5G46860	P93654	VAM3; SNAP receptor
AT5G47190	Q8RXX5	ribosomal protein L19 family protein	25.7344	0.08
AT5G48375	Q3E8E5	TGG3 (THIOGLUCOSIDE GLUCOSIDASE 3); hydrolase, hydrolyzing O-glycosyl compounds / thioglucosidase	1206.2	0.1
AT5G49460	Q9FGX1	ACLB-2 (ATP CITRATE LYASE SUBUNIT B 2); ATP citrate synthase	13.9134	0.13
AT5G49910	Q9LTX9	CPHSC70-2EAT SHOCK PROTEIN 70-2 (CHLOROPLAST HEAT SHOCK PROTEIN 70-2); ATP binding / unfolded protein binding	15.6578	0.32
AT5G50420	Q8L9A2	unknown protein
AT5G50920	Q9FI56	CLPC1; ATP binding / ATP-dependent peptidase/ ATPase	123.47	0.26
AT5G51070	P42762	ERD1 (EARLY RESPONSIVE TO DEHYDRATION 1); ATP binding / ATPase/ nucleoside-triphosphatase/ nucleotide binding / protein binding	4.44335	0.06
AT5G52470	Q9FEF8	FIB1 (FIBRILLARIN 1); snoRNA binding	7.0479	0.51
AT5G52640	P27323	ATHSP90.1 (HEAT SHOCK PROTEIN 90.1); ATP binding / unfolded protein binding	44.3713	0.55
AT5G53800	Q8LCP8	unknown protein	12.9983	0.45
AT5G54270	Q9S7M0	LHCB3 (LIGHT-HARVESTING CHLOROPHYLL B-BINDING PROTEIN 3); structural molecule	6.46596	0.08
AT5G56000	O03986	heat shock protein 81-4 (HSP81-4)	44.2332	0.54
AT5G56010	P51818	HSP81-3; ATP binding / unfolded protein binding	44.2332	0.54
AT5G56030	P55737	HSP81-2 (HEAT SHOCK PROTEIN 81-2); ATP binding	50.0653	0.59
AT5G56140	Q9FKT4	KH domain-containing protein	311.4	0.01
AT5G56500	C0Z361	ATP binding / protein binding	9.06435	0.43
AT5G57350	P20431	AHA3; ATPase/ hydrogen-exporting ATPase, phosphorylative mechanism	46.2064	0.23
AT5G58290	Q9SEI4	RPT3 (REGULATORY PARTICLE TRIPLE-A ATPASE 3); ATPase	37.7058	0.21
AT5G58420	Q8VYK6	40S ribosomal protein S4 (RPS4D)	27.9217	0.56
AT5G59370	P53494	ACT4 (ACTIN 4); structural constituent of cytoskeleton	29.1951	0.5
AT5G59910	P40283	HTB4; DNA binding	64.6997	0.61
AT5G60660	Q9FF53	PIP2;4 (PLASMA MEMBRANE INTRINSIC PROTEIN 2;4); water channel	35.6625	0.07
AT5G60670	Q9FF52	60S ribosomal protein L12 (RPL12C)	17.2304	0.34
AT5G60790	Q9FJH6	ATGCN1; transporter	37.9075	0.06
AT5G61020	Q93ZP1	ECT3	45.222	0.25
AT5G62200	Q9LVB6	embryo-specific protein-related	55.3882	0.14
AT5G62390	Q9LVA0	ATBAG7 (ARABIDOPSIS THALIANA BCL-2-ASSOCIATED ATHANOGENE 7); calmodulin binding	148.012	0.31
AT5G62690	P29512	TUB2; GTP binding / GTPase/ structural molecule	74.2594	0.66
AT5G63120	Q8W4R3	ethylene-responsive DEAD box RNA helicase, putative (RH30)	33.4003	0.21
AT5G64040	P49107	PSAN; calmodulin binding	8.77842	0.06
AT5G64200	Q9FMG4	ATSC35; RNA binding / nucleic acid binding / nucleotide binding	7.60895	0.36
AT5G64730	Q94AH2	transducin family protein / WD-40 repeat family protein	1.27663	0.03
AT5G65010	Q9LV77	ASN2 (ASPARAGINE SYNTHETASE 2); asparagine synthase (glutamine-hydrolyzing)	74.013	0.02
AT5G65430	P48348	GRF8 (GENERAL REGULATORY FACTOR 8); protein binding / protein phosphorylated amino acid binding	150.503	0.35
AT5G66420	Q9FJZ7
AT5G66470	Q8VZ74	GTP binding / RNA binding	3.18354	0.07
AT5G66680	Q944K2	DGL1; dolichyl-diphosphooligosaccharide-protein glycotransferase	4.36682	0.05
AT5G67030	Q9FGC7	ABA1 (ABA DEFICIENT 1); zeaxanthin epoxidase	2.57876	0.02
AT5G67630	Q9FJW0	DNA helicase, putative	63.97	0.03
