# Supplementary material for: Arabidopsis RCD1 coordinates chloroplast and mitochondrial functions through interaction with ANAC transcription factors
Source: eLife journal article supplement (doi:10.7554/elife.43284), 2019-02-15
Supplement: supp [file elife-43284-supp-v1.zip › elife_poa_e43284_Figure_7_source_data_2.xlsx]

## Sheet: Perseus analysis, RCD1
Peptides	Unique peptides	Sequence coverage [%]	Unique sequence coverage [%]	Mol. weight [kDa]	Q-value	Score	Intensity	MS/MS Count	LFQ intensity Col-0-rep1	LFQ intensity Col-0-rep2	LFQ intensity Col-0-rep3	Average Col-0	LFQ intensity RCD1-rep1	LFQ intensity RCD1-rep2	LFQ intensity RCD1-rep3	Average RCD1	RATIO RCD1 vs Col-0	p-value	Protein IDs	Majority protein IDs	Fasta headers	Peptide IDs
35	35	61.9	61.9	65.568	0	323.31	104150000	108	11	14.2456	11	12.0819	25.6054	25.4659	23.8462	24.9725	7593.95	0.000454372	AT1G32230.2;AT1G32230.3;AT1G32230.1	AT1G32230.2;AT1G32230.3;AT1G32230.1	Symbols: RCD1, CEO, CEO1, ATP8, AtRCD1 | WWE protein-protein interaction domain protein family | chr1:11613427-11615894 FORWARD LENGTH=588;Symbols: AtRCD1 | WWE protein-protein interaction domain protein family | chr1:11613427-11615748 FORWARD LENGTH=570	2;34;50;71;74;75;119;133;145;151;248;253;255;268;272;300;303;307;309;310;320;357;382;393;414;420;435;442;444;477;492;507;510;539;543
5	5	30.6	30.6	17.812	0	107.45	8113600	16	11	11	11	11	21.3636	21.593	21.3052	21.4206	1370.63	3.02526e-08	AT2G47110.2;AT2G47110.1;AT1G23410.1;AT3G62250.1;AT3G52590.1;AT2G36170.1;AT4G05050.4;AT2G35635.1;AT1G31340.1;AT4G05050.3;AT4G05050.2;AT4G05050.1;AT4G02890.2;AT4G02890.1;AT1G55060.1;AT4G05320.5;AT4G02890.4;AT4G02890.3;AT5G03240.3;AT5G03240.2;AT5G03240.1;AT1G65350.1;AT5G37640.1;AT4G05320.6;AT4G05320.3;AT4G05320.1;AT5G20620.1;AT4G05320.4;AT4G05320.2;AT3G09790.1;CON__P62979	AT2G47110.2;AT2G47110.1;AT1G23410.1;AT3G62250.1	Symbols: UBQ6 | ubiquitin 6 | chr2:19344701-19345174 FORWARD LENGTH=157;Symbols: UBQ6 | ubiquitin 6 | chr2:19344701-19345174 FORWARD LENGTH=157;Symbols: | Ribosomal protein S27a / Ubiquitin family protein | chr1:8314940-8315410 FORWARD LENGTH=156;Symb	51;115;266;267;462
10	10	38.7	38.7	36.974	0	94.566	23189000	59	17.0182	11	11	13.0061	23.2293	23.3667	23.4282	23.3414	1291.92	0.00674551	CON__PSB_N_GS_yellow|?leader-YFP-3C2-TEV2-SBP;CON__PSB_N_GS_green|eGFP-3C2-TEV2-eGFP;CON__PSB_C_GS_green|SBP-3C2-TEV2-eGFP;CON__PSB_C_GS_yellow|SBP-3C2-TEV2-citrineYFP;CON__P42212;CON__PSB_N_GFP|eGFP;CON__PSB_C_GFP|eGFP;CON__Q9U6Y5;CON__PSB_C_SBP-HA|G4S-SBP-HA;CON__PSB_C_SBP-Stag|G4S-SBP-Stag;CON__PSB_N_GS_TEV|ProtG2-TEV2-SBP;CON__PSB_N_GS_rhino|?leader-ProtG2-3C2-SBP;CON__PSB_C_GS_TEV|SBP-TEV2-P…	CON__PSB_N_GS_yellow|?leader-YFP-3C2-TEV2-SBP;CON__PSB_N_GS_green|eGFP-3C2-TEV2-eGFP;CON__PSB_C_GS_green|SBP-3C2-TEV2-eGFP;CON__PSB_C_GS_yellow|SBP-3C2-TEV2-citrineYFP;CON__P42212;CON__PSB_N_GFP|eGFP;CON__PSB_C_GFP|eGFP;CON__Q9U6Y5	GFP	11;43;126;146;154;162;172;395;453;461
9	8	26.4	24.3	58.906	0	89.966	3572500	31	11	11	11	11	20.2809	20.2361	20.4761	20.331	644.047	2.3294e-08	AT4G16143.2;AT4G16143.1;AT3G06720.2;AT3G06720.1;AT4G02150.1;AT1G02690.1;AT1G02690.2	AT4G16143.2;AT4G16143.1	Symbols: IMPA-2 | importin alpha isoform 2 | chr4:9134450-9137134 REVERSE LENGTH=535;Symbols: IMPA-2 | importin alpha isoform 2 | chr4:9134450-9137134 REVERSE LENGTH=535	72;93;112;313;331;428;429;434;536
4	4	17.9	17.9	19.377	0	60.387	3417500	15	11	11	11	11	20.5323	19.9801	20.1249	20.2124	593.224	6.20813e-07	AT5G65220.1	AT5G65220.1	Symbols: | Ribosomal L29 family protein | chr5:26061301-26062506 FORWARD LENGTH=173	251;294;422;483
6	2	11.3	3.1	77.993	0	32.112	1038700	3	11	11	11	11	18.6036	18.4602	18.6459	18.5699	190.011	1.82095e-08	AT3G03940.1;AT2G25760.1;AT2G25760.2	AT3G03940.1	Symbols: | Protein kinase family protein | chr3:1014412-1018244 REVERSE LENGTH=701	158;160;180;208;274;289
6	4	9.7	6.4	78.639	0	39.868	937160	9	11	11	11	11	18.2863	18.3097	18.4347	18.3436	162.417	9.28492e-09	AT3G13670.1	AT3G13670.1	Symbols: | Protein kinase family protein | chr3:4469434-4473234 FORWARD LENGTH=703	159;180;275;306;312;394
2	2	4.3	4.3	62.586	0	12.334	609020	3	11	11	11	11	17.8654	17.6375	17.7698	17.7576	108.202	5.4838e-08	AT1G34190.1	AT1G34190.1	Symbols: ANAC017, NAC017 | NAC domain containing protein 17 | chr1:12451729-12453914 FORWARD LENGTH=557	319;522
1	1	7	7	16.033	0	5.9791	583690	3	11	11	11	11	17.9267	17.3719	17.6975	17.6654	101.504	2.03204e-06	AT2G33450.1	AT2G33450.1	Symbols: | Ribosomal L28 family | chr2:14173620-14174380 FORWARD LENGTH=143	252
3	3	12.9	12.9	41.285	0	20.98	562260	4	11	11	11	11	18.1003	16.8289	17.0814	17.3368	80.8311	8.2777e-05	AT5G23060.1	AT5G23060.1	Symbols: CaS | calcium sensing receptor | chr5:7736760-7738412 REVERSE LENGTH=387	184;503;509
2	2	9.5	9.5	24.173	0	11.324	388970	3	11	11	11	11	16.5863	16.6802	16.8455	16.704	52.1285	1.86432e-07	AT1G31330.1	AT1G31330.1	Symbols: PSAF | photosystem I subunit F | chr1:11215011-11215939 REVERSE LENGTH=221	97;102
2	2	7.9	7.9	32.645	0	15.692	619940	2	16.3773	11	11	12.7924	17.9538	17.2048	17.1119	17.4235	24.7793	0.0629316	AT2G33800.1	AT2G33800.1	Symbols: | Ribosomal protein S5 family protein | chr2:14300925-14302352 REVERSE LENGTH=303	46;234
1	1	1.6	1.6	104.83	0	6.0184	29621000	2	11	11	11	11	24.6389	11	11	15.5463	23.3652	0.373901	AT1G26680.1	AT1G26680.1	Symbols: | transcriptional factor B3 family protein | chr1:9219552-9223193 FORWARD LENGTH=920	138
2	2	13.1	13.1	14.804	0	13.517	433570	3	11	11	11	11	11	17.5249	17.4171	15.314	19.8903	0.116144	AT5G59850.1;AT1G07770.2;AT1G07770.1;AT3G46040.1;AT2G39590.1	AT5G59850.1;AT1G07770.2;AT1G07770.1;AT3G46040.1;AT2G39590.1	Symbols: | Ribosomal protein S8 family protein | chr5:24112499-24113084 REVERSE LENGTH=130;Symbols: RPS15A | ribosomal protein S15A | chr1:2408413-2409065 REVERSE LENGTH=130;Symbols: RPS15A | ribosomal protein S15A | chr1:2408413-2409065 REVERSE LENGTH	231;235
2	2	14.7	14.7	16.948	0	11.732	404590	3	11	11	11	11	11	17.0959	17.5231	15.2063	18.4598	0.116572	AT5G08180.2;AT5G08180.1	AT5G08180.2;AT5G08180.1	Symbols: | Ribosomal protein L7Ae/L30e/S12e/Gadd45 family protein | chr5:2631843-2633374 REVERSE LENGTH=156;Symbols: | Ribosomal protein L7Ae/L30e/S12e/Gadd45 family protein | chr5:2631843-2633374 REVERSE LENGTH=156	152;285
2	2	14.8	14.8	27.54	0	11.496	747520	4	11	17.1371	11	13.0457	17.4228	17.0524	17.1139	17.1964	17.7611	0.112753	AT3G52220.1	AT3G52220.1	Symbols: | CONTAINS InterPro DOMAIN/s: Kinase phosphorylation domain (InterPro:IPR019315);Has 8882 Blast hits to 4920 proteins in 346 species: Archae - 10;Bacteria - 184;Metazoa - 3955;Fungi - 1221;Plants - 712;Viruses - 24;Other Eukaryotes - 2776	186;486
2	2	7.7	7.7	12.834	0	66.205	96028000	7	24.7181	11	23.7798	19.8326	22.589	24.6179	24.1926	23.7998	15.6403	0.42471	CON__P06328;CON__P01754;CON__P06329;CON__P01751;CON__P01757;CON__P01756;CON__P01750;CON__P01749;CON__P06330;CON__P03980	CON__P06328;CON__P01754;CON__P06329;CON__P01751;CON__P01757;CON__P01756;CON__P01750;CON__P01749;CON__P06330;CON__P03980	;;;;;;;;;	47;417
3	3	5.7	5.7	58.673	0	17.83	760610	5	11	15.712	15.0511	13.921	17.6387	18.5449	17.4767	17.8868	15.6244	0.0584076	AT1G56110.1;AT3G12860.1	AT1G56110.1;AT3G12860.1	Symbols: NOP56 | homolog of nucleolar protein NOP56 | chr1:20984544-20986893 REVERSE LENGTH=522;Symbols: | NOP56-like pre RNA processing ribonucleoprotein | chr3:4091678-4093921 FORWARD LENGTH=499	143;402;549
20	8	37.5	14.1	71.357	0	142.95	2530500	19	16.0724	15.8327	15.6912	15.8654	19.6465	19.8263	19.8384	19.7704	14.9798	6.74449e-06	AT5G02500.1;AT5G02500.2;AT3G12580.1	AT5G02500.1;AT5G02500.2	Symbols: HSC70-1, HSP70-1, AT-HSC70-1, HSC70 | heat shock cognate protein 70-1 | chr5:554055-556334 REVERSE LENGTH=651;Symbols: HSC70-1, HSP70-1, AT-HSC70-1, HSC70 | heat shock cognate protein 70-1 | chr5:554055-556334 REVERSE LENGTH=521	41;44;54;96;100;107;113;125;140;211;212;213;318;329;347;411;447;485;500;525
2	2	8.9	8.9	22.196	0	11.51	418650	2	11	11	11	11	17.02	16.6224	11	14.8808	14.7312	0.11658	AT3G02560.2;AT3G02560.1;AT5G16130.1	AT3G02560.2;AT3G02560.1;AT5G16130.1	Symbols: | Ribosomal protein S7e family protein | chr3:542341-543168 FORWARD LENGTH=191;Symbols: | Ribosomal protein S7e family protein | chr3:542341-543168 FORWARD LENGTH=191;Symbols: | Ribosomal protein S7e family protein | chr5:5268984-5269912 FOR	48;83
5	5	19.3	19.3	30.878	0	32.383	649460	7	11	15.3187	15.7167	14.0118	17.7381	17.9832	17.2937	17.6717	12.6395	0.0741975	AT2G41840.1;AT3G57490.1;AT1G59359.1;AT1G58983.1;AT1G58684.1;AT1G58380.1	AT2G41840.1;AT3G57490.1;AT1G59359.1;AT1G58983.1;AT1G58684.1;AT1G58380.1	Symbols: | Ribosomal protein S5 family protein | chr2:17460016-17461398 REVERSE LENGTH=285;Symbols: | Ribosomal protein S5 family protein | chr3:21279824-21280887 REVERSE LENGTH=276;Symbols: | Ribosomal protein S5 family protein | chr1:21842537-21843	25;259;436;490;516
4	4	7.7	7.7	63.098	0	25.694	870770	8	14.4007	14.5073	14.6334	14.5138	18.5334	17.9869	17.817	18.1124	12.114	9.14854e-05	AT2G16940.1;AT2G16940.3;AT2G16940.2	AT2G16940.1;AT2G16940.3;AT2G16940.2	Symbols: | Splicing factor, CC1-like | chr2:7342869-7347052 REVERSE LENGTH=561;Symbols: | Splicing factor, CC1-like | chr2:7342869-7347052 REVERSE LENGTH=599;Symbols: | Splicing factor, CC1-like | chr2:7342869-7347052 REVERSE LENGTH=610	89;156;257;487
1	1	2.2	2.2	42.243	0.0082645	5.8818	5718600	2	11	11	11	11	21.3986	11	11	14.4662	11.0518	0.373901	AT2G37630.1	AT2G37630.1	Symbols: ATPHAN, AS1, ATMYB91, MYB91 | myb-like HTH transcriptional regulator family protein | chr2:15781798-15782901 REVERSE LENGTH=367	198
3	1	25.8	9.7	14.018	0	64.607	5589800	8	11	11	11	11	11	11	20.6185	14.2062	9.22884	0.373901	AT3G05560.3;AT3G05560.2;AT3G05560.1	AT3G05560.3;AT3G05560.2;AT3G05560.1	Symbols: | Ribosomal L22e protein family | chr3:1614641-1615204 FORWARD LENGTH=124;Symbols: | Ribosomal L22e protein family | chr3:1614641-1615204 FORWARD LENGTH=124;Symbols: | Ribosomal L22e protein family | chr3:1614641-1615204 FORWARD LENGTH=124	14;221;233
6	6	13.6	13.6	63.026	0	39.763	720370	5	11	16.3866	16.2035	14.53	17.2018	18.2619	17.4095	17.6244	8.54076	0.159884	AT3G57150.1	AT3G57150.1	Symbols: NAP57, AtNAP57, CBF5, AtCBF5 | homologue of NAP57 | chr3:21154255-21155952 REVERSE LENGTH=565	10;23;69;76;388;463
1	1	2.2	2.2	67.767	0	6.736	1852200	2	11	11	11	11	11	11	19.9167	13.9722	7.84754	0.373901	AT4G25940.1	AT4G25940.1	Symbols: | ENTH/ANTH/VHS superfamily protein | chr4:13169792-13172700 REVERSE LENGTH=601	353
3	1	25.8	9.7	14.047	0	12.349	2929500	5	11	11	11	11	11	19.885	11	13.9617	7.7903	0.373901	AT5G27770.1	AT5G27770.1	Symbols: | Ribosomal L22e protein family | chr5:9836166-9837113 FORWARD LENGTH=124	13;221;233
4	4	33.9	33.9	6.887	0	37.874	6301300	8	18.2563	17.8135	18.0078	18.0259	21.4649	21.3131	19.9628	20.9136	7.40119	0.00428051	AT5G56670.1;AT4G29390.1;AT2G19750.1	AT5G56670.1;AT4G29390.1;AT2G19750.1	Symbols: | Ribosomal protein S30 family protein | chr5:22935413-22935981 REVERSE LENGTH=62;Symbols: | Ribosomal protein S30 family protein | chr4:14465212-14465902 REVERSE LENGTH=62;Symbols: | Ribosomal protein S30 family protein | chr2:8515037-85158	148;149;173;384
12	12	9.9	9.9	133.03	0	85.99	3103400	23	16.7884	17.2892	17.1377	17.0718	20.2069	20.3007	19.3587	19.9555	7.3805	0.000992671	AT1G20920.1;AT1G20920.2;AT3G09620.1	AT1G20920.1;AT1G20920.2	Symbols: | P-loop containing nucleoside triphosphate hydrolases superfamily protein | chr1:7285342-7288842 FORWARD LENGTH=1166;Symbols: | P-loop containing nucleoside triphosphate hydrolases superfamily protein | chr1:7286356-7288842 FORWARD LENGTH=828	22;68;219;246;247;258;288;321;333;400;465;515
4	4	26.2	26.2	19.775	0	24.459	634990	9	14.6927	14.9175	14.8892	14.8331	17.3757	17.1359	18.3316	17.6144	6.87474	0.00171104	AT5G45775.1;AT5G45775.2;AT4G18730.1;AT3G58700.1;AT2G42740.1	AT5G45775.1;AT5G45775.2;AT4G18730.1;AT3G58700.1;AT2G42740.1	Symbols: | Ribosomal L5P family protein | chr5:18565281-18566377 REVERSE LENGTH=172;Symbols: | Ribosomal L5P family protein | chr5:18565281-18566496 REVERSE LENGTH=182;Symbols: RPL16B | ribosomal protein L16B | chr4:10302238-10303206 FORWARD LENGTH=18	28;199;314;513
5	5	28.3	28.3	21.922	0	29.687	1747300	8	16.1763	16.3888	16.6067	16.3906	19.5542	18.8328	18.8812	19.0894	6.49282	0.000515146	AT1G48830.2;AT1G48830.1	AT1G48830.2;AT1G48830.1	Symbols: | Ribosomal protein S7e family protein | chr1:18059854-18060935 REVERSE LENGTH=191;Symbols: | Ribosomal protein S7e family protein | chr1:18059854-18060935 REVERSE LENGTH=191	17;84;88;142;472
6	6	21.2	21.2	60.665	0	38.315	2483600	13	16.5684	16.8582	16.7752	16.7339	19.9499	19.7859	18.1513	19.2957	5.90441	0.0115792	AT4G36690.4;AT4G36690.1;AT4G36690.2;AT4G36690.3	AT4G36690.4;AT4G36690.1;AT4G36690.2;AT4G36690.3	Symbols: ATU2AF65A | U2 snRNP auxilliary factor, large subunit, splicing factor | chr4:17294139-17297609 REVERSE LENGTH=551;Symbols: ATU2AF65A | U2 snRNP auxilliary factor, large subunit, splicing factor | chr4:17294139-17297609 REVERSE LENGTH=573;Symbo	62;128;129;206;389;448
1	1	1.1	1.1	67.754	0	6.15	1519500	3	11	11	11	11	11	11	18.5836	13.5279	5.76721	0.373901	AT2G22600.1	AT2G22600.1	Symbols: | RNA-binding KH domain-containing protein | chr2:9596617-9599050 FORWARD LENGTH=632	403
1	1	7.7	7.7	15.735	0	6.0982	814650	3	11	11	11	11	11	11	18.0778	13.3593	5.13104	0.373901	AT5G02960.1;AT3G09680.1	AT5G02960.1;AT3G09680.1	Symbols: | Ribosomal protein S12/S23 family protein | chr5:693280-694396 REVERSE LENGTH=142;Symbols: | Ribosomal protein S12/S23 family protein | chr3:2969197-2970291 REVERSE LENGTH=142	528
1	1	9	9	15.419	0	6.1703	434520	1	11	11	11	11	11	11	17.9452	13.3151	4.97625	0.373901	AT5G28060.1;AT3G04920.1	AT5G28060.1;AT3G04920.1	Symbols: | Ribosomal protein S24e family protein | chr5:10069791-10070792 REVERSE LENGTH=133;Symbols: | Ribosomal protein S24e family protein | chr3:1360989-1362065 FORWARD LENGTH=133	254
4	4	18.6	18.6	36.914	0	26.202	854700	7	15.6372	15.9213	15.9484	15.8356	17.9092	18.5027	17.8851	18.099	4.80105	0.000550877	AT3G04120.1;AT1G13440.1;AT1G13440.2	AT3G04120.1;AT1G13440.1;AT1G13440.2	Symbols: GAPC, GAPC-1, GAPC1 | glyceraldehyde-3-phosphate dehydrogenase C subunit 1 | chr3:1081077-1083131 FORWARD LENGTH=338;Symbols: GAPC-2, GAPC2 | glyceraldehyde-3-phosphate dehydrogenase C2 | chr1:4608465-4610494 REVERSE LENGTH=338;Symbols: GAPC-2,	1;132;468;523
1	1	2	2	94.459	0	5.9043	1077100	2	11	11	11	11	11	17.4014	11	13.1338	4.38873	0.373901	AT5G37500.1	AT5G37500.1	Symbols: GORK | gated outwardly-rectifying K+ channel | chr5:14889758-14894883 REVERSE LENGTH=820	238
1	1	6.4	6.4	20.982	0	6.3969	384140	2	11	11	11	11	11	11	17.3459	13.1153	4.33276	0.373901	AT3G03920.1	AT3G03920.1	Symbols: | H/ACA ribonucleoprotein complex, subunit Gar1/Naf1 protein | chr3:1009123-1010379 REVERSE LENGTH=202	223
2	2	5.4	5.4	48.5	0	12.286	332040	3	15.4317	16.0133	11	14.1483	16.0915	16.5039	16.1315	16.2423	4.26919	0.257863	AT2G39730.3;AT2G39730.2;AT2G39730.1	AT2G39730.3;AT2G39730.2;AT2G39730.1	Symbols: RCA | rubisco activase | chr2:16571174-16573345 REVERSE LENGTH=441;Symbols: RCA | rubisco activase | chr2:16571046-16573345 REVERSE LENGTH=446;Symbols: RCA | rubisco activase | chr2:16570951-16573345 REVERSE LENGTH=474	175;332
1	1	5.3	5.3	34.66	0.0080645	5.8585	81196	1	11	11	11	11	11	11	17.0609	13.0203	4.05665	0.373901	AT1G04770.1	AT1G04770.1	Symbols: | Tetratricopeptide repeat (TPR)-like superfamily protein | chr1:1336564-1337767 REVERSE LENGTH=303	376
14	5	27.9	10.3	71.147	0	31.775	1029000	10	15.869	15.896	15.8227	15.8626	17.4958	18.5866	17.5184	17.8669	4.01207	0.00512475	AT3G09440.2;AT3G09440.1	AT3G09440.2;AT3G09440.1	Symbols: | Heat shock protein 70 (Hsp 70) family protein | chr3:2903434-2905632 REVERSE LENGTH=649;Symbols: | Heat shock protein 70 (Hsp 70) family protein | chr3:2903434-2905632 REVERSE LENGTH=649	40;44;54;107;113;147;212;213;317;329;346;485;500;526
1	1	4.4	4.4	52.281	0	5.9618	1525100	1	11	11	11	11	11	11	16.9584	12.9861	3.96177	0.373901	AT1G64760.2;AT1G64760.1	AT1G64760.2;AT1G64760.1	Symbols: | O-Glycosyl hydrolases family 17 protein | chr1:24054220-24056194 REVERSE LENGTH=481;Symbols: | O-Glycosyl hydrolases family 17 protein | chr1:24054220-24056194 REVERSE LENGTH=481	551
1	1	6.9	6.9	25.519	0	6.8683	139140	1	11	11	11	11	11	11	16.9268	12.9756	3.93294	0.373901	AT3G32410.1;AT2G25050.1;AT2G25050.2	AT3G32410.1;AT2G25050.1;AT2G25050.2	Symbols: | BEST Arabidopsis thaliana protein match is: Actin-binding FH2 (Formin Homology) protein (TAIR:AT2G25050.2);Has 30201 Blast hits to 17322 proteins in 780 species: Archae - 12;Bacteria - 1396;Metazoa - 17338;Fungi - 3422;Plants - 5037;Viru	452
1	1	5	5	24.917	0	7.1092	253980	3	11	11	11	11	11	11	16.9146	12.9715	3.92186	0.373901	AT1G14320.1;AT1G66580.1;AT1G26910.1	AT1G14320.1;AT1G66580.1;AT1G26910.1	Symbols: SAC52, RPL10, RPL10A | Ribosomal protein L16p/L10e family protein | chr1:4888270-4889408 FORWARD LENGTH=220;Symbols: SAG24, RPL10C | senescence associated gene 24 | chr1:24839208-24840439 FORWARD LENGTH=221;Symbols: RPL10B | Ribosomal protein L	494
1	1	3	3	28.054	0.0078125	5.8374	246320	1	11	11	11	11	11	11	16.6297	12.8766	3.672	0.373901	AT2G34420.1;AT2G05100.1;AT2G05070.1;AT3G27690.1;AT2G34430.1;AT1G29930.1;AT1G29920.1;AT1G29910.1	AT2G34420.1;AT2G05100.1;AT2G05070.1;AT3G27690.1;AT2G34430.1;AT1G29930.1;AT1G29920.1;AT1G29910.1	Symbols: LHB1B2, LHCB1.5 | photosystem II light harvesting complex gene B1B2 | chr2:14522716-14523513 REVERSE LENGTH=265;Symbols: LHCB2.1, LHCB2 | photosystem II light harvesting complex gene 2.1 | chr2:1823449-1824331 REVERSE LENGTH=265;Symbols: LHCB2.	130
2	1	7.3	4	26.558	0	19.953	1203500	6	11	11	11	11	11	11	16.6243	12.8748	3.66741	0.373901	CON__P07477	CON__P07477		338;469
1	1	13.1	13.1	11.925	0	7.0531	314090	1	11	11	11	11	11	11	16.6211	12.8737	3.66474	0.373901	AT4G39200.2;AT4G39200.1;AT4G34555.1;AT2G16360.1	AT4G39200.2;AT4G39200.1;AT4G34555.1;AT2G16360.1	Symbols: | Ribosomal protein S25 family protein | chr4:18257464-18258464 FORWARD LENGTH=107;Symbols: | Ribosomal protein S25 family protein | chr4:18257464-18258464 FORWARD LENGTH=108;Symbols: | Ribosomal protein S25 family protein | chr4:16504381-16	518
1	1	2.4	2.4	73.52	0	8.9216	300840	1	11	11	11	11	11	11	16.615	12.8717	3.65952	0.373901	AT1G68400.1	AT1G68400.1	Symbols: | leucine-rich repeat transmembrane protein kinase family protein | chr1:25646401-25648916 REVERSE LENGTH=670	127
1	1	2.7	2.7	55.961	0	5.8982	395080	1	11	11	11	11	11	11	16.5283	12.8428	3.58695	0.373901	AT3G62330.1	AT3G62330.1	Symbols: | Zinc knuckle (CCHC-type) family protein | chr3:23063329-23065419 REVERSE LENGTH=479	196
5	5	13.9	13.9	59.002	0	71.729	1519300	9	16.4368	17.2687	16.8397	16.8484	17.7081	19.3065	18.902	18.6389	3.4592	0.0289244	AT3G05060.1	AT3G05060.1	Symbols: | NOP56-like pre RNA processing ribonucleoprotein | chr3:1413174-1415564 REVERSE LENGTH=533	124;237;256;281;491
1	1	10.2	10.2	12.783	0	6.0502	299600	3	11	11	11	11	11	11	16.3392	12.7797	3.43366	0.373901	AT2G38140.1	AT2G38140.1	Symbols: PSRP4 | plastid-specific ribosomal protein 4 | chr2:15980948-15981459 FORWARD LENGTH=118	215
2	1	5.3	2.9	50.078	0.0079365	5.8535	199380	1	11	11	11	11	11	11	16.322	12.774	3.42004	0.373901	AT1G09270.3;AT1G09270.2;AT1G09270.1	AT1G09270.3;AT1G09270.2;AT1G09270.1	Symbols: IMPA-4 | importin alpha isoform 4 | chr1:2995162-2997833 FORWARD LENGTH=456;Symbols: IMPA-4 | importin alpha isoform 4 | chr1:2994506-2997833 FORWARD LENGTH=538;Symbols: IMPA-4 | importin alpha isoform 4 | chr1:2994506-2997833 FORWARD LENGTH=53	331;537
1	1	11.9	11.9	12.06	0	6.5421	197160	2	11	11	11	11	11	11	16.2925	12.7642	3.39679	0.373901	ATCG00650.1	ATCG00650.1	Symbols: RPS18 | ribosomal protein S18 | chrC:67917-68222 FORWARD LENGTH=101	218
1	1	11.6	11.6	13.251	0	5.9554	268120	1	11	11	11	11	11	11	16.2603	12.7534	3.37157	0.373901	CON__P84750	CON__P84750		381
1	1	1.8	1.8	93.217	0	5.9795	492180	1	11	11	11	11	11	11	16.2493	12.7498	3.36301	0.373901	AT2G34710.1	AT2G34710.1	Symbols: PHB, ATHB14, ATHB-14, PHB-1D | Homeobox-leucine zipper family protein / lipid-binding START domain-containing protein | chr2:14639548-14643993 REVERSE LENGTH=852	250
1	1	9.7	9.7	16.089	0	6.301	201790	2	11	11	11	11	11	11	16.2451	12.7484	3.35981	0.373901	AT2G24090.1	AT2G24090.1	Symbols: | Ribosomal protein L35 | chr2:10242038-10243416 FORWARD LENGTH=145	399
1	1	9.3	9.3	9.3939	0.0075758	5.8227	231300	1	11	11	11	11	11	16.2395	11	12.7465	3.35544	0.373901	AT1G07660.2;AT5G59970.1;AT5G59690.1;AT3G53730.1;AT3G46320.1;AT3G45930.1;AT2G28740.1;AT1G07820.2;AT1G07820.1;AT1G07660.1	AT1G07660.2;AT5G59970.1;AT5G59690.1;AT3G53730.1;AT3G46320.1;AT3G45930.1;AT2G28740.1;AT1G07820.2;AT1G07820.1;AT1G07660.1	Symbols: | Histone superfamily protein | chr1:2369212-2369523 FORWARD LENGTH=86;Symbols: | Histone superfamily protein | chr5:24146352-24146663 REVERSE LENGTH=103;Symbols: | Histone superfamily protein | chr5:24051649-24051960 FORWARD LENGTH=103;Sym	205
5	5	9.4	9.4	94.141	0	66.155	1982600	12	17.254	17.4531	17.1387	17.2819	19.5587	18.7717	18.7399	19.0235	3.34387	0.00354274	AT5G16780.1	AT5G16780.1	Symbols: DOT2, MDF | SART-1 family | chr5:5517784-5521566 REVERSE LENGTH=820	7;94;177;204;439
3	2	22.2	14.4	20.216	0	19.541	1707700	3	11	18.3972	11	13.4657	16.0581	18.4142	11	15.1574	3.23038	0.634816	AT1G67090.1;AT1G67090.2	AT1G67090.1	Symbols: RBCS1A | ribulose bisphosphate carboxylase small chain 1A | chr1:25048465-25049249 REVERSE LENGTH=180	120;243;292
2	1	15.4	9.8	14.331	0	12.312	179790	3	11	11	11	11	11	11	16.0727	12.6909	3.22856	0.373901	AT5G02610.1;AT2G39390.1;AT5G02610.2	AT5G02610.1;AT2G39390.1;AT5G02610.2	Symbols: | Ribosomal L29 family protein | chr5:587611-588547 FORWARD LENGTH=123;Symbols: | Ribosomal L29 family protein | chr2:16450803-16451762 REVERSE LENGTH=123;Symbols: | Ribosomal L29 family protein | chr5:587611-588547 FORWARD LENGTH=146	8;407
1	1	3.6	3.6	25.696	0	6.0286	331820	3	11	11	11	11	11	11	16.0576	12.6859	3.21733	0.373901	AT5G12230.1	AT5G12230.1	Symbols: MED19A | MED19A;BEST Arabidopsis thaliana protein match is: unknown protein (TAIR:AT5G19480.2);Has 1807 Blast hits to 1807 proteins in 277 species: Archae - 0;Bacteria - 0;Metazoa - 736;Fungi - 347;Plants - 385;Viruses - 0;Other Eukaryote	269
5	5	21.5	21.5	24.705	0	30.669	1846000	10	17.1768	17.37	17.3242	17.2903	19.5635	18.8639	18.3809	18.9361	3.12912	0.00912785	AT1G05190.1	AT1G05190.1	Symbols: emb2394 | Ribosomal protein L6 family | chr1:1502515-1503738 REVERSE LENGTH=223	118;232;280;401;553
2	2	12.9	12.9	22.017	0	12.338	185740	3	11	11	11	11	11	15.9296	11	12.6432	3.12355	0.373901	AT1G33140.1;AT1G33120.1;AT4G10450.1	AT1G33140.1;AT1G33120.1;AT4G10450.1	Symbols: PGY2 | Ribosomal protein L6 family | chr1:12023360-12024502 FORWARD LENGTH=194;Symbols: | Ribosomal protein L6 family | chr1:12010986-12012223 FORWARD LENGTH=194;Symbols: | Ribosomal protein L6 family | chr4:6463201-6464458 REVERSE LENGTH=194	150;506
1	1	1	1	188.19	0	6.6517	368840	3	11	11	11	11	11	11	15.9292	12.6431	3.12328	0.373901	AT3G12980.1	AT3G12980.1	Symbols: HAC5, ATHPCAT4 | histone acetyltransferase of the CBP family 5 | chr3:4146919-4154495 FORWARD LENGTH=1670	378
1	1	5.7	5.7	16.036	0	6.8774	195950	3	11	11	11	11	15.8372	11	11	12.6124	3.05762	0.373901	AT3G10610.1;AT2G05220.2;AT2G05220.1;AT5G04800.4;AT5G04800.3;AT5G04800.2;AT5G04800.1;AT2G04390.1	AT3G10610.1;AT2G05220.2;AT2G05220.1;AT5G04800.4;AT5G04800.3;AT5G04800.2;AT5G04800.1;AT2G04390.1	Symbols: | Ribosomal S17 family protein | chr3:3319459-3319881 FORWARD LENGTH=140;Symbols: | Ribosomal S17 family protein | chr2:1894757-1895179 REVERSE LENGTH=140;Symbols: | Ribosomal S17 family protein | chr2:1894757-1895179 REVERSE LENGTH=140;Sym	385
1	1	7	7	29.749	0	7.0908	426940	5	11	11	11	11	11	11	15.8133	12.6044	3.04075	0.373901	AT3G15356.1	AT3G15356.1	Symbols: | Legume lectin family protein | chr3:5174603-5175418 REVERSE LENGTH=271	60
9	1	13.9	1.8	63.165	0.0075188	5.8176	201090	1	11	11	11	11	11	15.724	11	12.5747	2.97864	0.373901	CON__ENSEMBL:ENSBTAP00000038253	CON__ENSEMBL:ENSBTAP00000038253		39;90;135;260;263;350;425;426;467
1	1	6.2	6.2	27.939	0	7.9279	182310	4	11	11	11	11	11	11	15.7039	12.568	2.96487	0.373901	AT2G44120.1;AT2G44120.2	AT2G44120.1;AT2G44120.2	Symbols: | Ribosomal protein L30/L7 family protein | chr2:18249227-18250402 REVERSE LENGTH=242;Symbols: | Ribosomal protein L30/L7 family protein | chr2:18249227-18250417 REVERSE LENGTH=247	200
1	1	4.8	4.8	29.363	0	6.7261	153760	2	11	11	11	11	11	11	15.577	12.5257	2.87923	0.373901	AT2G43030.1	AT2G43030.1	Symbols: | Ribosomal protein L3 family protein | chr2:17894898-17895713 FORWARD LENGTH=271	24
1	1	2	2	73.466	0	6.6768	279100	4	11	11	11	11	11	11	15.5394	12.5131	2.85431	0.373901	AT5G60250.1	AT5G60250.1	Symbols: | zinc finger (C3HC4-type RING finger) family protein | chr5:24252226-24254710 FORWARD LENGTH=655	459
1	1	5.2	5.2	27.458	0	6.6065	100330	2	11	11	11	11	11	11	15.4777	12.4926	2.81387	0.373901	AT5G35530.1;AT3G53870.1;AT2G31610.1	AT5G35530.1;AT3G53870.1;AT2G31610.1	Symbols: | Ribosomal protein S3 family protein | chr5:13710355-13712192 REVERSE LENGTH=248;Symbols: | Ribosomal protein S3 family protein | chr3:19951547-19952782 FORWARD LENGTH=249;Symbols: | Ribosomal protein S3 family protein | chr2:13450384-13451	106
5	3	17.4	10.9	37.667	0	36.593	579920	8	15.4859	15.768	15.8119	15.6886	16.7997	17.185	17.5263	17.1703	2.79284	0.00315573	AT1G12900.4;AT1G12900.3;AT3G26650.1;AT1G12900.1;AT1G12900.2	AT1G12900.4;AT1G12900.3;AT3G26650.1;AT1G12900.1;AT1G12900.2	Symbols: GAPA-2 | glyceraldehyde 3-phosphate dehydrogenase A subunit 2 | chr1:4392634-4393850 REVERSE LENGTH=350;Symbols: GAPA-2 | glyceraldehyde 3-phosphate dehydrogenase A subunit 2 | chr1:4392634-4393850 REVERSE LENGTH=350;Symbols: GAPA, GAPA-1 | gly	0;457;495;505;533
1	1	14.4	14.4	16.984	0	6.1304	313830	1	11	11	11	11	11	11	15.3854	12.4618	2.75451	0.373901	AT1G20340.1	AT1G20340.1	Symbols: DRT112, PETE2 | Cupredoxin superfamily protein | chr1:7042770-7043273 REVERSE LENGTH=167	342
1	1	2.6	2.6	73.895	0	5.9904	112190	0	11	11	11	11	11	15.364	11	12.4547	2.74091	0.373901	AT5G42340.1	AT5G42340.1	Symbols: PUB15 | Plant U-Box 15 | chr5:16928086-16930367 REVERSE LENGTH=660	239
1	1	2	2	63.341	0.0081301	5.8722	131780	1	11	11	11	11	11	11	15.0488	12.3496	2.54841	0.373901	AT3G13470.1;AT5G56500.2;AT5G56500.1;AT1G55490.2;AT1G55490.1	AT3G13470.1;AT5G56500.2;AT5G56500.1;AT1G55490.2;AT1G55490.1	Symbols: | TCP-1/cpn60 chaperonin family protein | chr3:4389685-4392624 FORWARD LENGTH=596;Symbols: | TCP-1/cpn60 chaperonin family protein | chr5:22874058-22876966 FORWARD LENGTH=597;Symbols: | TCP-1/cpn60 chaperonin family protein | chr5:22874058-2	261
1	1	1.8	1.8	79.838	0	5.9444	146880	1	11	11	11	11	11	11	14.9741	12.3247	2.50483	0.373901	AT3G60750.2;AT3G60750.1	AT3G60750.2;AT3G60750.1	Symbols: | Transketolase | chr3:22454004-22456824 FORWARD LENGTH=740;Symbols: | Transketolase | chr3:22454004-22456824 FORWARD LENGTH=741	410
1	1	2.1	2.1	81.196	0	9.6688	88345	0	11	11	11	11	11	14.9198	11	12.3066	2.47358	0.373901	AT2G25640.1	AT2G25640.1	Symbols: | SPOC domain / Transcription elongation factor S-II protein | chr2:10910836-10913908 FORWARD LENGTH=745	361
1	1	4.5	4.5	42.448	0.008	5.8564	30588	0	11	11	11	11	11	14.8091	11	12.2697	2.41112	0.373901	AT1G78090.1	AT1G78090.1	Symbols: ATTPPB, TPPB | trehalose-6-phosphate phosphatase | chr1:29373955-29376295 FORWARD LENGTH=374	476
4	1	10	2.8	48.105	0	6.2658	78086	1	11	11	11	11	14.4211	11	11	12.1404	2.20436	0.373901	CON__Q04695;CON__Q9QWL7	CON__Q04695;CON__Q9QWL7	;	20;117;265;511
1	1	1.2	1.2	160.41	0	6.2086	44981	0	11	11	11	11	11	14.3879	11	12.1293	2.18755	0.373901	AT3G23890.2;AT3G23890.1	AT3G23890.2;AT3G23890.1	Symbols: TOPII, ATTOPII | topoisomerase II | chr3:8624931-8631106 FORWARD LENGTH=1438;Symbols: TOPII, ATTOPII | topoisomerase II | chr3:8624931-8631106 FORWARD LENGTH=1473	504
1	1	1.6	1.6	48.931	0	5.992	721490	1	11	11	11	11	11	11	14.0846	12.0282	2.03946	0.373901	AT5G66470.1	AT5G66470.1	Symbols: | RNA binding;GTP binding | chr5:26541986-26544302 REVERSE LENGTH=427	249
2	2	9.1	9.1	26.353	0	11.748	270830	2	14.7623	15.015	15.2542	15.0105	16.7017	15.6126	15.6203	15.9782	1.95571	0.0674903	AT3G52720.2;AT3G52720.1	AT3G52720.2;AT3G52720.1	Symbols: CAH1, ATACA1, ACA1 | alpha carbonic anhydrase 1 | chr3:19539617-19541116 REVERSE LENGTH=230;Symbols: CAH1, ATACA1, ACA1 | alpha carbonic anhydrase 1 | chr3:19538804-19541116 REVERSE LENGTH=284	64;297
1	1	1.8	1.8	56.682	0	6.625	275100	1	11	11	11	11	11	11	13.8305	11.9435	1.9232	0.373901	CON__Q9NSB4	CON__Q9NSB4		123
34	34	58.8	58.8	91.847	0	298.76	62122000	152	22.6231	22.8433	22.9554	22.8072	24.0503	23.4121	23.6374	23.7	1.85668	0.0133246	AT3G15730.1;AT1G52570.1	AT3G15730.1	Symbols: PLDALPHA1, PLD | phospholipase D alpha 1 | chr3:5330835-5333474 FORWARD LENGTH=810	35;36;49;57;63;78;85;137;139;155;165;216;228;236;240;241;271;298;299;344;358;362;383;387;408;409;412;464;482;514;529;544;552;555
2	2	10.8	10.8	21.472	0	11.345	140080	2	11	11	11	11	11	11	13.6502	11.8834	1.8447	0.373901	AT3G59800.1;AT2G43795.1;AT2G43795.2	AT3G59800.1;AT2G43795.1;AT2G43795.2	Symbols: | unknown protein;BEST Arabidopsis thaliana protein match is: unknown protein (TAIR:AT2G43795.2);Has 15361 Blast hits to 8061 proteins in 537 species: Archae - 2;Bacteria - 622;Metazoa - 7561;Fungi - 1246;Plants - 920;Viruses - 49;Other	37;244
4	4	40.9	40.9	10.298	0	127.24	3962000	5	11	11	11	11	11	11	13.4769	11.8256	1.7723	0.373901	AT2G18740.1;AT2G18740.2;AT4G30330.1	AT2G18740.1;AT2G18740.2;AT4G30330.1	Symbols: | Small nuclear ribonucleoprotein family protein | chr2:8123334-8124710 FORWARD LENGTH=88;Symbols: | Small nuclear ribonucleoprotein family protein | chr2:8123334-8124581 FORWARD LENGTH=78;Symbols: | Small nuclear ribonucleoprotein family pr	153;217;222;226
4	4	9.5	9.5	55.328	0	23.132	1212700	4	17.3434	17.5739	17.5036	17.4737	17.8084	18.0544	18.9652	18.276	1.74393	0.0887414	ATCG00120.1	ATCG00120.1	Symbols: ATPA | ATP synthase subunit alpha | chrC:9938-11461 REVERSE LENGTH=507	201;279;471;508
1	1	22.4	22.4	7.3504	0	8.9536	307600	3	11	11	11	11	13.3383	11	11	11.7794	1.71646	0.373901	AT2G23930.2;AT3G11500.1;AT2G23930.1	AT2G23930.2;AT3G11500.1;AT2G23930.1	Symbols: SNRNP-G | probable small nuclear ribonucleoprotein G | chr2:10182496-10183026 FORWARD LENGTH=67;Symbols: | Small nuclear ribonucleoprotein family protein | chr3:3621626-3622474 REVERSE LENGTH=79;Symbols: SNRNP-G | probable small nuclear ribonu	178
1	1	2.6	2.6	35.17	0	5.9152	88712	2	11	11	11	11	11	11	13.2871	11.7624	1.69629	0.373901	AT5G64200.2;AT5G64200.1	AT5G64200.2;AT5G64200.1	Symbols: ATSC35, SC35, At-SC35 | ortholog of human splicing factor SC35 | chr5:25681849-25683553 REVERSE LENGTH=303;Symbols: ATSC35, SC35, At-SC35 | ortholog of human splicing factor SC35 | chr5:25681849-25683553 REVERSE LENGTH=303	534
1	1	1	1	119.07	0	6.1387	107510	1	11	11	11	11	11	11	13.0804	11.6935	1.61717	0.373901	AT3G51150.1;AT3G51150.2	AT3G51150.1;AT3G51150.2	Symbols: | ATP binding microtubule motor family protein | chr3:19002006-19006509 FORWARD LENGTH=1052;Symbols: | ATP binding microtubule motor family protein | chr3:19002006-19006509 FORWARD LENGTH=1054	104
10	2	19.9	6	60.024	0	18.288	311620	1	11	11	11	11	11	11	12.7755	11.5918	1.50716	0.373901	CON__P48668;CON__P02538;CON__P04259;CON__O95678	CON__P48668;CON__P02538;CON__P04259;CON__O95678	;;;	16;39;122;134;182;263;339;340;542;546
4	4	8.5	8.5	66.315	0	24.434	2170100	5	18.1159	18.2966	18.3862	18.2662	18.4756	19.4104	18.5337	18.8065	1.45427	0.159042	AT1G60900.1;AT1G60830.1	AT1G60900.1	Symbols: | U2 snRNP auxilliary factor, large subunit, splicing factor | chr1:22424008-22427806 FORWARD LENGTH=589	109;207;290;501
1	1	3.6	3.6	61.496	0	6.099	4983.7	0	11	11	11	11	12.1695	11	11	11.3898	1.31023	0.373901	AT3G29310.1	AT3G29310.1	Symbols: | calmodulin-binding protein-related | chr3:11249712-11251452 FORWARD LENGTH=551	197
3	3	12.9	12.9	34.451	0	20.675	8425100	11	20.2881	20.8866	19.6125	20.2624	21.8282	19.6498	20.0467	20.5083	1.18582	0.763781	AT3G29075.1	AT3G29075.1	Symbols: | glycine-rich protein | chr3:11051645-11052629 REVERSE LENGTH=294	363;365;456
1	1	1.7	1.7	111.13	0.0076923	5.8245	4459.9	0	11	11	11	11	11	11.5695	11	11.1898	1.14063	0.373901	AT3G47090.1	AT3G47090.1	Symbols: | Leucine-rich repeat protein kinase family protein | chr3:17341512-17344645 REVERSE LENGTH=1009	141
1	1	2.6	2.6	38.166	0	6.0676	96467	1	11	11	11	11	11	11	11.3895	11.1298	1.09416	0.373901	AT3G14420.4;AT3G14420.5;AT3G14420.6;AT3G14420.2;AT3G14420.1;AT3G14415.3;AT3G14415.1;AT3G14415.2	AT3G14420.4;AT3G14420.5;AT3G14420.6;AT3G14420.2;AT3G14420.1;AT3G14415.3;AT3G14415.1;AT3G14415.2	Symbols: | Aldolase-type TIM barrel family protein | chr3:4821861-4823899 FORWARD LENGTH=348;Symbols: | Aldolase-type TIM barrel family protein | chr3:4821829-4823899 FORWARD LENGTH=360;Symbols: | Aldolase-type TIM barrel family protein | chr3:482189	187
3	2	24.3	16.6	20.35	0	12.365	613190	7	16.8153	11	17.4527	15.0893	11	17.34	17.1852	15.1751	1.06124	0.97804	AT5G38420.1;AT5G38410.1;AT5G38410.3;AT5G38410.2;AT5G38430.1	AT5G38420.1;AT5G38410.1;AT5G38410.3;AT5G38410.2;AT5G38430.1	Symbols: | Ribulose bisphosphate carboxylase (small chain) family protein | chr5:15381203-15381978 REVERSE LENGTH=181;Symbols: | Ribulose bisphosphate carboxylase (small chain) family protein | chr5:15377501-15378306 REVERSE LENGTH=181;Symbols: | Rib	99;242;292
1	1	9.3	9.3	17.058	0	6.5048	0	0	11	11	11	11	11	11	11	11	1	#DIV/0!	AT1G04270.2;AT5G09510.1;AT1G04270.1	AT1G04270.2;AT5G09510.1;AT1G04270.1	Symbols: RPS15 | cytosolic ribosomal protein S15 | chr1:1141852-1142960 REVERSE LENGTH=151;Symbols: | Ribosomal protein S19 family protein | chr5:2955698-2956554 REVERSE LENGTH=152;Symbols: RPS15 | cytosolic ribosomal protein S15 | chr1:1141852-1142960	4
1	1	2.1	2.1	70.547	0	6.5684	0	0	11	11	11	11	11	11	11	11	1	#DIV/0!	AT1G37020.1	AT1G37020.1	Symbols: | Cysteine proteinases superfamily protein | chr1:14046735-14049742 FORWARD LENGTH=611	193
1	1	1.8	1.8	68.036	0.007874	5.8423	0	0	11	11	11	11	11	11	11	11	1	#DIV/0!	AT2G01730.1	AT2G01730.1	Symbols: ATCPSF73-II, EDA26, CPSF73-II | cleavage and polyadenylation specificity factor 73 kDa subunit-II | chr2:320597-323845 FORWARD LENGTH=613	324
1	1	3.4	3.4	43.65	0	6.2269	0	0	11	11	11	11	11	11	11	11	1	#DIV/0!	AT2G22690.2;AT2G22690.1	AT2G22690.2;AT2G22690.1	Symbols: | zinc ion binding | chr2:9649820-9650965 REVERSE LENGTH=381;Symbols: | zinc ion binding | chr2:9649820-9650965 REVERSE LENGTH=381	12
1	1	1	1	75.44	0.0076336	5.8237	0	0	11	11	11	11	11	11	11	11	1	#DIV/0!	AT3G09070.1	AT3G09070.1	Symbols: | Protein of unknown function (DUF740) | chr3:2768880-2770937 REVERSE LENGTH=685	443
2	1	12.2	6.5	14.285	0.0081967	5.8815	0	1	11	11	11	11	11	11	11	11	1	#DIV/0!	AT3G09500.1	AT3G09500.1	Symbols: | Ribosomal L29 family protein | chr3:2917047-2917895 FORWARD LENGTH=123	8;398
1	1	4.7	4.7	30.509	0	6.0012	0	1	11	11	11	11	11	11	11	11	1	#DIV/0!	AT3G16530.1	AT3G16530.1	Symbols: | Legume lectin family protein | chr3:5624586-5625416 REVERSE LENGTH=276	188
1	1	3.4	3.4	44.466	0	6.1323	0	0	11	11	11	11	11	11	11	11	1	#DIV/0!	AT3G17570.1	AT3G17570.1	Symbols: | F-box and associated interaction domains-containing protein | chr3:6009413-6010558 FORWARD LENGTH=381	328
1	1	4.1	4.1	51.458	0	7.1783	0	0	11	11	11	11	11	11	11	11	1	#DIV/0!	AT3G22890.1	AT3G22890.1	Symbols: APS1 | ATP sulfurylase 1 | chr3:8112837-8114734 FORWARD LENGTH=463	315
1	1	13.5	13.5	8.4729	0	6.4846	0	0	11	11	11	11	11	11	11	11	1	#DIV/0!	AT3G44440.1	AT3G44440.1	Symbols: | unknown protein;Has 1 Blast hits to 1 proteins in 1 species: Archae - 0;Bacteria - 0;Metazoa - 0;Fungi - 0;Plants - 1;Viruses - 0;Other Eukaryotes - 0 (source: NCBI BLink). | chr3:16070982-16071256 FORWARD LENGTH=74	538
1	1	8.6	8.6	17.545	0	12.151	0	0	11	11	11	11	11	11	11	11	1	#DIV/0!	AT4G09800.1;AT1G34030.1;AT1G22780.1	AT4G09800.1;AT1G34030.1;AT1G22780.1	Symbols: RPS18C | S18 ribosomal protein | chr4:6173818-6174963 FORWARD LENGTH=152;Symbols: | Ribosomal protein S13/S18 family | chr1:12370285-12371465 REVERSE LENGTH=152;Symbols: PFL, RPS18A, PFL1 | Ribosomal protein S13/S18 family | chr1:8067990-80691	430
1	1	2	2	78.746	0	6.0506	0	1	11	11	11	11	11	11	11	11	1	#DIV/0!	AT4G24100.1	AT4G24100.1	Symbols: | Protein kinase superfamily protein | chr4:12515223-12519336 FORWARD LENGTH=709	554
1	1	9.1	9.1	34.018	0	7.0154	0	0	11	11	11	11	11	11	11	11	1	#DIV/0!	AT4G27120.2;AT4G27120.1	AT4G27120.2;AT4G27120.1	Symbols: | CONTAINS InterPro DOMAIN/s: DDRGK domain (InterPro:IPR019153);Has 14775 Blast hits to 8764 proteins in 778 species: Archae - 29;Bacteria - 1878;Metazoa - 5164;Fungi - 1447;Plants - 582;Viruses - 164;Other Eukaryotes - 5511 (source: NCBI	305
1	1	19.3	19.3	9.8641	0	6.1581	0	0	11	11	11	11	11	11	11	11	1	#DIV/0!	AT4G30220.1	AT4G30220.1	Symbols: RUXF | small nuclear ribonucleoprotein F | chr4:14803100-14804259 REVERSE LENGTH=88	45
1	1	6.3	6.3	23.486	0	6.4039	0	0	11	11	11	11	11	11	11	11	1	#DIV/0!	AT5G11400.1	AT5G11400.1	Symbols: | Protein kinase superfamily protein | chr5:3637066-3638059 REVERSE LENGTH=206	322
1	1	3	3	44.462	0	5.9727	0	0	11	11	11	11	11	11	11	11	1	#DIV/0!	AT5G20310.1	AT5G20310.1	Symbols: | Adenine nucleotide alpha hydrolases-like superfamily protein | chr5:6857553-6859001 FORWARD LENGTH=394	316
1	1	6.3	6.3	21.071	0.0077519	5.8324	232400	1	11	11	11	11	11	11	11	11	1	#DIV/0!	AT5G62200.1	AT5G62200.1	Symbols: | Embryo-specific protein 3, (ATS3) | chr5:24984463-24985674 REVERSE LENGTH=190	406
4	4	11.1	11.1	41.786	0	24.825	1649000	10	17.5336	18.4187	18.9619	18.3047	17.6346	18.6716	18.4989	18.2684	0.975107	0.948146	AT5G53800.1	AT5G53800.1	Symbols: | unknown protein;Has 30201 Blast hits to 17322 proteins in 780 species: Archae - 12;Bacteria - 1396;Metazoa - 17338;Fungi - 3422;Plants - 5037;Viruses - 0;Other Eukaryotes - 2996 (source: NCBI BLink). | chr5:21848180-21849935 FORWARD LEN	210;282;386;488
7	2	17.5	7	51.267	0	11.963	342020	2	11	17.3355	11	13.1118	15.8676	11	11	12.6225	0.712367	0.863162	CON__P08779	CON__P08779		19;32;230;265;455;511;532
21	21	42.6	42.6	52.954	0	162.45	46129000	85	22.8107	22.754	22.8877	22.8175	20.8849	22.8054	22.8793	22.1899	0.647256	0.391561	ATCG00490.1;ATMG00280.1;AT2G07732.1	ATCG00490.1	Symbols: RBCL | ribulose-bisphosphate carboxylases | chrC:54958-56397 FORWARD LENGTH=479	15;18;26;56;59;70;73;81;103;114;136;163;164;170;171;270;304;311;458;496;541
21	21	67.9	67.9	35.704	0	323.31	1783200000	241	28.2723	28.9049	28.889	28.6887	28.0763	27.9446	28.0832	28.0347	0.6355	0.0373149	CON__P01868;CON__P01869;CON__P01859	CON__P01868;CON__P01869	;	30;31;52;55;58;86;95;181;351;352;364;433;450;451;484;498;519;520;521;530;531
14	14	97.2	97.2	11.778	0	323.31	745070000	190	26.9189	27.1406	26.8837	26.9811	26.2675	26.0777	26.5028	26.2827	0.616255	0.00894958	CON__P01837;CON__Q05B55	CON__P01837		3;61;66;67;79;80;194;195;202;374;375;480;481;540
6	6	34	34	19.087	0	51.33	7108900	19	19.8406	21.2794	21.0674	20.7291	19.6063	20.5097	19.8352	19.9837	0.596503	0.22801	AT1G79200.1	AT1G79200.1	Symbols: | unknown protein;Has 30201 Blast hits to 17322 proteins in 780 species: Archae - 12;Bacteria - 1396;Metazoa - 17338;Fungi - 3422;Plants - 5037;Viruses - 0;Other Eukaryotes - 2996 (source: NCBI BLink). | chr1:29794404-29795711 FORWARD LEN	98;343;390;454;489;556
3	3	6	6	78.285	0	18.493	481280	7	15.6723	17.816	16.9647	16.8176	16.5243	15.551	15.9164	15.9972	0.566284	0.297031	AT1G03910.1;AT1G03910.2	AT1G03910.1;AT1G03910.2	Symbols: | EXPRESSED IN: 25 plant structures;EXPRESSED DURING: 13 growth stages;CONTAINS InterPro DOMAIN/s: Cactin protein, cactus-binding domain, C-terminal (InterPro:IPR019134), Cactin, central region (InterPro:IPR018816);BEST Arabidopsis thaliana p	42;92;527
10	9	57.2	53.9	25.425	0	234.67	272340000	103	25.2543	25.7395	25.504	25.4993	25.1352	24.3107	24.4594	24.6351	0.549361	0.0406626	CON__P00760;CON__P00761	CON__P00760		29;77;276;284;296;338;396;413;441;497
11	2	19.7	3.4	62.378	0	43.542	1402800	5	18.2324	17.6167	17.6075	17.8189	17.1715	16.8438	16.7936	16.9363	0.542394	0.0207782	CON__P13647;CON__Q8VED5;CON__P05787;CON__P07744;CON__Q9DCV7;CON__Q3KNV1;CON__P08729;CON__Q9NSB2;CON__Q6ISB0;CON__H-INV:HIT000292931;CON__Q61726;CON__O43790;CON__P15241;CON__Q6NT21;CON__P78385;CON__P25691;CON__Q14533;CON__P78386;CON__Q8N1N4-2;CON__Q7RTT2	CON__P13647		38;122;134;229;263;339;340;349;440;542;545
8	2	21.2	7.8	51.621	0	42.58	540380	2	17.5089	17.1322	17.0165	17.2192	16.7916	16.0809	16.0618	16.3114	0.533013	0.0324565	CON__P02533;CON__P19012;CON__A2A4G1;CON__P08727;CON__P19001;CON__Q6IFX2;CON__Q61782;CON__ENSEMBL:ENSP00000377550;CON__P13646-1	CON__P02533		19;33;117;230;265;287;511;532
3	3	4.1	4.1	101.5	0	18.178	1110300	6	16.6733	19.0224	18.5243	18.0733	16.7834	17.109	17.1223	17.0049	0.476846	0.213636	AT5G23080.2;AT5G23080.1	AT5G23080.2;AT5G23080.1	Symbols: TGH | SWAP (Suppressor-of-White-APricot)/surp domain-containing protein | chr5:7743226-7748889 REVERSE LENGTH=900;Symbols: TGH | SWAP (Suppressor-of-White-APricot)/surp domain-containing protein | chr5:7743226-7748889 REVERSE LENGTH=930	108;278;479
22	22	47	47	62.129	0	207.78	29724000	80	23.0602	21.932	22.768	22.5867	22.0647	21.2685	20.6091	21.3141	0.413913	0.0778678	CON__P35527	CON__P35527		65;101;167;168;179;190;191;214;224;225;245;264;327;359;369;370;380;397;405;445;466;524
28	19	45.9	34.1	65.886	0	323.31	21530000	98	22.6757	21.7215	22.3099	22.2357	21.323	21.1863	20.2618	20.9237	0.40275	0.0390363	CON__P04264;CON__H-INV:HIT000016045	CON__P04264		5;6;82;90;135;144;161;203;262;291;302;326;334;335;339;341;348;372;404;415;416;423;425;426;460;467;474;475
19	19	53.8	53.8	49.258	0	157.18	19386000	76	21.8597	22.8658	22.8424	22.5226	21.0045	20.6512	20.9242	20.86	0.315853	0.0088199	AT1G31440.1	AT1G31440.1	Symbols: | SH3 domain-containing protein | chr1:11256150-11258479 REVERSE LENGTH=439	27;116;121;176;192;277;283;293;301;330;368;379;427;432;449;473;493;535;548
20	16	38.4	33.7	59.518	0	193.34	21417000	65	23.2029	21.8974	21.2503	22.1169	20.8561	20.4641	19.693	20.3378	0.291365	0.0562466	CON__P13645;CON__P02535-1;CON__Q7Z3Z0;CON__Q7Z3Y8;CON__Q148H6;CON__Q7Z3Y7;CON__P08730-1;CON__Q7Z3Y9;CON__Q9Z2K1;CON__Q3ZAW8;CON__Q99456	CON__P13645		9;21;53;110;183;227;265;273;286;345;354;356;377;391;421;424;437;438;512;532
24	15	48.7	34.3	65.865	0	184.2	8527200	39	21.8665	20.2066	20.8088	20.9607	19.571	19.5436	18.2646	19.1264	0.280442	0.0475135	CON__P35908;CON__Q9R0H5;CON__Q6NXH9;CON__Q7Z794;CON__REFSEQ:XP_932229;CON__Q14CN4-1;CON__Q6IME9;CON__Q3SY84;CON__Q7RTS7;CON__Q32MB2;CON__P19013	CON__P35908		39;91;122;131;135;157;166;169;185;189;203;260;263;336;337;340;355;418;419;446;478;499;547;550
2	2	24.3	24.3	11.462	0	21.7	115510000	14	24.3774	25.4807	25.3305	25.0628	20.4878	24.0943	24.0713	22.8845	0.220923	0.155622	CON__P04943;CON__P04942;CON__P04940;CON__P04944;CON__P04941	CON__P04943;CON__P04942;CON__P04940;CON__P04944;CON__P04941	;;;;	373;392
1	1	12.2	12.2	10.796	0	6.3171	1699200	5	18.7287	19.7674	18.9934	19.1632	17.0074	16.616	16.1456	16.5897	0.167998	0.0029735	AT1G54410.1	AT1G54410.1	Symbols: | dehydrin family protein | chr1:20310305-20310601 REVERSE LENGTH=98	209
7	7	18.4	18.4	66.5	0	49.619	2997200	16	19.4891	20.5821	20.3012	20.1241	16.244	16.4785	16.6246	16.449	0.0782848	0.000444596	AT1G65280.1	AT1G65280.1	Symbols: | DNAJ heat shock N-terminal domain-containing protein | chr1:24245501-24248521 FORWARD LENGTH=588	111;174;220;308;323;431;502

## Sheet: peptide IDs
Sequence	Proteins	id
AAALNIVPTSTGAAK	AT1G12900.4;AT1G12900.3;AT3G26650.1;AT1G12900.1;AT1G12900.2	0
AASFNIIPSSTGAAK	AT3G04120.1;AT1G13440.1;AT1G13440.2	1
AASYAAYVTGVSCAK	AT1G32230.2;AT1G32230.3;AT1G32230.1	2
ADAAPTVSIFPPSSEQLTSGGASVVCFLNNFYPK	CON__P01837	3
ADVEPEVAAAGVPK	AT1G04270.2;AT5G09510.1;AT1G04270.1	4
AEAESLYQSK	CON__P04264	5
AEAESLYQSKYEELQITAGR	CON__P04264	6
AEDASDALSWVAR	AT5G16780.1	7
AELALLR	AT5G02610.1;AT2G39390.1;AT5G02610.2;AT3G09500.1	8
AETECQNTEYQQLLDIK	CON__P13645	9
AEVDISHSK	AT3G57150.1	10
AEVKFEGDTLVNR	CON__PSB_N_GS_yellow|?leader-YFP-3C2-TEV2-SBP;CON__PSB_N_GS_green|eGFP-3C2-TEV2-eGFP;CON__PSB_C_GS_green|SBP-3C2-TEV2-eGFP;CON__PSB_C_GS_yellow|SBP-3C2-TEV2-citrineYFP;CON__P42212;CON__PSB_N_GFP|eGFP;CON__PSB_C_GFP|eGFP;CON__Q9U6Y5	11
AFMEMNMILEAMK	AT2G22690.2;AT2G22690.1	12
AGALGDSVSITR	AT5G27770.1	13
AGALGDSVTITR	AT3G05560.3;AT3G05560.2;AT3G05560.1	14
AGVKEYK	ATCG00490.1	15
AIGGGLSSVGGGSSTIK	CON__P48668;CON__P02538	16
AIVVNVPYR	AT1G48830.2;AT1G48830.1	17
ALAALRLEDLR	ATCG00490.1	18
ALEEANADLEVK	CON__P02533;CON__P19012;CON__Q6IFX2;CON__ENSEMBL:ENSP00000377550;CON__P13646-1;CON__P08779	19
ALEEANTELEVK	CON__Q04695;CON__Q9QWL7	20
ALEESNYELEGK	CON__P13645;CON__P02535-1	21
ALELSEQPVPDDLK	AT1G20920.1;AT1G20920.2	22
ALESLTGAVFQRPPLISAVK	AT3G57150.1	23
ALGSIGAGTTPGR	AT2G43030.1	24
ALSTSKPDPVVEDQA	AT2G41840.1	25
AMHAVIDR	ATCG00490.1	26
AMLEVDDQQQNVTSQR	AT1G31440.1	27
AMQLLESGLK	AT5G45775.1;AT5G45775.2;AT4G18730.1;AT3G58700.1;AT2G42740.1	28
APILSDSSCK	CON__P00760	29
APQVYTIPPPK	CON__P01868;CON__P01869	30
APQVYTIPPPKEQMAK	CON__P01868;CON__P01869	31
APSTYGGGLSVSSR	CON__P08779	32
APSTYGGGLSVSSSR	CON__P02533	33
AQFFSGGEEYDNGVDDIESPK	AT1G32230.2;AT1G32230.3;AT1G32230.1	34
AQGLEEDPR	AT3G15730.1	35
AQHLLHGTLHATIYEVDALHGGGVR	AT3G15730.1	36
AQLDAER	AT3G59800.1;AT2G43795.1;AT2G43795.2	37
AQYEEIANR	CON__P13647	38
AQYEEIAQR	CON__P35908;CON__P19013;CON__ENSEMBL:ENSBTAP00000038253;CON__P48668;CON__P02538;CON__P04259	39
ARFEELNIDLFR	AT3G09440.2;AT3G09440.1	40
ARFEELNMDLFR	AT5G02500.1;AT5G02500.2;AT3G12580.1	41
ARHEEEMALLAR	AT1G03910.1;AT1G03910.2	42
ARLEHHPQGQR	CON__PSB_N_GS_yellow|?leader-YFP-3C2-TEV2-SBP;CON__PSB_N_GS_green|eGFP-3C2-TEV2-eGFP;CON__PSB_C_GS_green|SBP-3C2-TEV2-eGFP;CON__PSB_C_GS_yellow|SBP-3C2-TEV2-citrineYFP;CON__PSB_C_SBP-HA|G4S-SBP-HA;CON__PSB_C_SBP-Stag|G4S-SBP-Stag;CON__PSB_N_GS_TEV|ProtG2-TEV2-SBP;CON__PSB_N_GS_rhino|?leader-ProtG2-3C2-SBP;CON__PSB_C_GS_TEV|SBP-TEV2-ProtG2;CON__PSB_C_GS_rhino|SBP-3C2-ProtG2;CON__PSB_C_UBA-GS_rhino…	43
ATAGDTHLGGEDFDNR	AT5G02500.1;AT5G02500.2;AT3G12580.1;AT3G09440.2;AT3G09440.1	44
ATIPVNPKPFLNNLTGK	AT4G30220.1	45
ATLAAVQQMR	AT2G33800.1	46
ATLTVDK	CON__P06328;CON__P01754;CON__P06329;CON__P01751;CON__P01757;CON__P01756;CON__P01750;CON__P01749;CON__P06330;CON__P03980	47
AVVIYVPFR	AT3G02560.2;AT3G02560.1;AT5G16130.1	48
AYIPVDQVINGEEVDQWVEILDNDRNPIQGGSK	AT3G15730.1	49
CFFPEIYESDER	AT1G32230.2;AT1G32230.3;AT1G32230.1	50
CGLTYVYQK	AT2G47110.2;AT2G47110.1;AT3G62250.1	51
CRVNSAAFPAPIEK	CON__P01868;CON__P01869	52
DAEAWFNEK	CON__P13645;CON__Q7Z3Z0;CON__Q7Z3Y8;CON__Q148H6;CON__Q7Z3Y7	53
DAGVIAGLNVMR	AT5G02500.1;AT5G02500.2;AT3G09440.2;AT3G09440.1	54
DCGCKPCICTVPEVSSVFIFPPKPK	CON__P01868;CON__P01869	55
DDENVNSQPFMR	ATCG00490.1;ATMG00280.1;AT2G07732.1	56
DDNPIGATLIGR	AT3G15730.1	57
DDPEVQFSWFVDDVEVHTAQTQPR	CON__P01868;CON__P01869	58
DDYVEKDR	ATCG00490.1	59
DETPFSHGQGLYINPIQFK	AT3G15356.1	60
DEYERHNSYTCEATHK	CON__P01837	61
DGEIEDQLDSKPK	AT4G36690.4;AT4G36690.1;AT4G36690.2;AT4G36690.3	62
DGLMATHDEETENFFR	AT3G15730.1;AT1G52570.1	63
DGSFAVVASLFK	AT3G52720.2;AT3G52720.1	64
DIENQYETQITQIEHEVSSSGQEVQSSAK	CON__P35527	65
DINVKWK	CON__P01837;CON__Q05B55	66
DINVKWKIDGSER	CON__P01837	67
DITQLVEVRPESDR	AT1G20920.1;AT1G20920.2	68
DKKEEVIEEVASPK	AT3G57150.1	69
DLAVEGNEIIR	ATCG00490.1	70
DLPPQLESNGAR	AT1G32230.2;AT1G32230.3	71
DLVLGQGALIPLLSQLNEHAK	AT4G16143.2;AT4G16143.1	72
DNGLLLHIHR	ATCG00490.1	73
DNSGVTLEGPK	AT1G32230.2;AT1G32230.3;AT1G32230.1	74
DNSGVTLEGPKDLPPQLESNGAR	AT1G32230.2;AT1G32230.3	75
DSAVNAICYGAK	AT3G57150.1	76
DSCQGDSGGPVVCSGK	CON__P00760	77
DSEIAMGGYQPHHLSHR	AT3G15730.1	78
DSTYSMSSTLTLTK	CON__P01837	79
DSTYSMSSTLTLTKDEYER	CON__P01837	80
DTDILAAFR	ATCG00490.1	81
DVDGAYMTK	CON__P04264	82
DVIFVATR	AT3G02560.2;AT3G02560.1	83
DVILIATR	AT1G48830.2;AT1G48830.1	84
DVIQALR	AT3G15730.1	85
DVLTITLTPK	CON__P01868;CON__P01869	86
DVTLLPLSPK		87
DVVFEFPITEA	AT1G48830.2;AT1G48830.1	88
DVYEFFSR	AT2G16940.1;AT2G16940.3;AT2G16940.2	89
DYQELMNTK	CON__P04264;CON__ENSEMBL:ENSBTAP00000038253	90
DYQELMNVK	CON__P35908	91
DYSEEKVTEYMSK	AT1G03910.1;AT1G03910.2	92
EAAWAISNATSGGSPDQIK	AT4G16143.2;AT4G16143.1	93
EASALDLQNR	AT5G16780.1	94
EEQFNSTFR	CON__P01868;CON__P01869;CON__P01859	95
EFAAEEISSMVLIK	AT5G02500.1;AT5G02500.2	96
EFLNGDLIAK	AT1G31330.1	97
EGIPELSMEDYFSK	AT1G79200.1	98
EHGNTPGYYDGR	AT5G38420.1;AT5G38410.1;AT5G38410.3;AT5G38430.1	99
EIAEAYLGVTIK	AT5G02500.1;AT5G02500.2	100
EIETYHNLLEGGQEDFESSGAGK	CON__P35527	101
EIIIDVPLASR	AT1G31330.1	102
EITFNFPTIDKLDGQE	ATCG00490.1	103
EKDLQIEKLNK	AT3G51150.1;AT3G51150.2	104
EKYPQVYTSDDK	AT1G05910.1	105
ELAEDGYSGVEVR	AT5G35530.1;AT3G53870.1;AT2G31610.1	106
ELESICNPIIAK	AT5G02500.1;AT5G02500.2;AT3G09440.2;AT3G09440.1	107
ELGFEVPMEEEIK	AT5G23080.2;AT5G23080.1	108
ELLESFGPLR	AT1G60900.1	109
ELTTEIDNNIEQISSYK	CON__P13645	110
EMLLEFPNVGNDLK	AT1G65280.1	111
EQAVWALGNVAGDSPR	AT4G16143.2;AT4G16143.1;AT3G06720.2;AT3G06720.1	112
EQVFSTYSDNQPGVLIQVYEGER	AT5G02500.1;AT3G09440.2;AT3G09440.1	113
ESTLGFVDLLR	ATCG00490.1	114
ESTLHLVLR	AT2G47110.2;AT2G47110.1;AT1G23410.1;AT3G62250.1;AT3G52590.1;AT2G36170.1;AT4G05050.4;AT2G35635.1;AT1G31340.1;AT4G05050.3;AT4G05050.2;AT4G05050.1;AT4G02890.2;AT4G02890.1;AT1G55060.1;AT4G05320.5;AT4G02890.4;AT4G02890.3;AT5G03240.3;AT5G03240.2;AT5G03240.1;AT1G65350.1;AT5G37640.1;AT4G05320.6;AT4G05320.3;AT4G05320.1;AT5G20620.1;AT4G05320.4;AT4G05320.2;AT3G09790.1;CON__P62979	115
ETLLGVLSEQVCEPIR	AT1G31440.1	116
EVATNSELVQSGK	CON__P02533;CON__Q04695;CON__Q9QWL7	117
EVELTKEESGFLR	AT1G05190.1	118
EVLSAVMMQGLGVGGAFIR	AT1G32230.2;AT1G32230.3;AT1G32230.1	119
EYPNAFIR	AT1G67090.1	120
FAEDFKK	AT1G31440.1	121
FASFIDKVR	CON__P35908;CON__Q9R0H5;CON__Q6NXH9;CON__Q7Z794;CON__Q14CN4-1;CON__Q6IME9;CON__Q3SY84;CON__Q7RTS7;CON__Q32MB2;CON__P13647;CON__Q8VED5;CON__P05787;CON__P07744;CON__Q9DCV7;CON__Q3KNV1;CON__P08729;CON__Q9NSB2;CON__Q6ISB0;CON__P48668;CON__P02538;CON__P04259;CON__O95678	122
FASFINKVR	CON__Q9NSB4	123
FDNTSEALEAVAK	AT3G05060.1	124
FEELNMDLFR	AT5G02500.1;AT5G02500.2;AT3G12580.1	125
FEGDTLVNR	CON__PSB_N_GS_yellow|?leader-YFP-3C2-TEV2-SBP;CON__PSB_N_GS_green|eGFP-3C2-TEV2-eGFP;CON__PSB_C_GS_green|SBP-3C2-TEV2-eGFP;CON__PSB_C_GS_yellow|SBP-3C2-TEV2-citrineYFP;CON__P42212;CON__PSB_N_GFP|eGFP;CON__PSB_C_GFP|eGFP;CON__Q9U6Y5	126
FELEDLLRASAEMLGK	AT1G68400.1	127
FGALTNVVIPR	AT4G36690.4;AT4G36690.1	128
FGALTNVVIPRPSPNGEPVAGLGK	AT4G36690.4;AT4G36690.1	129
FGEAVWFK	AT2G34420.1;AT2G05100.1;AT2G05070.1;AT3G27690.1;AT2G34430.1;AT1G29930.1;AT1G29920.1;AT1G29910.1	130
FGGFGGPGGVGGLGGPGGFGPGGYPGGIHEVSVNQSLLQPLNVK	CON__P35908	131
FGIVEGLMTTVHSITATQK	AT3G04120.1;AT1G13440.1	132
FKLSNLPNAEGNLIAK	AT1G32230.2;AT1G32230.3;AT1G32230.1	133
FLEQQNK	CON__P13647;CON__Q8VED5;CON__P05787;CON__P07744;CON__Q9DCV7;CON__Q3KNV1;CON__P08729;CON__Q9NSB2;CON__Q6ISB0;CON__H-INV:HIT000292931;CON__Q61726;CON__O43790;CON__P15241;CON__Q6NT21;CON__P78385;CON__P25691;CON__Q14533;CON__P78386;CON__Q8N1N4-2;CON__Q7RTT2;CON__P48668;CON__P02538;CON__P04259;CON__O95678	134
FLEQQNQVLQTK	CON__P35908;CON__Q9R0H5;CON__Q6NXH9;CON__Q7Z794;CON__P04264;CON__ENSEMBL:ENSBTAP00000038253	135
FLFCAEAIYK	ATCG00490.1	136
FMIYVHTK	AT3G15730.1;AT1G52570.1	137
FNLKYNQAGKHTYVR	AT1G26680.1	138
FPGVPYTFFSQR	AT3G15730.1;AT1G52570.1	139
FSDSSVQSDMK	AT5G02500.1;AT5G02500.2	140
FSGEIPSFIGNLTQLVK	AT3G47090.1	141
FSGKDVILIATR	AT1G48830.2;AT1G48830.1	142
FSLGLAEPK	AT1G56110.1	143
FSSCGGGGGSFGAGGGFGSR	CON__P04264	144
FSSEIAEAR	AT1G32230.2;AT1G32230.3;AT1G32230.1	145
FSVSGEGEGDATYGK	CON__PSB_N_GS_yellow|?leader-YFP-3C2-TEV2-SBP;CON__PSB_N_GS_green|eGFP-3C2-TEV2-eGFP;CON__PSB_C_GS_green|SBP-3C2-TEV2-eGFP;CON__PSB_C_GS_yellow|SBP-3C2-TEV2-citrineYFP;CON__P42212;CON__PSB_N_GFP|eGFP;CON__PSB_C_GFP|eGFP;CON__Q9U6Y5	146
FTDSSVQSDIK	AT3G09440.2;AT3G09440.1	147
FVTAVVGFGK	AT5G56670.1;AT4G29390.1;AT2G19750.1	148
FVTAVVGFGKK	AT5G56670.1;AT4G29390.1;AT2G19750.1	149
FVYAHFPINASIGGDGK	AT1G33140.1;AT1G33120.1	150
GDKAQFFSGGEEYDNGVDDIESPK	AT1G32230.2;AT1G32230.3;AT1G32230.1	151
GDLTAEELAK	AT5G08180.2;AT5G08180.1	152
GDNITLMMNTGK	AT2G18740.1	153
GEELFTGVVPILVELDGDVNGHK	CON__PSB_N_GS_yellow|?leader-YFP-3C2-TEV2-SBP;CON__PSB_N_GS_green|eGFP-3C2-TEV2-eGFP;CON__PSB_C_GS_green|SBP-3C2-TEV2-eGFP;CON__PSB_C_GS_yellow|SBP-3C2-TEV2-citrineYFP;CON__P42212;CON__PSB_N_GFP|eGFP;CON__PSB_C_GFP|eGFP;CON__Q9U6Y5	154
GETQLYATIDLQK	AT3G15730.1	155
GFGFVQFAR	AT2G16940.1;AT2G16940.3;AT2G16940.2	156
GFSSGSAVVSGGSR	CON__P35908	157
GFVHGDVKPENFLLGQPGTADEK	AT3G03940.1	158
GGFGQVFVGR	AT3G13670.1	159
GGFGQVYVGR	AT3G03940.1;AT2G25760.1;AT2G25760.2	160
GGGGGGYGSGGSSYGSGGGSYGSGGGGGGGR	CON__P04264	161
GGHVVEGLAGELEQLR	CON__PSB_N_GS_yellow|?leader-YFP-3C2-TEV2-SBP;CON__PSB_N_GS_green|eGFP-3C2-TEV2-eGFP;CON__PSB_C_GS_green|SBP-3C2-TEV2-eGFP;CON__PSB_C_GS_yellow|SBP-3C2-TEV2-citrineYFP;CON__PSB_C_SBP-HA|G4S-SBP-HA;CON__PSB_C_SBP-Stag|G4S-SBP-Stag;CON__PSB_N_GS_TEV|ProtG2-TEV2-SBP;CON__PSB_N_GS_rhino|?leader-ProtG2-3C2-SBP;CON__PSB_C_GS_TEV|SBP-TEV2-ProtG2;CON__PSB_C_GS_rhino|SBP-3C2-ProtG2;CON__PSB_C_UBA-GS_rhino…	162
GGLDFTK	ATCG00490.1	163
GGLDFTKDDENVNSQPFMR	ATCG00490.1	164
GGPREPWHDIHSR	AT3G15730.1	165
GGSGGGGSISGGGYGSGGGSGGR	CON__P35908	166
GGSGGSHGGGSGFGGESGGSYGGGEEASGSGGGYGGGSGK	CON__P35527	167
GGSGGSYGGGGSGGGYGGGSGSR	CON__P35527	168
GGSISGGGYGSGGGK	CON__P35908	169
GHYLNATAGTCEEMIK	ATCG00490.1;ATMG00280.1	170
GHYLNATAGTCEEMIKR	ATCG00490.1;ATMG00280.1	171
GIDFKEDGNILGHK	CON__PSB_N_GS_yellow|?leader-YFP-3C2-TEV2-SBP;CON__PSB_N_GS_green|eGFP-3C2-TEV2-eGFP;CON__PSB_C_GS_green|SBP-3C2-TEV2-eGFP;CON__PSB_C_GS_yellow|SBP-3C2-TEV2-citrineYFP;CON__P42212;CON__PSB_N_GFP|eGFP;CON__PSB_C_GFP|eGFP;CON__Q9U6Y5	172
GKVHGSLAR	AT5G56670.1;AT4G29390.1;AT2G19750.1	173
GLADENGLGSNSADDVTGPK	AT1G65280.1	174
GLAYDTSDDQQDITR	AT2G39730.3;AT2G39730.2;AT2G39730.1	175
GLEGFIATGTK	AT1G31440.1	176
GLNEGGDNVDAASSGK	AT5G16780.1	177
GNSIVTVEALEPVGR	AT2G23930.2;AT3G11500.1;AT2G23930.1	178
GPAAIQK	CON__P35527	179
GRLPWQGYQGDNK	AT3G13670.1;AT3G03940.1	180
GRPKAPQVYTIPPPK	CON__P01868;CON__P01869	181
GSGGLGGACGGAGFGSR	CON__P48668;CON__P02538;CON__P04259	182
GSLGGGFSSGGFSGGSFSR	CON__P13645	183
GSNIIILDSYTDSAK	AT5G23060.1	184
GSSSGGGYSSGSSSYGSGGR	CON__P35908	185
GSTAEDLGAGNADAVWVHGLGYAK	AT3G52220.1	186
GVLTGEDAR	AT3G14420.4;AT3G14420.5;AT3G14420.6;AT3G14420.2;AT3G14420.1;AT3G14415.3;AT3G14415.1;AT3G14415.2	187
HDIWSWSFENAAK	AT3G16530.1	188
HGGGGGGFGGGGFGSR	CON__P35908	189
HGVQELEIELQSQLSK	CON__P35527	190
HGVQELEIELQSQLSKK	CON__P35527	191
HLVNHYDR	AT1G31440.1	192
HMLPDSLENMYPK	AT1G37020.1	193
HNSYTCEATHK	CON__P01837	194
HNSYTCEATHKTSTSPIVK	CON__P01837	195
HQDNNYGGFQRQR	AT3G62330.1	196
HQNHHNNTPQFATSPNCCNK	AT3G29310.1	197
IAAEVPGR	AT2G37630.1	198
IACYVTVR	AT5G45775.1;AT5G45775.2;AT4G18730.1;AT3G58700.1;AT2G42740.1	199
IALTDNSIVDQALGK	AT2G44120.1;AT2G44120.2	200
IAQIPVSEAYLGR	ATCG00120.1	201
IDGSERQNGVLNSWTDQDSK	CON__P01837	202
IEISELNR	CON__P35908;CON__P04264	203
IFEEQDNLNQGENEDGEDGEHLSGVK	AT5G16780.1	204
IFLENVIR	AT1G07660.2;AT5G59970.1;AT5G59690.1;AT3G53730.1;AT3G46320.1;AT3G45930.1;AT2G28740.1;AT1G07820.2;AT1G07820.1;AT1G07660.1	205
IFVGGLPYYFTESQVR	AT4G36690.4;AT4G36690.1;AT4G36690.2;AT4G36690.3	206
IFVGGLPYYFTEVQIR	AT1G60900.1	207
IGADAIEVALK	AT3G03940.1	208
IGDALHIGGGNK	AT1G54410.1	209
IGDMEGAAAIQR	AT5G53800.1	210
IGEKLPAADKK	AT5G02500.1;AT5G02500.2	211
IINEPTAAAIAYGLDK	AT5G02500.1;AT5G02500.2;AT3G12580.1;AT3G09440.2;AT3G09440.1	212
IINEPTAAAIAYGLDKK	AT5G02500.1;AT5G02500.2;AT3G12580.1;AT3G09440.2;AT3G09440.1	213
IKFEMEQNLR	CON__P35527	214
IKIDIDESLFSN	AT2G38140.1	215
ILANVEETIGVGK	AT3G15730.1	216
ILLKGDNITLMMNTGK	AT2G18740.1	217
ILSLLPFLNNQK	ATCG00650.1	218
ILVFVQSQEK	AT1G20920.1;AT1G20920.2	219
IMEADANSPYDVLGVNHNMAADNMK	AT1G65280.1	220
IMEIASLEK	AT3G05560.3;AT3G05560.2;AT3G05560.1;AT5G27770.1	221
IMTQPINLIFR	AT2G18740.1;AT2G18740.2;AT4G30330.1	222
IPHFNAPIYLENK	AT3G03920.1	223
IQDWYDK	CON__P35527	224
IQDWYDKK	CON__P35527	225
IQIWLFEQK	AT2G18740.1;AT2G18740.2;AT4G30330.1	226
IRLENEIQTYR	CON__P13645	227
ISDKYWDFYSSESLEHDLPGHLLR	AT3G15730.1	228
ISISTSGGSFR	CON__P13647	229
ISSVLAGGSCR	CON__P02533;CON__P08779	230
ISVLNDALK	AT5G59850.1;AT1G07770.2;AT1G07770.1	231
ITVSGYDKSEIGQFAATVR	AT1G05190.1	232
ITVTADGQFSK	AT3G05560.3;AT3G05560.2;AT3G05560.1;AT5G27770.1	233
IVLEMAGVENALGK	AT2G33800.1	234
IVVELNGR	AT5G59850.1;AT1G07770.2;AT1G07770.1;AT3G46040.1;AT2G39590.1	235
IVVVDSEMPSR	AT3G15730.1	236
KAEAETEAVVEVAKEEK	AT3G05060.1	237
KCTVFPFHPQEAKEER	AT5G37500.1	238
KDALTALFNLSLNSANK	AT5G42340.1	239
KDGEYEPAEKPDPDTDYMR	AT3G15730.1	240
KDGLMATHDEETENFFR	AT3G15730.1;AT1G52570.1	241
KFETLSYLPDLSDVELAK	AT5G38420.1;AT5G38410.1;AT5G38410.3;AT5G38410.2	242
KFETLSYLPDLTDSELAK	AT1G67090.1;AT1G67090.2	243
KGELEADTDKLMR	AT3G59800.1	244
KGPAAIQK	CON__P35527	245
KLDEEVEK	AT1G20920.1	246
KLDEEVEKR	AT1G20920.1	247
KLEAAVSKWDETDAIVVSGAK	AT1G32230.2;AT1G32230.3;AT1G32230.1	248
KLEWYEK	AT5G66470.1	249
KLNAMNKLLMEENDR	AT2G34710.1	250
KLQEEEAAEEAAEAAK	AT5G65220.1	251
KLQFVNLQYK	AT2G33450.1	252
KMFAVGTASLGHVPVLDVGR	AT1G32230.2;AT1G32230.3;AT1G32230.1	253
KQFVIDVLHPGR	AT5G28060.1;AT3G04920.1	254
KSIYGVGIHLTAADCPYFSAR	AT1G32230.2;AT1G32230.3;AT1G32230.1	255
KVEEEKPEEEEPSEK	AT3G05060.1	256
KVFESFGSVELVQVPR	AT2G16940.1;AT2G16940.3;AT2G16940.2	257
KVLNKPVEIQVGGR	AT1G20920.1;AT1G20920.2;AT3G09620.1	258
KVLQFAGIDDVFTSSR	AT2G41840.1;AT3G57490.1;AT1G59359.1;AT1G58983.1;AT1G58684.1;AT1G58380.1	259
KYEDEINKR	CON__P35908;CON__ENSEMBL:ENSBTAP00000038253	260
LADLVGVTLGPK	AT3G13470.1;AT5G56500.2;AT5G56500.1;AT1G55490.2;AT1G55490.1	261
LALDLEIATYR	CON__P04264	262
LALDVEIATYR	CON__P35908;CON__REFSEQ:XP_932229;CON__P13647;CON__P07744;CON__ENSEMBL:ENSBTAP00000038253;CON__P48668;CON__P02538;CON__P04259;CON__O95678	263
LASYLDKVQALEEANNDLENK	CON__P35527	264
LASYLDKVR	CON__P13645;CON__P08730-1;CON__Q99456;CON__P02533;CON__P19012;CON__A2A4G1;CON__P08727;CON__P19001;CON__Q04695;CON__Q9QWL7;CON__P08779	265
LAVLQFYK	AT2G47110.2;AT2G47110.1;AT1G23410.1;AT3G62250.1	266
LAVLQFYKVDGSGK	AT2G47110.2;AT2G47110.1;AT1G23410.1	267
LCGHSFILDFLHMQR	AT1G32230.2;AT1G32230.3;AT1G32230.1	268
LDEVGAIR	AT5G12230.1	269
LEGDRESTLGFVDLLR	ATCG00490.1	270
LEGPIAWDVMYNFEQR	AT3G15730.1	271
LEIDVNGGETPR	AT1G32230.2;AT1G32230.3;AT1G32230.1	272
LENEIQTYR	CON__P13645;CON__P02535-1	273
LFLEAVTNMK	AT3G03940.1	274
LFLVDLGLATK	AT3G13670.1	275
LGEDNINVVEGNEQFISASK	CON__P00760	276
LHSEMIAEEEAIGSSPK	AT1G31440.1	277
LIAGDFLESLGK	AT5G23080.2;AT5G23080.1	278
LIESPAPGIISR	ATCG00120.1	279
LILVGVGYR	AT1G05190.1	280
LISHGGSLLNLSK	AT3G05060.1	281
LKEEMVYLYK	AT5G53800.1	282
LKESDISEEAYIK	AT1G31440.1	283
LKSAASLNSR	CON__P00760	284
LKTDYEQVSDDIK	AT5G08180.2;AT5G08180.1	285
LKYENEVALR	CON__P13645	286
LLEGEDAHLSSSQFSSGSQSSR	CON__P02533;CON__Q61782	287
LLELLGEWSEK	AT1G20920.1;AT1G20920.2	288
LLINLEEDEQPR	AT3G03940.1	289
LMFQPGGTPTK	AT1G60900.1	290
LNDLEDALQQAK	CON__P04264	291
LPLFGCTDSAQVLK	AT5G38420.1;AT5G38410.1;AT5G38410.3;AT5G38410.2;AT5G38430.1;AT1G67090.1	292
LQDLYSSTK	AT1G31440.1	293
LQEEEAAEEAAEAAK	AT5G65220.1	294
LQELNRILR	AT5G59200.1	295
LQGIVSWGSGCAQK	CON__P00760	296
LQSPIDIQR	AT3G52720.2;AT3G52720.1	297
LQYFHVEEDRNWNMGIK	AT3G15730.1	298
LRDLSDIIITPSPVMFQEDHDVWNVQLFR	AT3G15730.1	299
LRLEIDVNGGETPR	AT1G32230.2;AT1G32230.3;AT1G32230.1	300
LRQEVEAQATDVLR	AT1G31440.1	301
LRSEIDNVKK	CON__P04264	302
LSAYENR	AT1G32230.2;AT1G32230.3;AT1G32230.1	303
LSGGDHIHAGTVVGK	ATCG00490.1	304
LSGVMDDRGKYIYISMEEMNAVADYIK	AT4G27120.2;AT4G27120.1	305
LSIGEEEEDAPR	AT3G13670.1	306
LSNLPNAEGNLIAK	AT1G32230.2;AT1G32230.3;AT1G32230.1	307
LTEAQAELR	AT1G65280.1	308
LTGSEVLDKDAVK	AT1G32230.2;AT1G32230.3;AT1G32230.1	309
LTGSEVLDKDAVKK	AT1G32230.2;AT1G32230.3;AT1G32230.1	310
LTYYTPEYETK	ATCG00490.1	311
LVDETQETLR	AT3G13670.1	312
LVELLQHQSPSVLIPALR	AT4G16143.2;AT4G16143.1	313
LVLNISVGESGDR	AT5G45775.1;AT5G45775.2;AT4G18730.1;AT3G58700.1;AT2G42740.1	314
MAFFDPSRPQDFLFISGTK	AT3G22890.1	315
MAIMEMKAVKGK	AT5G20310.1	316
MDKNSIDDVVLVGGSTR	AT3G09440.2;AT3G09440.1	317
MDKSTVHDVVLVGGSTR	AT5G02500.1;AT5G02500.2	318
MDPEELPGQSMLK	AT1G34190.1	319
MFAVGTASLGHVPVLDVGR	AT1G32230.2;AT1G32230.3;AT1G32230.1	320
MFDMGFEPQITR	AT1G20920.1;AT1G20920.2;AT3G09620.1	321
MHNIMLDEQYNAK	AT5G11400.1	322
MIDDGQAVDIK	AT1G65280.1	323
MLISWTSQNVK	AT2G01730.1	324
MSDQGNLWR	AT5G58510.1	325
MSGECAPNVSVSVSTSHTTISGGGSR	CON__P04264	326
MTLDDFR	CON__P35527	327
MTNVMSFLVDEEK	AT3G17570.1	328
MVNHFVQEFK	AT5G02500.1;AT5G02500.2;AT3G12580.1;AT3G09440.2;AT3G09440.1	329
NALDILDKLHSEMIAEEEAIGSSPK	AT1G31440.1	330
NATWTLSNFCR	AT4G16143.2;AT4G16143.1;AT3G06720.2;AT3G06720.1;AT4G02150.1;AT1G02690.1;AT1G02690.2;AT1G09270.3;AT1G09270.2;AT1G09270.1	331
NFLTLPNIK	AT2G39730.3;AT2G39730.2;AT2G39730.1	332
NFYIEVK	AT1G20920.1;AT1G20920.2;AT3G09620.1	333
NKLNDLEDALQQAK	CON__P04264	334
NKLNDLEDALQQAKEDLAR	CON__P04264	335
NKLNDLEEALQQAK	CON__P35908	336
NKLNDLEEALQQAKEDLAR	CON__P35908	337
NKPGVYTK	CON__P00760;CON__P00761;CON__P07477	338
NKYEDEINKR	CON__P04264;CON__H-INV:HIT000016045;CON__P13647;CON__Q8VED5;CON__P05787;CON__P48668;CON__P02538;CON__P04259	339
NLDLDSIIAEVK	CON__P35908;CON__P13647;CON__Q8VED5;CON__P48668;CON__P02538;CON__P04259;CON__O95678	340
NMQDMVEDYR	CON__P04264	341
NNAGYPHNVVFDEDEIPSGVDVAK	AT1G20340.1	342
NNEFATWLK	AT1G79200.1	343
NPDDGGSIVQSLQISTMFTHHQK	AT3G15730.1	344
NQILNLTTDNANILLQIDNAR	CON__P13645	345
NQVAMNPINTVFDAK	AT3G09440.2;AT3G09440.1	346
NQVAMNPVNTVFDAK	AT5G02500.1;AT5G02500.2	347
NSKIEISELNR	CON__P04264	348
NTKHEISEMNRMIQR	CON__P13647	349
NTKVEISELNR	CON__ENSEMBL:ENSBTAP00000038253	350
NTQPIMNTNGSYFVYSK	CON__P01868;CON__P01869	351
NTQPIMNTNGSYFVYSKLNVQK	CON__P01868;CON__P01869	352
NVDFNASQTYRTR	AT4G25940.1	353
NVQALEIELQSQLALK	CON__P13645	354
NVQDAIADAEQR	CON__P35908	355
NVSTGDVNVEMNAAPGVDLTQLLNNMR	CON__P13645	356
NYIVWNINMNTHIFPEFVVR	AT1G32230.2;AT1G32230.3;AT1G32230.1	357
NYLTFFCLGNR	AT3G15730.1	358
NYSPYYNTIDDLKDQIVDLTVGNNK	CON__P35527	359
PFAQMFQK	AT2G31660.1	360
PFVQDNVSYSDNVFSK	AT2G25640.1	361
PGGDVTIGELLK	AT3G15730.1	362
PGPVGSGSDFGR	AT3G29075.1	363
PKDVLTITLTPK	CON__P01868;CON__P01869	364
PNFSSNHDSSAYDDQALK	AT3G29075.1	365
PSNVIPK	AT5G19750.1	366
QEFPSHEPQFDSK	AT1G45160.1;AT1G45160.2	367
QEVEAQATDVLR	AT1G31440.1	368
QEYEQLIAK	CON__P35527	369
QGVDADINGLR	CON__P35527	370
QHPNSLSMKDFDK	AT4G03340.1	371
QISNLQQSISDAEQR	CON__P04264	372
QIVLTQSPAIMSASPGQK	CON__P04943;CON__P04942;CON__P04940	373
QNGVLNSWTDQDSK	CON__P01837	374
QNGVLNSWTDQDSKDSTYSMSSTLTLTKDEYER	CON__P01837	375
QQNRAEEAIDAIQSFR	AT1G04770.1	376
QSLEASLAETEGR	CON__P13645;CON__P02535-1	377
QSQPASNLVSQVKNEPR	AT3G12980.1	378
QVAGTGWSEGEYK	AT1G31440.1	379
QVLDNLTMEK	CON__P35527	380
RADAAPTVSIFPPS	CON__P84750	381
RDNSGVTLEGPK	AT1G32230.2;AT1G32230.3;AT1G32230.1	382
RFMIYVHTK	AT3G15730.1;AT1G52570.1	383
RFVTAVVGFGK	AT5G56670.1;AT4G29390.1;AT2G19750.1	384
RIQKGPVR	AT3G10610.1;AT2G05220.2;AT2G05220.1;AT5G04800.4;AT5G04800.3;AT5G04800.2;AT5G04800.1;AT2G04390.1	385
RLEMQELR	AT5G53800.1	386
RPKPGGDVTIGELLK	AT3G15730.1	387
RPLQEYIR	AT3G57150.1	388
RPSDYNPSLAATLGPSQPSPHLNLAAVGLTPGASGGLEGPDR	AT4G36690.4;AT4G36690.1;AT4G36690.2;AT4G36690.3	389
RTYFNDLTTEAAR	AT1G79200.1	390
RVLDELTLTK	CON__P13645	391
RWIYDTSK	CON__P04943;CON__P04942;CON__P04940;CON__P04944;CON__P04941	392
SAAIEFK	AT1G32230.2;AT1G32230.3;AT1G32230.1	393
SAGASILEVALK	AT3G13670.1	394
SAMPEGYVQER	CON__PSB_N_GS_yellow|?leader-YFP-3C2-TEV2-SBP;CON__PSB_N_GS_green|eGFP-3C2-TEV2-eGFP;CON__PSB_C_GS_green|SBP-3C2-TEV2-eGFP;CON__PSB_C_GS_yellow|SBP-3C2-TEV2-citrineYFP;CON__P42212;CON__PSB_N_GFP|eGFP;CON__PSB_C_GFP|eGFP;CON__Q9U6Y5	395
SAYPGQITSNMFCAGYLEGGK	CON__P00760	396
SDLEMQYETLQEELMALKK	CON__P35527	397
SDLQNQLK	AT3G09500.1	398
SDYDNVIGALPYLK	AT2G24090.1	399
SEDLDVVEEEADLKK	AT1G20920.1	400
SEIGQFAATVR	AT1G05190.1	401
SFLELNLPK	AT1G56110.1;AT3G12860.1	402
SGAEVLK	AT2G22600.1	403
SGGGFSSGSAGIINYQR	CON__P04264	404
SGGGGGGGLGSGGSIR	CON__P35527	405
SGPDGWIPNTVK	AT5G62200.1	406
SIAQVLTVISQK	AT5G02610.1;AT2G39390.1;AT5G02610.2	407
SIDGGAAAGFPESPEAAAEAGLVSGK	AT3G15730.1	408
SIDGGAAAGFPESPEAAAEAGLVSGKDNIIDR	AT3G15730.1	409
SIITGELPAGWEK	AT3G60750.2;AT3G60750.1	410
SINPDEAVAYGAAVQGAILSGEGNEK	AT5G02500.1;AT5G02500.2	411
SIQDAYIHAIR	AT3G15730.1;AT1G52570.1	412
SIVHPSYNSNTLNNDIMLIK	CON__P00760	413
SIYGVGIHLTAADCPYFSAR	AT1G32230.2;AT1G32230.3;AT1G32230.1	414
SKAEAESLYQSK	CON__P04264	415
SKAEAESLYQSKYEELQITAGR	CON__P04264	416
SKATLTVDK	CON__P06328;CON__P01754;CON__P06329;CON__P01751	417
SKEEAEALYHSK	CON__P35908	418
SKEEAEALYHSKYEELQVTVGR	CON__P35908	419
SKEIPGSIR	AT1G32230.2;AT1G32230.1	420
SKELTTEIDNNIEQISSYK	CON__P13645	421
SKTTEQLQEEVVDLK	AT5G65220.1	422
SLDLDSIIAEVK	CON__P04264	423
SLLEGEGSSGGGGR	CON__P13645	424
SLNNQFASFIDK	CON__P04264;CON__ENSEMBL:ENSBTAP00000038253	425
SLNNQFASFIDKVR	CON__P04264;CON__ENSEMBL:ENSBTAP00000038253	426
SLPLHIEDSASLPQQEPNSNSSGEIK	AT1G31440.1	427
SLQLEATTQFR	AT4G16143.2;AT4G16143.1	428
SLRPNAK	AT4G16143.2;AT4G16143.1;AT3G06720.2;AT3G06720.1	429
SLVANEEFQHILR	AT4G09800.1;AT1G34030.1;AT1G22780.1	430
SMQEAAQWR	AT1G65280.1	431
SNPQEVTKPSPK	AT1G31440.1	432
SNWEAGNTFTCSVLHEGLHNHHTEK	CON__P01868;CON__P01869	433
SPPIEEVIDAGVVPR	AT4G16143.2;AT4G16143.1	434
SPWMPFPTLFAAISHK	AT1G32230.2;AT1G32230.3;AT1G32230.1	435
SPYQEHTDFLASK	AT2G41840.1	436
SQYEQLAEQNR	CON__P13645	437
SQYEQLAEQNRK	CON__P13645	438
SRDEDTEKEISR	AT5G16780.1	439
SRTEAESWYQTK	CON__P13647	440
SSGTSYPDVLK	CON__P00760	441
SSNEHYDEATEDSCSR	AT1G32230.2;AT1G32230.3;AT1G32230.1	442
SSSSMRK	AT3G09070.1	443
STITTLQNQPK	AT1G32230.2;AT1G32230.1	444
STMQELNSR	CON__P35527	445
STSSFSCLSR	CON__P35908	446
STVHDVVLVGGSTR	AT5G02500.1;AT5G02500.2	447
SVEEASNAMSLDGIIFEGAPVK	AT4G36690.4;AT4G36690.1;AT4G36690.2;AT4G36690.3	448
SVEGERETLLGVLSEQVCEPIR	AT1G31440.1	449
SVSELPIMHQDWLNGK	CON__P01868;CON__P01869	450
SVSELPIMHQDWLNGKEFK	CON__P01868;CON__P01869	451
SYADPNSILKKVDESR	AT3G32410.1;AT2G25050.1;AT2G25050.2	452
TAALGQHDEAMDEK	CON__PSB_N_GS_yellow|?leader-YFP-3C2-TEV2-SBP;CON__PSB_N_GS_green|eGFP-3C2-TEV2-eGFP	453
TAHDWMIK	AT1G79200.1	454
TEELNKEVASNSELVQSSR	CON__P08779	455
TEYSSYARPGPVGSGSDFGR	AT3G29075.1	456
TFAEEVNAAFR	AT1G12900.4;AT1G12900.3;AT3G26650.1;AT1G12900.1;AT1G12900.2	457
TFQGPPHGIQVER	ATCG00490.1	458
THESVTGVRTDER	AT5G60250.1	459
THNLEPYFESFINNLR	CON__P04264	460
TIFFKDDGNYK	CON__PSB_N_GS_yellow|?leader-YFP-3C2-TEV2-SBP;CON__PSB_N_GS_green|eGFP-3C2-TEV2-eGFP;CON__PSB_C_GS_green|SBP-3C2-TEV2-eGFP;CON__PSB_C_GS_yellow|SBP-3C2-TEV2-citrineYFP;CON__P42212;CON__PSB_N_GFP|eGFP;CON__PSB_C_GFP|eGFP;CON__Q9U6Y5	461
TITLEVESSDTIDNVK	AT2G47110.2;AT2G47110.1;AT1G23410.1;AT3G62250.1;AT3G52590.1;AT2G36170.1;AT4G05050.4;AT2G35635.1;AT1G31340.1;AT4G05050.3;AT4G05050.2;AT4G05050.1;AT4G02890.2;AT4G02890.1;AT1G55060.1;AT4G05320.5;AT4G02890.4;AT4G02890.3;AT5G03240.3;AT5G03240.2;AT5G03240.1;AT1G65350.1;AT5G37640.1;AT4G05320.6;AT4G05320.3;AT4G05320.1;AT5G20620.1;AT4G05320.4;AT4G05320.2;AT3G09790.1	462
TKEVEGEEAEEKVK	AT3G57150.1	463
TLDTVHHDDFHQPNFTGAAITK	AT3G15730.1	464
TLGFVLPMLR	AT1G20920.1;AT1G20920.2;AT3G09620.1	465
TLLDIDNTR	CON__P35527	466
TLLEGEESR	CON__P04264;CON__ENSEMBL:ENSBTAP00000038253	467
TLLFGEKPVTVFGIR	AT3G04120.1;AT1G13440.1;AT1G13440.2	468
TLNNDIMLIK	CON__P07477	469
TLQPLQHYWPIRDKDK	AT1G63420.1	470
TLTAEAESFLK	ATCG00120.1	471
TLTSVHEAILDDVVLPAEIVGK	AT1G48830.2;AT1G48830.1	472
TMIYSAPLEDAR	AT1G31440.1	473
TNAENEFVTIK	CON__P04264	474
TNAENEFVTIKK	CON__P04264	475
TNQNVIVSDRKPILGLK	AT1G78090.1	476
TPLAWIDNAGK	AT1G32230.2;AT1G32230.3;AT1G32230.1	477
TSQNSELNNMQDLVEDYKK	CON__P35908	478
TSSLTLGSEEEK	AT5G23080.2;AT5G23080.1	479
TSTSPIVK	CON__P01837	480
TSTSPIVKSFNR	CON__P01837	481
TSVDVLKK	AT3G15730.1	482
TTEQLQEEVVDLK	AT5G65220.1	483
TTPPSVYPLAPGSAAQTNSMVTLGCLVK	CON__P01868;CON__P01869	484
TTPSYVAFTDSER	AT5G02500.1;AT5G02500.2;AT3G12580.1;AT3G09440.2;AT3G09440.1	485
TVEDGPDDVER	AT3G52220.1	486
TVFAYQIALR	AT2G16940.1;AT2G16940.3;AT2G16940.2	487
TVFNDEEQR	AT5G53800.1	488
TYFNDLTTEAAR	AT1G79200.1	489
TYGFLTPEFWK	AT2G41840.1;AT3G57490.1;AT1G59359.1;AT1G58983.1;AT1G58684.1;AT1G58380.1	490
TYNTAADSLLGETSAK	AT3G05060.1	491
VAENDMLLINADYQQLR	AT1G32230.2;AT1G32230.3;AT1G32230.1	492
VAHHFGTSYK	AT1G31440.1	493
VAIGQVLLSVR	AT1G14320.1;AT1G66580.1;AT1G26910.1	494
VAINGFGR	AT1G12900.4;AT1G12900.3;AT3G26650.1;AT1G12900.1	495
VALEACVQAR	ATCG00490.1	496
VCNYVSWIK	CON__P00760	497
VDKKIVPR	CON__P01868;CON__P01869	498
VDLLNQEIEFLK	CON__P35908	499
VEIIANDQGNR	AT5G02500.1;AT5G02500.2;AT3G12580.1;AT3G09440.2;AT3G09440.1	500
VFLEYADVDGSSK	AT1G60900.1;AT1G60830.1	501
VFLLPPGASPSLDVVGHLIK	AT1G65280.1	502
VFQVVGDALKPALDTALPIAK	AT5G23060.1	503
VGKSGVVENLLSWADFK	AT3G23890.2;AT3G23890.1	504
VIAWYDNEWGYSQR	AT1G12900.4;AT1G12900.3;AT3G26650.1;AT1G12900.1;AT1G12900.2	505
VIEVEGPR	AT1G33140.1;AT1G33120.1;AT4G10450.1	506
VIMGNMELLR	AT1G32230.2;AT1G32230.3;AT1G32230.1	507
VINALANPIDGR	ATCG00120.1	508
VISIPLEELPNKVK	AT5G23060.1	509
VIVGDDLLR	AT1G32230.2;AT1G32230.3;AT1G32230.1	510
VLDELTLAR	CON__P02533;CON__P19012;CON__A2A4G1;CON__P08727;CON__P19001;CON__Q6IFX2;CON__Q04695;CON__Q9QWL7;CON__P08779	511
VLDELTLTK	CON__P13645	512
VLEQLSGQTPVFSK	AT5G45775.1;AT5G45775.2;AT4G18730.1;AT3G58700.1;AT2G42740.1	513
VLLLVWDDR	AT3G15730.1	514
VLNKPVEIQVGGR	AT1G20920.1;AT1G20920.2;AT3G09620.1	515
VLQFAGIDDVFTSSR	AT2G41840.1;AT3G57490.1;AT1G59359.1;AT1G58983.1;AT1G58684.1;AT1G58380.1	516
VLSNLIYNYK	AT1G78680.2;AT1G78680.1;AT1G78660.2;AT1G78660.3;AT1G78660.1;AT1G78670.1	517
VNNMVLFDQATYDK	AT4G39200.2;AT4G39200.1;AT4G34555.1;AT2G16360.1	518
VNSAAFPAPIEK	CON__P01868;CON__P01869	519
VNSAAFPAPIEKTISK	CON__P01868;CON__P01869	520
VNSAAFPAPIEKTISKTK	CON__P01868;CON__P01869	521
VNVIGVVDVYK	AT1G34190.1	522
VPTVDVSVVDLTVR	AT3G04120.1;AT1G13440.1;AT1G13440.2	523
VQALEEANNDLENK	CON__P35527	524
VQQLLQDFFNGK	AT5G02500.1;AT5G02500.2;AT3G12580.1	525
VQQLLVDFFNGK	AT3G09440.2;AT3G09440.1	526
VRGEEPPAELLAQER	AT1G03910.1;AT1G03910.2	527
VSGVSLLALFK	AT5G02960.1;AT3G09680.1	528
VSLYQDAHIPDNFVPR	AT3G15730.1	529
VTCVVVDISK	CON__P01868;CON__P01869	530
VTCVVVDISKDDPEVQFSWFVDDVEVHTAQTQPR	CON__P01868;CON__P01869	531
VTMQNLNDR	CON__P13645;CON__P02535-1;CON__Q7Z3Z0;CON__Q7Z3Y8;CON__Q148H6;CON__Q7Z3Y7;CON__Q7Z3Y9;CON__Q9Z2K1;CON__Q3ZAW8;CON__P02533;CON__A2A4G1;CON__P08779	532
VVDLADIVANNWK	AT1G12900.4;AT1G12900.3;AT3G26650.1;AT1G12900.1;AT1G12900.2	533
VVDVFIPR	AT5G64200.2;AT5G64200.1	534
VVHPFDAQAPGELSLAVDDYVIVR	AT1G31440.1	535
VVIEHGAVPIFVQLLASQSDDVR	AT4G16143.2;AT4G16143.1	536
VVIEQGAVPIFVK	AT1G09270.3;AT1G09270.2;AT1G09270.1	537
VVLEEAVVVK	AT3G44440.1	538
WDETDAIVVSGAK	AT1G32230.2;AT1G32230.3;AT1G32230.1	539
WKIDGSER	CON__P01837	540
WSPELAAACEVWK	ATCG00490.1	541
WTLLQEQGTK	CON__P13647;CON__P48668;CON__P02538;CON__P04259	542
YAWLPAKR	AT1G32230.2;AT1G32230.3;AT1G32230.1	543
YDTPFHSLFR	AT3G15730.1;AT1G52570.1	544
YEELQQTAGR	CON__P13647	545
YEELQVTAGR	CON__P48668;CON__P02538;CON__P04259;CON__O95678	546
YEELQVTVGR	CON__P35908	547
YGDENPDANTPLSR	AT1G31440.1	548
YGLIFHSSFIGR	AT1G56110.1;AT3G12860.1	549
YLDGLTAER	CON__P35908	550
YNFDGGVNITFVAVGNEPFLK	AT1G64760.2;AT1G64760.1	551
YPIGVASEGDITELPGFEFFPDTK	AT3G15730.1	552
YSDEIVR	AT1G05190.1	553
YSGGFRDSLDDKSK	AT4G24100.1	554
YWDFYSSESLEHDLPGHLLR	AT3G15730.1	555
YYEGISTAPR	AT1G79200.1	556

## Sheet: coverage of identified proteins
	AT1G32230	RCD1
		overview detected peptides	AASYAAYVTGVSCAK	KLEAAVSKWDETDAIVVSGAK	MFAVGTASLGHVPVLDVGR	VAENDMLLINADYQQLR
			AQFFSGGEEYDNGVDDIESPK	KMFAVGTASLGHVPVLDVGR	NYIVWNINMNTHIFPEFVVR	VIMGNMELLR
			CFFPEIYESDER	KSIYGVGIHLTAADCPYFSAR	RDNSGVTLEGPK	VIVGDDLLR
			DLPPQLESNGAR	LCGHSFILDFLHMQR	SAAIEFK	WDETDAIVVSGAK
			DNSGVTLEGPK	LEIDVNGGETPR	SIYGVGIHLTAADCPYFSAR	YAWLPAKR
			DNSGVTLEGPKDLPPQLESNGAR	LRLEIDVNGGETPR	SKEIPGSIR
			EVLSAVMMQGLGVGGAFIR	LSAYENR	SPWMPFPTLFAAISHK
			FKLSNLPNAEGNLIAK	LSNLPNAEGNLIAK	SSNEHYDEATEDSCSR
			FSSEIAEAR	LTGSEVLDKDAVK	STITTLQNQPK
			GDKAQFFSGGEEYDNGVDDIESPK	LTGSEVLDKDAVKK	TPLAWIDNAGK
		overview full protein with detected peptides	MEAKIVKVLDSSRCEDGFGKKRKRAASYAAYVTGVSCAKLQNVPPPNGQCQIPDKRRRLEGENKLSAYENRSGKALVRYYTYFKKTGIAKRVMMYENGEWNDLPEHVICAIQNELEEKSAAIEFKLCGHSFILDFLHMQRLDMETGAKTPLAWIDNAGKCFFPEIYESDERTNYCHHKCVEDPKQNAPHDIKLRLEIDVNGGETPRLNLEECSDESGDNMMDDVPLAQRSSNEHYDEATEDSCSRKLEAAVSKWDETDAIVVSGAKLTGSEVLDKDAVKKMFAVGTASLGHVPVLDVGRFSSEIAEARLALFQKQVEITKKHRGDANVRYAWLPAKREVLSAVMMQGLGVGGAFIRKSIYGVGIHLTAADCPYFSARYCDVDENGVRYMVLCRVIMGNM…
	AT1G34190	ANAC017
		overview detected peptides	MDPEELPGQSMLK
			VNVIGVVDVYK
		overview full protein with detected peptides	MADSSPDSCFKGGKFSAPGFRFHPTDEELVMYYLKRKICRKRLRVNVIGVVDVYKMDPEELPGQSMLKTGDRQWFYFTPRSRKYPNAARSNRGTENGYWKATGKDRVIEYNSRSVGLKKTLVFYRGRAPSGERTDWVMHEYTMDEDELGRCKNPQEYYALYKLFKKSGAGPKNGEQYGAPFQEEEWVDDDNEDVNAIAVAVPEQPVVRYEDARRVDERRLFNPVILQLEDIDELLNGIPNAPGVPQRCIPQVNSEEELQSTLVNNSAREFLPNGQQYNRPSSFDSLETAEVTSAPLVFEKEDFIEMDDLLLIPEFGASSTEKAAQFSNHGEFDDFNEFDQLFHDVSMSLDMEPIDQGTSANLSSLSDSANYTSDQKQQLLYQQFQDQTPENQLNNIMDP…

## Sheet: stickiness
At#	Uniprot	Table::Short description	Average Ratio	Stickiness
AT1G02690	Q3EDK3	IMPA-6 (IMPORTIN ALPHA ISOFORM 6); binding / protein transporter	277.401	0.18
AT1G03910	Q9ZWB1		5.5351	0.28
AT1G04270	Q08112	RPS15 (CYTOSOLIC RIBOSOMAL PROTEIN S15); structural constituent of ribosome	69.6534	0.56
AT1G04770	Q9MAS6	male sterility MS5 family protein
AT1G05190	O23049	emb2394 (embryo defective 2394); structural constituent of ribosome	244.643	0.3
AT1G07660	P59259	histone H4	17.8246	0.72
AT1G09270	O80480	IMPA-4 (IMPORTIN ALPHA ISOFORM 4); binding / protein transporter	270.404	0.16
AT1G12900	Q9LPW0	GAPA-2 (GLYCERALDEHYDE 3-PHOSPHATE DEHYDROGENASE A SUBUNIT 2); NAD or NADH binding / binding / catalytic/ glyceraldehyde-3-phosphate dehydrogenase (phosphorylating)/ glyceraldehyde-3-phosphate dehydrogenase	58.3807	0.36
AT1G13440	Q56WJ4	GAPC2 (GLYCERALDEHYDE-3-PHOSPHATE DEHYDROGENASE C2); NAD or NADH binding / binding / catalytic/ glyceraldehyde-3-phosphate dehydrogenase (phosphorylating)/ glyceraldehyde-3-phosphate dehydrogenase	67.7044	0.71
AT1G14320	Q93VT9	SAC52 (SUPPRESSOR OF ACAULIS 52); structural constituent of ribosome	18.8691	0.54
AT1G20340	P42699	DRT112; copper ion binding / electron carrier	15.4218	0.11
AT1G20920	Q8H0U8	DEAD box RNA helicase, putative	3.81808	0.43
AT1G23410	P59271	ubiquitin extension protein, putative / 40S ribosomal protein S27A (RPS27aA)	10.8907	0.6
AT1G26680	Q84WP3	transcriptional factor B3 family protein	0.869197	0.01
AT1G26910	Q08770	60S ribosomal protein L10 (RPL10B)	18.095	0.57
AT1G29910	P04777	CAB3 (CHLOROPHYLL A/B BINDING PROTEIN 3); chlorophyll binding	48.8591	0.51
AT1G29930	P04778	CAB1 (CHLOROPHYLL A/B BINDING PROTEIN 1); chlorophyll binding	48.8591	0.51
AT1G31330	Q9SHE8	PSAF (photosystem I subunit F)	16.2392	0.4
AT1G31340	Q9M1P9	RUB1 (RELATED TO UBIQUITIN 1); protein binding	11.3518	0.59
AT1G31440	Q9C865	SH3 domain-containing protein 1 (SH3P1)	240.076	0.35
AT1G32230	Q93YR6	RCD1 (RADICAL-INDUCED CELL DEATH1); protein binding	13652.9	0.01
AT1G34190	Q9XIC5	ANAC017 (Arabidopsis NAC domain containing protein 17); transcription factor	308.8	0.01
AT1G48830	Q9C514	40S ribosomal protein S7 (RPS7A)	41.3046	0.58
AT1G52570	Q9SSQ9	PLDALPHA2 (phosphlipase d alpha 2); phospholipase D	75.6562	0.42
AT1G54410	Q9SLJ2	dehydrin family protein	8.67578	0.22
AT1G55060	Q3E7K8	UBQ12 (UBIQUITIN 12); protein binding	11.3518	0.59
AT1G55490	P21240	CPN60B (CHAPERONIN 60 BETA); ATP binding / protein binding	31.8892	0.45
AT1G56110	Q9SGT7	NOP56 (Arabidopsis homolog of nucleolar protein Nop56)	4.77941	0.44
AT1G58380	Q8L8Y0	XW6; structural constituent of ribosome	55.7275	0.53
AT1G60830	Q9C6C1	U2 snRNP auxiliary factor large subunit, putative	37.3237	0.34
AT1G60900	Q8L716	U2 snRNP auxiliary factor large subunit, putative	50.1586	0.49
AT1G64760	Q6NKW9	glycosyl hydrolase family 17 protein	3.29957	0.01
AT1G65280	Q0WVU7	heat shock protein binding	5.79957	0.24
AT1G65350	Q7GAQ5	UBQ13; protein binding	11.3518	0.59
AT1G66580	Q93W22	60S ribosomal protein L10 (RPL10C)	18.7625	0.53
AT1G67090	P10795	RBCS1A (RIBULOSE BISPHOSPHATE CARBOXYLASE SMALL CHAIN 1A); copper ion binding / ribulose-bisphosphate carboxylase	100.203	0.39
AT1G68400	Q9M9C5	leucine-rich repeat transmembrane protein kinase, putative	1.93945	0.01
AT1G78090	Q9C9S4	ATTPPB (TREHALOSE-6-PHOSPHATE PHOSPHATASE); trehalose-phosphatase
AT1G79200	Q8GWY0	unknown protein	12.6209	0.48
AT2G01730	Q8GUU3	ATCPSF73-II (cleavage and polyadenylation specificity factor 73 kDa subunit-II); catalytic/ protein binding
AT2G04390	P49205	40S ribosomal protein S17 (RPS17A)	36.3895	0.48
AT2G05070	Q9S7J7	LHCB2.2; chlorophyll binding	631.257	0.46
AT2G05100	Q9SHR7	LHCB2.1; chlorophyll binding	631.257	0.46
AT2G05220	Q9SJ36	40S ribosomal protein S17 (RPS17B)	36.3895	0.48
AT2G07732	P93292	ribulose-bisphosphate carboxylase	4.28358	0.24
AT2G16360	Q9SIW5	40S ribosomal protein S25 (RPS25A)	9.30642	0.43
AT2G16940	Q9ZVW9	RNA recognition motif (RRM)-containing protein	2.75822	0.49
AT2G18740	A8MRL6	small nuclear ribonucleoprotein E, putative / snRNP-E, putative / Sm protein E, putative	2.40706	0.11
AT2G22600	Q9ZQ53	KH domain-containing protein
AT2G22690	Q9ZQ45	protein binding / zinc ion binding
AT2G23930	O82221	SNRNP-G (PROBABLE SMALL NUCLEAR RIBONUCLEOPROTEIN G)	3.35651	0.04
AT2G24090	Q8VZ55	ribosomal protein L35 family protein	6.88141	0.11
AT2G25050	Q9SK28	formin homology 2 domain-containing protein / FH2 domain-containing protein
AT2G25640	Q682K2	zinc ion binding	1.4109	0.01
AT2G31610	Q9SIP7	40S ribosomal protein S3 (RPS3A)	39.3079	0.62
AT2G33450	O22795	50S ribosomal protein L28, chloroplast (CL28)	36.9373	0.28
AT2G33800	P93014	ribosomal protein S5 family protein	24.1415	0.31
AT2G34420	Q39141	LHB1B2; chlorophyll binding	48.6985	0.52
AT2G34430	Q39142	LHB1B1; chlorophyll binding	50.4652	0.51
AT2G34710	O04291	PHB (PHABULOSA); DNA binding / transcription factor	1189.31	0.02
AT2G36170	B9DHA6	ubiquitin extension protein 2 (UBQ2) / 60S ribosomal protein L40 (RPL40A)	11.3518	0.59
AT2G37630	O80931	AS1 (ASYMMETRIC LEAVES 1); DNA binding / protein homodimerization/ transcription factor
AT2G38140	O80439	PSRP4 (PLASTID-SPECIFIC RIBOSOMAL PROTEIN 4); structural constituent of ribosome	435.122	0.2
AT2G39390	O80626	60S ribosomal protein L35 (RPL35B)	13.6508	0.21
AT2G39590	O80646	40S ribosomal protein S15A (RPS15aC)	16.8502	0.47
AT2G39730	P10896	RCA (RUBISCO ACTIVASE); ADP binding / ATP binding / enzyme regulator/ ribulose-1,5-bisphosphate carboxylase/oxygenase activator	28.6947	0.45
AT2G41840	P49688	40S ribosomal protein S2 (RPS2C)	34.0449	0.59
AT2G42740	P42795	RPL16A; structural constituent of ribosome	11.8812	0.64
AT2G43030	Q9SKX4	ribosomal protein L3 family protein	956.634	0.35
AT2G43795	B3H7M7	unknown protein	2.09949	0.12
AT2G44120	P60039	60S ribosomal protein L7 (RPL7C)	12.7817	0.56
AT2G47110	P59232	UBQ6; protein binding	10.8907	0.6
AT3G02560	Q9M885	40S ribosomal protein S7 (RPS7B)	201.116	0.39
AT3G03920	Q8VZT0	Gar1 RNA-binding region family protein	5.85161	0.37
AT3G03940	Q9SQR8	protein kinase family protein	38.4523	0.06
AT3G04120	P25858	GAPC1 (GLYCERALDEHYDE-3-PHOSPHATE DEHYDROGENASE C SUBUNIT 1); glyceraldehyde-3-phosphate dehydrogenase (phosphorylating)/ glyceraldehyde-3-phosphate dehydrogenase	665.584	0.66
AT3G04920	Q9SS17	40S ribosomal protein S24 (RPS24A)	25.6441	0.44
AT3G05060	Q9MAB3	SAR DNA-binding protein, putative	3.17379	0.42
AT3G05560	Q9M9W1	60S ribosomal protein L22-2 (RPL22B)	6.04803	0.44
AT3G06720	Q96321	IMPA-1 (IMPORTIN ALPHA ISOFORM 1); binding / protein transporter	26.6713	0.38
AT3G09070	Q9SS80	glycine-rich protein	16651.3	0.01
AT3G09440	O65719	heat shock cognate 70 kDa protein 3 (HSC70-3) (HSP70-3)	96.3806	0.6
AT3G09500	Q9SF53	60S ribosomal protein L35 (RPL35A)	5.8224	0.24
AT3G09620	Q9SF41	DEAD/DEAH box helicase, putative	1.39388	0.34
AT3G09680	Q9SF35	40S ribosomal protein S23 (RPS23A)	9.36089	0.53
AT3G09790	Q39256	UBQ8; protein binding	11.3518	0.59
AT3G10610	Q9SQZ1	40S ribosomal protein S17 (RPS17C)	36.3895	0.48
AT3G11500	Q9CAX7	small nuclear ribonucleoprotein G, putative / snRNP-G, putative / Sm protein G, putative	3.35651	0.04
AT3G12580	Q9LHA8	HSP70 (heat shock protein 70); ATP binding	27.7343	0.38
AT3G12860	Q9LTV0	nucleolar protein Nop56, putative	3.96509	0.36
AT3G12980	Q9LE42	HAC5; H3/H4 histone acetyltransferase/ histone acetyltransferase	2.27353	0.01
AT3G13470	Q9LJE4	chaperonin, putative	8.61109	0.42
AT3G13670	Q9LID3	protein kinase family protein	42.4643	0.18
AT3G14415	Q9LRS0	(S)-2-hydroxy-acid oxidase, peroxisomal, putative / glycolate oxidase, putative / short chain alpha-hydroxy acid oxidase, putative	33.0591	0.17
AT3G14420	Q9LRR9	(S)-2-hydroxy-acid oxidase, peroxisomal, putative / glycolate oxidase, putative / short chain alpha-hydroxy acid oxidase, putative	12.6463	0.2
AT3G15356	Q9LJR2	legume lectin family protein	4.70351	0.31
AT3G15730	Q38882	PLDALPHA1 (PHOSPHOLIPASE D ALPHA 1); phospholipase D	101.887	0.44
AT3G16530	Q9LK72	legume lectin family protein	4.99053	0.2
AT3G17570	Q9LUP1	F-box family protein
AT3G22890	Q9LIK9	APS1 (ATP SULFURYLASE 1); sulfate adenylyltransferase (ATP)	15.4045	0.03
AT3G23890	P30182	TOPII (TOPOISOMERASE II); ATP binding / DNA binding / DNA topoisomerase (ATP-hydrolyzing)/ DNA topoisomerase/ DNA-dependent ATPase
AT3G26650	P25856	GAPA (GLYCERALDEHYDE 3-PHOSPHATE DEHYDROGENASE A SUBUNIT); glyceraldehyde-3-phosphate dehydrogenase/ protein binding	19.9689	0.38
AT3G27690	Q9XF87	LHCB2.3; chlorophyll binding	605.505	0.48
AT3G29075	Q9LJV8	glycine-rich protein	3.67372	0.37
AT3G29310	Q9LIB3	calmodulin-binding protein-related	155.252	0.06
AT3G32410	Q3E727
AT3G44440	Q9M281	unknown protein
AT3G46040	Q9LX88	RPS15AD (ribosomal protein S15A D); structural constituent of ribosome	36.2823	0.63
AT3G47090	Q9SD64	leucine-rich repeat transmembrane protein kinase, putative
AT3G51150	Q0WQ71	kinesin motor family protein
AT3G52220	Q94JX8	unknown protein	573.624	0.44
AT3G52590	Q42202	UBQ1 (UBIQUITIN EXTENSION PROTEIN 1); protein binding / structural constituent of ribosome	11.3518	0.59
AT3G52720	O04846	ACA1 (ALPHA CARBONIC ANHYDRASE 1); carbonate dehydratase/ zinc ion binding	27.1163	0.07
AT3G53870	Q9M339	40S ribosomal protein S3 (RPS3B)	40.4188	0.63
AT3G57150	Q9LD90	NAP57 (Arabidopsis thaliana homologue of NAP57); pseudouridine synthase	2.39451	0.46
AT3G57490	Q9SCM3	40S ribosomal protein S2 (RPS2D)	38.3324	0.54
AT3G59800	Q9M1Z4	unknown protein	64.6681	0.2
AT3G60750	Q8RWV0	transketolase, putative	10.0197	0.31
AT3G62250	P59233	UBQ5 (ubiquitin 5); protein binding / structural constituent of ribosome	48.5896	0.56
AT3G62330	Q9LZQ7	zinc knuckle (CCHC-type) family protein
AT4G02150	O04294	MOS6 (MODIFIER OF SNC1, 6); binding / protein transporter	392.944	0.11
AT4G02890	Q3E7T8	UBQ14; protein binding	11.3518	0.59
AT4G05050	P0CH33	UBQ11 (UBIQUITIN 11); protein binding	12.0411	0.49
AT4G05320	Q8H159	UBQ10 (POLYUBIQUITIN 10); protein binding	11.3518	0.59
AT4G10450	Q9SZX9	60S ribosomal protein L9 (RPL90D)	40.6066	0.54
AT4G16143	Q9ASV4	IMPA-2 (IMPORTIN ALPHA ISOFORM 2); binding / protein transporter	6.81389	0.37
AT4G24100	Q8RWU9	protein kinase family protein
AT4G25940	Q8VYT2	epsin N-terminal homology (ENTH) domain-containing protein
AT4G27120	Q94C53	unknown protein
AT4G30330	Q8LAK5	small nuclear ribonucleoprotein E, putative / snRNP-E, putative / Sm protein E, putative	2.53108	0.1
AT4G34555	Q8GYL5	40S ribosomal protein S25, putative	7.57174	0.38
AT4G36690	O23212	ATU2AF65A; RNA binding / nucleic acid binding / nucleotide binding	8.97392	0.4
AT4G39200	Q9T029	40S ribosomal protein S25 (RPS25E)	10.4777	0.46
AT5G02500	P22953	HSC70-1 (HEAT SHOCK COGNATE PROTEIN 70-1); ATP binding	30.116	0.75
AT5G02610	Q9LZ41	60S ribosomal protein L35 (RPL35D)	6.95029	0.31
AT5G02960	P49201	40S ribosomal protein S23 (RPS23B)	9.36089	0.53
AT5G03240	Q1EC66	UBQ3 (POLYUBIQUITIN 3); protein binding	11.3518	0.59
AT5G04800	Q9LZ17	40S ribosomal protein S17 (RPS17D)	36.3895	0.48
AT5G08180	Q9LEY9	ribosomal protein L7Ae/L30e/S12e/Gadd45 family protein	3.04256	0.42
AT5G09510	Q9FY64	40S ribosomal protein S15 (RPS15D)	74.0731	0.55
AT5G11400	Q9LFL7	protein kinase-related	3.38673	0.01
AT5G12230	Q9FMP0	unknown protein	4.3005	0.43
AT5G16130	Q8LD03	40S ribosomal protein S7 (RPS7C)	77.3652	0.5
AT5G16780	Q9LFE0	DOT2 (DEFECTIVELY ORGANIZED TRIBUTARIES 2)	3.06753	0.4
AT5G20310	Q3E9A3
AT5G20620	P0CH32	UBQ4; protein binding	12.0411	0.49
AT5G23060	Q9FN48	CaS (Calcium sensing receptor)	36.6924	0.15
AT5G23080	Q8GXN9	TGH (TOUGH); RNA binding / protein binding	17.4938	0.38
AT5G27770	Q9FE58	60S ribosomal protein L22 (RPL22C)	17.1243	0.37
AT5G28060	Q8LC83	40S ribosomal protein S24 (RPS24B)	15.2549	0.48
AT5G35530	Q9FJA6	40S ribosomal protein S3 (RPS3C)	39.8934	0.62
AT5G37500	Q94A76	GORK (GATED OUTWARDLY-RECTIFYING K+ CHANNEL); cyclic nucleotide binding / inward rectifier potassium channel/ outward rectifier potassium channel
AT5G37640	Q9FHQ6	UBQ9; protein binding	11.3518	0.59
AT5G38410	P10798	ribulose bisphosphate carboxylase small chain 3B / RuBisCO small subunit 3B (RBCS-3B) (ATS3B)	35.3459	0.41
AT5G38420	P10797	ribulose bisphosphate carboxylase small chain 2B / RuBisCO small subunit 2B (RBCS-2B) (ATS2B)	35.8568	0.39
AT5G38430	P10796	ribulose bisphosphate carboxylase small chain 1B / RuBisCO small subunit 1B (RBCS-1B) (ATS1B)	125.725	0.26
AT5G42340	Q681N2	binding / ubiquitin-protein ligase
AT5G53800	Q8LCP8	unknown protein	12.9983	0.45
AT5G56500	C0Z361	ATP binding / protein binding	9.06435	0.43
AT5G60250	Q9LSS2	zinc finger (C3HC4-type RING finger) family protein
AT5G62200	Q9LVB6	embryo-specific protein-related	55.3882	0.14
AT5G64200	Q9FMG4	ATSC35; RNA binding / nucleic acid binding / nucleotide binding	7.60895	0.36
AT5G65220	Q9FJP3	ribosomal protein L29 family protein	563.948	0.29
AT5G66470	Q8VZ74	GTP binding / RNA binding	3.18354	0.07
