# Supplementary material for: Arabidopsis RCD1 coordinates chloroplast and mitochondrial functions through interaction with ANAC transcription factors
Source: eLife journal article supplement (doi:10.7554/elife.43284), 2019-02-15
Supplement: supp [file elife-43284-supp-v1.zip › elife_poa_e43284_Figure_7_source_data_4.xlsx]

## Sheet: Fig. 7C
Source data
	hours
	0	15
Col-0	0.589487	-0.145631
	0.578947	-0.113636
	0.610199	-0.0680272
	0.587444	-0.0884956
	0.64859	-0.170455
	0.569919	-0.0806452
rcd1	0.68161	0.732323
	0.6966	0.697509
	0.679839	0.717292
	0.691436	0.721983
	0.687124	0.725921
	0.689257	0.715993
RCD1-HA (2.1)	0.618214	-0.0864198
	0.587374	-0.113636
	0.566729	-0.0538922
	0.594482	-0.0636943
	0.622672	-0.0838323
	0.631006	-0.0925926
RCD1-HA (4.1)	0.612	-0.0813953
	0.647541	-0.151515
	0.653912	0.345088
	0.634961	-0.113636
	0.680739	0.572086
	0.605419	-0.0787402
RCD1ΔRST-HA (1.1)	0.675585	0.679785
	0.676245	0.62828
	0.685692	0.681771
	0.687402	0.643204
	0.674857	0.668484
	0.667729	0.638322
RCD1ΔRST-HA (17.2)	0.679217	0.686185
	0.662078	0.578
	0.675799	0.632488
	0.647604	0.598237
	0.677873	0.664596
	0.677036	0.67587
Univariate Analysis of Variance
Tests of Between-Subjects Effects
Source	Type III Sum of Squares	df	Mean Square	F	Sig.
Corrected Model	6.663a	11	0.60573	74.0827	1.12093e-30
Intercept	16.6917	1	16.6917	2041.45	4.85429e-48
VAR00002	1.94669	1	1.94669	238.087	1.48717e-22
VAR00004	2.80706	5	0.561411	68.6624	1.55826e-23
VAR00002 * VAR00004	1.90928	5	0.381856	46.7022	1.95356e-19
Error	0.490584	60	0.0081764
Total	23.8453	72
Corrected Total	7.15361	71
a. R Squared = .931 (Adjusted R Squared = .919)
Post Hoc Tests
Multiple Comparisons. Bonferroni
		Mean Difference (I-J)	Std. Error	Sig.	95% Confidence Interval
					Lower Bound	Upper Bound
Col-0	rcd1	-.4600*	0.0369152	4.07456e-17	-0.57286	-0.34714
	RCD1-HA (2.1)	-0.0173333	0.0369152	1	-0.130193	0.0955264
	RCD1-HA (4.1)	-.1174*	0.0369152	0.0348909	-0.230276	-0.00455694
	RCD1ΔRST-HA (1.1)	-.4242*	0.0369152	1.28542e-15	-0.537026	-0.311307
	RCD1ΔRST-HA (17.2)	-.4115*	0.0369152	4.47744e-15	-0.52436	-0.29864
rcd1	Col-0	.4600*	0.0369152	4.07456e-17	0.34714	0.57286
	RCD1-HA (2.1)	.4427*	0.0369152	2.13179e-16	0.329807	0.555526
	RCD1-HA (4.1)	.3426*	0.0369152	5.01332e-12	0.229724	0.455443
	RCD1ΔRST-HA (1.1)	0.0358333	0.0369152	1	-0.0770264	0.148693
	RCD1ΔRST-HA (17.2)	0.0485	0.0369152	1	-0.0643597	0.16136
RCD1-HA (2.1)	Col-0	0.0173333	0.0369152	1	-0.0955264	0.130193
	rcd1	-.4427*	0.0369152	2.13179e-16	-0.555526	-0.329807
	RCD1-HA (4.1)	-0.100083	0.0369152	0.130975	-0.212943	0.0127764
	RCD1ΔRST-HA (1.1)	-.4068*	0.0369152	7.11632e-15	-0.519693	-0.293974
	RCD1ΔRST-HA (17.2)	-.3942*	0.0369152	2.52661e-14	-0.507026	-0.281307
RCD1-HA (4.1)	Col-0	.1174*	0.0369152	0.0348909	0.00455694	0.230276
	rcd1	-.3426*	0.0369152	5.01332e-12	-0.455443	-0.229724
	RCD1-HA (2.1)	0.100083	0.0369152	0.130975	-0.0127764	0.212943
	RCD1ΔRST-HA (1.1)	-.3068*	0.0369152	2.18239e-10	-0.41961	-0.19389
	RCD1ΔRST-HA (17.2)	-.2941*	0.0369152	8.38578e-10	-0.406943	-0.181224
RCD1ΔRST-HA (1.1)	Col-0	.4242*	0.0369152	1.28542e-15	0.311307	0.537026
	rcd1	-0.0358333	0.0369152	1	-0.148693	0.0770264
	RCD1-HA (2.1)	.4068*	0.0369152	7.11632e-15	0.293974	0.519693
	RCD1-HA (4.1)	.3068*	0.0369152	2.18239e-10	0.19389	0.41961
	RCD1ΔRST-HA (17.2)	0.0126667	0.0369152	1	-0.100193	0.125526
RCD1ΔRST-HA (17.2)	Col-0	.4115*	0.0369152	4.47744e-15	0.29864	0.52436
	rcd1	-0.0485	0.0369152	1	-0.16136	0.0643597
	RCD1-HA (2.1)	.3942*	0.0369152	2.52661e-14	0.281307	0.507026
	RCD1-HA (4.1)	.2941*	0.0369152	8.38578e-10	0.181224	0.406943
	RCD1ΔRST-HA (1.1)	-0.0126667	0.0369152	1	-0.125526	0.100193
Based on observed means. The error term is Mean Square(Error) = .008.
*. The mean difference is significant at the 0.05 level.
