# Supplementary material for: Arabidopsis RCD1 coordinates chloroplast and mitochondrial functions through interaction with ANAC transcription factors
Source: eLife journal article supplement (doi:10.7554/elife.43284), 2019-02-15
Supplement: supp [file elife-43284-supp-v1.zip › elife_poa_e43284_Figure_8_source_data_1.xlsx]

## Sheet: Fig. 8B
Source data								Source data
	hours								hours
MV 0.25 uM	0	15						MV 1 uM	0	15
Col-0	0.750857	0.520531						Col-0	0.765031	-0.172549
	0.7425	0.552941							0.775011	-0.159184
	0.752787	0.343949							0.767497	-0.104167
	0.739394	0.207746							0.775819	-0.138776
	0.739583	0.0765306							0.769359	-0.181481
	0.745289	0.453608							0.758608	-0.152941
anac017	0.758865	-0.147157						anac017	0.759	-0.142395
	0.753942	0.12892							0.769446	-0.169231
	0.755979	0.0490196							0.771144	-0.112069
	0.758919	0							0.7804	-0.170213
	0.737805	0.248512							0.768121	-0.183673
	0.757164	-0.0291545							0.771331	-0.0704225
rcd1-4	0.759655	0.756283						rcd1-4	0.747368	0.743679
	0.768806	0.76551							0.760227	0.710893
	0.753212	0.742918							0.777735	0.741567
	0.76223	0.767466							0.776427	0.766871
	0.741449	0.720247							0.755912	0.723647
	0.75779	0.753955							0.775657	0.757471
rcd1-1	0.764919	0.715533						rcd1-1	0.735135	0.732365
	0.754628	0.733744							0.717565	0.712594
	0.76278	0.750159							0.760661	0.729227
	0.765331	0.737801							0.766681	0.657676
	0.767407	0.701054							0.767001	0.712171
	0.694816	0.72816							0.76262	0.67981
rcd1-1 anac017	0.755506	0.662118						rcd1-1 anac017	0.745891	0.487179
	0.750876	0.664276							0.717857	0.379707
	0.759962	0.621324							0.766667	0.493755
	0.748586	0.641677							0.773244	0.530651
	0.760787	0.667585							0.762023	0.592764
	0.753656	0.681818							0.768947	0.429825
Univariate Analysis of Variance								Univariate Analysis of Variance
0.25 μM methyl viologen								1 μM methyl viologen
Between-Subjects Factors								Between-Subjects Factors
		Value Label	N							Value Label	N
VAR00001	1.00	Col-0	12					VAR00001	1.00	Col-0	12
	2.00	anac017	12						2.00	anac017	12
	3.00	rcd1-4	12						3.00	rcd1-4	12
	4.00	rcd1-1	12						4.00	rcd1-1	12
	5.00	rcd1-1 anac017	12						5.00	rcd1-1 anac017	12
VAR00002	1.00	0 hrs	30					VAR00002	1.00	0 hrs	30
	2.00	15 hrs	30						2.00	15 hrs	30
Tests of Between-Subjects Effects								Tests of Between-Subjects Effects
Source	Type III Sum of Squares	df	Mean Square	F	Sig.			Source	Type III Sum of Squares	df	Mean Square	F	Sig.
Corrected Model	3.337a	9	0.370833	56.4721	4.20601e-23			Corrected Model	8.025a	9	0.891648	424.594	5.19846e-44
Intercept	24.7042	1	24.7042	3762.06	9.96113e-49			Intercept	18.2602	1	18.2602	8695.32	9.57947e-58
VAR00001	1.19167	4	0.297917	45.368	4.73857e-16			VAR00001	2.25233	4	0.563083	268.135	4.12259e-33
VAR00002	1.04017	1	1.04017	158.401	4.06453e-17			VAR00002	3.22017	1	3.22017	1533.41	3.47837e-39
VAR00001 * VAR00002	1.10567	4	0.276417	42.0939	2.00044e-15			VAR00001 * VAR00002	2.55233	4	0.638083	303.849	2.07364e-34
Error	0.328333	50	0.00656667					Error	0.105	50	0.0021
Total	28.37	60						Total	26.39	60
Corrected Total	3.66583	59						Corrected Total	8.12983	59
a. R Squared = .910 (Adjusted R Squared = .894)								a. R Squared = .987 (Adjusted R Squared = .985)
Post Hoc Tests								Post Hoc Tests
Multiple Comparisons. Bonferroni								Multiple Comparisons. Bonferroni
		Mean Difference (I-J)	Std. Error	Sig.	95% Confidence Interval					Mean Difference (I-J)	Std. Error	Sig.	95% Confidence Interval
					Lower Bound	Upper Bound							Lower Bound	Upper Bound
Col-0	anac017	.1417*	0.0330824	0.000838047	0.0445049	0.238828		Col-0	anac017	-0.00833333	0.0187083	1	-0.0632789	0.0466122
	rcd1-4	-.2250*	0.0330824	1.22832e-07	-0.322162	-0.127838			rcd1-4	-.4417*	0.0187083	9.04948e-28	-0.496612	-0.386721
	rcd1-1	-.2000*	0.0330824	1.85992e-06	-0.297162	-0.102838			rcd1-1	-.4167*	0.0187083	1.30048e-26	-0.471612	-0.361721
	rcd1-1 anac017	-.1750*	0.0330824	2.71233e-05	-0.272162	-0.0778382			rcd1-1 anac017	-.3083*	0.0187083	7.51428e-21	-0.363279	-0.253388
anac017	Col-0	-.1417*	0.0330824	0.000838047	-0.238828	-0.0445049		anac017	Col-0	0.00833333	0.0187083	1	-0.0466122	0.0632789
	rcd1-4	-.3667*	0.0330824	4.50894e-14	-0.463828	-0.269505			rcd1-4	-.4333*	0.0187083	2.169e-27	-0.488279	-0.378388
	rcd1-1	-.3417*	0.0330824	5.37099e-13	-0.438828	-0.244505			rcd1-1	-.4083*	0.0187083	3.25586e-26	-0.463279	-0.353388
	rcd1-1 anac017	-.3167*	0.0330824	6.85803e-12	-0.413828	-0.219505			rcd1-1 anac017	-.3000*	0.0187083	2.38779e-20	-0.354946	-0.245054
rcd1-4	Col-0	.2250*	0.0330824	1.22832e-07	0.127838	0.322162		rcd1-4	Col-0	.4417*	0.0187083	9.04948e-28	0.386721	0.496612
	anac017	.3667*	0.0330824	4.50894e-14	0.269505	0.463828			anac017	.4333*	0.0187083	2.169e-27	0.378388	0.488279
	rcd1-1	0.025	0.0330824	1	-0.0721618	0.122162			rcd1-1	0.025	0.0187083	1	-0.0299456	0.0799456
	rcd1-1 anac017	0.05	0.0330824	1	-0.0471618	0.147162			rcd1-1 anac017	.1333*	0.0187083	3.79873e-08	0.0783878	0.188279
rcd1-1	Col-0	.2000*	0.0330824	1.85992e-06	0.102838	0.297162		rcd1-1	Col-0	.4167*	0.0187083	1.30048e-26	0.361721	0.471612
	anac017	.3417*	0.0330824	5.37099e-13	0.244505	0.438828			anac017	.4083*	0.0187083	3.25586e-26	0.353388	0.463279
	rcd1-4	-0.025	0.0330824	1	-0.122162	0.0721618			rcd1-4	-0.025	0.0187083	1	-0.0799456	0.0299456
	rcd1-1 anac017	0.025	0.0330824	1	-0.0721618	0.122162			rcd1-1 anac017	.1083*	0.0187083	4.62112e-06	0.0533878	0.163279
rcd1-1 anac017	Col-0	.1750*	0.0330824	2.71233e-05	0.0778382	0.272162		rcd1-1 anac017	Col-0	.3083*	0.0187083	7.51428e-21	0.253388	0.363279
	anac017	.3167*	0.0330824	6.85803e-12	0.219505	0.413828			anac017	.3000*	0.0187083	2.38779e-20	0.245054	0.354946
	rcd1-4	-0.05	0.0330824	1	-0.147162	0.0471618			rcd1-4	-.1333*	0.0187083	3.79873e-08	-0.188279	-0.0783878
	rcd1-1	-0.025	0.0330824	1	-0.122162	0.0721618			rcd1-1	-.1083*	0.0187083	4.62112e-06	-0.163279	-0.0533878
Based on observed means. The error term is Mean Square(Error) = .007.								Based on observed means. The error term is Mean Square(Error) = .002.
*. The mean difference is significant at the 0.05 level.								*. The mean difference is significant at the 0.05 level.

## Sheet: Fig. 8D
Source data
	Initial	KCN	SHAM
Col-0	0.188227	0.0141818	-0.000681818
	0.308571	0.0536429	0.0390714
	0.269143	0.0241429	0.01025
	0.243	0.0261923	0
rcd1-1	0.329462	0.234731	0.0170769
	0.201889	0.164222	0.0162593
	0.277308	0.2875	0.0513846
	0.448929	0.288643	0.0433571
	0.275828	0.340586	0
	0.235889	0.174593	0.018963
rcd1-1 anac017	0.218731	0.0880769	0
	0.175333	0.0898889	0.028
	0.24963	0.143926	0.00666667
	0.265741	0.12737	0.0411481
	0.221393	0.122036	0.0178214
	0.270407	0.131593	0.0321481
anac017	0.220154	0.0503846	0.0206538
	0.273	0.0561852	0.00451852
	0.289741	0.019	0.00511111
	0.27	0.0527407	0.0022963
	0.296259	0.093963	0.0272222
	0.269593	0.109296	0.0168889
Oneway ANOVA								Oneway ANOVA								Oneway ANOVA
Untreated seedlings								KCN-treated seedlings								KCN, SHAM-treated seedlings
	Sum of Squares	df	Mean Square	F	Sig.				Sum of Squares	df	Mean Square	F	Sig.				Sum of Squares	df	Mean Square	F	Sig.
Between Groups	0.0120406	3	0.00401352	1.3052	0.303366			Between Groups	0.15063	3	0.05021	27.2116	6.61047e-07			Between Groups	0.000606339	3	0.000202113	0.785219	0.517666
Within Groups	0.0553505	18	0.00307503					Within Groups	0.0332131	18	0.00184517					Within Groups	0.00463314	18	0.000257397
Total	0.0673911	21						Total	0.183843	21						Total	0.00523948	21
Post Hoc Tests								Post Hoc Tests								Post Hoc Tests
Multiple Comparisons. Bonferroni								Multiple Comparisons. Bonferroni								Multiple Comparisons. Bonferroni
		Mean Difference (I-J)	Std. Error	Sig.	95% Confidence Interval					Mean Difference (I-J)	Std. Error	Sig.	95% Confidence Interval					Mean Difference (I-J)	Std. Error	Sig.	95% Confidence Interval
					Lower Bound	Upper Bound							Lower Bound	Upper Bound							Lower Bound	Upper Bound
Col-0	rcd1-1	-0.0426485	0.0357947	1	-0.148699	0.0634018		Col-0	rcd1-1	-.21884*	0.0277276	1.78204e-06	-0.300989	-0.13669		Col-0	rcd1-1	-0.0123469	0.0103561	1	-0.0430293	0.0183354
	rcd1-1 anac017	0.0186963	0.0357947	1	-0.087354	0.124747			rcd1-1 anac017	-.08761*	0.0277276	0.0325369	-0.169758	-0.00545885			rcd1-1 anac017	-0.00880416	0.0103561	1	-0.0394865	0.0218782
	anac017	-0.0175557	0.0357947	1	-0.123606	0.0884946			anac017	-0.034055	0.0277276	1	-0.116205	0.0480946			anac017	-0.000621911	0.0103561	1	-0.0313043	0.0300605
rcd1-1	Col-0	0.0426485	0.0357947	1	-0.0634018	0.148699		rcd1-1	Col-0	.21884*	0.0277276	1.78204e-06	0.13669	0.300989		rcd1-1	Col-0	0.0123469	0.0103561	1	-0.0183354	0.0430293
	rcd1-1 anac017	0.0613447	0.0320158	0.428253	-0.0335095	0.156199			rcd1-1 anac017	.13123*	0.0248003	0.000297715	0.0577539	0.204708			rcd1-1 anac017	0.00354275	0.00926277	1	-0.0239004	0.0309859
	anac017	0.0250928	0.0320158	1	-0.0697614	0.119947			anac017	.18478*	0.0248003	3.98704e-06	0.111307	0.258261			anac017	0.011725	0.00926277	1	-0.0157181	0.0391681
rcd1-1 anac017	Col-0	-0.0186963	0.0357947	1	-0.124747	0.087354		rcd1-1 anac017	Col-0	.08761*	0.0277276	0.0325369	0.00545885	0.169758		rcd1-1 anac017	Col-0	0.00880416	0.0103561	1	-0.0218782	0.0394865
	rcd1-1	-0.0613447	0.0320158	0.428253	-0.156199	0.0335095			rcd1-1	-.13123*	0.0248003	0.000297715	-0.204708	-0.0577539			rcd1-1	-0.00354275	0.00926277	1	-0.0309859	0.0239004
	anac017	-0.036252	0.0320158	1	-0.131106	0.0586023			anac017	0.0535534	0.0248003	0.267373	-0.0199234	0.12703			anac017	0.00818225	0.00926277	1	-0.0192609	0.0356254
anac017	Col-0	0.0175557	0.0357947	1	-0.0884946	0.123606		anac017	Col-0	0.034055	0.0277276	1	-0.0480946	0.116205		anac017	Col-0	0.000621911	0.0103561	1	-0.0300605	0.0313043
	rcd1-1	-0.0250928	0.0320158	1	-0.119947	0.0697614			rcd1-1	-.18478*	0.0248003	3.98704e-06	-0.258261	-0.111307			rcd1-1	-0.011725	0.00926277	1	-0.0391681	0.0157181
	rcd1-1 anac017	0.036252	0.0320158	1	-0.0586023	0.131106			rcd1-1 anac017	-0.0535534	0.0248003	0.267373	-0.12703	0.0199234			rcd1-1 anac017	-0.00818225	0.00926277	1	-0.0356254	0.0192609
								*. The mean difference is significant at the 0.05 level.
