# Supplementary material for: Arabidopsis RCD1 coordinates chloroplast and mitochondrial functions through interaction with ANAC transcription factors
Source: eLife journal article supplement (doi:10.7554/elife.43284), 2019-02-15
Supplement: supp [file elife-43284-supp-v1.zip › elife_poa_e43284_Supplementary_File_1.xlsx]

## Sheet: Primers
Cloning
Elements for the in planta RCD1-3xVenus construct
	attB4-pUB10 for	GGGGACAACTTTGTATAGAAAAGTTGAAgtcgacgagtcagtaataaacg
	attB1-pUB10 rev	GGGGACTGCTTTTTTGTACAAACTTGTctgttaatcagaaaaactcagat
	attB1-RCD1 for	GGGGACAAGTTTGTACAAAAAAGCAGGCTaaATGGAAGCCAAGATCGTCA
	attB2-RCD1 rev	GGGGACCACTTTGTACAAGAAAGCTGGGTcCAATCCACCTGCACCTTCTT
In planta RCD1Δ7Cys-HA construct
	Nde-C2A-C3A for*	GCTGCATATGTTACTGGAGTTTCGGCTGCAAAGCTGCAAAATGTGCCCCCACCGAACGGGCAGGCCCAAATTC
	PpuMI rev*	CTTAGGTCCTTCCAAAGTGACCCCTG
	*These primers were used in the PCR reaction with genomic sequence of RCD1 in the pDONR/Zeo vector. The obtained fragment was introduced into pDONR/Zeo using NdeI and PpuMI restriction enzymes.
	Further point mutations of cysteins were introduced by circular PCR of RCD1/pDONR/Zeo with the primers indicated below
	C1A for	GTCAAGGTGTTGGATAGTAGTAGGgcTGAAGATGGATTCGGAAAAAAG
	C1A rev	CTTTTTTCCGAATCCATCTTCAgcCCTACTACTATCCAACACCTTGAC
	C7A-C8A for	AGGACCAATTACgcCCATCATAAAgcTGTGGAAGACCCA
	C7A-C8A rev	TGGGTCTTCCACAgcTTTATGATGGgcGTAATTGGTCCT
	C9A for	TAAATTTGGAGGAGgcCAGTGATGAGTCTG
	C9A rev	CAGACTCATCACTGgcCTCCTCCAAATTTA
	C10A for	TACGGAGGATAGCgcCAGCCGCAAGCTCGA
	C10A rev	TCGAGCTTGCGGCTGgcGCTATCCTCCGTA
In planta RCD1ΔRST-HA construct
	RCD1ΔRST for**	gACCCAGCTTTCTTGTACAA
	RCD1ΔRST rev**	CAAGAAAGCTGGGTcAATCAAATTACCTTCAGCATTGG
	**These primers were used in the PCR reaction with genomic sequence of RCD1/pDONR/Zeo vector followed by end-joining with In-Fusion (Clontech).
Expression in HEK293T cells
Symthesized codon-optimized genes
	3xHA-RCD1	ggatccGCCGCCACCATGTATCCCTACGACGTGCCCGACTATGCAGGCTATCCTTATGACGTCCCCGATTATGCCGGGTCCTACCCATACGATGTGCCTGACTACGCTGCCATGGAGGCTAAGATCGTGAAAGTGCTGGATTCCAGCAGGTGTGAGGACGGCTTCGGCAAAAAGAGGAAGAGGGCCGCAAGCTACGCCGCCTATGTCACCGGCGTGTCCTGTGCAAAGCTGCAGAATGTGCCCCCACCCAACGGCCAATGCCAAATTCCCGACAAGAGGAGGAGGCTGGAAGGCGAGAATAAGCTGTCCGCCTACGAAAACAGGTCCGGCAAAGCACTGGTCAGATACTACACCTACTTCAAGAAAACCGGGATCGCTAAGAGAGTGATGATGTACGAG…
	ANAC013-3xmyc	ggatccGCCGCCACCATGGACCTGTCCGTCGAAAACGGAGGACTGGCCCCAGGCTTTAGGTTCCACCCCACCGACGAAGAGCTGGTCGTCTATTATCTGAAAAGGAAGATTAGAAGGAAAAAACTGAGAGTCGAGGCCATCGGAGAGACCGACGTCTACAAGTTCGACCCCGAAGAACTGCCCGAGAAGGCCCTGTATAAGACTAGGGACAGACAATGGTTCTTCTTTAGCCTGAGAGACAGAAAGCACGGCTCCAGAAGCTCCAGGGCTACAGAGAGGGGCTACTGGAAGGCAACCGGAAAAGATAGAGTCATTCACTGCGACTCCAGACCAGTGGGCGAGAAGAAAACTCTGGTCTTTCACAGAGGCAGAGCTCCCAACGGCGAAAGGACAAACTGG…
Primers for amlification of the gene
	ANAC17 for	taaaagcttATGGCGGATTCTTCAC
	ANAC17-2myc rev	atataactcgagCTACAGATCTTCTTCAGAAATAAGTTTTTGTTCCATCAGATCTTCTTCAGAAATAAGTTTTTGTTCCATGTCTTTCAAGAGAAGACTTC
Quantitative PCR
Gene Identifier		Primer sequence		Amplification effiency
At3g22370	AOX1a for	GCATCATGTTCCAACGACGTTTCT		1.958
	AOX1a rev	TTCAAGCATCATAGCTCGACATCCA
At2g21640	UPOX1 for	CAAACCTCAAGGATCACATGGATGA		2
	UPOX1 rev	GCCTTGGAGAAGCTCCCGAATATCT
At5g59820	ZAT12 for	CATCCGCAGATTTAGGAAACTT		1.926
	ZAT12 rev	ACGTCGGCAAAATAGGCTAA
At1g32230	RCD1_RT_F	gaggttcaggaagtgcaaacagt		1.889
	RCD1_RT_R	aacagagtaggaaatggcatcca
At1g32870	ANAC013 for***	CCATAGAGGCAGGGCACCTAATGG		1.807
	ANAC013 rev***	CCATTCTTAGGACCAGACCCAC
At5g24640	At5g24640 for	TTTAATCCTCGACACACCAACC		2
	At5g24640 rev	TACTTGGACCGCTCACTTTCTC
At1g13320	PP2AA3 for	GCGGTTGTGGAGAACATGATACG	Normalization/Reference gene	1.967
	PP2AA3 rev	GAACCAAACACAATTCGTTGCTG	Normalization/Reference gene
At4g34270	TIP41 for	GTGAAAACTGTTGGAGAGAAGCAA	Normalization/Reference gene	1.86
	TIP41 rev	TCAACTGGATACCCTTTCGCA	Normalization/Reference gene
At5g08290	YLS8 for	TTACTGTTTCGGTTGTTCTCCATTT	Normalization/Reference gene	1.822
	YLS8 rev	CACTGAATCATGTTCGAAGCAAGT	Normalization/Reference gene
	***[Van Aken, O., I. De Clercq, A. Ivanova, S. R. Law, F. Van Breusegem, A. H. Millar and J. Whelan. Mitochondrial and Chloroplast Stress Responses Are Modulated in Distinct Touch and Chemical Inhibition Phases. (2016) Plant Physiology 171(3): 2150-2165].
