# Supplementary figures and images for: Arabidopsis RCD1 coordinates chloroplast and mitochondrial functions through interaction with ANAC transcription factors
Source: eLife journal article supplement (doi:10.7554/elife.43284), 2019-02-15

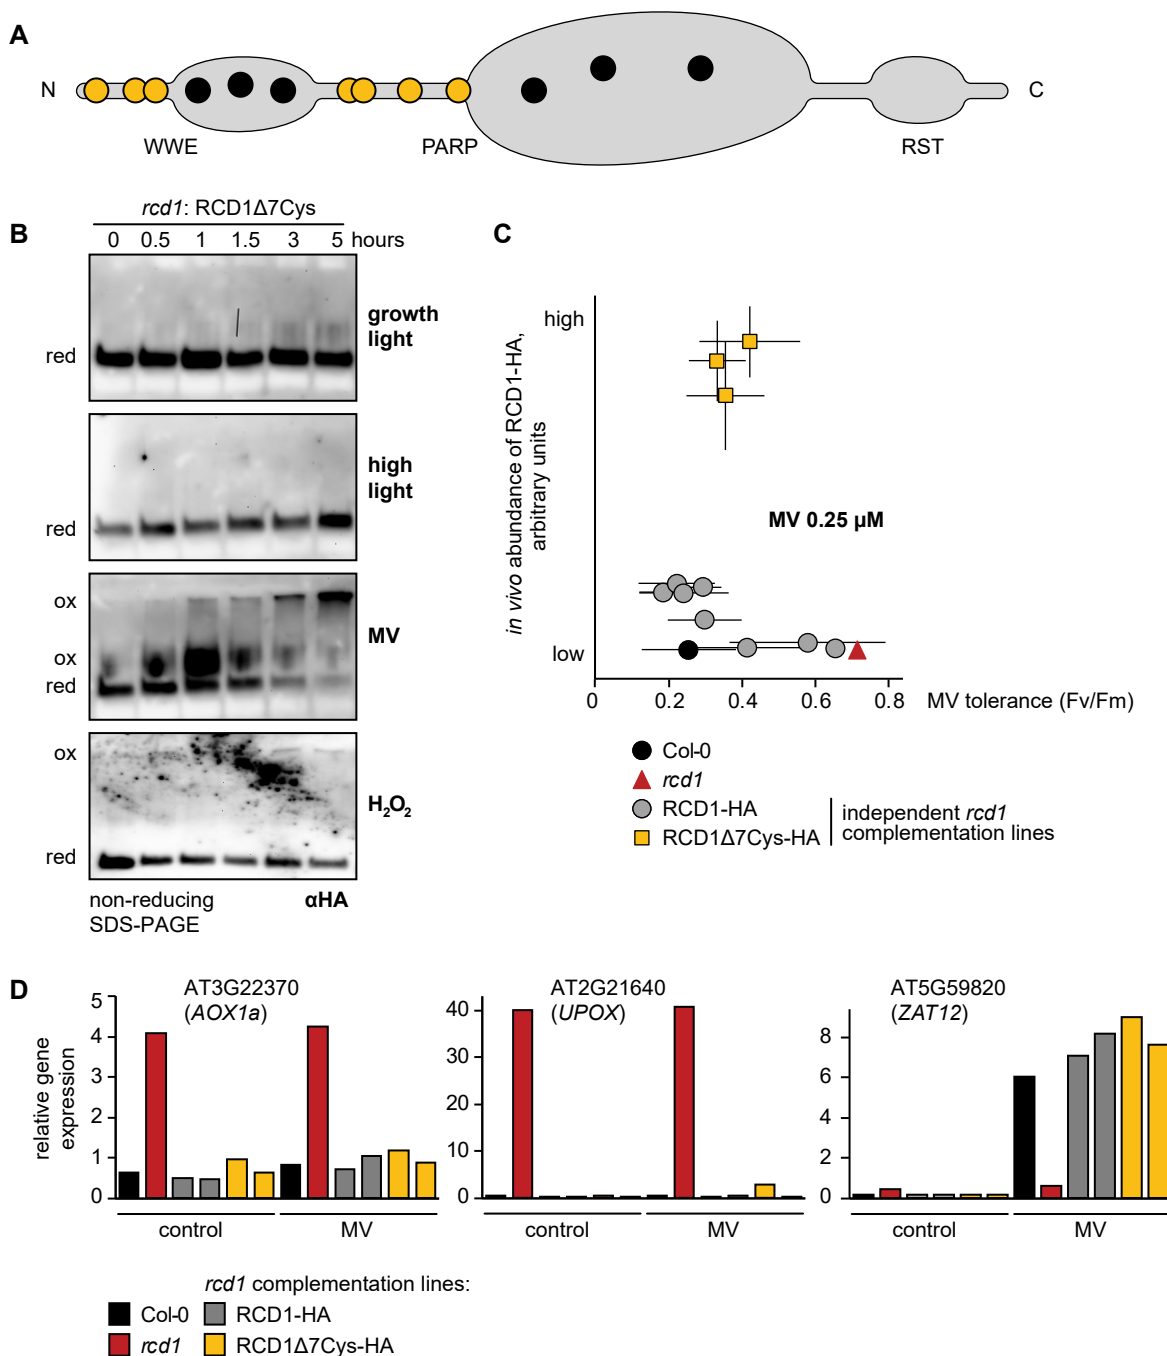

**Figure 2 – figure supplement 1. Characterization of the *rcd1*: RCD1Δ7Cys-HA lines.**

Supplement: supp [file elife-43284-supp-v1.zip]

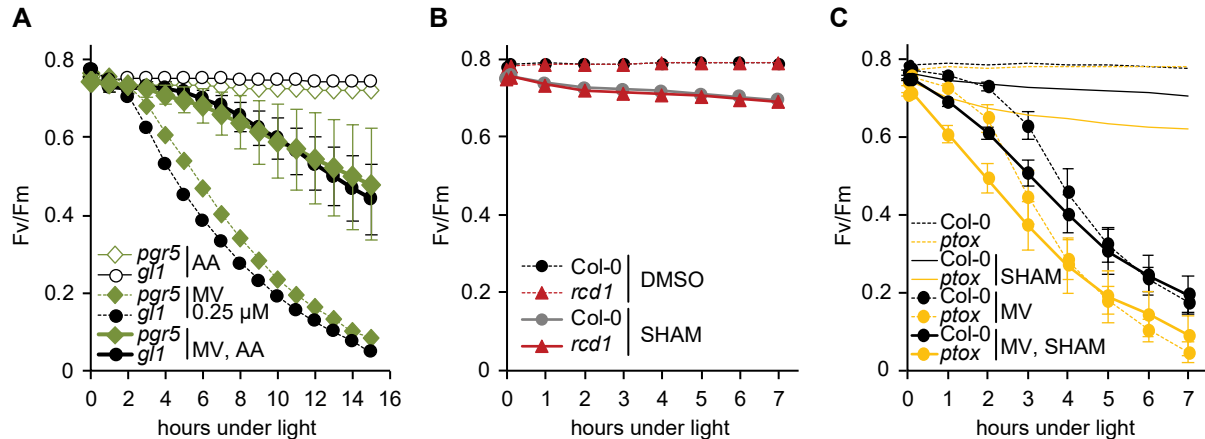

**Figure 4 – figure supplement 3. Specificity of inhibitor treatments.**

Supplement: supp [file elife-43284-supp-v1.zip]

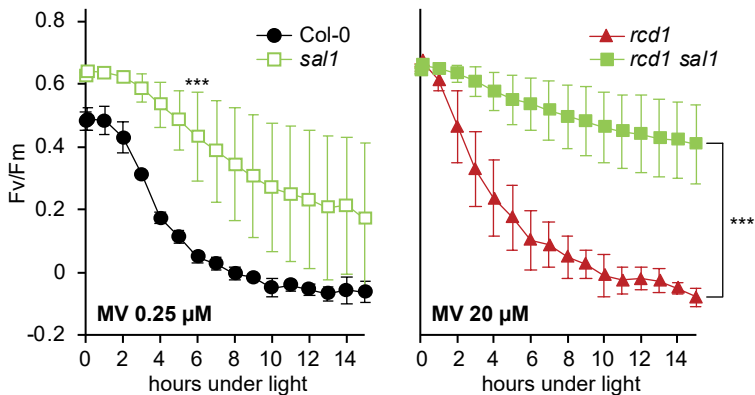

**Figure 6 – figure supplement 3. Tolerance of PSII to chloroplastic ROS in *sal1* mutants.**

Supplement: supp [file elife-43284-supp-v1.zip › elife_poa_e43284_Figure_6_figure_supplement_3.pdf]

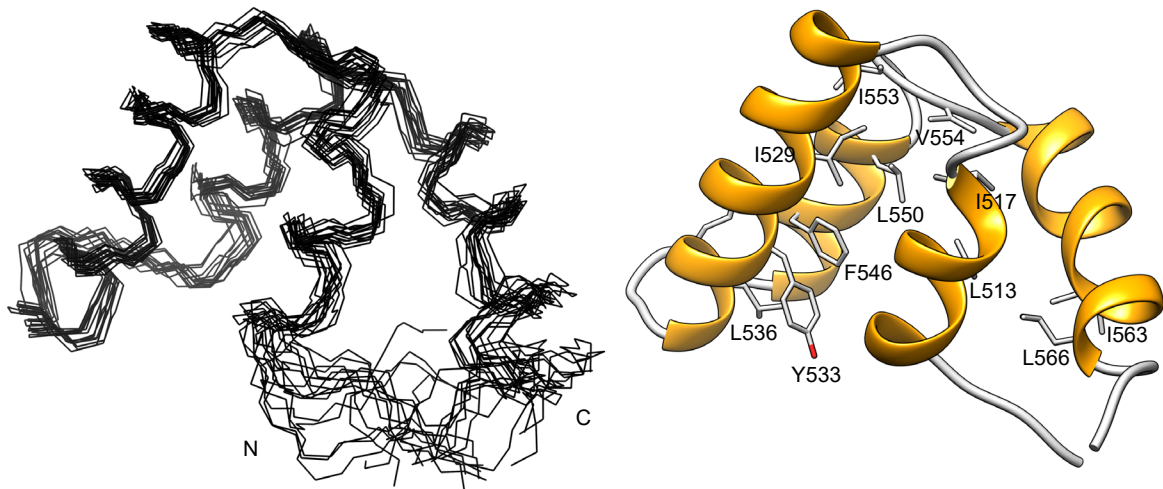

**Figure 7 – figure supplement 2. Structure of the RST domain of RCD1.**

Supplement: supp [file elife-43284-supp-v1.zip › elife_poa_e43284_Figure_7_figure_supplement_2.pdf]

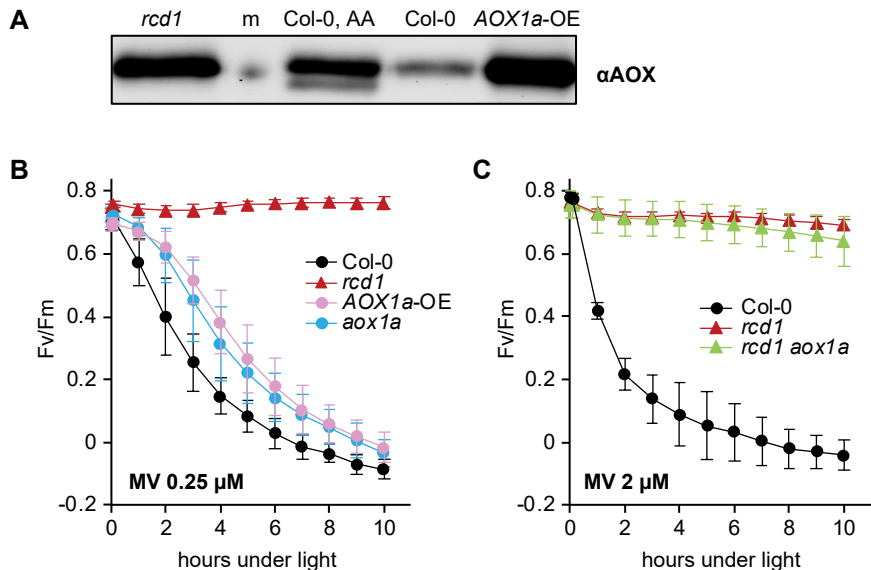

**Figure 4 – figure supplement 4. Irrelevance of AOX1a isoform for MV tolerance.**

Supplement: supp [file elife-43284-supp-v1.zip › elife_poa_e43284_Figure_4_figure_supplement_4.pdf]

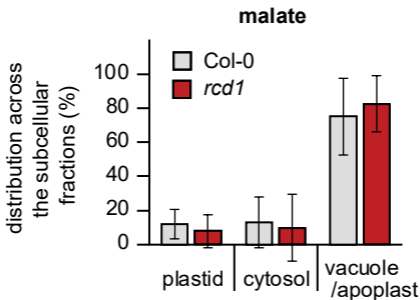

**Figure 5 – figure supplement 2.**  
**Distribution of malate**  
**in subcellular compartments**  
**of Col-0 and *rcd1*.**

Supplement: supp [file elife-43284-supp-v1.zip › elife_poa_e43284_Figure_5_figure_supplement_2.pdf]

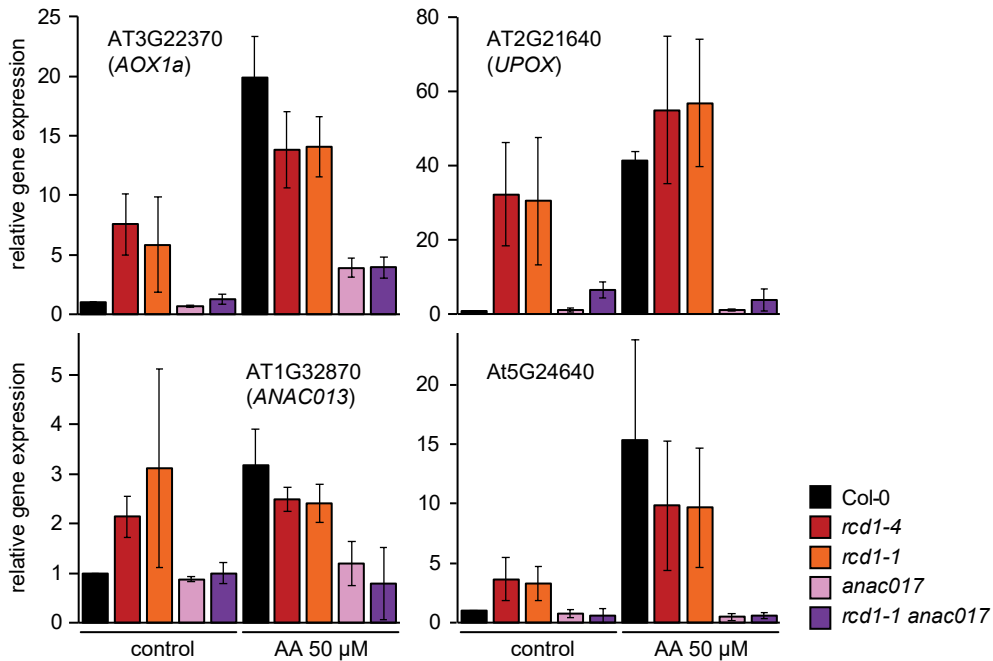

**Figure 8 – figure supplement 1. Induction of MDS genes in *anac017* and *rcd1 anac017* mutants.**

Supplement: supp [file elife-43284-supp-v1.zip › elife_poa_e43284_Figure_8_figure_supplement_1.pdf]

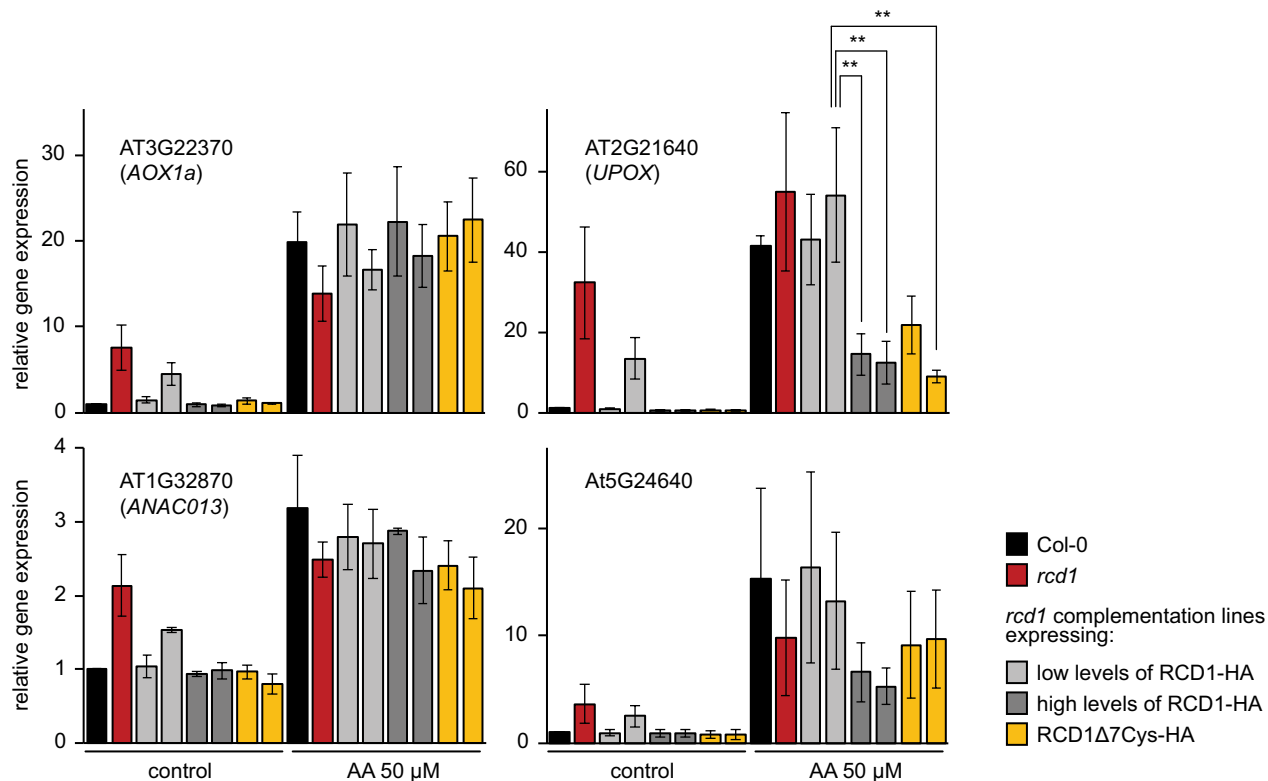

**Figure 6 – figure supplement 2. Induction of MDS genes in *rcd1*, and *rcd1* complementation lines.**

Supplement: supp [file elife-43284-supp-v1.zip › elife_poa_e43284_Figure_6_figure_supplement_2.pdf]
